# Supplementary material
Source: MDPI journal article supplement (https://www.mdpi.com/1996-1073/10/7/985)
Supplement: s1 [file s1]

## Sheet: Graphs I
						CONFIGURATION 1

## Sheet: Graphs II
						CONFIGURATION 2

## Sheet: Config I
Curves of efficiency		-321.09	-418.59	-556.2	-556.2
		50.328	63.579	72.719	72.719
		100	200	300																	CORRECTION
					DRY BULB AIR TEMPERATURE											IRRADIATION (HORIZONTAL)					slope=42°	Dawn time
DEMAND	1	MONTH		Tap water temp	c5	c4	c3	c2	c1	c0						d4	d3	d2	d1	d0	f	h
	1.333	Va - MAY	1	11	3.14308e-05	-0.00100426	-0.0124785	0.594461	-3.71298	20.8151					0.3463	0.221445	-10.6294	161.55	-815.944	1038.51	0.958	7
L/MIN	1.333	Va - JUN	2	12	2.77409e-05	-0.000754318	-0.0183027	0.646023	-3.81345	22.3254					10.641	0.14594	-7.00513	100.484	-394.145	273.017	0.924	5
		Va - JUL	3	13	3.25756e-05	-0.00104393	-0.0124088	0.602241	-3.7632	23.8747					18.786	0.180986	-8.68735	129.05	-595.255	736.429	0.958	5
		Va - AGO	4	12	5.05769e-05	-0.00218854	0.012559	0.398284	-3.40353	24.7229					10.842	0.26618	-12.7766	203.444	-1202.99	2417.54	1.068	6
		Va - SEP	5	11	6.40747e-05	-0.00305527	0.0322251	0.221284	-2.9446	23.4613					16.475	0.221445	-10.6294	161.55	-815.944	1038.51	1.236	7
			1
delta t	12
dens. Air	1.0021					Ttank (22h)	29.1383	C
dens. Water	991.1					Ttank (8h)	28.7777	C
SAH mass	1	kg				Ttank (9h)	26.1196	C
SAH surface	4	m2				Peak 1-savings	1.52926	kWh
Tair	80	C
Twater	40	C			tau
mair	300	m3/h	0.0835083	kg/s	11.9749
mwater	12	l/min	0.19822	kg/s	2522.45
T_outdoors	15	C
Tank capacity	500	kg	1.5	W/K
Tw,tap	11	C
Efficiency (min)	0.15
I_min	50
		7.5					Tcol	Tdep																3.10589			Computation - Peak of demand 1
i	t (s)	t(solar_s)	t(solar_h)	t_calc (h)	t_real (h)	Ta,e,col	Ta,s,col	Tw,e,bat	Tw,s,bat	density air	density water	cp,air (J/kgK)	mwater	cp,water	T ambient	I(t)	efficiency	Qcol (W)	md	Qair	Qwater	Calculated efficiency	Savings (W)	Savings (kWh)			t	Ttank	mreal	Savings (W)	Savings (kWh)
0	0	27000	7.5	0	9	15.9	15.9	10.9	10.9	1.22241	1000.15	1005.86	0.19822	4195.57	21.7198	213.177	0.879034	749.558	0				0	1.52926			0	28.7777	1.333	1650.94	0.00550313
1	12	27012	7.50333	0.00333333	9.00333	12.7481	24.8423	10.9	11.2187	1.18723	1000.15	1006.1	0.19822	4195.57	21.7266	213.775	0.960793	821.573	0	1016.12	265.012	1.18831	0	1.52926			0.00333333	28.7681	1.333	1650.05	0.0110033
2	24	27024	7.50667	0.00666667	9.00667	16.0276	20.2829	10.9016	11.7915	1.20499	1000.15	1005.97	0.19822	4195.57	21.7335	214.373	0.875233	750.504	0	357.473	740.095	0.418049	0	1.52926			0.00666667	28.7585	1.333	1649.16	0.0165005
3	36	27036	7.51	0.01	9.01	14.3605	24.1079	10.9059	11.5005	1.19007	1000.14	1006.07	0.19822	4195.57	21.7403	214.971	0.91813	789.484	0	818.931	494.507	0.957703	0	1.52926			0.01	28.7489	1.333	1648.27	0.0219947
4	48	27048	7.51333	0.0133333	9.01333	15.763	21.9245	10.9087	11.7498	1.19855	1000.14	1006.01	0.19822	4195.56	21.7472	215.568	0.881592	760.174	0	517.631	699.476	0.605347	0	1.52926			0.0133333	28.7394	1.333	1647.38	0.027486
5	60	27060	7.51667	0.0166667	9.01667	14.9664	23.6072	10.9128	11.6124	1.192	1000.14	1006.06	0.19822	4195.56	21.7541	216.166	0.901838	779.788	0	725.949	581.83	0.848966	0	1.52926			0.0166667	28.7298	1.333	1646.49	0.0329743
6	72	27072	7.52	0.02	9.02	15.5842	22.6084	10.9161	11.7241	1.19588	1000.14	1006.03	0.19822	4195.56	21.7609	216.764	0.885679	767.933	0	590.115	671.972	0.690114	0	1.52926			0.02	28.7202	1.333	1645.6	0.0384596
7	84	27084	7.52333	0.0233333	9.02333	15.2211	23.3683	10.92	11.6632	1.19293	1000.14	1006.05	0.19822	4195.55	21.7678	217.362	0.89471	777.902	0	684.47	618.065	0.800457	0	1.52926			0.0233333	28.7106	1.333	1644.71	0.043942
8	96	27096	7.52667	0.0266667	9.02667	15.5013	22.928	10.9236	11.7156	1.19464	1000.14	1006.04	0.19822	4195.55	21.7746	217.959	0.887276	773.56	0	623.935	658.677	0.729665	0	1.52926			0.0266667	28.7011	1.333	1643.82	0.0494214
9	108	27108	7.53	0.03	9.03	15.3425	23.2828	10.9274	11.6907	1.19326	1000.14	1006.05	0.19822	4195.54	21.7815	218.557	0.891054	778.983	0	667.088	634.802	0.78013	0	1.52926			0.03	28.6915	1.333	1642.94	0.0548978
10	120	27120	7.53333	0.0333333	9.03333	15.4745	23.0996	10.931	11.717	1.19397	1000.14	1006.04	0.19822	4195.54	21.7884	219.154	0.887431	777.937	0	640.604	653.658	0.749158	0	1.52926			0.0333333	28.682	1.333	1642.05	0.0603713
11	132	27132	7.53667	0.0366667	9.03667	15.4098	23.2746	10.9348	11.7087	1.19329	1000.14	1006.05	0.19822	4195.54	21.7952	219.752	0.888808	781.268	0	660.753	643.603	0.772722	0	1.52926			0.0366667	28.6724	1.333	1641.16	0.0658419
12	144	27144	7.54	0.04	9.04	15.476	23.2084	10.9385	11.7235	1.19355	1000.14	1006.05	0.19822	4195.53	21.8021	220.349	0.88687	781.684	0	649.62	652.803	0.759702	0	1.52926			0.04	28.6629	1.333	1640.28	0.0713094
13	156	27156	7.54333	0.0433333	9.04333	15.4541	23.3032	10.9423	11.7227	1.19318	1000.14	1006.05	0.19822	4195.53	21.8089	220.946	0.887164	784.062	0	659.437	649.035	0.771182	0	1.52926			0.0433333	28.6534	1.333	1639.39	0.0767741
14	168	27168	7.54667	0.0466667	9.04667	15.491	23.2899	10.946	11.7324	1.19324	1000.13	1006.05	0.19822	4195.52	21.8158	221.543	0.885978	785.13	0	655.212	653.925	0.766242	0	1.52926			0.0466667	28.6438	1.333	1638.51	0.0822358
15	180	27180	7.55	0.05	9.05	15.4884	23.3489	10.9498	11.735	1.19301	1000.13	1006.05	0.19822	4195.52	21.8226	222.14	0.885788	787.077	0	660.389	652.999	0.772296	0	1.52926			0.05	28.6343	1.333	1637.62	0.0876945
16	192	27192	7.55333	0.0533333	9.05333	15.5122	23.3594	10.9536	11.7424	1.19297	1000.13	1006.05	0.19822	4195.52	21.8295	222.738	0.884767	788.284	0	659.268	655.962	0.770985	0	1.52926			0.0533333	28.6248	1.333	1636.74	0.0931503
17	204	27204	7.55667	0.0566667	9.05667	15.5184	23.4005	10.9574	11.7466	1.19281	1000.13	1006.05	0.19822	4195.51	21.8364	223.334	0.884365	790.037	0	662.21	656.316	0.774425	0	1.52926			0.0566667	28.6153	1.333	1635.85	0.0986031
18	216	27216	7.56	0.06	9.06	15.5357	23.422	10.9612	11.7528	1.19272	1000.13	1006.05	0.19822	4195.51	21.8432	223.931	0.883686	791.54	0	662.563	658.318	0.774839	0	1.52926			0.06	28.6058	1.333	1634.97	0.104053
19	228	27228	7.56333	0.0633333	9.06333	15.5458	23.4571	10.965	11.7577	1.19259	1000.13	1006.05	0.19822	4195.5	21.8501	224.528	0.883189	793.203	0	664.659	659.264	0.77729	0	1.52926			0.0633333	28.5962	1.333	1634.09	0.1095
20	240	27240	7.56667	0.0666667	9.06667	15.5609	23.4834	10.9688	11.7635	1.19248	1000.13	1006.06	0.19822	4195.5	21.8569	225.125	0.882571	794.755	0	665.595	660.94	0.778383	0	1.52926			0.0666667	28.5867	1.333	1633.21	0.114944
21	252	27252	7.57	0.07	9.07	15.5728	23.5157	10.9726	11.7688	1.19236	1000.13	1006.06	0.19822	4195.5	21.8638	225.722	0.882036	796.378	0	667.309	662.14	0.780388	0	1.52926			0.07	28.5773	1.333	1632.32	0.120385
22	264	27264	7.57333	0.0733333	9.07333	15.5869	23.544	10.9764	11.7744	1.19225	1000.13	1006.06	0.19822	4195.49	21.8706	226.318	0.88145	797.953	0	668.504	663.665	0.781785	0	1.52926			0.0733333	28.5678	1.333	1631.44	0.125823
23	276	27276	7.57667	0.0766667	9.07667	15.5996	23.575	10.9802	11.7798	1.19213	1000.13	1006.06	0.19822	4195.49	21.8775	226.915	0.880903	799.559	0	670.046	664.975	0.78359	0	1.52926			0.0766667	28.5583	1.333	1630.56	0.131258
24	288	27288	7.58	0.08	9.08	15.6132	23.6042	10.9841	11.7854	1.19202	1000.13	1006.06	0.19822	4195.48	21.8844	227.511	0.880334	801.143	0	671.357	666.43	0.785122	0	1.52926			0.08	28.5488	1.333	1629.68	0.136691
25	300	27300	7.58333	0.0833333	9.08333	15.6262	23.6346	10.9879	11.7909	1.1919	1000.12	1006.06	0.19822	4195.48	21.8912	228.107	0.879784	802.741	0	672.823	667.789	0.786836	0	1.52926			0.0833333	28.5393	1.333	1628.8	0.14212
26	312	27312	7.58667	0.0866667	9.08667	15.6396	23.6643	10.9918	11.7965	1.19178	1000.12	1006.06	0.19822	4195.48	21.8981	228.704	0.879226	804.329	0	674.185	669.212	0.788429	0	1.52926			0.0866667	28.5299	1.333	1627.92	0.147546
27	324	27324	7.59	0.09	9.09	15.6528	23.6945	10.9956	11.802	1.19167	1000.12	1006.06	0.19822	4195.47	21.9049	229.3	0.878678	805.923	0	675.616	670.593	0.790103	0	1.52926			0.09	28.5204	1.333	1627.04	0.15297
28	336	27336	7.59333	0.0933333	9.09333	15.6662	23.7243	10.9995	11.8076	1.19155	1000.12	1006.06	0.19822	4195.47	21.9118	229.896	0.878128	807.512	0	677.001	672.002	0.791722	0	1.52926			0.0933333	28.5109	1.333	1626.16	0.15839
29	348	27348	7.59667	0.0966667	9.09667	15.6794	23.7544	11.0034	11.8131	1.19143	1000.12	1006.06	0.19822	4195.46	21.9186	230.492	0.877584	809.104	0	678.417	673.392	0.793378	0	1.52926			0.0966667	28.5015	1.333	1625.29	0.163808
30	360	27360	7.6	0.1	9.1	15.6927	23.7843	11.0073	11.8187	1.19132	1000.12	1006.06	0.19822	4195.46	21.9255	231.088	0.877041	810.693	0	679.812	674.795	0.79501	0	1.52926			0.1	28.492	1.333	1624.41	0.169223
31	372	27372	7.60333	0.103333	9.10333	15.706	23.8143	11.0112	11.8243	1.1912	1000.12	1006.06	0.19822	4195.45	21.9324	231.684	0.876501	812.284	0	681.221	676.189	0.796657	0	1.52926			0.103333	28.4826	1.333	1623.53	0.174635
32	384	27384	7.60667	0.106667	9.10667	15.7193	23.8443	11.0151	11.8299	1.19109	1000.12	1006.07	0.19822	4195.45	21.9392	232.279	0.875964	813.873	0	682.62	677.589	0.798294	0	1.52926			0.106667	28.4732	1.333	1622.66	0.180043
33	396	27396	7.61	0.11	9.11	15.7326	23.8743	11.019	11.8354	1.19097	1000.12	1006.07	0.19822	4195.45	21.9461	232.875	0.875429	815.462	0	684.026	678.985	0.799938	0	1.52926			0.11	28.4637	1.333	1621.78	0.185449
34	408	27408	7.61333	0.113333	9.11333	15.7459	23.9043	11.0229	11.841	1.19085	1000.12	1006.07	0.19822	4195.44	21.9529	233.47	0.874897	817.051	0	685.427	680.384	0.801577	0	1.52926			0.113333	28.4543	1.333	1620.9	0.190852
35	420	27420	7.61667	0.116667	9.11667	15.7592	23.9343	11.0268	11.8467	1.19074	1000.12	1006.07	0.19822	4195.44	21.9598	234.066	0.874368	818.639	0	686.832	681.781	0.803219	0	1.52926			0.116667	28.4449	1.333	1620.03	0.196252
36	432	27432	7.62	0.12	9.12	15.7726	23.9643	11.0308	11.8523	1.19062	1000.11	1006.07	0.19822	4195.43	21.9666	234.661	0.873841	820.227	0	688.234	683.179	0.804859	0	1.52926			0.12	28.4355	1.333	1619.16	0.20165
37	444	27444	7.62333	0.123333	9.12333	15.7859	23.9944	11.0347	11.8579	1.19051	1000.11	1006.07	0.19822	4195.43	21.9735	235.257	0.873317	821.814	0	689.638	684.576	0.8065	0	1.52926			0.123333	28.426	1.333	1618.28	0.207044
38	456	27456	7.62667	0.126667	9.12667	15.7992	24.0244	11.0387	11.8635	1.19039	1000.11	1006.07	0.19822	4195.43	21.9803	235.852	0.872795	823.401	0	691.04	685.973	0.808141	0	1.52926			0.126667	28.4166	1.333	1617.41	0.212435
39	468	27468	7.63	0.13	9.13	15.8126	24.0544	11.0426	11.8692	1.19027	1000.11	1006.07	0.19822	4195.42	21.9872	236.447	0.872276	824.988	0	692.443	687.37	0.809782	0	1.52926			0.13	28.4072	1.333	1616.53	0.217824
40	480	27480	7.63333	0.133333	9.13333	15.8259	24.0845	11.0466	11.8748	1.19016	1000.11	1006.07	0.19822	4195.42	21.994	237.042	0.87176	826.574	0	693.846	688.767	0.811422	0	1.52926			0.133333	28.3978	1.333	1615.66	0.223209
41	492	27492	7.63667	0.136667	9.13667	15.8393	24.1145	11.0506	11.8805	1.19004	1000.11	1006.07	0.19822	4195.41	22.0009	237.637	0.871245	828.16	0	695.249	690.165	0.813063	0	1.52926			0.136667	28.3884	1.333	1614.79	0.228592
42	504	27504	7.64	0.14	9.14	15.8526	24.1446	11.0545	11.8861	1.18993	1000.11	1006.07	0.19822	4195.41	22.0078	238.232	0.870734	829.745	0	696.651	691.562	0.814703	0	1.52926			0.14	28.3791	1.333	1613.92	0.233972
43	516	27516	7.64333	0.143333	9.14333	15.866	24.1746	11.0585	11.8918	1.18981	1000.11	1006.08	0.19822	4195.4	22.0146	238.826	0.870225	831.331	0	698.054	692.959	0.816343	0	1.52926			0.143333	28.3697	1.333	1613.05	0.239348
44	528	27528	7.64667	0.146667	9.14667	15.8794	24.2047	11.0625	11.8975	1.18969	1000.11	1006.08	0.19822	4195.4	22.0215	239.421	0.869718	832.915	0	699.457	694.356	0.817983	0	1.52926			0.146667	28.3603	1.333	1612.18	0.244722
45	540	27540	7.65	0.15	9.15	15.8927	24.2347	11.0665	11.9032	1.18958	1000.11	1006.08	0.19822	4195.4	22.0283	240.016	0.869214	834.499	0	700.859	695.752	0.819624	0	1.52926			0.15	28.3509	1.333	1611.31	0.250093
46	552	27552	7.65333	0.153333	9.15333	15.9061	24.2648	11.0705	11.9089	1.18946	1000.11	1006.08	0.19822	4195.39	22.0352	240.61	0.868712	836.083	0	702.261	697.149	0.821264	0	1.52926			0.153333	28.3416	1.333	1610.44	0.255462
47	564	27564	7.65667	0.156667	9.15667	15.9195	24.2949	11.0746	11.9146	1.18934	1000.1	1006.08	0.19822	4195.39	22.042	241.204	0.868213	837.666	0	703.664	698.546	0.822904	0	1.52926			0.156667	28.3322	1.333	1609.57	0.260827
48	576	27576	7.66	0.16	9.16	15.9329	24.3249	11.0786	11.9203	1.18923	1000.1	1006.08	0.19822	4195.38	22.0489	241.799	0.867715	839.249	0	705.066	699.942	0.824543	0	1.52926			0.16	28.3228	1.333	1608.7	0.266189
49	588	27588	7.66333	0.163333	9.16333	15.9463	24.355	11.0826	11.926	1.18911	1000.1	1006.08	0.19822	4195.38	22.0557	242.393	0.867221	840.832	0	706.468	701.339	0.826183	0	1.52926			0.163333	28.3135	1.333	1607.83	0.271548
50	600	27600	7.66667	0.166667	9.16667	15.9597	24.3851	11.0867	11.9317	1.189	1000.1	1006.08	0.19822	4195.37	22.0626	242.987	0.866728	842.414	0	707.87	702.735	0.827823	0	1.52926			0.166667	28.3041	1.333	1606.96	0.276905
51	612	27612	7.67	0.17	9.17	15.9731	24.4152	11.0907	11.9374	1.18888	1000.1	1006.08	0.19822	4195.37	22.0694	243.581	0.866238	843.995	0	709.272	704.132	0.829462	0	1.52926			0.17	28.2948	1.333	1606.09	0.282259
52	624	27624	7.67333	0.173333	9.17333	15.9865	24.4453	11.0948	11.9432	1.18876	1000.1	1006.08	0.19822	4195.37	22.0763	244.174	0.865751	845.577	0	710.674	705.528	0.831102	0	1.52926			0.173333	28.2855	1.333	1605.23	0.287609
53	636	27636	7.67667	0.176667	9.17667	16	24.4754	11.0989	11.9489	1.18865	1000.1	1006.08	0.19822	4195.36	22.0831	244.768	0.865265	847.157	0	712.076	706.924	0.832741	0	1.52926			0.176667	28.2761	1.333	1604.36	0.292957
54	648	27648	7.68	0.18	9.18	16.0134	24.5055	11.1029	11.9547	1.18853	1000.1	1006.09	0.19822	4195.36	22.09	245.362	0.864782	848.738	0	713.478	708.32	0.83438	0	1.52926			0.18	28.2668	1.333	1603.49	0.298302
55	660	27660	7.68333	0.183333	9.18333	16.0268	24.5356	11.107	11.9605	1.18841	1000.1	1006.09	0.19822	4195.35	22.0968	245.955	0.864301	850.317	0	714.879	709.716	0.836019	0	1.52926			0.183333	28.2575	1.333	1602.63	0.303644
56	672	27672	7.68667	0.186667	9.18667	16.0403	24.5657	11.1111	11.9662	1.1883	1000.1	1006.09	0.19822	4195.35	22.1037	246.549	0.863822	851.897	0	716.281	711.112	0.837658	0	1.52926			0.186667	28.2482	1.333	1601.76	0.308984
57	684	27684	7.69	0.19	9.19	16.0537	24.5959	11.1152	11.972	1.18818	1000.09	1006.09	0.19822	4195.34	22.1105	247.142	0.863346	853.476	0	717.682	712.508	0.839297	0	1.52926			0.19	28.2389	1.333	1600.9	0.31432
58	696	27696	7.69333	0.193333	9.19333	16.0672	24.626	11.1193	11.9778	1.18807	1000.09	1006.09	0.19822	4195.34	22.1174	247.735	0.862872	855.054	0	719.083	713.904	0.840936	0	1.52926			0.193333	28.2296	1.333	1600.03	0.319653
59	708	27708	7.69667	0.196667	9.19667	16.0806	24.6561	11.1234	11.9836	1.18795	1000.09	1006.09	0.19822	4195.33	22.1242	248.328	0.8624	856.632	0	720.485	715.299	0.842575	0	1.52926			0.196667	28.2203	1.333	1599.17	0.324984
60	720	27720	7.7	0.2	9.2	16.0941	24.6862	11.1276	11.9894	1.18783	1000.09	1006.09	0.19822	4195.33	22.1311	248.921	0.86193	858.21	0	721.886	716.695	0.844213	0	1.52926			0.2	28.211	1.333	1598.31	0.330312
61	732	27732	7.70333	0.203333	9.20333	16.1076	24.7164	11.1317	11.9952	1.18772	1000.09	1006.09	0.19822	4195.33	22.1379	249.514	0.861462	859.787	0	723.287	718.09	0.845852	0	1.52926			0.203333	28.2017	1.333	1597.44	0.335636
62	744	27744	7.70667	0.206667	9.20667	16.121	24.7465	11.1358	12.001	1.1876	1000.09	1006.09	0.19822	4195.32	22.1448	250.107	0.860996	861.364	0	724.688	719.486	0.84749	0	1.52926			0.206667	28.1924	1.333	1596.58	0.340958
63	756	27756	7.71	0.21	9.21	16.1345	24.7767	11.14	12.0069	1.18749	1000.09	1006.09	0.19822	4195.32	22.1516	250.699	0.860533	862.94	0	726.088	720.881	0.849128	0	1.52926			0.21	28.1831	1.333	1595.72	0.346277
64	768	27768	7.71333	0.213333	9.21333	16.148	24.8068	11.1442	12.0127	1.18737	1000.09	1006.09	0.19822	4195.31	22.1585	251.292	0.860072	864.516	0	727.489	722.276	0.850766	0	1.52926			0.213333	28.1738	1.333	1594.86	0.351594
65	780	27780	7.71667	0.216667	9.21667	16.1615	24.837	11.1483	12.0185	1.18725	1000.09	1006.1	0.19822	4195.31	22.1653	251.884	0.859612	866.091	0	728.89	723.671	0.852404	0	1.52926			0.216667	28.1646	1.333	1594	0.356907
66	792	27792	7.72	0.22	9.22	16.175	24.8671	11.1525	12.0244	1.18714	1000.09	1006.1	0.19822	4195.3	22.1721	252.477	0.859155	867.666	0	730.29	725.066	0.854042	0	1.52926			0.22	28.1553	1.333	1593.14	0.362217
67	804	27804	7.72333	0.223333	9.22333	16.1885	24.8973	11.1567	12.0303	1.18702	1000.08	1006.1	0.19822	4195.3	22.179	253.069	0.8587	869.241	0	731.69	726.46	0.855679	0	1.52926			0.223333	28.146	1.333	1592.28	0.367525
68	816	27816	7.72667	0.226667	9.22667	16.202	24.9274	11.1609	12.0361	1.1869	1000.08	1006.1	0.19822	4195.29	22.1858	253.661	0.858247	870.814	0	733.091	727.855	0.857317	0	1.52926			0.226667	28.1368	1.333	1591.42	0.37283
69	828	27828	7.73	0.23	9.23	16.2155	24.9576	11.1651	12.042	1.18679	1000.08	1006.1	0.19822	4195.29	22.1927	254.253	0.857796	872.388	0	734.491	729.25	0.858954	0	1.52926			0.23	28.1275	1.333	1590.56	0.378132
70	840	27840	7.73333	0.233333	9.23333	16.229	24.9878	11.1693	12.0479	1.18667	1000.08	1006.1	0.19822	4195.29	22.1995	254.845	0.857347	873.961	0	735.891	730.644	0.860591	0	1.52926			0.233333	28.1183	1.333	1589.7	0.383431
71	852	27852	7.73667	0.236667	9.23667	16.2426	25.018	11.1735	12.0538	1.18656	1000.08	1006.1	0.19822	4195.28	22.2064	255.436	0.8569	875.533	0	737.291	732.038	0.862229	0	1.52926			0.236667	28.109	1.333	1588.84	0.388727
72	864	27864	7.74	0.24	9.24	16.2561	25.0481	11.1777	12.0597	1.18644	1000.08	1006.1	0.19822	4195.28	22.2132	256.028	0.856455	877.105	0	738.69	733.432	0.863865	0	1.52926			0.24	28.0998	1.333	1587.98	0.39402
73	876	27876	7.74333	0.243333	9.24333	16.2696	25.0783	11.1819	12.0656	1.18632	1000.08	1006.1	0.19822	4195.27	22.2201	256.619	0.856012	878.677	0	740.09	734.826	0.865502	0	1.52926			0.243333	28.0906	1.333	1587.13	0.39931
74	888	27888	7.74667	0.246667	9.24667	16.2832	25.1085	11.1862	12.0715	1.18621	1000.08	1006.1	0.19822	4195.27	22.2269	257.211	0.855571	880.248	0	741.489	736.22	0.867139	0	1.52926			0.246667	28.0814	1.333	1586.27	0.404598
75	900	27900	7.75	0.25	9.25	16.2967	25.1387	11.1904	12.0774	1.18609	1000.08	1006.1	0.19822	4195.26	22.2337	257.802	0.855132	881.819	0	742.889	737.614	0.868775	0	1.52926			0.25	28.0721	1.333	1585.41	0.409883
76	912	27912	7.75333	0.253333	9.25333	16.3102	25.1689	11.1947	12.0833	1.18597	1000.08	1006.11	0.19822	4195.26	22.2406	258.393	0.854695	883.389	0	744.288	739.008	0.870411	0	1.52926			0.253333	28.0629	1.333	1584.56	0.415165
77	924	27924	7.75667	0.256667	9.25667	16.3238	25.1991	11.1989	12.0893	1.18586	1000.07	1006.11	0.19822	4195.25	22.2474	258.984	0.85426	884.958	0	745.687	740.401	0.872048	0	1.52926			0.256667	28.0537	1.333	1583.7	0.420444
78	936	27936	7.76	0.26	9.26	16.3374	25.2293	11.2032	12.0952	1.18574	1000.07	1006.11	0.19822	4195.25	22.2543	259.575	0.853827	886.528	0	747.086	741.795	0.873684	0	1.52926			0.26	28.0445	1.333	1582.85	0.42572
79	948	27948	7.76333	0.263333	9.26333	16.3509	25.2595	11.2075	12.1012	1.18563	1000.07	1006.11	0.19822	4195.24	22.2611	260.165	0.853396	888.096	0	748.484	743.188	0.875319	0	1.52926			0.263333	28.0353	1.333	1581.99	0.430993
80	960	27960	7.76667	0.266667	9.26667	16.3645	25.2897	11.2117	12.1071	1.18551	1000.07	1006.11	0.19822	4195.24	22.268	260.756	0.852966	889.664	0	749.883	744.581	0.876955	0	1.52926			0.266667	28.0261	1.333	1581.14	0.436264
81	972	27972	7.77	0.27	9.27	16.3781	25.3199	11.216	12.1131	1.18539	1000.07	1006.11	0.19822	4195.24	22.2748	261.346	0.852539	891.232	0	751.282	745.974	0.87859	0	1.52926			0.27	28.0169	1.333	1580.29	0.441531
82	984	27984	7.77333	0.273333	9.27333	16.3917	25.3502	11.2203	12.1191	1.18528	1000.07	1006.11	0.19822	4195.23	22.2816	261.937	0.852113	892.799	0	752.68	747.367	0.880226	0	1.52926			0.273333	28.0077	1.333	1579.43	0.446796
83	996	27996	7.77667	0.276667	9.27667	16.4052	25.3804	11.2246	12.1251	1.18516	1000.07	1006.11	0.19822	4195.23	22.2885	262.527	0.851689	894.366	0	754.078	748.759	0.881861	0	1.52926			0.276667	27.9985	1.333	1578.58	0.452058
84	1008	28008	7.78	0.28	9.28	16.4188	25.4106	11.229	12.131	1.18505	1000.07	1006.11	0.19822	4195.22	22.2953	263.117	0.851267	895.932	0	755.476	750.152	0.883496	0	1.52926			0.28	27.9894	1.333	1577.73	0.457317
85	1020	28020	7.78333	0.283333	9.28333	16.4324	25.4408	11.2333	12.137	1.18493	1000.07	1006.11	0.19822	4195.22	22.3021	263.707	0.850847	897.498	0	756.874	751.544	0.88513	0	1.52926			0.283333	27.9802	1.333	1576.88	0.462573
86	1032	28032	7.78667	0.286667	9.28667	16.446	25.4711	11.2376	12.1431	1.18481	1000.07	1006.11	0.19822	4195.21	22.309	264.297	0.850429	899.063	0	758.272	752.936	0.886765	0	1.52926			0.286667	27.971	1.333	1576.03	0.467827
87	1044	28044	7.79	0.29	9.29	16.4596	25.5013	11.242	12.1491	1.1847	1000.06	1006.12	0.19822	4195.21	22.3158	264.886	0.850012	900.627	0	759.669	754.328	0.888399	0	1.52926			0.29	27.9619	1.333	1575.18	0.473077
88	1056	28056	7.79333	0.293333	9.29333	16.4733	25.5315	11.2463	12.1551	1.18458	1000.06	1006.12	0.19822	4195.2	22.3227	265.476	0.849598	902.191	0	761.067	755.72	0.890034	0	1.52926			0.293333	27.9527	1.333	1574.33	0.478325
89	1068	28068	7.79667	0.296667	9.29667	16.4869	25.5618	11.2507	12.1611	1.18447	1000.06	1006.12	0.19822	4195.2	22.3295	266.065	0.849185	903.755	0	762.464	757.112	0.891668	0	1.52926			0.296667	27.9436	1.333	1573.48	0.48357
90	1080	28080	7.8	0.3	9.3	16.5005	25.592	11.255	12.1672	1.18435	1000.06	1006.12	0.19822	4195.19	22.3363	266.655	0.848774	905.318	0	763.861	758.504	0.893302	0	1.52926			0.3	27.9344	1.333	1572.63	0.488812
91	1092	28092	7.80333	0.303333	9.30333	16.5141	25.6223	11.2594	12.1732	1.18423	1000.06	1006.12	0.19822	4195.19	22.3432	267.244	0.848364	906.881	0	765.258	759.895	0.894935	0	1.52926			0.303333	27.9253	1.333	1571.78	0.494051
92	1104	28104	7.80667	0.306667	9.30667	16.5278	25.6525	11.2638	12.1793	1.18412	1000.06	1006.12	0.19822	4195.18	22.35	267.833	0.847957	908.443	0	766.655	761.286	0.896569	0	1.52926			0.306667	27.9161	1.333	1570.93	0.499288
93	1116	28116	7.81	0.31	9.31	16.5414	25.6828	11.2682	12.1853	1.184	1000.06	1006.12	0.19822	4195.18	22.3568	268.422	0.847551	910.004	0	768.051	762.677	0.898202	0	1.52926			0.31	27.907	1.333	1570.08	0.504521
94	1128	28128	7.81333	0.313333	9.31333	16.555	25.713	11.2726	12.1914	1.18388	1000.06	1006.12	0.19822	4195.18	22.3637	269.011	0.847146	911.565	0	769.448	764.068	0.899835	0	1.52926			0.313333	27.8979	1.333	1569.23	0.509752
95	1140	28140	7.81667	0.316667	9.31667	16.5687	25.7433	11.277	12.1975	1.18377	1000.06	1006.12	0.19822	4195.17	22.3705	269.599	0.846744	913.126	0	770.844	765.459	0.901468	0	1.52926			0.316667	27.8888	1.333	1568.39	0.51498
96	1152	28152	7.82	0.32	9.32	16.5824	25.7735	11.2814	12.2035	1.18365	1000.06	1006.12	0.19822	4195.17	22.3773	270.188	0.846343	914.686	0	772.24	766.85	0.9031	0	1.52926			0.32	27.8797	1.333	1567.54	0.520205
97	1164	28164	7.82333	0.323333	9.32333	16.596	25.8038	11.2858	12.2096	1.18354	1000.05	1006.12	0.19822	4195.16	22.3842	270.776	0.845944	916.245	0	773.636	768.24	0.904733	0	1.52926			0.323333	27.8705	1.333	1566.69	0.525428
98	1176	28176	7.82667	0.326667	9.32667	16.6097	25.8341	11.2902	12.2157	1.18342	1000.05	1006.13	0.19822	4195.16	22.391	271.364	0.845547	917.804	0	775.032	769.63	0.906365	0	1.52926			0.326667	27.8614	1.333	1565.85	0.530647
99	1188	28188	7.83	0.33	9.33	16.6233	25.8643	11.2947	12.2218	1.1833	1000.05	1006.13	0.19822	4195.15	22.3978	271.952	0.845151	919.362	0	776.427	771.02	0.907997	0	1.52926			0.33	27.8523	1.333	1565	0.535864
100	1200	28200	7.83333	0.333333	9.33333	16.637	25.8946	11.2991	12.228	1.18319	1000.05	1006.13	0.19822	4195.15	22.4047	272.54	0.844757	920.92	0	777.823	772.41	0.909629	0	1.52926			0.333333	27.8432	1.333	1564.16	0.541078
101	1212	28212	7.83667	0.336667	9.33667	16.6507	25.9249	11.3035	12.2341	1.18307	1000.05	1006.13	0.19822	4195.14	22.4115	273.128	0.844364	922.477	0	779.218	773.8	0.911261	0	1.52926			0.336667	27.8341	1.333	1563.31	0.546289
102	1224	28224	7.84	0.34	9.34	16.6644	25.9552	11.308	12.2402	1.18296	1000.05	1006.13	0.19822	4195.14	22.4183	273.715	0.843974	924.034	0	780.613	775.19	0.912892	0	1.52926			0.34	27.8251	1.333	1562.47	0.551497
103	1236	28236	7.84333	0.343333	9.34333	16.6781	25.9854	11.3125	12.2464	1.18284	1000.05	1006.13	0.19822	4195.13	22.4251	274.303	0.843584	925.59	0	782.008	776.579	0.914523	0	1.52926			0.343333	27.816	1.333	1561.63	0.556702
104	1248	28248	7.84667	0.346667	9.34667	16.6918	26.0157	11.3169	12.2525	1.18272	1000.05	1006.13	0.19822	4195.13	22.432	274.89	0.843197	927.146	0	783.402	777.968	0.916154	0	1.52926			0.346667	27.8069	1.333	1560.78	0.561905
105	1260	28260	7.85	0.35	9.35	16.7055	26.046	11.3214	12.2587	1.18261	1000.05	1006.13	0.19822	4195.12	22.4388	275.477	0.842811	928.701	0	784.797	779.357	0.917785	0	1.52926			0.35	27.7978	1.333	1559.94	0.567105
106	1272	28272	7.85333	0.353333	9.35333	16.7192	26.0763	11.3259	12.2648	1.18249	1000.04	1006.13	0.19822	4195.12	22.4456	276.064	0.842426	930.256	0	786.191	780.746	0.919415	0	1.52926			0.353333	27.7888	1.333	1559.1	0.572302
107	1284	28284	7.85667	0.356667	9.35667	16.7329	26.1066	11.3304	12.271	1.18238	1000.04	1006.13	0.19822	4195.11	22.4525	276.651	0.842044	931.81	0	787.585	782.134	0.921046	0	1.52926			0.356667	27.7797	1.333	1558.26	0.577496
108	1296	28296	7.86	0.36	9.36	16.7466	26.1369	11.3349	12.2772	1.18226	1000.04	1006.13	0.19822	4195.11	22.4593	277.238	0.841662	933.363	0	788.979	783.523	0.922676	0	1.52926			0.36	27.7706	1.333	1557.42	0.582687
109	1308	28308	7.86333	0.363333	9.36333	16.7603	26.1672	11.3394	12.2833	1.18214	1000.04	1006.14	0.19822	4195.1	22.4661	277.825	0.841283	934.916	0	790.372	784.911	0.924305	0	1.52926			0.363333	27.7616	1.333	1556.58	0.587876
110	1320	28320	7.86667	0.366667	9.36667	16.774	26.1975	11.344	12.2895	1.18203	1000.04	1006.14	0.19822	4195.1	22.4729	278.411	0.840905	936.468	0	791.766	786.299	0.925935	0	1.52926			0.366667	27.7525	1.333	1555.74	0.593062
111	1332	28332	7.87	0.37	9.37	16.7877	26.2278	11.3485	12.2957	1.18191	1000.04	1006.14	0.19822	4195.09	22.4798	278.997	0.840528	938.02	0	793.159	787.687	0.927564	0	1.52926			0.37	27.7435	1.333	1554.9	0.598245
112	1344	28344	7.87333	0.373333	9.37333	16.8015	26.2581	11.353	12.3019	1.1818	1000.04	1006.14	0.19822	4195.09	22.4866	279.583	0.840153	939.571	0	794.552	789.075	0.929194	0	1.52926			0.373333	27.7345	1.333	1554.06	0.603425
113	1356	28356	7.87667	0.376667	9.37667	16.8152	26.2884	11.3576	12.3082	1.18168	1000.04	1006.14	0.19822	4195.08	22.4934	280.169	0.83978	941.122	0	795.945	790.462	0.930822	0	1.52926			0.376667	27.7254	1.333	1553.22	0.608602
114	1368	28368	7.88	0.38	9.38	16.829	26.3187	11.3621	12.3144	1.18156	1000.04	1006.14	0.19822	4195.08	22.5002	280.755	0.839408	942.672	0	797.338	791.849	0.932451	0	1.52926			0.38	27.7164	1.333	1552.38	0.613777
115	1380	28380	7.88333	0.383333	9.38333	16.8427	26.349	11.3667	12.3206	1.18145	1000.04	1006.14	0.19822	4195.08	22.5071	281.341	0.839037	944.222	0	798.73	793.236	0.934079	0	1.52926			0.383333	27.7074	1.333	1551.54	0.618949
116	1392	28392	7.88667	0.386667	9.38667	16.8565	26.3793	11.3713	12.3269	1.18133	1000.03	1006.14	0.19822	4195.07	22.5139	281.926	0.838668	945.771	0	800.122	794.623	0.935708	0	1.52926			0.386667	27.6984	1.333	1550.7	0.624118
117	1404	28404	7.89	0.39	9.39	16.8702	26.4096	11.3758	12.3331	1.18122	1000.03	1006.14	0.19822	4195.07	22.5207	282.512	0.838301	947.319	0	801.514	796.009	0.937335	0	1.52926			0.39	27.6893	1.333	1549.87	0.629284
118	1416	28416	7.89333	0.393333	9.39333	16.884	26.4399	11.3804	12.3394	1.1811	1000.03	1006.14	0.19822	4195.06	22.5275	283.097	0.837935	948.867	0	802.906	797.396	0.938963	0	1.52926			0.393333	27.6803	1.333	1549.03	0.634447
119	1428	28428	7.89667	0.396667	9.39667	16.8977	26.4703	11.385	12.3456	1.18098	1000.03	1006.14	0.19822	4195.06	22.5343	283.682	0.83757	950.414	0	804.298	798.782	0.94059	0	1.52926			0.396667	27.6713	1.333	1548.19	0.639608
120	1440	28440	7.9	0.4	9.4	16.9115	26.5006	11.3896	12.3519	1.18087	1000.03	1006.15	0.19822	4195.05	22.5412	284.267	0.837207	951.961	0	805.689	800.168	0.942218	0	1.52926			0.4	27.6623	1.333	1547.36	0.644766
121	1452	28452	7.90333	0.403333	9.40333	16.9253	26.5309	11.3942	12.3582	1.18075	1000.03	1006.15	0.19822	4195.05	22.548	284.852	0.836845	953.507	0	807.08	801.554	0.943844	0	1.52926			0.403333	27.6533	1.333	1546.52	0.649921
122	1464	28464	7.90667	0.406667	9.40667	16.9391	26.5612	11.3988	12.3644	1.18064	1000.03	1006.15	0.19822	4195.04	22.5548	285.436	0.836485	955.053	0	808.471	802.939	0.945471	0	1.52926			0.406667	27.6444	1.333	1545.69	0.655073
123	1476	28476	7.91	0.41	9.41	16.9528	26.5915	11.4035	12.3707	1.18052	1000.03	1006.15	0.19822	4195.04	22.5616	286.021	0.836126	956.598	0	809.862	804.324	0.947097	0	1.52926			0.41	27.6354	1.333	1544.86	0.660223
124	1488	28488	7.91333	0.413333	9.41333	16.9666	26.6219	11.4081	12.377	1.1804	1000.03	1006.15	0.19822	4195.03	22.5684	286.605	0.835769	958.142	0	811.252	805.709	0.948723	0	1.52926			0.413333	27.6264	1.333	1544.02	0.665369
125	1500	28500	7.91667	0.416667	9.41667	16.9804	26.6522	11.4127	12.3833	1.18029	1000.02	1006.15	0.19822	4195.03	22.5752	287.189	0.835413	959.686	0	812.642	807.094	0.950349	0	1.52926			0.416667	27.6174	1.333	1543.19	0.670513
126	1512	28512	7.92	0.42	9.42	16.9942	26.6825	11.4174	12.3897	1.18017	1000.02	1006.15	0.19822	4195.02	22.5821	287.773	0.835059	961.229	0	814.032	808.479	0.951975	0	1.52926			0.42	27.6085	1.333	1542.36	0.675655
127	1524	28524	7.92333	0.423333	9.42333	17.008	26.7129	11.422	12.396	1.18006	1000.02	1006.15	0.19822	4195.02	22.5889	288.357	0.834705	962.772	0	815.422	809.863	0.9536	0	1.52926			0.423333	27.5995	1.333	1541.52	0.680793
128	1536	28536	7.92667	0.426667	9.42667	17.0218	26.7432	11.4267	12.4023	1.17994	1000.02	1006.15	0.19822	4195.01	22.5957	288.94	0.834354	964.314	0	816.812	811.247	0.955225	0	1.52926			0.426667	27.5905	1.333	1540.69	0.685929
129	1548	28548	7.93	0.43	9.43	17.0356	26.7735	11.4314	12.4086	1.17983	1000.02	1006.15	0.19822	4195.01	22.6025	289.524	0.834003	965.855	0	818.201	812.631	0.95685	0	1.52926			0.43	27.5816	1.333	1539.86	0.691061
130	1560	28560	7.93333	0.433333	9.43333	17.0494	26.8039	11.4361	12.415	1.17971	1000.02	1006.16	0.19822	4195	22.6093	290.107	0.833654	967.396	0	819.59	814.015	0.958474	0	1.52926			0.433333	27.5726	1.333	1539.03	0.696192
131	1572	28572	7.93667	0.436667	9.43667	17.0633	26.8342	11.4407	12.4213	1.17959	1000.02	1006.16	0.19822	4195	22.6161	290.69	0.833307	968.936	0	820.979	815.398	0.960098	0	1.52926			0.436667	27.5637	1.333	1538.2	0.701319
132	1584	28584	7.94	0.44	9.44	17.0771	26.8646	11.4454	12.4277	1.17948	1000.02	1006.16	0.19822	4194.99	22.6229	291.273	0.83296	970.476	0	822.367	816.782	0.961722	0	1.52926			0.44	27.5547	1.333	1537.37	0.706443
133	1596	28596	7.94333	0.443333	9.44333	17.0909	26.8949	11.4501	12.4341	1.17936	1000.02	1006.16	0.19822	4194.99	22.6297	291.856	0.832615	972.015	0	823.756	818.165	0.963346	0	1.52926			0.443333	27.5458	1.333	1536.54	0.711565
134	1608	28608	7.94667	0.446667	9.44667	17.1048	26.9252	11.4549	12.4404	1.17925	1000.01	1006.16	0.19822	4194.98	22.6365	292.438	0.832272	973.553	0	825.144	819.547	0.964969	0	1.52926			0.446667	27.5369	1.333	1535.71	0.716684
135	1620	28620	7.95	0.45	9.45	17.1186	26.9556	11.4596	12.4468	1.17913	1000.01	1006.16	0.19822	4194.98	22.6434	293.021	0.83193	975.091	0	826.532	820.93	0.966592	0	1.52926			0.45	27.5279	1.333	1534.88	0.721801
136	1632	28632	7.95333	0.453333	9.45333	17.1324	26.9859	11.4643	12.4532	1.17901	1000.01	1006.16	0.19822	4194.97	22.6502	293.603	0.831589	976.628	0	827.919	822.312	0.968215	0	1.52926			0.453333	27.519	1.333	1534.05	0.726914
137	1644	28644	7.95667	0.456667	9.45667	17.1463	27.0163	11.469	12.4596	1.1789	1000.01	1006.16	0.19822	4194.97	22.657	294.185	0.831249	978.165	0	829.307	823.694	0.969837	0	1.52926			0.456667	27.5101	1.333	1533.22	0.732025
138	1656	28656	7.96	0.46	9.46	17.1601	27.0466	11.4738	12.466	1.17878	1000.01	1006.16	0.19822	4194.96	22.6638	294.767	0.830911	979.701	0	830.694	825.076	0.971459	0	1.52926			0.46	27.5012	1.333	1532.4	0.737133
139	1668	28668	7.96333	0.463333	9.46333	17.174	27.077	11.4785	12.4724	1.17867	1000.01	1006.16	0.19822	4194.96	22.6706	295.349	0.830574	981.236	0	832.081	826.457	0.973081	0	1.52926			0.463333	27.4923	1.333	1531.57	0.742238
140	1680	28680	7.96667	0.466667	9.46667	17.1878	27.1073	11.4833	12.4789	1.17855	1000.01	1006.16	0.19822	4194.95	22.6774	295.93	0.830238	982.771	0	833.467	827.838	0.974703	0	1.52926			0.466667	27.4834	1.333	1530.74	0.74734
141	1692	28692	7.97	0.47	9.47	17.2017	27.1377	11.4881	12.4853	1.17844	1000.01	1006.17	0.19822	4194.95	22.6842	296.512	0.829903	984.305	0	834.853	829.219	0.976324	0	1.52926			0.47	27.4745	1.333	1529.92	0.75244
142	1704	28704	7.97333	0.473333	9.47333	17.2156	27.168	11.4928	12.4917	1.17832	1000.01	1006.17	0.19822	4194.94	22.691	297.093	0.82957	985.838	0	836.24	830.6	0.977945	0	1.52926			0.473333	27.4656	1.333	1529.09	0.757537
143	1716	28716	7.97667	0.476667	9.47667	17.2294	27.1984	11.4976	12.4982	1.1782	1000	1006.17	0.19822	4194.94	22.6978	297.674	0.829238	987.371	0	837.625	831.981	0.979566	0	1.52926			0.476667	27.4567	1.333	1528.26	0.762631
144	1728	28728	7.98	0.48	9.48	17.2433	27.2288	11.5024	12.5046	1.17809	1000	1006.17	0.19822	4194.93	22.7046	298.255	0.828908	988.903	0	839.011	833.361	0.981186	0	1.52926			0.48	27.4478	1.333	1527.44	0.767723
145	1740	28740	7.98333	0.483333	9.48333	17.2572	27.2591	11.5072	12.5111	1.17797	1000	1006.17	0.19822	4194.93	22.7114	298.836	0.828578	990.435	0	840.396	834.741	0.982806	0	1.52926			0.483333	27.439	1.333	1526.62	0.772812
146	1752	28752	7.98667	0.486667	9.48667	17.2711	27.2895	11.512	12.5175	1.17786	1000	1006.17	0.19822	4194.92	22.7182	299.416	0.82825	991.966	0	841.781	836.12	0.984426	0	1.52926			0.486667	27.4301	1.333	1525.79	0.777897
147	1764	28764	7.99	0.49	9.49	17.285	27.3198	11.5168	12.524	1.17774	999.999	1006.17	0.19822	4194.92	22.725	299.997	0.827923	993.497	0	843.166	837.5	0.986045	0	1.52926			0.49	27.4212	1.333	1524.97	0.782981
148	1776	28776	7.99333	0.493333	9.49333	17.2989	27.3502	11.5216	12.5305	1.17763	999.998	1006.17	0.19822	4194.91	22.7318	300.577	0.827598	995.026	0	844.55	838.879	0.987664	0	1.52926			0.493333	27.4124	1.333	1524.14	0.788061
149	1788	28788	7.99667	0.496667	9.49667	17.3128	27.3806	11.5265	12.537	1.17751	999.997	1006.17	0.19822	4194.91	22.7386	301.157	0.827273	996.555	0	845.934	840.258	0.989283	0	1.52926			0.496667	27.4035	1.333	1523.32	0.793139
150	1800	28800	8	0.5	9.5	17.3267	27.4109	11.5313	12.5435	1.1774	999.996	1006.17	0.19822	4194.9	22.7454	301.737	0.82695	998.084	0	847.318	841.636	0.990901	0	1.52926			0.5	27.3946	1.333	1522.5	0.798214
151	1812	28812	8.00333	0.503333	9.50333	17.3406	27.4413	11.5361	12.55	1.17728	999.995	1006.18	0.19822	4194.9	22.7522	302.316	0.826628	999.612	0	848.702	843.015	0.992519	0	1.52926			0.503333	27.3858	1.333	1521.68	0.803286
152	1824	28824	8.00667	0.506667	9.50667	17.3545	27.4716	11.541	12.5565	1.17716	999.994	1006.18	0.19822	4194.89	22.759	302.896	0.826307	1001.14	0	850.085	844.393	0.994137	0	1.52926			0.506667	27.377	1.333	1520.86	0.808356
153	1836	28836	8.01	0.51	9.51	17.3684	27.502	11.5459	12.563	1.17705	999.992	1006.18	0.19822	4194.89	22.7658	303.475	0.825987	1002.67	0	851.468	845.77	0.995754	0	1.52926			0.51	27.3681	1.333	1520.04	0.813423
154	1848	28848	8.01333	0.513333	9.51333	17.3823	27.5324	11.5507	12.5695	1.17693	999.991	1006.18	0.19822	4194.88	22.7726	304.054	0.825669	1004.19	0	852.851	847.148	0.997372	0	1.52926			0.513333	27.3593	1.333	1519.22	0.818487
155	1860	28860	8.01667	0.516667	9.51667	17.3962	27.5627	11.5556	12.5761	1.17682	999.99	1006.18	0.19822	4194.88	22.7794	304.633	0.825352	1005.72	0	854.234	848.525	0.998988	0	1.52926			0.516667	27.3505	1.333	1518.4	0.823548
156	1872	28872	8.02	0.52	9.52	17.4102	27.5931	11.5605	12.5826	1.1767	999.989	1006.18	0.19822	4194.87	22.7862	305.211	0.825036	1007.24	0	855.616	849.902	1.0006	0	1.52926			0.52	27.3416	1.333	1517.58	0.828606
157	1884	28884	8.02333	0.523333	9.52333	17.4241	27.6235	11.5654	12.5892	1.17659	999.988	1006.18	0.19822	4194.87	22.793	305.79	0.824721	1008.77	0	856.998	851.279	1.00222	0	1.52926			0.523333	27.3328	1.333	1516.76	0.833662
158	1896	28896	8.02667	0.526667	9.52667	17.438	27.6538	11.5703	12.5957	1.17647	999.987	1006.18	0.19822	4194.86	22.7998	306.368	0.824407	1010.29	0	858.379	852.655	1.00384	0	1.52926			0.526667	27.324	1.333	1515.94	0.838715
159	1908	28908	8.03	0.53	9.53	17.452	27.6842	11.5752	12.6023	1.17636	999.985	1006.18	0.19822	4194.85	22.8065	306.946	0.824094	1011.81	0	859.761	854.031	1.00545	0	1.52926			0.53	27.3152	1.333	1515.12	0.843766
160	1920	28920	8.03333	0.533333	9.53333	17.4659	27.7146	11.5801	12.6089	1.17624	999.984	1006.18	0.19822	4194.85	22.8133	307.524	0.823783	1013.33	0	861.142	855.407	1.00707	0	1.52926			0.533333	27.3064	1.333	1514.3	0.848814
161	1932	28932	8.03667	0.536667	9.53667	17.4799	27.7449	11.585	12.6154	1.17612	999.983	1006.19	0.19822	4194.84	22.8201	308.102	0.823472	1014.85	0	862.522	856.782	1.00868	0	1.52926			0.536667	27.2976	1.333	1513.49	0.853858
162	1944	28944	8.04	0.54	9.54	17.4938	27.7753	11.59	12.622	1.17601	999.982	1006.19	0.19822	4194.84	22.8269	308.68	0.823163	1016.38	0	863.903	858.157	1.0103	0	1.52926			0.54	27.2888	1.333	1512.67	0.858901
163	1956	28956	8.04333	0.543333	9.54333	17.5078	27.8057	11.5949	12.6286	1.17589	999.981	1006.19	0.19822	4194.83	22.8337	309.257	0.822855	1017.9	0	865.283	859.532	1.01191	0	1.52926			0.543333	27.28	1.333	1511.85	0.86394
164	1968	28968	8.04667	0.546667	9.54667	17.5217	27.836	11.5998	12.6352	1.17578	999.98	1006.19	0.19822	4194.83	22.8405	309.834	0.822548	1019.41	0	866.663	860.907	1.01352	0	1.52926			0.546667	27.2712	1.333	1511.04	0.868977
165	1980	28980	8.05	0.55	9.55	17.5357	27.8664	11.6048	12.6418	1.17566	999.978	1006.19	0.19822	4194.82	22.8473	310.411	0.822242	1020.93	0	868.042	862.281	1.01514	0	1.52926			0.55	27.2624	1.333	1510.22	0.874011
166	1992	28992	8.05333	0.553333	9.55333	17.5496	27.8968	11.6098	12.6484	1.17555	999.977	1006.19	0.19822	4194.82	22.8541	310.988	0.821938	1022.45	0	869.422	863.655	1.01675	0	1.52926			0.553333	27.2536	1.333	1509.41	0.879042
167	2004	29004	8.05667	0.556667	9.55667	17.5636	27.9272	11.6147	12.6551	1.17543	999.976	1006.19	0.19822	4194.81	22.8608	311.565	0.821634	1023.97	0	870.801	865.029	1.01836	0	1.52926			0.556667	27.2449	1.333	1508.59	0.884071
168	2016	29016	8.06	0.56	9.56	17.5776	27.9575	11.6197	12.6617	1.17532	999.975	1006.19	0.19822	4194.81	22.8676	312.141	0.821331	1025.49	0	872.179	866.402	1.01997	0	1.52926			0.56	27.2361	1.333	1507.78	0.889097
169	2028	29028	8.06333	0.563333	9.56333	17.5916	27.9879	11.6247	12.6683	1.1752	999.974	1006.19	0.19822	4194.8	22.8744	312.717	0.82103	1027	0	873.557	867.775	1.02159	0	1.52926			0.563333	27.2273	1.333	1506.96	0.89412
170	2040	29040	8.06667	0.566667	9.56667	17.6055	28.0183	11.6297	12.675	1.17509	999.972	1006.19	0.19822	4194.8	22.8812	313.293	0.82073	1028.52	0	874.935	869.148	1.0232	0	1.52926			0.566667	27.2186	1.333	1506.15	0.899141
171	2052	29052	8.07	0.57	9.57	17.6195	28.0486	11.6347	12.6816	1.17497	999.971	1006.2	0.19822	4194.79	22.888	313.869	0.82043	1030.03	0	876.313	870.52	1.02481	0	1.52926			0.57	27.2098	1.333	1505.34	0.904158
172	2064	29064	8.07333	0.573333	9.57333	17.6335	28.079	11.6397	12.6883	1.17486	999.97	1006.2	0.19822	4194.79	22.8947	314.445	0.820132	1031.55	0	877.69	871.892	1.02642	0	1.52926			0.573333	27.2011	1.333	1504.52	0.909174
173	2076	29076	8.07667	0.576667	9.57667	17.6475	28.1094	11.6447	12.695	1.17474	999.969	1006.2	0.19822	4194.78	22.9015	315.02	0.819835	1033.06	0	879.067	873.264	1.02803	0	1.52926			0.576667	27.1923	1.333	1503.71	0.914186
174	2088	29088	8.08	0.58	9.58	17.6615	28.1398	11.6497	12.7016	1.17463	999.968	1006.2	0.19822	4194.78	22.9083	315.596	0.819539	1034.57	0	880.444	874.636	1.02964	0	1.52926			0.58	27.1836	1.333	1502.9	0.919196
175	2100	29100	8.08333	0.583333	9.58333	17.6755	28.1701	11.6548	12.7083	1.17451	999.966	1006.2	0.19822	4194.77	22.9151	316.171	0.819244	1036.08	0	881.821	876.007	1.03125	0	1.52926			0.583333	27.1749	1.333	1502.09	0.924203
176	2112	29112	8.08667	0.586667	9.58667	17.6895	28.2005	11.6598	12.715	1.1744	999.965	1006.2	0.19822	4194.77	22.9218	316.746	0.81895	1037.59	0	883.197	877.377	1.03286	0	1.52926			0.586667	27.1661	1.333	1501.28	0.929207
177	2124	29124	8.09	0.59	9.59	17.7035	28.2309	11.6649	12.7217	1.17428	999.964	1006.2	0.19822	4194.76	22.9286	317.32	0.818657	1039.11	0	884.572	878.748	1.03447	0	1.52926			0.59	27.1574	1.333	1500.47	0.934208
178	2136	29136	8.09333	0.593333	9.59333	17.7175	28.2612	11.6699	12.7284	1.17416	999.963	1006.2	0.19822	4194.76	22.9354	317.895	0.818365	1040.62	0	885.948	880.118	1.03608	0	1.52926			0.593333	27.1487	1.333	1499.66	0.939207
179	2148	29148	8.09667	0.596667	9.59667	17.7316	28.2916	11.675	12.7351	1.17405	999.962	1006.2	0.19822	4194.75	22.9422	318.469	0.818074	1042.12	0	887.323	881.488	1.03768	0	1.52926			0.596667	27.14	1.333	1498.85	0.944203
180	2160	29160	8.1	0.6	9.6	17.7456	28.322	11.6801	12.7418	1.17393	999.96	1006.2	0.19822	4194.74	22.9489	319.043	0.817784	1043.63	0	888.698	882.858	1.03929	0	1.52926			0.6	27.1313	1.333	1498.04	0.949197
181	2172	29172	8.10333	0.603333	9.60333	17.7596	28.3523	11.6851	12.7486	1.17382	999.959	1006.21	0.19822	4194.74	22.9557	319.617	0.817495	1045.14	0	890.072	884.227	1.0409	0	1.52926			0.603333	27.1226	1.333	1497.23	0.954188
182	2184	29184	8.10667	0.606667	9.60667	17.7736	28.3827	11.6902	12.7553	1.1737	999.958	1006.21	0.19822	4194.73	22.9625	320.19	0.817208	1046.65	0	891.446	885.596	1.04251	0	1.52926			0.606667	27.1139	1.333	1496.42	0.959176
183	2196	29196	8.11	0.61	9.61	17.7877	28.4131	11.6953	12.7621	1.17359	999.957	1006.21	0.19822	4194.73	22.9692	320.764	0.816921	1048.15	0	892.82	886.964	1.04411	0	1.52926			0.61	27.1052	1.333	1495.62	0.964161
184	2208	29208	8.11333	0.613333	9.61333	17.8017	28.4435	11.7004	12.7688	1.17347	999.956	1006.21	0.19822	4194.72	22.976	321.337	0.816635	1049.66	0	894.193	888.332	1.04572	0	1.52926			0.613333	27.0965	1.333	1494.81	0.969144
185	2220	29220	8.11667	0.616667	9.61667	17.8157	28.4738	11.7055	12.7756	1.17336	999.954	1006.21	0.19822	4194.72	22.9828	321.91	0.81635	1051.17	0	895.566	889.7	1.04732	0	1.52926			0.616667	27.0878	1.333	1494	0.974124
186	2232	29232	8.12	0.62	9.62	17.8298	28.5042	11.7107	12.7823	1.17324	999.953	1006.21	0.19822	4194.71	22.9896	322.483	0.816066	1052.67	0	896.939	891.068	1.04893	0	1.52926			0.62	27.0791	1.333	1493.2	0.979101
187	2244	29244	8.12333	0.623333	9.62333	17.8438	28.5346	11.7158	12.7891	1.17313	999.952	1006.21	0.19822	4194.71	22.9963	323.055	0.815784	1054.17	0	898.311	892.435	1.05054	0	1.52926			0.623333	27.0704	1.333	1492.39	0.984076
188	2256	29256	8.12667	0.626667	9.62667	17.8579	28.5649	11.7209	12.7959	1.17301	999.951	1006.21	0.19822	4194.7	23.0031	323.628	0.815502	1055.68	0	899.683	893.802	1.05214	0	1.52926			0.626667	27.0618	1.333	1491.59	0.989048
189	2268	29268	8.13	0.63	9.63	17.8719	28.5953	11.7261	12.8027	1.1729	999.949	1006.21	0.19822	4194.7	23.0098	324.2	0.815221	1057.18	0	901.055	895.168	1.05374	0	1.52926			0.63	27.0531	1.333	1490.78	0.994017
190	2280	29280	8.13333	0.633333	9.63333	17.886	28.6256	11.7312	12.8095	1.17278	999.948	1006.21	0.19822	4194.69	23.0166	324.772	0.814941	1058.68	0	902.426	896.534	1.05535	0	1.52926			0.633333	27.0444	1.333	1489.98	0.998984
191	2292	29292	8.13667	0.636667	9.63667	17.9	28.656	11.7364	12.8163	1.17267	999.947	1006.22	0.19822	4194.69	23.0234	325.344	0.814662	1060.18	0	903.797	897.9	1.05695	0	1.52926			0.636667	27.0358	1.333	1489.17	1.00395
192	2304	29304	8.14	0.64	9.64	17.9141	28.6864	11.7415	12.8231	1.17255	999.946	1006.22	0.19822	4194.68	23.0301	325.915	0.814384	1061.68	0	905.168	899.265	1.05855	0	1.52926			0.64	27.0271	1.333	1488.37	1.00891
193	2316	29316	8.14333	0.643333	9.64333	17.9282	28.7167	11.7467	12.8299	1.17244	999.944	1006.22	0.19822	4194.67	23.0369	326.487	0.814107	1063.18	0	906.538	900.63	1.06016	0	1.52926			0.643333	27.0185	1.333	1487.57	1.01387
194	2328	29328	8.14667	0.646667	9.64667	17.9422	28.7471	11.7519	12.8367	1.17233	999.943	1006.22	0.19822	4194.67	23.0436	327.058	0.813831	1064.68	0	907.908	901.995	1.06176	0	1.52926			0.646667	27.0098	1.333	1486.76	1.01882
195	2340	29340	8.15	0.65	9.65	17.9563	28.7775	11.7571	12.8435	1.17221	999.942	1006.22	0.19822	4194.66	23.0504	327.629	0.813556	1066.18	0	909.277	903.36	1.06336	0	1.52926			0.65	27.0012	1.333	1485.96	1.02378
196	2352	29352	8.15333	0.653333	9.65333	17.9704	28.8078	11.7623	12.8504	1.1721	999.941	1006.22	0.19822	4194.66	23.0572	328.199	0.813281	1067.67	0	910.647	904.724	1.06496	0	1.52926			0.653333	26.9925	1.333	1485.16	1.02873
197	2364	29364	8.15667	0.656667	9.65667	17.9845	28.8382	11.7675	12.8572	1.17198	999.939	1006.22	0.19822	4194.65	23.0639	328.77	0.813008	1069.17	0	912.015	906.087	1.06656	0	1.52926			0.656667	26.9839	1.333	1484.36	1.03367
198	2376	29376	8.16	0.66	9.66	17.9985	28.8685	11.7727	12.8641	1.17187	999.938	1006.22	0.19822	4194.65	23.0707	329.34	0.812736	1070.67	0	913.384	907.45	1.06816	0	1.52926			0.66	26.9753	1.333	1483.56	1.03862
199	2388	29388	8.16333	0.663333	9.66333	18.0126	28.8989	11.7779	12.8709	1.17175	999.937	1006.22	0.19822	4194.64	23.0774	329.91	0.812464	1072.16	0	914.752	908.813	1.06976	0	1.52926			0.663333	26.9667	1.333	1482.76	1.04356
200	2400	29400	8.16667	0.666667	9.66667	18.0267	28.9292	11.7831	12.8778	1.17164	999.936	1006.22	0.19822	4194.64	23.0842	330.48	0.812194	1073.65	0	916.119	910.176	1.07136	0	1.52926			0.666667	26.9581	1.333	1481.95	1.0485
201	2412	29412	8.17	0.67	9.67	18.0408	28.9596	11.7884	12.8847	1.17152	999.934	1006.23	0.19822	4194.63	23.0909	331.049	0.811924	1075.15	0	917.487	911.538	1.07296	0	1.52926			0.67	26.9494	1.333	1481.16	1.05344
202	2424	29424	8.17333	0.673333	9.67333	18.0549	28.99	11.7936	12.8916	1.17141	999.933	1006.23	0.19822	4194.63	23.0977	331.619	0.811656	1076.64	0	918.854	912.9	1.07456	0	1.52926			0.673333	26.9408	1.333	1480.36	1.05837
203	2436	29436	8.17667	0.676667	9.67667	18.069	29.0203	11.7989	12.8985	1.17129	999.932	1006.23	0.19822	4194.62	23.1044	332.188	0.811388	1078.13	0	920.22	914.261	1.07616	0	1.52926			0.676667	26.9322	1.333	1479.56	1.06331
204	2448	29448	8.18	0.68	9.68	18.0831	29.0507	11.8041	12.9053	1.17118	999.931	1006.23	0.19822	4194.61	23.1112	332.757	0.811121	1079.62	0	921.586	915.622	1.07775	0	1.52926			0.68	26.9236	1.333	1478.76	1.06824
205	2460	29460	8.18333	0.683333	9.68333	18.0972	29.081	11.8094	12.9123	1.17106	999.929	1006.23	0.19822	4194.61	23.1179	333.326	0.810855	1081.12	0	922.952	916.983	1.07935	0	1.52926			0.683333	26.915	1.333	1477.96	1.07316
206	2472	29472	8.18667	0.686667	9.68667	18.1113	29.1114	11.8147	12.9192	1.17095	999.928	1006.23	0.19822	4194.6	23.1247	333.894	0.81059	1082.6	0	924.318	918.343	1.08095	0	1.52926			0.686667	26.9064	1.333	1477.16	1.07809
207	2484	29484	8.19	0.69	9.69	18.1254	29.1417	11.8199	12.9261	1.17083	999.927	1006.23	0.19822	4194.6	23.1314	334.462	0.810326	1084.09	0	925.683	919.703	1.08254	0	1.52926			0.69	26.8979	1.333	1476.37	1.08301
208	2496	29496	8.19333	0.693333	9.69333	18.1395	29.172	11.8252	12.933	1.17072	999.926	1006.23	0.19822	4194.59	23.1382	335.031	0.810062	1085.58	0	927.047	921.063	1.08414	0	1.52926			0.693333	26.8893	1.333	1475.57	1.08793
209	2508	29508	8.19667	0.696667	9.69667	18.1537	29.2024	11.8305	12.9399	1.1706	999.924	1006.23	0.19822	4194.59	23.1449	335.598	0.8098	1087.07	0	928.412	922.422	1.08574	0	1.52926			0.696667	26.8807	1.333	1474.77	1.09284
210	2520	29520	8.2	0.7	9.7	18.1678	29.2327	11.8358	12.9469	1.17049	999.923	1006.23	0.19822	4194.58	23.1516	336.166	0.809538	1088.56	0	929.776	923.781	1.08733	0	1.52926			0.7	26.8721	1.333	1473.98	1.09775
211	2532	29532	8.20333	0.703333	9.70333	18.1819	29.2631	11.8411	12.9538	1.17038	999.922	1006.24	0.19822	4194.58	23.1584	336.733	0.809277	1090.04	0	931.139	925.139	1.08893	0	1.52926			0.703333	26.8636	1.333	1473.18	1.10267
212	2544	29544	8.20667	0.706667	9.70667	18.196	29.2934	11.8465	12.9608	1.17026	999.921	1006.24	0.19822	4194.57	23.1651	337.301	0.809018	1091.53	0	932.502	926.497	1.09052	0	1.52926			0.706667	26.855	1.333	1472.39	1.10757
213	2556	29556	8.21	0.71	9.71	18.2102	29.3238	11.8518	12.9677	1.17015	999.919	1006.24	0.19822	4194.57	23.1719	337.867	0.808759	1093.01	0	933.865	927.855	1.09211	0	1.52926			0.71	26.8465	1.333	1471.59	1.11248
214	2568	29568	8.21333	0.713333	9.71333	18.2243	29.3541	11.8571	12.9747	1.17003	999.918	1006.24	0.19822	4194.56	23.1786	338.434	0.8085	1094.5	0	935.227	929.212	1.09371	0	1.52926			0.713333	26.8379	1.333	1470.8	1.11738
215	2580	29580	8.21667	0.716667	9.71667	18.2385	29.3844	11.8625	12.9817	1.16992	999.917	1006.24	0.19822	4194.55	23.1853	339.001	0.808243	1095.98	0	936.589	930.569	1.0953	0	1.52926			0.716667	26.8294	1.333	1470	1.12228
216	2592	29592	8.22	0.72	9.72	18.2526	29.4148	11.8678	12.9887	1.1698	999.915	1006.24	0.19822	4194.55	23.1921	339.567	0.807987	1097.46	0	937.95	931.925	1.09689	0	1.52926			0.72	26.8208	1.333	1469.21	1.12718
217	2604	29604	8.22333	0.723333	9.72333	18.2667	29.4451	11.8732	12.9957	1.16969	999.914	1006.24	0.19822	4194.54	23.1988	340.133	0.807731	1098.94	0	939.312	933.281	1.09848	0	1.52926			0.723333	26.8123	1.333	1468.42	1.13207
218	2616	29616	8.22667	0.726667	9.72667	18.2809	29.4754	11.8786	13.0027	1.16957	999.913	1006.24	0.19822	4194.54	23.2055	340.699	0.807476	1100.42	0	940.672	934.637	1.10007	0	1.52926			0.726667	26.8037	1.333	1467.63	1.13697
219	2628	29628	8.23	0.73	9.73	18.295	29.5057	11.8839	13.0097	1.16946	999.912	1006.24	0.19822	4194.53	23.2123	341.264	0.807222	1101.9	0	942.033	935.992	1.10167	0	1.52926			0.73	26.7952	1.333	1466.83	1.14185
220	2640	29640	8.23333	0.733333	9.73333	18.3092	29.5361	11.8893	13.0167	1.16935	999.91	1006.24	0.19822	4194.53	23.219	341.83	0.806969	1103.38	0	943.392	937.347	1.10326	0	1.52926			0.733333	26.7867	1.333	1466.04	1.14674
221	2652	29652	8.23667	0.736667	9.73667	18.3234	29.5664	11.8947	13.0237	1.16923	999.909	1006.25	0.19822	4194.52	23.2257	342.395	0.806717	1104.86	0	944.752	938.701	1.10485	0	1.52926			0.736667	26.7782	1.333	1465.25	1.15163
222	2664	29664	8.24	0.74	9.74	18.3375	29.5967	11.9001	13.0307	1.16912	999.908	1006.25	0.19822	4194.51	23.2324	342.959	0.806465	1106.34	0	946.111	940.055	1.10643	0	1.52926			0.74	26.7697	1.333	1464.46	1.15651
223	2676	29676	8.24333	0.743333	9.74333	18.3517	29.627	11.9055	13.0378	1.169	999.906	1006.25	0.19822	4194.51	23.2392	343.524	0.806215	1107.82	0	947.47	941.409	1.10802	0	1.52926			0.743333	26.7612	1.333	1463.67	1.16139
224	2688	29688	8.24667	0.746667	9.74667	18.3658	29.6574	11.9109	13.0448	1.16889	999.905	1006.25	0.19822	4194.5	23.2459	344.088	0.805965	1109.29	0	948.828	942.762	1.10961	0	1.52926			0.746667	26.7526	1.333	1462.88	1.16626
225	2700	29700	8.25	0.75	9.75	18.38	29.6877	11.9163	13.0519	1.16878	999.904	1006.25	0.19822	4194.5	23.2526	344.653	0.805716	1110.77	0	950.186	944.114	1.1112	0	1.52926			0.75	26.7441	1.333	1462.09	1.17114
226	2712	29712	8.25333	0.753333	9.75333	18.3942	29.718	11.9218	13.0589	1.16866	999.902	1006.25	0.19822	4194.49	23.2593	345.217	0.805467	1112.24	0	951.543	945.467	1.11279	0	1.52926			0.753333	26.7357	1.333	1461.3	1.17601
227	2724	29724	8.25667	0.756667	9.75667	18.4084	29.7483	11.9272	13.066	1.16855	999.901	1006.25	0.19822	4194.49	23.2661	345.78	0.80522	1113.72	0	952.9	946.819	1.11437	0	1.52926			0.756667	26.7272	1.333	1460.51	1.18088
228	2736	29736	8.26	0.76	9.76	18.4225	29.7786	11.9326	13.0731	1.16843	999.9	1006.25	0.19822	4194.48	23.2728	346.344	0.804973	1115.19	0	954.256	948.17	1.11596	0	1.52926			0.76	26.7187	1.333	1459.73	1.18574
229	2748	29748	8.26333	0.763333	9.76333	18.4367	29.8089	11.9381	13.0801	1.16832	999.899	1006.25	0.19822	4194.48	23.2795	346.907	0.804727	1116.66	0	955.613	949.521	1.11755	0	1.52926			0.763333	26.7102	1.333	1458.94	1.1906
230	2760	29760	8.26667	0.766667	9.76667	18.4509	29.8392	11.9436	13.0872	1.1682	999.897	1006.25	0.19822	4194.47	23.2862	347.47	0.804482	1118.13	0	956.968	950.872	1.11913	0	1.52926			0.766667	26.7017	1.333	1458.15	1.19546
231	2772	29772	8.27	0.77	9.77	18.4651	29.8695	11.949	13.0943	1.16809	999.896	1006.26	0.19822	4194.46	23.2929	348.033	0.804238	1119.6	0	958.324	952.222	1.12072	0	1.52926			0.77	26.6932	1.333	1457.36	1.20032
232	2784	29784	8.27333	0.773333	9.77333	18.4793	29.8998	11.9545	13.1014	1.16798	999.895	1006.26	0.19822	4194.46	23.2997	348.595	0.803994	1121.07	0	959.678	953.572	1.1223	0	1.52926			0.773333	26.6848	1.333	1456.58	1.20518
233	2796	29796	8.27667	0.776667	9.77667	18.4935	29.9301	11.96	13.1085	1.16786	999.893	1006.26	0.19822	4194.45	23.3064	349.157	0.803752	1122.54	0	961.033	954.921	1.12389	0	1.52926			0.776667	26.6763	1.333	1455.79	1.21003
234	2808	29808	8.28	0.78	9.78	18.5077	29.9604	11.9655	13.1156	1.16775	999.892	1006.26	0.19822	4194.45	23.3131	349.719	0.80351	1124.01	0	962.387	956.27	1.12547	0	1.52926			0.78	26.6679	1.333	1455.01	1.21488
235	2820	29820	8.28333	0.783333	9.78333	18.5219	29.9907	11.971	13.1228	1.16763	999.891	1006.26	0.19822	4194.44	23.3198	350.281	0.803268	1125.48	0	963.74	957.619	1.12705	0	1.52926			0.783333	26.6594	1.333	1454.22	1.21973
236	2832	29832	8.28667	0.786667	9.78667	18.5361	30.021	11.9765	13.1299	1.16752	999.889	1006.26	0.19822	4194.44	23.3265	350.843	0.803028	1126.95	0	965.093	958.967	1.12863	0	1.52926			0.786667	26.6509	1.333	1453.44	1.22457
237	2844	29844	8.29	0.79	9.79	18.5503	30.0513	11.982	13.137	1.16741	999.888	1006.26	0.19822	4194.43	23.3332	351.404	0.802788	1128.41	0	966.446	960.315	1.13022	0	1.52926			0.79	26.6425	1.333	1452.65	1.22941
238	2856	29856	8.29333	0.793333	9.79333	18.5645	30.0816	11.9875	13.1442	1.16729	999.887	1006.26	0.19822	4194.42	23.3399	351.965	0.802549	1129.88	0	967.798	961.662	1.1318	0	1.52926			0.793333	26.6341	1.333	1451.87	1.23425
239	2868	29868	8.29667	0.796667	9.79667	18.5787	30.1119	11.993	13.1513	1.16718	999.885	1006.26	0.19822	4194.42	23.3466	352.526	0.802311	1131.34	0	969.15	963.008	1.13338	0	1.52926			0.796667	26.6256	1.333	1451.08	1.23909
240	2880	29880	8.3	0.8	9.8	18.5929	30.1422	11.9986	13.1585	1.16707	999.884	1006.26	0.19822	4194.41	23.3534	353.086	0.802074	1132.8	0	970.501	964.355	1.13496	0	1.52926			0.8	26.6172	1.333	1450.3	1.24393
241	2892	29892	8.30333	0.803333	9.80333	18.6071	30.1724	12.0041	13.1656	1.16695	999.883	1006.27	0.19822	4194.41	23.3601	353.646	0.801837	1134.27	0	971.852	965.701	1.13654	0	1.52926			0.803333	26.6088	1.333	1449.52	1.24876
242	2904	29904	8.30667	0.806667	9.80667	18.6213	30.2027	12.0097	13.1728	1.16684	999.881	1006.27	0.19822	4194.4	23.3668	354.206	0.801601	1135.73	0	973.203	967.046	1.13812	0	1.52926			0.806667	26.6003	1.333	1448.74	1.25359
243	2916	29916	8.31	0.81	9.81	18.6356	30.233	12.0152	13.18	1.16672	999.88	1006.27	0.19822	4194.4	23.3735	354.766	0.801366	1137.19	0	974.553	968.391	1.1397	0	1.52926			0.81	26.5919	1.333	1447.95	1.25841
244	2928	29928	8.31333	0.813333	9.81333	18.6498	30.2633	12.0208	13.1872	1.16661	999.879	1006.27	0.19822	4194.39	23.3802	355.326	0.801131	1138.65	0	975.902	969.736	1.14127	0	1.52926			0.813333	26.5835	1.333	1447.17	1.26324
245	2940	29940	8.31667	0.816667	9.81667	18.664	30.2935	12.0264	13.1944	1.1665	999.877	1006.27	0.19822	4194.38	23.3869	355.885	0.800897	1140.11	0	977.251	971.08	1.14285	0	1.52926			0.816667	26.5751	1.333	1446.39	1.26806
246	2952	29952	8.32	0.82	9.82	18.6782	30.3238	12.0319	13.2016	1.16638	999.876	1006.27	0.19822	4194.38	23.3936	356.444	0.800664	1141.57	0	978.6	972.423	1.14443	0	1.52926			0.82	26.5667	1.333	1445.61	1.27288
247	2964	29964	8.32333	0.823333	9.82333	18.6925	30.3541	12.0375	13.2088	1.16627	999.875	1006.27	0.19822	4194.37	23.4003	357.003	0.800432	1143.03	0	979.948	973.766	1.14601	0	1.52926			0.823333	26.5583	1.333	1444.83	1.27769
248	2976	29976	8.32667	0.826667	9.82667	18.7067	30.3843	12.0431	13.216	1.16616	999.873	1006.27	0.19822	4194.37	23.407	357.561	0.8002	1144.48	0	981.296	975.109	1.14758	0	1.52926			0.826667	26.5499	1.333	1444.05	1.28251
249	2988	29988	8.33	0.83	9.83	18.7209	30.4146	12.0487	13.2232	1.16604	999.872	1006.27	0.19822	4194.36	23.4137	358.12	0.799969	1145.94	0	982.643	976.451	1.14916	0	1.52926			0.83	26.5415	1.333	1443.27	1.28732
250	3000	30000	8.33333	0.833333	9.83333	18.7352	30.4448	12.0544	13.2304	1.16593	999.87	1006.28	0.19822	4194.35	23.4204	358.678	0.799739	1147.39	0	983.99	977.793	1.15073	0	1.52926			0.833333	26.5331	1.333	1442.49	1.29213
251	3012	30012	8.33667	0.836667	9.83667	18.7494	30.4751	12.06	13.2377	1.16582	999.869	1006.28	0.19822	4194.35	23.427	359.236	0.79951	1148.85	0	985.336	979.135	1.15231	0	1.52926			0.836667	26.5247	1.333	1441.72	1.29693
252	3024	30024	8.34	0.84	9.84	18.7637	30.5053	12.0656	13.2449	1.1657	999.868	1006.28	0.19822	4194.34	23.4337	359.793	0.799281	1150.3	0	986.682	980.475	1.15388	0	1.52926			0.84	26.5164	1.333	1440.94	1.30173
253	3036	30036	8.34333	0.843333	9.84333	18.7779	30.5356	12.0712	13.2522	1.16559	999.866	1006.28	0.19822	4194.34	23.4404	360.35	0.799053	1151.76	0	988.027	981.816	1.15545	0	1.52926			0.843333	26.508	1.333	1440.16	1.30654
254	3048	30048	8.34667	0.846667	9.84667	18.7922	30.5658	12.0769	13.2594	1.16548	999.865	1006.28	0.19822	4194.33	23.4471	360.907	0.798825	1153.21	0	989.372	983.156	1.15703	0	1.52926			0.846667	26.4996	1.333	1439.38	1.31133
255	3060	30060	8.35	0.85	9.85	18.8064	30.596	12.0825	13.2667	1.16536	999.864	1006.28	0.19822	4194.33	23.4538	361.464	0.798599	1154.66	0	990.716	984.495	1.1586	0	1.52926			0.85	26.4913	1.333	1438.61	1.31613
256	3072	30072	8.35333	0.853333	9.85333	18.8207	30.6263	12.0882	13.2739	1.16525	999.862	1006.28	0.19822	4194.32	23.4605	362.021	0.798373	1156.11	0	992.06	985.834	1.16017	0	1.52926			0.853333	26.4829	1.333	1437.83	1.32092
257	3084	30084	8.35667	0.856667	9.85667	18.8349	30.6565	12.0939	13.2812	1.16514	999.861	1006.28	0.19822	4194.31	23.4672	362.577	0.798147	1157.56	0	993.404	987.173	1.16174	0	1.52926			0.856667	26.4745	1.333	1437.05	1.32571
258	3096	30096	8.36	0.86	9.86	18.8492	30.6867	12.0995	13.2885	1.16502	999.86	1006.28	0.19822	4194.31	23.4739	363.133	0.797923	1159.01	0	994.747	988.511	1.16331	0	1.52926			0.86	26.4662	1.333	1436.28	1.3305
259	3108	30108	8.36333	0.863333	9.86333	18.8634	30.717	12.1052	13.2958	1.16491	999.858	1006.28	0.19822	4194.3	23.4805	363.689	0.797699	1160.46	0	996.089	989.848	1.16488	0	1.52926			0.863333	26.4579	1.333	1435.5	1.33528
260	3120	30120	8.36667	0.866667	9.86667	18.8777	30.7472	12.1109	13.3031	1.1648	999.857	1006.29	0.19822	4194.3	23.4872	364.244	0.797475	1161.9	0	997.431	991.185	1.16645	0	1.52926			0.866667	26.4495	1.333	1434.73	1.34007
261	3132	30132	8.37	0.87	9.87	18.892	30.7774	12.1166	13.3104	1.16468	999.855	1006.29	0.19822	4194.29	23.4939	364.799	0.797253	1163.35	0	998.773	992.522	1.16802	0	1.52926			0.87	26.4412	1.333	1433.96	1.34485
262	3144	30144	8.37333	0.873333	9.87333	18.9062	30.8076	12.1223	13.3177	1.16457	999.854	1006.29	0.19822	4194.28	23.5006	365.354	0.797031	1164.79	0	1000.11	993.858	1.16959	0	1.52926			0.873333	26.4328	1.333	1433.18	1.34962
263	3156	30156	8.37667	0.876667	9.87667	18.9205	30.8378	12.128	13.325	1.16446	999.853	1006.29	0.19822	4194.28	23.5073	365.909	0.79681	1166.24	0	1001.45	995.194	1.17116	0	1.52926			0.876667	26.4245	1.333	1432.41	1.3544
264	3168	30168	8.38	0.88	9.88	18.9348	30.868	12.1337	13.3324	1.16434	999.851	1006.29	0.19822	4194.27	23.5139	366.463	0.796589	1167.68	0	1002.79	996.529	1.17272	0	1.52926			0.88	26.4162	1.333	1431.64	1.35917
265	3180	30180	8.38333	0.883333	9.88333	18.9491	30.8982	12.1395	13.3397	1.16423	999.85	1006.29	0.19822	4194.27	23.5206	367.018	0.796369	1169.13	0	1004.13	997.864	1.17429	0	1.52926			0.883333	26.4079	1.333	1430.86	1.36394
266	3192	30192	8.38667	0.886667	9.88667	18.9633	30.9284	12.1452	13.347	1.16412	999.849	1006.29	0.19822	4194.26	23.5273	367.571	0.79615	1170.57	0	1005.47	999.198	1.17586	0	1.52926			0.886667	26.3996	1.333	1430.09	1.36871
267	3204	30204	8.39	0.89	9.89	18.9776	30.9586	12.1509	13.3544	1.164	999.847	1006.29	0.19822	4194.25	23.534	368.125	0.795931	1172.01	0	1006.81	1000.53	1.17742	0	1.52926			0.89	26.3913	1.333	1429.32	1.37347
268	3216	30216	8.39333	0.893333	9.89333	18.9919	30.9888	12.1567	13.3617	1.16389	999.846	1006.29	0.19822	4194.25	23.5406	368.678	0.795713	1173.45	0	1008.15	1001.86	1.17899	0	1.52926			0.893333	26.3829	1.333	1428.55	1.37823
269	3228	30228	8.39667	0.896667	9.89667	19.0062	31.019	12.1624	13.3691	1.16378	999.844	1006.3	0.19822	4194.24	23.5473	369.231	0.795496	1174.89	0	1009.49	1003.2	1.18055	0	1.52926			0.896667	26.3746	1.333	1427.78	1.38299
270	3240	30240	8.4	0.9	9.9	19.0205	31.0492	12.1682	13.3765	1.16366	999.843	1006.3	0.19822	4194.24	23.554	369.784	0.795279	1176.33	0	1010.82	1004.53	1.18211	0	1.52926			0.9	26.3664	1.333	1427.01	1.38775
271	3252	30252	8.40333	0.903333	9.90333	19.0348	31.0794	12.174	13.3838	1.16355	999.842	1006.3	0.19822	4194.23	23.5606	370.337	0.795063	1177.76	0	1012.16	1005.86	1.18368	0	1.52926			0.903333	26.3581	1.333	1426.24	1.3925
272	3264	30264	8.40667	0.906667	9.90667	19.0491	31.1096	12.1798	13.3912	1.16344	999.84	1006.3	0.19822	4194.23	23.5673	370.889	0.794847	1179.2	0	1013.5	1007.19	1.18524	0	1.52926			0.906667	26.3498	1.333	1425.47	1.39725
273	3276	30276	8.41	0.91	9.91	19.0633	31.1397	12.1855	13.3986	1.16333	999.839	1006.3	0.19822	4194.22	23.574	371.441	0.794633	1180.64	0	1014.83	1008.52	1.1868	0	1.52926			0.91	26.3415	1.333	1424.7	1.402
274	3288	30288	8.41333	0.913333	9.91333	19.0776	31.1699	12.1913	13.406	1.16321	999.837	1006.3	0.19822	4194.21	23.5806	371.993	0.794419	1182.07	0	1016.17	1009.85	1.18836	0	1.52926			0.913333	26.3332	1.333	1423.93	1.40675
275	3300	30300	8.41667	0.916667	9.91667	19.0919	31.2001	12.1971	13.4134	1.1631	999.836	1006.3	0.19822	4194.21	23.5873	372.544	0.794205	1183.51	0	1017.5	1011.18	1.18992	0	1.52926			0.916667	26.3249	1.333	1423.16	1.41149
276	3312	30312	8.42	0.92	9.92	19.1062	31.2302	12.203	13.4208	1.16299	999.835	1006.3	0.19822	4194.2	23.5939	373.096	0.793992	1184.94	0	1018.84	1012.51	1.19148	0	1.52926			0.92	26.3167	1.333	1422.39	1.41624
277	3324	30324	8.42333	0.923333	9.92333	19.1205	31.2604	12.2088	13.4282	1.16288	999.833	1006.3	0.19822	4194.2	23.6006	373.647	0.79378	1186.37	0	1020.17	1013.84	1.19304	0	1.52926			0.923333	26.3084	1.333	1421.63	1.42097
278	3336	30336	8.42667	0.926667	9.92667	19.1349	31.2906	12.2146	13.4357	1.16276	999.832	1006.3	0.19822	4194.19	23.6073	374.197	0.793568	1187.8	0	1021.5	1015.17	1.1946	0	1.52926			0.926667	26.3001	1.333	1420.86	1.42571
279	3348	30348	8.43	0.93	9.93	19.1492	31.3207	12.2204	13.4431	1.16265	999.83	1006.31	0.19822	4194.18	23.6139	374.748	0.793357	1189.24	0	1022.84	1016.5	1.19616	0	1.52926			0.93	26.2919	1.333	1420.09	1.43044
280	3360	30360	8.43333	0.933333	9.93333	19.1635	31.3509	12.2263	13.4505	1.16254	999.829	1006.31	0.19822	4194.18	23.6206	375.298	0.793147	1190.66	0	1024.17	1017.82	1.19772	0	1.52926			0.933333	26.2836	1.333	1419.33	1.43518
281	3372	30372	8.43667	0.936667	9.93667	19.1778	31.381	12.2321	13.458	1.16242	999.828	1006.31	0.19822	4194.17	23.6272	375.848	0.792937	1192.09	0	1025.5	1019.15	1.19927	0	1.52926			0.936667	26.2754	1.333	1418.56	1.4399
282	3384	30384	8.44	0.94	9.94	19.1921	31.4111	12.238	13.4654	1.16231	999.826	1006.31	0.19822	4194.17	23.6339	376.397	0.792728	1193.52	0	1026.83	1020.48	1.20083	0	1.52926			0.94	26.2672	1.333	1417.79	1.44463
283	3396	30396	8.44333	0.943333	9.94333	19.2064	31.4413	12.2438	13.4729	1.1622	999.825	1006.31	0.19822	4194.16	23.6405	376.947	0.792519	1194.95	0	1028.16	1021.8	1.20239	0	1.52926			0.943333	26.2589	1.333	1417.03	1.44935
284	3408	30408	8.44667	0.946667	9.94667	19.2207	31.4714	12.2497	13.4804	1.16209	999.823	1006.31	0.19822	4194.15	23.6472	377.496	0.792311	1196.38	0	1029.49	1023.13	1.20394	0	1.52926			0.946667	26.2507	1.333	1416.26	1.45407
285	3420	30420	8.45	0.95	9.95	19.235	31.5015	12.2556	13.4878	1.16197	999.822	1006.31	0.19822	4194.15	23.6538	378.044	0.792104	1197.8	0	1030.82	1024.45	1.2055	0	1.52926			0.95	26.2425	1.333	1415.5	1.45879
286	3432	30432	8.45333	0.953333	9.95333	19.2494	31.5316	12.2615	13.4953	1.16186	999.82	1006.31	0.19822	4194.14	23.6605	378.593	0.791897	1199.23	0	1032.15	1025.78	1.20705	0	1.52926			0.953333	26.2342	1.333	1414.74	1.46351
287	3444	30444	8.45667	0.956667	9.95667	19.2637	31.5618	12.2674	13.5028	1.16175	999.819	1006.31	0.19822	4194.13	23.6671	379.141	0.791691	1200.65	0	1033.48	1027.1	1.2086	0	1.52926			0.956667	26.226	1.333	1413.97	1.46822
288	3456	30456	8.46	0.96	9.96	19.278	31.5919	12.2733	13.5103	1.16164	999.818	1006.32	0.19822	4194.13	23.6738	379.689	0.791485	1202.07	0	1034.8	1028.42	1.21016	0	1.52926			0.96	26.2178	1.333	1413.21	1.47293
289	3468	30468	8.46333	0.963333	9.96333	19.2923	31.622	12.2792	13.5178	1.16153	999.816	1006.32	0.19822	4194.12	23.6804	380.237	0.79128	1203.49	0	1036.13	1029.74	1.21171	0	1.52926			0.963333	26.2096	1.333	1412.45	1.47764
290	3480	30480	8.46667	0.966667	9.96667	19.3067	31.6521	12.2851	13.5253	1.16141	999.815	1006.32	0.19822	4194.12	23.687	380.784	0.791076	1204.92	0	1037.46	1031.07	1.21326	0	1.52926			0.966667	26.2014	1.333	1411.69	1.48235
291	3492	30492	8.47	0.97	9.97	19.321	31.6822	12.291	13.5328	1.1613	999.813	1006.32	0.19822	4194.11	23.6937	381.331	0.790872	1206.34	0	1038.78	1032.39	1.21481	0	1.52926			0.97	26.1932	1.333	1410.92	1.48705
292	3504	30504	8.47333	0.973333	9.97333	19.3353	31.7123	12.2969	13.5403	1.16119	999.812	1006.32	0.19822	4194.1	23.7003	381.878	0.790669	1207.75	0	1040.11	1033.71	1.21636	0	1.52926			0.973333	26.185	1.333	1410.16	1.49175
293	3516	30516	8.47667	0.976667	9.97667	19.3497	31.7424	12.3029	13.5479	1.16108	999.81	1006.32	0.19822	4194.1	23.7069	382.424	0.790466	1209.17	0	1041.43	1035.03	1.21791	0	1.52926			0.976667	26.1768	1.333	1409.4	1.49645
294	3528	30528	8.48	0.98	9.98	19.364	31.7725	12.3088	13.5554	1.16096	999.809	1006.32	0.19822	4194.09	23.7136	382.971	0.790264	1210.59	0	1042.76	1036.35	1.21946	0	1.52926			0.98	26.1686	1.333	1408.64	1.50114
295	3540	30540	8.48333	0.983333	9.98333	19.3784	31.8025	12.3148	13.5629	1.16085	999.808	1006.32	0.19822	4194.09	23.7202	383.516	0.790062	1212.01	0	1044.08	1037.67	1.22101	0	1.52926			0.983333	26.1604	1.333	1407.88	1.50584
296	3552	30552	8.48667	0.986667	9.98667	19.3927	31.8326	12.3207	13.5705	1.16074	999.806	1006.32	0.19822	4194.08	23.7268	384.062	0.789861	1213.42	0	1045.41	1038.99	1.22256	0	1.52926			0.986667	26.1522	1.333	1407.12	1.51053
297	3564	30564	8.49	0.99	9.99	19.407	31.8627	12.3267	13.5781	1.16063	999.805	1006.32	0.19822	4194.07	23.7335	384.607	0.789661	1214.84	0	1046.73	1040.3	1.2241	0	1.52926			0.99	26.1441	1.333	1406.36	1.51521
298	3576	30576	8.49333	0.993333	9.99333	19.4214	31.8927	12.3327	13.5856	1.16052	999.803	1006.33	0.19822	4194.07	23.7401	385.153	0.789461	1216.25	0	1048.05	1041.62	1.22565	0	1.52926			0.993333	26.1359	1.333	1405.6	1.5199
299	3588	30588	8.49667	0.996667	9.99667	19.4357	31.9228	12.3387	13.5932	1.1604	999.802	1006.33	0.19822	4194.06	23.7467	385.697	0.789262	1217.66	0	1049.37	1042.94	1.2272	0	1.52926			0.996667	26.1277	1.333	1404.85	1.52458
300	3600	30600	8.5	1	10	19.4501	31.9529	12.3447	13.6008	1.16029	999.8	1006.33	0.19822	4194.06	23.7533	386.242	0.789063	1219.08	0	1050.69	1044.25	1.22874	0	1.52926			1	26.1196	1.333	1404.09	1.52926
301	3612	30612	8.50333	1.00333	10.0033	19.4644	31.9829	12.3507	13.6083	1.16018	999.799	1006.33	0.19822	4194.05	23.76	386.786	0.788865	1220.49	0	1052.01	1045.57	1.23028	0	1.52926
302	3624	30624	8.50667	1.00667	10.0067	19.4788	32.013	12.3567	13.6159	1.16007	999.797	1006.33	0.19822	4194.04	23.7666	387.33	0.788667	1221.9	0	1053.33	1046.89	1.23183	0	1.52926
303	3636	30636	8.51	1.01	10.01	19.4931	32.043	12.3627	13.6235	1.15996	999.796	1006.33	0.19822	4194.04	23.7732	387.874	0.78847	1223.31	0	1054.65	1048.2	1.23337	0	1.52926
304	3648	30648	8.51333	1.01333	10.0133	19.5075	32.073	12.3687	13.6311	1.15984	999.794	1006.33	0.19822	4194.03	23.7798	388.417	0.788274	1224.72	0	1055.97	1049.51	1.23491	0	1.52926
305	3660	30660	8.51667	1.01667	10.0167	19.5218	32.1031	12.3747	13.6387	1.15973	999.793	1006.33	0.19822	4194.02	23.7865	388.96	0.788078	1226.12	0	1057.29	1050.83	1.23646	0	1.52926
306	3672	30672	8.52	1.02	10.02	19.5362	32.1331	12.3808	13.6464	1.15962	999.791	1006.33	0.19822	4194.02	23.7931	389.503	0.787882	1227.53	0	1058.61	1052.14	1.238	0	1.52926
307	3684	30684	8.52333	1.02333	10.0233	19.5506	32.1631	12.3868	13.654	1.15951	999.79	1006.34	0.19822	4194.01	23.7997	390.045	0.787688	1228.94	0	1059.93	1053.45	1.23954	0	1.52926
308	3696	30696	8.52667	1.02667	10.0267	19.5649	32.1931	12.3929	13.6616	1.1594	999.789	1006.34	0.19822	4194.01	23.8063	390.588	0.787493	1230.34	0	1061.24	1054.77	1.24108	0	1.52926
309	3708	30708	8.53	1.03	10.03	19.5793	32.2232	12.3989	13.6693	1.15929	999.787	1006.34	0.19822	4194	23.8129	391.13	0.787299	1231.74	0	1062.56	1056.08	1.24262	0	1.52926
310	3720	30720	8.53333	1.03333	10.0333	19.5937	32.2532	12.405	13.6769	1.15917	999.786	1006.34	0.19822	4193.99	23.8195	391.671	0.787106	1233.15	0	1063.87	1057.39	1.24415	0	1.52926
311	3732	30732	8.53667	1.03667	10.0367	19.608	32.2832	12.4111	13.6845	1.15906	999.784	1006.34	0.19822	4193.99	23.8261	392.212	0.786913	1234.55	0	1065.19	1058.7	1.24569	0	1.52926
312	3744	30744	8.54	1.04	10.04	19.6224	32.3132	12.4171	13.6922	1.15895	999.783	1006.34	0.19822	4193.98	23.8327	392.754	0.786721	1235.95	0	1066.5	1060.01	1.24723	0	1.52926
313	3756	30756	8.54333	1.04333	10.0433	19.6368	32.3431	12.4232	13.6999	1.15884	999.781	1006.34	0.19822	4193.98	23.8393	393.294	0.78653	1237.35	0	1067.82	1061.32	1.24877	0	1.52926
314	3768	30768	8.54667	1.04667	10.0467	19.6511	32.3731	12.4293	13.7075	1.15873	999.78	1006.34	0.19822	4193.97	23.8459	393.835	0.786339	1238.75	0	1069.13	1062.62	1.2503	0	1.52926
315	3780	30780	8.55	1.05	10.05	19.6655	32.4031	12.4354	13.7152	1.15862	999.778	1006.34	0.19822	4193.96	23.8525	394.375	0.786148	1240.15	0	1070.44	1063.93	1.25184	0	1.52926
316	3792	30792	8.55333	1.05333	10.0533	19.6799	32.4331	12.4415	13.7229	1.1585	999.777	1006.35	0.19822	4193.96	23.8591	394.915	0.785958	1241.55	0	1071.76	1065.24	1.25337	0	1.52926
317	3804	30804	8.55667	1.05667	10.0567	19.6943	32.463	12.4476	13.7306	1.15839	999.775	1006.35	0.19822	4193.95	23.8657	395.454	0.785768	1242.94	0	1073.07	1066.55	1.2549	0	1.52926
318	3816	30816	8.56	1.06	10.06	19.7086	32.493	12.4538	13.7383	1.15828	999.774	1006.35	0.19822	4193.94	23.8723	395.993	0.785579	1244.34	0	1074.38	1067.85	1.25644	0	1.52926
319	3828	30828	8.56333	1.06333	10.0633	19.723	32.523	12.4599	13.746	1.15817	999.772	1006.35	0.19822	4193.94	23.8789	396.532	0.785391	1245.73	0	1075.69	1069.16	1.25797	0	1.52926
320	3840	30840	8.56667	1.06667	10.0667	19.7374	32.5529	12.466	13.7537	1.15806	999.771	1006.35	0.19822	4193.93	23.8855	397.071	0.785203	1247.12	0	1077	1070.46	1.2595	0	1.52926
321	3852	30852	8.57	1.07	10.07	19.7518	32.5829	12.4722	13.7614	1.15795	999.769	1006.35	0.19822	4193.93	23.8921	397.609	0.785015	1248.52	0	1078.31	1071.77	1.26103	0	1.52926
322	3864	30864	8.57333	1.07333	10.0733	19.7662	32.6128	12.4783	13.7692	1.15784	999.768	1006.35	0.19822	4193.92	23.8987	398.147	0.784828	1249.91	0	1079.61	1073.07	1.26256	0	1.52926
323	3876	30876	8.57667	1.07667	10.0767	19.7806	32.6427	12.4845	13.7769	1.15773	999.766	1006.35	0.19822	4193.91	23.9053	398.685	0.784642	1251.3	0	1080.92	1074.37	1.26409	0	1.52926
324	3888	30888	8.58	1.08	10.08	19.7949	32.6727	12.4907	13.7846	1.15762	999.765	1006.35	0.19822	4193.91	23.9119	399.223	0.784456	1252.69	0	1082.23	1075.68	1.26562	0	1.52926
325	3900	30900	8.58333	1.08333	10.0833	19.8093	32.7026	12.4969	13.7924	1.1575	999.763	1006.35	0.19822	4193.9	23.9185	399.76	0.78427	1254.08	0	1083.54	1076.98	1.26715	0	1.52926
326	3912	30912	8.58667	1.08667	10.0867	19.8237	32.7325	12.503	13.8001	1.15739	999.762	1006.36	0.19822	4193.89	23.925	400.297	0.784085	1255.47	0	1084.84	1078.28	1.26868	0	1.52926
327	3924	30924	8.59	1.09	10.09	19.8381	32.7624	12.5092	13.8079	1.15728	999.76	1006.36	0.19822	4193.89	23.9316	400.833	0.783901	1256.85	0	1086.15	1079.58	1.2702	0	1.52926
328	3936	30936	8.59333	1.09333	10.0933	19.8525	32.7923	12.5154	13.8156	1.15717	999.759	1006.36	0.19822	4193.88	23.9382	401.369	0.783717	1258.24	0	1087.45	1080.88	1.27173	0	1.52926
329	3948	30948	8.59667	1.09667	10.0967	19.8669	32.8222	12.5216	13.8234	1.15706	999.757	1006.36	0.19822	4193.87	23.9448	401.905	0.783533	1259.62	0	1088.76	1082.18	1.27325	0	1.52926
330	3960	30960	8.6	1.1	10.1	19.8813	32.8521	12.5279	13.8312	1.15695	999.756	1006.36	0.19822	4193.87	23.9514	402.441	0.78335	1261.01	0	1090.06	1083.48	1.27478	0	1.52926
331	3972	30972	8.60333	1.10333	10.1033	19.8957	32.882	12.5341	13.839	1.15684	999.754	1006.36	0.19822	4193.86	23.9579	402.976	0.783168	1262.39	0	1091.36	1084.78	1.2763	0	1.52926
332	3984	30984	8.60667	1.10667	10.1067	19.9101	32.9119	12.5403	13.8468	1.15673	999.753	1006.36	0.19822	4193.86	23.9645	403.511	0.782986	1263.77	0	1092.67	1086.08	1.27782	0	1.52926
333	3996	30996	8.61	1.11	10.11	19.9245	32.9418	12.5465	13.8546	1.15662	999.751	1006.36	0.19822	4193.85	23.9711	404.046	0.782804	1265.15	0	1093.97	1087.37	1.27935	0	1.52926
334	4008	31008	8.61333	1.11333	10.1133	19.9389	32.9716	12.5528	13.8624	1.15651	999.75	1006.36	0.19822	4193.84	23.9777	404.58	0.782623	1266.53	0	1095.27	1088.67	1.28087	0	1.52926
335	4020	31020	8.61667	1.11667	10.1167	19.9533	33.0015	12.559	13.8702	1.1564	999.748	1006.37	0.19822	4193.84	23.9842	405.114	0.782442	1267.91	0	1096.57	1089.97	1.28239	0	1.52926
336	4032	31032	8.62	1.12	10.12	19.9677	33.0313	12.5653	13.878	1.15628	999.747	1006.37	0.19822	4193.83	23.9908	405.648	0.782262	1269.29	0	1097.87	1091.26	1.28391	0	1.52926
337	4044	31044	8.62333	1.12333	10.1233	19.9821	33.0612	12.5716	13.8858	1.15617	999.745	1006.37	0.19822	4193.82	23.9974	406.181	0.782083	1270.67	0	1099.17	1092.56	1.28543	0	1.52926
338	4056	31056	8.62667	1.12667	10.1267	19.9965	33.091	12.5778	13.8937	1.15606	999.744	1006.37	0.19822	4193.82	24.0039	406.715	0.781903	1272.05	0	1100.47	1093.85	1.28695	0	1.52926
339	4068	31068	8.63	1.13	10.13	20.0109	33.1209	12.5841	13.9015	1.15595	999.742	1006.37	0.19822	4193.81	24.0105	407.247	0.781725	1273.42	0	1101.76	1095.14	1.28847	0	1.52926
340	4080	31080	8.63333	1.13333	10.1333	20.0253	33.1507	12.5904	13.9094	1.15584	999.74	1006.37	0.19822	4193.8	24.017	407.78	0.781547	1274.8	0	1103.06	1096.44	1.28998	0	1.52926
341	4092	31092	8.63667	1.13667	10.1367	20.0397	33.1805	12.5967	13.9172	1.15573	999.739	1006.37	0.19822	4193.8	24.0236	408.312	0.781369	1276.17	0	1104.36	1097.73	1.2915	0	1.52926
342	4104	31104	8.64	1.14	10.14	20.0541	33.2103	12.603	13.9251	1.15562	999.737	1006.37	0.19822	4193.79	24.0302	408.844	0.781191	1277.54	0	1105.66	1099.02	1.29301	0	1.52926
343	4116	31116	8.64333	1.14333	10.1433	20.0686	33.2402	12.6093	13.9329	1.15551	999.736	1006.37	0.19822	4193.79	24.0367	409.376	0.781015	1278.91	0	1106.95	1100.31	1.29453	0	1.52926
344	4128	31128	8.64667	1.14667	10.1467	20.083	33.27	12.6156	13.9408	1.1554	999.734	1006.38	0.19822	4193.78	24.0433	409.907	0.780838	1280.28	0	1108.25	1101.6	1.29604	0	1.52926
345	4140	31140	8.65	1.15	10.15	20.0974	33.2998	12.622	13.9487	1.15529	999.733	1006.38	0.19822	4193.77	24.0498	410.438	0.780662	1281.65	0	1109.54	1102.89	1.29756	0	1.52926
346	4152	31152	8.65333	1.15333	10.1533	20.1118	33.3296	12.6283	13.9566	1.15518	999.731	1006.38	0.19822	4193.77	24.0564	410.968	0.780487	1283.02	0	1110.83	1104.18	1.29907	0	1.52926
347	4164	31164	8.65667	1.15667	10.1567	20.1262	33.3593	12.6346	13.9645	1.15507	999.73	1006.38	0.19822	4193.76	24.0629	411.499	0.780312	1284.39	0	1112.13	1105.47	1.30058	0	1.52926
348	4176	31176	8.66	1.16	10.16	20.1406	33.3891	12.641	13.9723	1.15496	999.728	1006.38	0.19822	4193.75	24.0695	412.029	0.780137	1285.76	0	1113.42	1106.75	1.30209	0	1.52926
349	4188	31188	8.66333	1.16333	10.1633	20.155	33.4189	12.6473	13.9803	1.15485	999.727	1006.38	0.19822	4193.75	24.076	412.558	0.779963	1287.12	0	1114.71	1108.04	1.3036	0	1.52926
350	4200	31200	8.66667	1.16667	10.1667	20.1695	33.4487	12.6537	13.9882	1.15474	999.725	1006.38	0.19822	4193.74	24.0826	413.088	0.77979	1288.49	0	1116	1109.33	1.30511	0	1.52926
351	4212	31212	8.67	1.17	10.17	20.1839	33.4784	12.6601	13.9961	1.15463	999.723	1006.38	0.19822	4193.73	24.0891	413.617	0.779616	1289.85	0	1117.29	1110.61	1.30662	0	1.52926
352	4224	31224	8.67333	1.17333	10.1733	20.1983	33.5082	12.6664	14.004	1.15452	999.722	1006.38	0.19822	4193.73	24.0956	414.145	0.779444	1291.21	0	1118.58	1111.9	1.30813	0	1.52926
353	4236	31236	8.67667	1.17667	10.1767	20.2127	33.5379	12.6728	14.0119	1.15441	999.72	1006.39	0.19822	4193.72	24.1022	414.674	0.779271	1292.57	0	1119.87	1113.18	1.30964	0	1.52926
354	4248	31248	8.68	1.18	10.18	20.2271	33.5677	12.6792	14.0199	1.1543	999.719	1006.39	0.19822	4193.71	24.1087	415.202	0.779099	1293.93	0	1121.16	1114.47	1.31114	0	1.52926
355	4260	31260	8.68333	1.18333	10.1833	20.2416	33.5974	12.6856	14.0278	1.15419	999.717	1006.39	0.19822	4193.71	24.1152	415.73	0.778928	1295.29	0	1122.45	1115.75	1.31265	0	1.52926
356	4272	31272	8.68667	1.18667	10.1867	20.256	33.6271	12.692	14.0358	1.15408	999.716	1006.39	0.19822	4193.7	24.1218	416.257	0.778757	1296.65	0	1123.73	1117.03	1.31416	0	1.52926
357	4284	31284	8.69	1.19	10.19	20.2704	33.6568	12.6984	14.0437	1.15397	999.714	1006.39	0.19822	4193.7	24.1283	416.784	0.778587	1298.01	0	1125.02	1118.31	1.31566	0	1.52926
358	4296	31296	8.69333	1.19333	10.1933	20.2848	33.6865	12.7048	14.0517	1.15386	999.713	1006.39	0.19822	4193.69	24.1348	417.311	0.778416	1299.37	0	1126.3	1119.6	1.31716	0	1.52926
359	4308	31308	8.69667	1.19667	10.1967	20.2993	33.7162	12.7113	14.0597	1.15375	999.711	1006.39	0.19822	4193.68	24.1414	417.837	0.778247	1300.72	0	1127.59	1120.88	1.31867	0	1.52926
360	4320	31320	8.7	1.2	10.2	20.3137	33.7459	12.7177	14.0676	1.15364	999.709	1006.39	0.19822	4193.68	24.1479	418.364	0.778078	1302.08	0	1128.87	1122.16	1.32017	0	1.52926
361	4332	31332	8.70333	1.20333	10.2033	20.3281	33.7756	12.7241	14.0756	1.15353	999.708	1006.39	0.19822	4193.67	24.1544	418.889	0.777909	1303.43	0	1130.16	1123.44	1.32167	0	1.52926
362	4344	31344	8.70667	1.20667	10.2067	20.3426	33.8053	12.7306	14.0836	1.15342	999.706	1006.4	0.19822	4193.66	24.1609	419.415	0.77774	1304.78	0	1131.44	1124.71	1.32317	0	1.52926
363	4356	31356	8.71	1.21	10.21	20.357	33.835	12.737	14.0916	1.15331	999.705	1006.4	0.19822	4193.66	24.1675	419.94	0.777572	1306.13	0	1132.72	1125.99	1.32467	0	1.52926
364	4368	31368	8.71333	1.21333	10.2133	20.3714	33.8646	12.7435	14.0996	1.1532	999.703	1006.4	0.19822	4193.65	24.174	420.465	0.777405	1307.49	0	1134	1127.27	1.32617	0	1.52926
365	4380	31380	8.71667	1.21667	10.2167	20.3859	33.8943	12.75	14.1076	1.15309	999.701	1006.4	0.19822	4193.64	24.1805	420.989	0.777238	1308.83	0	1135.29	1128.55	1.32767	0	1.52926
366	4392	31392	8.72	1.22	10.22	20.4003	33.924	12.7565	14.1156	1.15298	999.7	1006.4	0.19822	4193.64	24.187	421.513	0.777071	1310.18	0	1136.57	1129.82	1.32916	0	1.52926
367	4404	31404	8.72333	1.22333	10.2233	20.4147	33.9536	12.7629	14.1236	1.15288	999.698	1006.4	0.19822	4193.63	24.1935	422.037	0.776905	1311.53	0	1137.85	1131.1	1.33066	0	1.52926
368	4416	31416	8.72667	1.22667	10.2267	20.4292	33.9832	12.7694	14.1317	1.15277	999.697	1006.4	0.19822	4193.62	24.2	422.561	0.776739	1312.88	0	1139.12	1132.37	1.33216	0	1.52926
369	4428	31428	8.73	1.23	10.23	20.4436	34.0129	12.7759	14.1397	1.15266	999.695	1006.4	0.19822	4193.62	24.2065	423.084	0.776573	1314.22	0	1140.4	1133.64	1.33365	0	1.52926
370	4440	31440	8.73333	1.23333	10.2333	20.458	34.0425	12.7824	14.1477	1.15255	999.694	1006.4	0.19822	4193.61	24.2131	423.607	0.776408	1315.57	0	1141.68	1134.92	1.33514	0	1.52926
371	4452	31452	8.73667	1.23667	10.2367	20.4725	34.0721	12.789	14.1558	1.15244	999.692	1006.41	0.19822	4193.6	24.2196	424.129	0.776244	1316.91	0	1142.96	1136.19	1.33664	0	1.52926
372	4464	31464	8.74	1.24	10.24	20.4869	34.1017	12.7955	14.1638	1.15233	999.69	1006.41	0.19822	4193.6	24.2261	424.651	0.77608	1318.25	0	1144.23	1137.46	1.33813	0	1.52926
373	4476	31476	8.74333	1.24333	10.2433	20.5013	34.1313	12.802	14.1719	1.15222	999.689	1006.41	0.19822	4193.59	24.2326	425.173	0.775916	1319.59	0	1145.51	1138.73	1.33962	0	1.52926
374	4488	31488	8.74667	1.24667	10.2467	20.5158	34.1609	12.8085	14.18	1.15211	999.687	1006.41	0.19822	4193.58	24.2391	425.695	0.775752	1320.93	0	1146.78	1140	1.34111	0	1.52926
375	4500	31500	8.75	1.25	10.25	20.5302	34.1905	12.8151	14.188	1.152	999.686	1006.41	0.19822	4193.58	24.2456	426.216	0.775589	1322.27	0	1148.06	1141.27	1.3426	0	1.52926
376	4512	31512	8.75333	1.25333	10.2533	20.5447	34.2201	12.8216	14.1961	1.15189	999.684	1006.41	0.19822	4193.57	24.2521	426.737	0.775427	1323.61	0	1149.33	1142.54	1.34409	0	1.52926
377	4524	31524	8.75667	1.25667	10.2567	20.5591	34.2496	12.8282	14.2042	1.15178	999.682	1006.41	0.19822	4193.56	24.2586	427.257	0.775265	1324.95	0	1150.6	1143.81	1.34558	0	1.52926
378	4536	31536	8.76	1.26	10.26	20.5735	34.2792	12.8348	14.2123	1.15168	999.681	1006.41	0.19822	4193.56	24.265	427.777	0.775103	1326.29	0	1151.88	1145.08	1.34707	0	1.52926
379	4548	31548	8.76333	1.26333	10.2633	20.588	34.3088	12.8413	14.2204	1.15157	999.679	1006.41	0.19822	4193.55	24.2715	428.297	0.774941	1327.62	0	1153.15	1146.35	1.34856	0	1.52926
380	4560	31560	8.76667	1.26667	10.2667	20.6024	34.3383	12.8479	14.2285	1.15146	999.677	1006.42	0.19822	4193.54	24.278	428.817	0.77478	1328.96	0	1154.42	1147.61	1.35004	0	1.52926
381	4572	31572	8.77	1.27	10.27	20.6169	34.3678	12.8545	14.2366	1.15135	999.676	1006.42	0.19822	4193.54	24.2845	429.336	0.77462	1330.29	0	1155.69	1148.88	1.35153	0	1.52926
382	4584	31584	8.77333	1.27333	10.2733	20.6313	34.3974	12.8611	14.2447	1.15124	999.674	1006.42	0.19822	4193.53	24.291	429.855	0.77446	1331.62	0	1156.96	1150.14	1.35301	0	1.52926
383	4596	31596	8.77667	1.27667	10.2767	20.6458	34.4269	12.8677	14.2529	1.15113	999.673	1006.42	0.19822	4193.52	24.2975	430.373	0.7743	1332.95	0	1158.23	1151.41	1.35449	0	1.52926
384	4608	31608	8.78	1.28	10.28	20.6602	34.4564	12.8743	14.261	1.15102	999.671	1006.42	0.19822	4193.52	24.304	430.891	0.77414	1334.28	0	1159.49	1152.67	1.35598	0	1.52926
385	4620	31620	8.78333	1.28333	10.2833	20.6746	34.4859	12.8809	14.2691	1.15091	999.669	1006.42	0.19822	4193.51	24.3104	431.409	0.773981	1335.61	0	1160.76	1153.93	1.35746	0	1.52926
386	4632	31632	8.78667	1.28667	10.2867	20.6891	34.5154	12.8875	14.2773	1.15081	999.668	1006.42	0.19822	4193.5	24.3169	431.927	0.773823	1336.94	0	1162.03	1155.19	1.35894	0	1.52926
387	4644	31644	8.79	1.29	10.29	20.7035	34.5449	12.8942	14.2854	1.1507	999.666	1006.42	0.19822	4193.5	24.3234	432.444	0.773665	1338.27	0	1163.29	1156.46	1.36042	0	1.52926
388	4656	31656	8.79333	1.29333	10.2933	20.718	34.5744	12.9008	14.2936	1.15059	999.664	1006.42	0.19822	4193.49	24.3299	432.96	0.773507	1339.59	0	1164.56	1157.72	1.3619	0	1.52926
389	4668	31668	8.79667	1.29667	10.2967	20.7324	34.6039	12.9074	14.3017	1.15048	999.663	1006.43	0.19822	4193.48	24.3363	433.477	0.773349	1340.92	0	1165.82	1158.98	1.36338	0	1.52926
390	4680	31680	8.8	1.3	10.3	20.7469	34.6333	12.9141	14.3099	1.15037	999.661	1006.43	0.19822	4193.48	24.3428	433.993	0.773192	1342.24	0	1167.09	1160.23	1.36485	0	1.52926
391	4692	31692	8.80333	1.30333	10.3033	20.7613	34.6628	12.9208	14.3181	1.15026	999.66	1006.43	0.19822	4193.47	24.3493	434.509	0.773035	1343.56	0	1168.35	1161.49	1.36633	0	1.52926
392	4704	31704	8.80667	1.30667	10.3067	20.7758	34.6922	12.9274	14.3263	1.15016	999.658	1006.43	0.19822	4193.46	24.3557	435.024	0.772879	1344.88	0	1169.61	1162.75	1.36781	0	1.52926
393	4716	31716	8.81	1.31	10.31	20.7902	34.7217	12.9341	14.3344	1.15005	999.656	1006.43	0.19822	4193.46	24.3622	435.539	0.772723	1346.2	0	1170.87	1164.01	1.36928	0	1.52926
394	4728	31728	8.81333	1.31333	10.3133	20.8047	34.7511	12.9408	14.3426	1.14994	999.655	1006.43	0.19822	4193.45	24.3687	436.054	0.772567	1347.52	0	1172.13	1165.26	1.37076	0	1.52926
395	4740	31740	8.81667	1.31667	10.3167	20.8191	34.7805	12.9475	14.3508	1.14983	999.653	1006.43	0.19822	4193.44	24.3751	436.568	0.772412	1348.84	0	1173.39	1166.52	1.37223	0	1.52926
396	4752	31752	8.82	1.32	10.32	20.8336	34.8099	12.9542	14.359	1.14972	999.651	1006.43	0.19822	4193.44	24.3816	437.082	0.772257	1350.16	0	1174.65	1167.77	1.3737	0	1.52926
397	4764	31764	8.82333	1.32333	10.3233	20.848	34.8393	12.9609	14.3673	1.14961	999.65	1006.43	0.19822	4193.43	24.388	437.596	0.772103	1351.48	0	1175.91	1169.03	1.37517	0	1.52926
398	4776	31776	8.82667	1.32667	10.3267	20.8625	34.8687	12.9676	14.3755	1.14951	999.648	1006.44	0.19822	4193.42	24.3945	438.109	0.771949	1352.79	0	1177.17	1170.28	1.37664	0	1.52926
399	4788	31788	8.83	1.33	10.33	20.8769	34.8981	12.9743	14.3837	1.1494	999.646	1006.44	0.19822	4193.42	24.4009	438.622	0.771795	1354.11	0	1178.42	1171.53	1.37811	0	1.52926
400	4800	31800	8.83333	1.33333	10.3333	20.8914	34.9275	12.981	14.3919	1.14929	999.645	1006.44	0.19822	4193.41	24.4074	439.135	0.771642	1355.42	0	1179.68	1172.79	1.37958	0	1.52926
401	4812	31812	8.83667	1.33667	10.3367	20.9058	34.9569	12.9877	14.4002	1.14918	999.643	1006.44	0.19822	4193.4	24.4138	439.647	0.771489	1356.73	0	1180.94	1174.04	1.38105	0	1.52926
402	4824	31824	8.84	1.34	10.34	20.9203	34.9863	12.9945	14.4084	1.14908	999.641	1006.44	0.19822	4193.4	24.4203	440.159	0.771336	1358.04	0	1182.19	1175.29	1.38252	0	1.52926
403	4836	31836	8.84333	1.34333	10.3433	20.9347	35.0156	13.0012	14.4167	1.14897	999.64	1006.44	0.19822	4193.39	24.4267	440.67	0.771184	1359.35	0	1183.44	1176.54	1.38399	0	1.52926
404	4848	31848	8.84667	1.34667	10.3467	20.9492	35.045	13.008	14.4249	1.14886	999.638	1006.44	0.19822	4193.38	24.4332	441.182	0.771032	1360.66	0	1184.7	1177.79	1.38545	0	1.52926
405	4860	31860	8.85	1.35	10.35	20.9636	35.0743	13.0147	14.4332	1.14875	999.636	1006.44	0.19822	4193.38	24.4396	441.692	0.77088	1361.97	0	1185.95	1179.03	1.38692	0	1.52926
406	4872	31872	8.85333	1.35333	10.3533	20.9781	35.1036	13.0215	14.4414	1.14864	999.635	1006.44	0.19822	4193.37	24.4461	442.203	0.770729	1363.27	0	1187.2	1180.28	1.38838	0	1.52926
407	4884	31884	8.85667	1.35667	10.3567	20.9925	35.1329	13.0283	14.4497	1.14854	999.633	1006.45	0.19822	4193.36	24.4525	442.713	0.770578	1364.58	0	1188.45	1181.53	1.38984	0	1.52926
408	4896	31896	8.86	1.36	10.36	21.007	35.1623	13.035	14.458	1.14843	999.631	1006.45	0.19822	4193.36	24.4589	443.223	0.770428	1365.88	0	1189.7	1182.77	1.3913	0	1.52926
409	4908	31908	8.86333	1.36333	10.3633	21.0214	35.1916	13.0418	14.4663	1.14832	999.63	1006.45	0.19822	4193.35	24.4654	443.732	0.770278	1367.19	0	1190.95	1184.02	1.39277	0	1.52926
410	4920	31920	8.86667	1.36667	10.3667	21.0359	35.2208	13.0486	14.4746	1.14821	999.628	1006.45	0.19822	4193.34	24.4718	444.241	0.770128	1368.49	0	1192.2	1185.26	1.39423	0	1.52926
411	4932	31932	8.87	1.37	10.37	21.0503	35.2501	13.0554	14.4829	1.14811	999.626	1006.45	0.19822	4193.34	24.4782	444.75	0.769978	1369.79	0	1193.45	1186.51	1.39569	0	1.52926
412	4944	31944	8.87333	1.37333	10.3733	21.0648	35.2794	13.0622	14.4912	1.148	999.625	1006.45	0.19822	4193.33	24.4846	445.258	0.769829	1371.09	0	1194.7	1187.75	1.39714	0	1.52926
413	4956	31956	8.87667	1.37667	10.3767	21.0792	35.3087	13.069	14.4995	1.14789	999.623	1006.45	0.19822	4193.32	24.4911	445.766	0.769681	1372.39	0	1195.94	1188.99	1.3986	0	1.52926
414	4968	31968	8.88	1.38	10.38	21.0937	35.3379	13.0759	14.5078	1.14779	999.621	1006.45	0.19822	4193.32	24.4975	446.274	0.769532	1373.69	0	1197.19	1190.23	1.40006	0	1.52926
415	4980	31980	8.88333	1.38333	10.3833	21.1081	35.3672	13.0827	14.5161	1.14768	999.62	1006.45	0.19822	4193.31	24.5039	446.781	0.769384	1374.99	0	1198.43	1191.47	1.40151	0	1.52926
416	4992	31992	8.88667	1.38667	10.3867	21.1226	35.3964	13.0895	14.5245	1.14757	999.618	1006.46	0.19822	4193.3	24.5103	447.288	0.769236	1376.28	0	1199.68	1192.71	1.40297	0	1.52926
417	5004	32004	8.89	1.39	10.39	21.1371	35.4256	13.0964	14.5328	1.14746	999.616	1006.46	0.19822	4193.3	24.5167	447.795	0.769089	1377.58	0	1200.92	1193.95	1.40442	0	1.52926
418	5016	32016	8.89333	1.39333	10.3933	21.1515	35.4549	13.1032	14.5411	1.14736	999.615	1006.46	0.19822	4193.29	24.5232	448.301	0.768942	1378.87	0	1202.16	1195.19	1.40588	0	1.52926
419	5028	32028	8.89667	1.39667	10.3967	21.166	35.4841	13.1101	14.5495	1.14725	999.613	1006.46	0.19822	4193.28	24.5296	448.807	0.768795	1380.16	0	1203.4	1196.43	1.40733	0	1.52926
420	5040	32040	8.9	1.4	10.4	21.1804	35.5133	13.1169	14.5578	1.14714	999.611	1006.46	0.19822	4193.28	24.536	449.312	0.768649	1381.45	0	1204.65	1197.67	1.40878	0	1.52926
421	5052	32052	8.90333	1.40333	10.4033	21.1949	35.5425	13.1238	14.5662	1.14704	999.61	1006.46	0.19822	4193.27	24.5424	449.818	0.768503	1382.74	0	1205.89	1198.9	1.41023	0	1.52926
422	5064	32064	8.90667	1.40667	10.4067	21.2093	35.5717	13.1307	14.5746	1.14693	999.608	1006.46	0.19822	4193.26	24.5488	450.322	0.768357	1384.03	0	1207.13	1200.14	1.41168	0	1.52926
423	5076	32076	8.91	1.41	10.41	21.2238	35.6008	13.1376	14.5829	1.14682	999.606	1006.46	0.19822	4193.25	24.5552	450.827	0.768212	1385.32	0	1208.36	1201.37	1.41313	0	1.52926
424	5088	32088	8.91333	1.41333	10.4133	21.2382	35.63	13.1445	14.5913	1.14672	999.604	1006.46	0.19822	4193.25	24.5616	451.331	0.768067	1386.61	0	1209.6	1202.61	1.41458	0	1.52926
425	5100	32100	8.91667	1.41667	10.4167	21.2527	35.6591	13.1514	14.5997	1.14661	999.603	1006.47	0.19822	4193.24	24.568	451.835	0.767922	1387.9	0	1210.84	1203.84	1.41602	0	1.52926
426	5112	32112	8.92	1.42	10.42	21.2671	35.6883	13.1583	14.6081	1.1465	999.601	1006.47	0.19822	4193.23	24.5744	452.338	0.767778	1389.18	0	1212.08	1205.07	1.41747	0	1.52926
427	5124	32124	8.92333	1.42333	10.4233	21.2816	35.7174	13.1652	14.6165	1.1464	999.599	1006.47	0.19822	4193.23	24.5808	452.841	0.767634	1390.46	0	1213.31	1206.3	1.41891	0	1.52926
428	5136	32136	8.92667	1.42667	10.4267	21.296	35.7466	13.1721	14.6249	1.14629	999.598	1006.47	0.19822	4193.22	24.5872	453.343	0.76749	1391.75	0	1214.55	1207.53	1.42036	0	1.52926
429	5148	32148	8.93	1.43	10.43	21.3105	35.7757	13.179	14.6333	1.14618	999.596	1006.47	0.19822	4193.21	24.5936	453.846	0.767347	1393.03	0	1215.78	1208.76	1.4218	0	1.52926
430	5160	32160	8.93333	1.43333	10.4333	21.3249	35.8048	13.186	14.6417	1.14608	999.594	1006.47	0.19822	4193.21	24.6	454.347	0.767204	1394.31	0	1217.01	1209.99	1.42324	0	1.52926
431	5172	32172	8.93667	1.43667	10.4367	21.3394	35.8339	13.1929	14.6501	1.14597	999.593	1006.47	0.19822	4193.2	24.6064	454.849	0.767061	1395.59	0	1218.25	1211.22	1.42468	0	1.52926
432	5184	32184	8.94	1.44	10.44	21.3538	35.863	13.1999	14.6586	1.14586	999.591	1006.47	0.19822	4193.19	24.6127	455.35	0.766919	1396.87	0	1219.48	1212.45	1.42612	0	1.52926
433	5196	32196	8.94333	1.44333	10.4433	21.3683	35.892	13.2068	14.667	1.14576	999.589	1006.47	0.19822	4193.19	24.6191	455.851	0.766777	1398.14	0	1220.71	1213.67	1.42756	0	1.52926
434	5208	32208	8.94667	1.44667	10.4467	21.3827	35.9211	13.2138	14.6754	1.14565	999.587	1006.48	0.19822	4193.18	24.6255	456.351	0.766635	1399.42	0	1221.94	1214.9	1.429	0	1.52926
435	5220	32220	8.95	1.45	10.45	21.3972	35.9502	13.2207	14.6839	1.14555	999.586	1006.48	0.19822	4193.17	24.6319	456.851	0.766494	1400.69	0	1223.17	1216.12	1.43044	0	1.52926
436	5232	32232	8.95333	1.45333	10.4533	21.4116	35.9792	13.2277	14.6923	1.14544	999.584	1006.48	0.19822	4193.17	24.6383	457.351	0.766353	1401.97	0	1224.4	1217.35	1.43188	0	1.52926
437	5244	32244	8.95667	1.45667	10.4567	21.4261	36.0082	13.2347	14.7008	1.14533	999.582	1006.48	0.19822	4193.16	24.6446	457.85	0.766212	1403.24	0	1225.62	1218.57	1.43331	0	1.52926
438	5256	32256	8.96	1.46	10.46	21.4405	36.0373	13.2417	14.7093	1.14523	999.58	1006.48	0.19822	4193.15	24.651	458.349	0.766071	1404.51	0	1226.85	1219.79	1.43475	0	1.52926
439	5268	32268	8.96333	1.46333	10.4633	21.455	36.0663	13.2487	14.7177	1.14512	999.579	1006.48	0.19822	4193.14	24.6574	458.847	0.765931	1405.78	0	1228.08	1221.02	1.43618	0	1.52926
440	5280	32280	8.96667	1.46667	10.4667	21.4694	36.0953	13.2557	14.7262	1.14502	999.577	1006.48	0.19822	4193.14	24.6637	459.345	0.765791	1407.05	0	1229.3	1222.24	1.43761	0	1.52926
441	5292	32292	8.97	1.47	10.47	21.4839	36.1243	13.2627	14.7347	1.14491	999.575	1006.48	0.19822	4193.13	24.6701	459.843	0.765652	1408.32	0	1230.53	1223.46	1.43904	0	1.52926
442	5304	32304	8.97333	1.47333	10.4733	21.4983	36.1533	13.2697	14.7432	1.1448	999.574	1006.48	0.19822	4193.12	24.6765	460.341	0.765513	1409.59	0	1231.75	1224.68	1.44048	0	1.52926
443	5316	32316	8.97667	1.47667	10.4767	21.5128	36.1823	13.2767	14.7517	1.1447	999.572	1006.49	0.19822	4193.12	24.6828	460.838	0.765374	1410.85	0	1232.97	1225.9	1.44191	0	1.52926
444	5328	32328	8.98	1.48	10.48	21.5272	36.2112	13.2838	14.7602	1.14459	999.57	1006.49	0.19822	4193.11	24.6892	461.334	0.765235	1412.12	0	1234.19	1227.11	1.44333	0	1.52926
445	5340	32340	8.98333	1.48333	10.4833	21.5416	36.2402	13.2908	14.7687	1.14449	999.568	1006.49	0.19822	4193.1	24.6955	461.831	0.765097	1413.38	0	1235.41	1228.33	1.44476	0	1.52926
446	5352	32352	8.98667	1.48667	10.4867	21.5561	36.2691	13.2979	14.7772	1.14438	999.567	1006.49	0.19822	4193.1	24.7019	462.326	0.764959	1414.64	0	1236.63	1229.55	1.44619	0	1.52926
447	5364	32364	8.99	1.49	10.49	21.5705	36.2981	13.3049	14.7857	1.14428	999.565	1006.49	0.19822	4193.09	24.7083	462.822	0.764821	1415.9	0	1237.85	1230.76	1.44762	0	1.52926
448	5376	32376	8.99333	1.49333	10.4933	21.585	36.327	13.312	14.7942	1.14417	999.563	1006.49	0.19822	4193.08	24.7146	463.317	0.764684	1417.16	0	1239.07	1231.98	1.44904	0	1.52926
449	5388	32388	8.99667	1.49667	10.4967	21.5994	36.3559	13.319	14.8027	1.14407	999.561	1006.49	0.19822	4193.07	24.721	463.812	0.764547	1418.42	0	1240.29	1233.19	1.45046	0	1.52926
450	5400	32400	9	1.5	10.5	21.6139	36.3848	13.3261	14.8113	1.14396	999.56	1006.49	0.19822	4193.07	24.7273	464.306	0.76441	1419.68	0	1241.51	1234.4	1.45189	0	1.52926
451	5412	32412	9.00333	1.50333	10.5033	21.6283	36.4137	13.3332	14.8198	1.14385	999.558	1006.49	0.19822	4193.06	24.7336	464.8	0.764274	1420.94	0	1242.72	1235.61	1.45331	0	1.52926
452	5424	32424	9.00667	1.50667	10.5067	21.6428	36.4426	13.3403	14.8284	1.14375	999.556	1006.5	0.19822	4193.05	24.74	465.294	0.764138	1422.19	0	1243.94	1236.83	1.45473	0	1.52926
453	5436	32436	9.01	1.51	10.51	21.6572	36.4715	13.3474	14.8369	1.14364	999.554	1006.5	0.19822	4193.05	24.7463	465.787	0.764002	1423.45	0	1245.15	1238.04	1.45615	0	1.52926
454	5448	32448	9.01333	1.51333	10.5133	21.6716	36.5003	13.3545	14.8455	1.14354	999.553	1006.5	0.19822	4193.04	24.7527	466.28	0.763866	1424.7	0	1246.37	1239.25	1.45757	0	1.52926
455	5460	32460	9.01667	1.51667	10.5167	21.6861	36.5292	13.3616	14.854	1.14343	999.551	1006.5	0.19822	4193.03	24.759	466.772	0.763731	1425.95	0	1247.58	1240.45	1.45899	0	1.52926
456	5472	32472	9.02	1.52	10.52	21.7005	36.558	13.3687	14.8626	1.14333	999.549	1006.5	0.19822	4193.03	24.7653	467.264	0.763596	1427.21	0	1248.79	1241.66	1.46041	0	1.52926
457	5484	32484	9.02333	1.52333	10.5233	21.715	36.5869	13.3758	14.8712	1.14322	999.547	1006.5	0.19822	4193.02	24.7717	467.756	0.763461	1428.46	0	1250	1242.87	1.46182	0	1.52926
458	5496	32496	9.02667	1.52667	10.5267	21.7294	36.6157	13.3829	14.8798	1.14312	999.545	1006.5	0.19822	4193.01	24.778	468.247	0.763327	1429.7	0	1251.21	1244.08	1.46324	0	1.52926
459	5508	32508	9.03	1.53	10.53	21.7438	36.6445	13.3901	14.8884	1.14301	999.544	1006.5	0.19822	4193	24.7843	468.738	0.763193	1430.95	0	1252.42	1245.28	1.46465	0	1.52926
460	5520	32520	9.03333	1.53333	10.5333	21.7583	36.6733	13.3972	14.8969	1.14291	999.542	1006.5	0.19822	4193	24.7906	469.229	0.763059	1432.2	0	1253.63	1246.48	1.46607	0	1.52926
461	5532	32532	9.03667	1.53667	10.5367	21.7727	36.7021	13.4044	14.9055	1.1428	999.54	1006.51	0.19822	4192.99	24.797	469.719	0.762926	1433.44	0	1254.84	1247.69	1.46748	0	1.52926
462	5544	32544	9.04	1.54	10.54	21.7871	36.7309	13.4115	14.9142	1.1427	999.538	1006.51	0.19822	4192.98	24.8033	470.209	0.762792	1434.69	0	1256.04	1248.89	1.46889	0	1.52926
463	5556	32556	9.04333	1.54333	10.5433	21.8016	36.7596	13.4187	14.9228	1.1426	999.537	1006.51	0.19822	4192.98	24.8096	470.698	0.76266	1435.93	0	1257.25	1250.09	1.4703	0	1.52926
464	5568	32568	9.04667	1.54667	10.5467	21.816	36.7884	13.4258	14.9314	1.14249	999.535	1006.51	0.19822	4192.97	24.8159	471.187	0.762527	1437.17	0	1258.46	1251.29	1.47171	0	1.52926
465	5580	32580	9.05	1.55	10.55	21.8304	36.8171	13.433	14.94	1.14239	999.533	1006.51	0.19822	4192.96	24.8222	471.676	0.762395	1438.41	0	1259.66	1252.49	1.47312	0	1.52926
466	5592	32592	9.05333	1.55333	10.5533	21.8449	36.8459	13.4402	14.9486	1.14228	999.531	1006.51	0.19822	4192.96	24.8285	472.164	0.762262	1439.65	0	1260.86	1253.69	1.47452	0	1.52926
467	5604	32604	9.05667	1.55667	10.5567	21.8593	36.8746	13.4474	14.9573	1.14218	999.529	1006.51	0.19822	4192.95	24.8348	472.652	0.762131	1440.89	0	1262.07	1254.89	1.47593	0	1.52926
468	5616	32616	9.06	1.56	10.56	21.8737	36.9033	13.4546	14.9659	1.14207	999.528	1006.51	0.19822	4192.94	24.8411	473.14	0.761999	1442.13	0	1263.27	1256.09	1.47734	0	1.52926
469	5628	32628	9.06333	1.56333	10.5633	21.8882	36.932	13.4618	14.9745	1.14197	999.526	1006.51	0.19822	4192.93	24.8474	473.627	0.761868	1443.36	0	1264.47	1257.29	1.47874	0	1.52926
470	5640	32640	9.06667	1.56667	10.5667	21.9026	36.9607	13.469	14.9832	1.14186	999.524	1006.52	0.19822	4192.93	24.8537	474.113	0.761737	1444.6	0	1265.67	1258.48	1.48014	0	1.52926
471	5652	32652	9.07	1.57	10.57	21.917	36.9894	13.4762	14.9919	1.14176	999.522	1006.52	0.19822	4192.92	24.86	474.6	0.761606	1445.83	0	1266.87	1259.68	1.48155	0	1.52926
472	5664	32664	9.07333	1.57333	10.5733	21.9315	37.018	13.4834	15.0005	1.14166	999.521	1006.52	0.19822	4192.91	24.8663	475.085	0.761476	1447.06	0	1268.07	1260.87	1.48295	0	1.52926
473	5676	32676	9.07667	1.57667	10.5767	21.9459	37.0467	13.4907	15.0092	1.14155	999.519	1006.52	0.19822	4192.91	24.8726	475.571	0.761346	1448.3	0	1269.26	1262.07	1.48435	0	1.52926
474	5688	32688	9.08	1.58	10.58	21.9603	37.0753	13.4979	15.0179	1.14145	999.517	1006.52	0.19822	4192.9	24.8789	476.056	0.761216	1449.53	0	1270.46	1263.26	1.48575	0	1.52926
475	5700	32700	9.08333	1.58333	10.5833	21.9747	37.104	13.5052	15.0265	1.14134	999.515	1006.52	0.19822	4192.89	24.8852	476.541	0.761087	1450.76	0	1271.66	1264.45	1.48715	0	1.52926
476	5712	32712	9.08667	1.58667	10.5867	21.9892	37.1326	13.5124	15.0352	1.14124	999.513	1006.52	0.19822	4192.88	24.8915	477.025	0.760957	1451.98	0	1272.85	1265.64	1.48854	0	1.52926
477	5724	32724	9.09	1.59	10.59	22.0036	37.1612	13.5197	15.0439	1.14114	999.512	1006.52	0.19822	4192.88	24.8978	477.509	0.760828	1453.21	0	1274.04	1266.83	1.48994	0	1.52926
478	5736	32736	9.09333	1.59333	10.5933	22.018	37.1898	13.5269	15.0526	1.14103	999.51	1006.53	0.19822	4192.87	24.9041	477.993	0.7607	1454.44	0	1275.24	1268.02	1.49133	0	1.52926
479	5748	32748	9.09667	1.59667	10.5967	22.0324	37.2184	13.5342	15.0613	1.14093	999.508	1006.53	0.19822	4192.86	24.9104	478.476	0.760571	1455.66	0	1276.43	1269.21	1.49273	0	1.52926
480	5760	32760	9.1	1.6	10.6	22.0469	37.247	13.5415	15.07	1.14082	999.506	1006.53	0.19822	4192.86	24.9166	478.959	0.760443	1456.88	0	1277.62	1270.4	1.49412	0	1.52926
481	5772	32772	9.10333	1.60333	10.6033	22.0613	37.2755	13.5488	15.0787	1.14072	999.504	1006.53	0.19822	4192.85	24.9229	479.441	0.760315	1458.1	0	1278.81	1271.58	1.49551	0	1.52926
482	5784	32784	9.10667	1.60667	10.6067	22.0757	37.3041	13.556	15.0875	1.14062	999.502	1006.53	0.19822	4192.84	24.9292	479.923	0.760187	1459.33	0	1280	1272.77	1.4969	0	1.52926
483	5796	32796	9.11	1.61	10.61	22.0901	37.3326	13.5633	15.0962	1.14051	999.501	1006.53	0.19822	4192.83	24.9355	480.404	0.76006	1460.54	0	1281.19	1273.95	1.49829	0	1.52926
484	5808	32808	9.11333	1.61333	10.6133	22.1045	37.3612	13.5707	15.1049	1.14041	999.499	1006.53	0.19822	4192.83	24.9417	480.886	0.759933	1461.76	0	1282.38	1275.14	1.49968	0	1.52926
485	5820	32820	9.11667	1.61667	10.6167	22.1189	37.3897	13.578	15.1137	1.14031	999.497	1006.53	0.19822	4192.82	24.948	481.366	0.759806	1462.98	0	1283.56	1276.32	1.50107	0	1.52926
486	5832	32832	9.12	1.62	10.62	22.1334	37.4182	13.5853	15.1224	1.1402	999.495	1006.53	0.19822	4192.81	24.9542	481.847	0.759679	1464.2	0	1284.75	1277.5	1.50246	0	1.52926
487	5844	32844	9.12333	1.62333	10.6233	22.1478	37.4467	13.5926	15.1312	1.1401	999.493	1006.54	0.19822	4192.81	24.9605	482.327	0.759553	1465.41	0	1285.94	1278.68	1.50384	0	1.52926
488	5856	32856	9.12667	1.62667	10.6267	22.1622	37.4752	13.5999	15.1399	1.14	999.492	1006.54	0.19822	4192.8	24.9668	482.806	0.759427	1466.62	0	1287.12	1279.86	1.50523	0	1.52926
489	5868	32868	9.13	1.63	10.63	22.1766	37.5036	13.6073	15.1487	1.13989	999.49	1006.54	0.19822	4192.79	24.973	483.285	0.759301	1467.84	0	1288.3	1281.04	1.50661	0	1.52926
490	5880	32880	9.13333	1.63333	10.6333	22.191	37.5321	13.6146	15.1574	1.13979	999.488	1006.54	0.19822	4192.78	24.9793	483.764	0.759176	1469.05	0	1289.48	1282.22	1.508	0	1.52926
491	5892	32892	9.13667	1.63667	10.6367	22.2054	37.5605	13.622	15.1662	1.13969	999.486	1006.54	0.19822	4192.78	24.9855	484.242	0.759051	1470.26	0	1290.67	1283.4	1.50938	0	1.52926
492	5904	32904	9.14	1.64	10.64	22.2198	37.589	13.6293	15.175	1.13958	999.484	1006.54	0.19822	4192.77	24.9918	484.72	0.758926	1471.47	0	1291.85	1284.57	1.51076	0	1.52926
493	5916	32916	9.14333	1.64333	10.6433	22.2342	37.6174	13.6367	15.1838	1.13948	999.482	1006.54	0.19822	4192.76	24.998	485.198	0.758801	1472.67	0	1293.03	1285.75	1.51214	0	1.52926
494	5928	32928	9.14667	1.64667	10.6467	22.2486	37.6458	13.6441	15.1925	1.13938	999.481	1006.54	0.19822	4192.76	25.0043	485.675	0.758676	1473.88	0	1294.21	1286.93	1.51352	0	1.52926
495	5940	32940	9.15	1.65	10.65	22.263	37.6742	13.6514	15.2013	1.13928	999.479	1006.54	0.19822	4192.75	25.0105	486.152	0.758552	1475.09	0	1295.38	1288.1	1.51489	0	1.52926
496	5952	32952	9.15333	1.65333	10.6533	22.2774	37.7026	13.6588	15.2101	1.13917	999.477	1006.55	0.19822	4192.74	25.0168	486.628	0.758428	1476.29	0	1296.56	1289.27	1.51627	0	1.52926
497	5964	32964	9.15667	1.65667	10.6567	22.2918	37.731	13.6662	15.2189	1.13907	999.475	1006.55	0.19822	4192.73	25.023	487.104	0.758304	1477.49	0	1297.74	1290.44	1.51764	0	1.52926
498	5976	32976	9.16	1.66	10.66	22.3062	37.7593	13.6736	15.2278	1.13897	999.473	1006.55	0.19822	4192.73	25.0292	487.58	0.758181	1478.69	0	1298.91	1291.62	1.51902	0	1.52926
499	5988	32988	9.16333	1.66333	10.6633	22.3206	37.7877	13.681	15.2366	1.13886	999.471	1006.55	0.19822	4192.72	25.0355	488.055	0.758058	1479.9	0	1300.09	1292.79	1.52039	0	1.52926
500	6000	33000	9.16667	1.66667	10.6667	22.335	37.816	13.6884	15.2454	1.13876	999.469	1006.55	0.19822	4192.71	25.0417	488.53	0.757935	1481.09	0	1301.26	1293.96	1.52176	0	1.52926
501	6012	33012	9.17	1.67	10.67	22.3494	37.8444	13.6959	15.2542	1.13866	999.468	1006.55	0.19822	4192.7	25.0479	489.004	0.757812	1482.29	0	1302.43	1295.12	1.52314	0	1.52926
502	6024	33024	9.17333	1.67333	10.6733	22.3638	37.8727	13.7033	15.2631	1.13856	999.466	1006.55	0.19822	4192.7	25.0541	489.478	0.75769	1483.49	0	1303.6	1296.29	1.52451	0	1.52926
503	6036	33036	9.17667	1.67667	10.6767	22.3782	37.901	13.7107	15.2719	1.13845	999.464	1006.55	0.19822	4192.69	25.0604	489.951	0.757567	1484.68	0	1304.77	1297.46	1.52587	0	1.52926
504	6048	33048	9.18	1.68	10.68	22.3926	37.9293	13.7181	15.2807	1.13835	999.462	1006.55	0.19822	4192.68	25.0666	490.424	0.757445	1485.88	0	1305.94	1298.62	1.52724	0	1.52926
505	6060	33060	9.18333	1.68333	10.6833	22.407	37.9575	13.7256	15.2896	1.13825	999.46	1006.56	0.19822	4192.68	25.0728	490.897	0.757324	1487.07	0	1307.11	1299.79	1.52861	0	1.52926
506	6072	33072	9.18667	1.68667	10.6867	22.4214	37.9858	13.733	15.2984	1.13815	999.458	1006.56	0.19822	4192.67	25.079	491.369	0.757202	1488.26	0	1308.28	1300.95	1.52997	0	1.52926
507	6084	33084	9.19	1.69	10.69	22.4358	38.0141	13.7405	15.3073	1.13805	999.456	1006.56	0.19822	4192.66	25.0852	491.841	0.757081	1489.45	0	1309.45	1302.12	1.53134	0	1.52926
508	6096	33096	9.19333	1.69333	10.6933	22.4502	38.0423	13.748	15.3162	1.13794	999.455	1006.56	0.19822	4192.65	25.0914	492.313	0.75696	1490.64	0	1310.61	1303.28	1.5327	0	1.52926
509	6108	33108	9.19667	1.69667	10.6967	22.4646	38.0705	13.7554	15.325	1.13784	999.453	1006.56	0.19822	4192.65	25.0977	492.784	0.756839	1491.83	0	1311.78	1304.44	1.53406	0	1.52926
510	6120	33120	9.2	1.7	10.7	22.479	38.0987	13.7629	15.3339	1.13774	999.451	1006.56	0.19822	4192.64	25.1039	493.254	0.756719	1493.02	0	1312.94	1305.6	1.53543	0	1.52926
511	6132	33132	9.20333	1.70333	10.7033	22.4933	38.1269	13.7704	15.3428	1.13764	999.449	1006.56	0.19822	4192.63	25.1101	493.725	0.756599	1494.21	0	1314.1	1306.76	1.53679	0	1.52926
512	6144	33144	9.20667	1.70667	10.7067	22.5077	38.1551	13.7779	15.3517	1.13754	999.447	1006.56	0.19822	4192.63	25.1163	494.194	0.756479	1495.39	0	1315.27	1307.92	1.53815	0	1.52926
513	6156	33156	9.21	1.71	10.71	22.5221	38.1833	13.7854	15.3606	1.13743	999.445	1006.57	0.19822	4192.62	25.1225	494.664	0.756359	1496.57	0	1316.43	1309.08	1.5395	0	1.52926
514	6168	33168	9.21333	1.71333	10.7133	22.5365	38.2115	13.7929	15.3695	1.13733	999.443	1006.57	0.19822	4192.61	25.1287	495.133	0.756239	1497.76	0	1317.59	1310.23	1.54086	0	1.52926
515	6180	33180	9.21667	1.71667	10.7167	22.5509	38.2396	13.8004	15.3784	1.13723	999.441	1006.57	0.19822	4192.6	25.1349	495.601	0.75612	1498.94	0	1318.75	1311.39	1.54222	0	1.52926
516	6192	33192	9.22	1.72	10.72	22.5652	38.2678	13.8079	15.3873	1.13713	999.44	1006.57	0.19822	4192.6	25.141	496.07	0.756001	1500.12	0	1319.91	1312.54	1.54357	0	1.52926
517	6204	33204	9.22333	1.72333	10.7233	22.5796	38.2959	13.8154	15.3962	1.13703	999.438	1006.57	0.19822	4192.59	25.1472	496.537	0.755882	1501.29	0	1321.06	1313.7	1.54492	0	1.52926
518	6216	33216	9.22667	1.72667	10.7267	22.594	38.324	13.823	15.4051	1.13693	999.436	1006.57	0.19822	4192.58	25.1534	497.005	0.755764	1502.47	0	1322.22	1314.85	1.54628	0	1.52926
519	6228	33228	9.23	1.73	10.73	22.6084	38.3521	13.8305	15.414	1.13682	999.434	1006.57	0.19822	4192.57	25.1596	497.471	0.755645	1503.65	0	1323.38	1316	1.54763	0	1.52926
520	6240	33240	9.23333	1.73333	10.7333	22.6227	38.3802	13.8381	15.423	1.13672	999.432	1006.57	0.19822	4192.57	25.1658	497.938	0.755527	1504.82	0	1324.53	1317.15	1.54898	0	1.52926
521	6252	33252	9.23667	1.73667	10.7367	22.6371	38.4083	13.8456	15.4319	1.13662	999.43	1006.57	0.19822	4192.56	25.172	498.404	0.755409	1506	0	1325.68	1318.3	1.55033	0	1.52926
522	6264	33264	9.24	1.74	10.74	22.6515	38.4363	13.8532	15.4409	1.13652	999.428	1006.58	0.19822	4192.55	25.1781	498.87	0.755292	1507.17	0	1326.84	1319.45	1.55168	0	1.52926
523	6276	33276	9.24333	1.74333	10.7433	22.6658	38.4644	13.8607	15.4498	1.13642	999.426	1006.58	0.19822	4192.54	25.1843	499.335	0.755174	1508.34	0	1327.99	1320.6	1.55302	0	1.52926
524	6288	33288	9.24667	1.74667	10.7467	22.6802	38.4924	13.8683	15.4588	1.13632	999.424	1006.58	0.19822	4192.54	25.1905	499.8	0.755057	1509.51	0	1329.14	1321.75	1.55437	0	1.52926
525	6300	33300	9.25	1.75	10.75	22.6945	38.5204	13.8759	15.4677	1.13622	999.423	1006.58	0.19822	4192.53	25.1967	500.264	0.75494	1510.68	0	1330.29	1322.89	1.55571	0	1.52926
526	6312	33312	9.25333	1.75333	10.7533	22.7089	38.5485	13.8834	15.4767	1.13612	999.421	1006.58	0.19822	4192.52	25.2028	500.728	0.754823	1511.85	0	1331.44	1324.04	1.55706	0	1.52926
527	6324	33324	9.25667	1.75667	10.7567	22.7233	38.5764	13.891	15.4856	1.13601	999.419	1006.58	0.19822	4192.52	25.209	501.192	0.754707	1513.01	0	1332.59	1325.18	1.5584	0	1.52926
528	6336	33336	9.26	1.76	10.76	22.7376	38.6044	13.8986	15.4946	1.13591	999.417	1006.58	0.19822	4192.51	25.2151	501.655	0.754591	1514.18	0	1333.73	1326.32	1.55974	0	1.52926
529	6348	33348	9.26333	1.76333	10.7633	22.752	38.6324	13.9062	15.5036	1.13581	999.415	1006.58	0.19822	4192.5	25.2213	502.118	0.754475	1515.34	0	1334.88	1327.47	1.56108	0	1.52926
530	6360	33360	9.26667	1.76667	10.7667	22.7663	38.6604	13.9138	15.5126	1.13571	999.413	1006.58	0.19822	4192.49	25.2275	502.58	0.754359	1516.5	0	1336.02	1328.61	1.56242	0	1.52926
531	6372	33372	9.27	1.77	10.77	22.7807	38.6883	13.9215	15.5216	1.13561	999.411	1006.59	0.19822	4192.49	25.2336	503.042	0.754243	1517.66	0	1337.17	1329.75	1.56376	0	1.52926
532	6384	33384	9.27333	1.77333	10.7733	22.795	38.7162	13.9291	15.5306	1.13551	999.409	1006.59	0.19822	4192.48	25.2398	503.503	0.754128	1518.82	0	1338.31	1330.89	1.56509	0	1.52926
533	6396	33396	9.27667	1.77667	10.7767	22.8094	38.7442	13.9367	15.5396	1.13541	999.407	1006.59	0.19822	4192.47	25.2459	503.964	0.754013	1519.98	0	1339.45	1332.03	1.56643	0	1.52926
534	6408	33408	9.28	1.78	10.78	22.8237	38.7721	13.9443	15.5486	1.13531	999.405	1006.59	0.19822	4192.46	25.2521	504.425	0.753898	1521.14	0	1340.59	1333.16	1.56777	0	1.52926
535	6420	33420	9.28333	1.78333	10.7833	22.8381	38.7999	13.952	15.5576	1.13521	999.403	1006.59	0.19822	4192.46	25.2582	504.885	0.753783	1522.3	0	1341.73	1334.3	1.5691	0	1.52926
536	6432	33432	9.28667	1.78667	10.7867	22.8524	38.8278	13.9596	15.5666	1.13511	999.402	1006.59	0.19822	4192.45	25.2643	505.345	0.753669	1523.45	0	1342.87	1335.44	1.57043	0	1.52926
537	6444	33444	9.29	1.79	10.79	22.8668	38.8557	13.9673	15.5756	1.13501	999.4	1006.59	0.19822	4192.44	25.2705	505.804	0.753555	1524.6	0	1344.01	1336.57	1.57176	0	1.52926
538	6456	33456	9.29333	1.79333	10.7933	22.8811	38.8835	13.9749	15.5847	1.13491	999.398	1006.59	0.19822	4192.43	25.2766	506.263	0.753441	1525.76	0	1345.15	1337.7	1.57309	0	1.52926
539	6468	33468	9.29667	1.79667	10.7967	22.8954	38.9114	13.9826	15.5937	1.13481	999.396	1006.59	0.19822	4192.43	25.2827	506.721	0.753327	1526.91	0	1346.29	1338.84	1.57442	0	1.52926
540	6480	33480	9.3	1.8	10.8	22.9098	38.9392	13.9903	15.6027	1.13471	999.394	1006.6	0.19822	4192.42	25.2889	507.179	0.753213	1528.06	0	1347.42	1339.97	1.57575	0	1.52926
541	6492	33492	9.30333	1.80333	10.8033	22.9241	38.967	13.998	15.6118	1.13461	999.392	1006.6	0.19822	4192.41	25.295	507.637	0.7531	1529.21	0	1348.55	1341.1	1.57707	0	1.52926
542	6504	33504	9.30667	1.80667	10.8067	22.9384	38.9948	14.0057	15.6208	1.13451	999.39	1006.6	0.19822	4192.4	25.3011	508.094	0.752987	1530.35	0	1349.69	1342.23	1.5784	0	1.52926
543	6516	33516	9.31	1.81	10.81	22.9528	39.0226	14.0133	15.6299	1.13441	999.388	1006.6	0.19822	4192.4	25.3073	508.551	0.752874	1531.5	0	1350.82	1343.36	1.57972	0	1.52926
544	6528	33528	9.31333	1.81333	10.8133	22.9671	39.0504	14.021	15.6389	1.13431	999.386	1006.6	0.19822	4192.39	25.3134	509.007	0.752761	1532.64	0	1351.95	1344.49	1.58105	0	1.52926
545	6540	33540	9.31667	1.81667	10.8167	22.9814	39.0781	14.0287	15.648	1.13421	999.384	1006.6	0.19822	4192.38	25.3195	509.463	0.752649	1533.79	0	1353.08	1345.61	1.58237	0	1.52926
546	6552	33552	9.32	1.82	10.82	22.9957	39.1058	14.0365	15.6571	1.13411	999.382	1006.6	0.19822	4192.38	25.3256	509.919	0.752537	1534.93	0	1354.21	1346.74	1.58369	0	1.52926
547	6564	33564	9.32333	1.82333	10.8233	23.0101	39.1336	14.0442	15.6661	1.13401	999.38	1006.6	0.19822	4192.37	25.3317	510.374	0.752425	1536.07	0	1355.34	1347.86	1.58501	0	1.52926
548	6576	33576	9.32667	1.82667	10.8267	23.0244	39.1613	14.0519	15.6752	1.13391	999.378	1006.61	0.19822	4192.36	25.3378	510.828	0.752313	1537.21	0	1356.47	1348.99	1.58633	0	1.52926
549	6588	33588	9.33	1.83	10.83	23.0387	39.189	14.0596	15.6843	1.13381	999.376	1006.61	0.19822	4192.35	25.3439	511.282	0.752201	1538.35	0	1357.59	1350.11	1.58765	0	1.52926
550	6600	33600	9.33333	1.83333	10.8333	23.053	39.2167	14.0674	15.6934	1.13371	999.374	1006.61	0.19822	4192.35	25.35	511.736	0.75209	1539.49	0	1358.72	1351.23	1.58896	0	1.52926
551	6612	33612	9.33667	1.83667	10.8367	23.0673	39.2443	14.0751	15.7025	1.13361	999.373	1006.61	0.19822	4192.34	25.3561	512.189	0.751979	1540.62	0	1359.84	1352.35	1.59028	0	1.52926
552	6624	33624	9.34	1.84	10.84	23.0816	39.272	14.0829	15.7116	1.13351	999.371	1006.61	0.19822	4192.33	25.3622	512.642	0.751868	1541.76	0	1360.97	1353.47	1.59159	0	1.52926
553	6636	33636	9.34333	1.84333	10.8433	23.096	39.2996	14.0906	15.7207	1.13341	999.369	1006.61	0.19822	4192.32	25.3683	513.095	0.751757	1542.89	0	1362.09	1354.59	1.5929	0	1.52926
554	6648	33648	9.34667	1.84667	10.8467	23.1103	39.3273	14.0984	15.7298	1.13331	999.367	1006.61	0.19822	4192.32	25.3744	513.547	0.751646	1544.02	0	1363.21	1355.71	1.59421	0	1.52926
555	6660	33660	9.35	1.85	10.85	23.1246	39.3549	14.1061	15.7389	1.13321	999.365	1006.61	0.19822	4192.31	25.3805	513.998	0.751536	1545.15	0	1364.33	1356.83	1.59552	0	1.52926
556	6672	33672	9.35333	1.85333	10.8533	23.1389	39.3825	14.1139	15.748	1.13311	999.363	1006.61	0.19822	4192.3	25.3866	514.449	0.751426	1546.28	0	1365.45	1357.94	1.59683	0	1.52926
557	6684	33684	9.35667	1.85667	10.8567	23.1532	39.4101	14.1217	15.7572	1.13302	999.361	1006.62	0.19822	4192.29	25.3927	514.9	0.751316	1547.41	0	1366.57	1359.06	1.59814	0	1.52926
558	6696	33696	9.36	1.86	10.86	23.1675	39.4376	14.1295	15.7663	1.13292	999.359	1006.62	0.19822	4192.29	25.3988	515.35	0.751206	1548.54	0	1367.69	1360.17	1.59945	0	1.52926
559	6708	33708	9.36333	1.86333	10.8633	23.1818	39.4652	14.1373	15.7754	1.13282	999.357	1006.62	0.19822	4192.28	25.4049	515.8	0.751097	1549.66	0	1368.8	1361.28	1.60075	0	1.52926
560	6720	33720	9.36667	1.86667	10.8667	23.1961	39.4928	14.1451	15.7846	1.13272	999.355	1006.62	0.19822	4192.27	25.4109	516.25	0.750987	1550.79	0	1369.92	1362.39	1.60206	0	1.52926
561	6732	33732	9.37	1.87	10.87	23.2104	39.5203	14.1529	15.7937	1.13262	999.353	1006.62	0.19822	4192.26	25.417	516.699	0.750878	1551.91	0	1371.03	1363.5	1.60336	0	1.52926
562	6744	33744	9.37333	1.87333	10.8733	23.2246	39.5478	14.1607	15.8029	1.13252	999.351	1006.62	0.19822	4192.26	25.4231	517.147	0.750769	1553.03	0	1372.14	1364.61	1.60466	0	1.52926
563	6756	33756	9.37667	1.87667	10.8767	23.2389	39.5753	14.1685	15.812	1.13242	999.349	1006.62	0.19822	4192.25	25.4291	517.595	0.75066	1554.15	0	1373.26	1365.72	1.60596	0	1.52926
564	6768	33768	9.38	1.88	10.88	23.2532	39.6028	14.1764	15.8212	1.13232	999.347	1006.62	0.19822	4192.24	25.4352	518.043	0.750552	1555.27	0	1374.37	1366.83	1.60726	0	1.52926
565	6780	33780	9.38333	1.88333	10.8833	23.2675	39.6303	14.1842	15.8304	1.13222	999.345	1006.62	0.19822	4192.23	25.4413	518.49	0.750444	1556.39	0	1375.48	1367.94	1.60856	0	1.52926
566	6792	33792	9.38667	1.88667	10.8867	23.2818	39.6577	14.192	15.8395	1.13213	999.343	1006.63	0.19822	4192.23	25.4473	518.937	0.750336	1557.51	0	1376.59	1369.04	1.60986	0	1.52926
567	6804	33804	9.39	1.89	10.89	23.2961	39.6852	14.1999	15.8487	1.13203	999.341	1006.63	0.19822	4192.22	25.4534	519.383	0.750228	1558.62	0	1377.7	1370.15	1.61115	0	1.52926
568	6816	33816	9.39333	1.89333	10.8933	23.3103	39.7126	14.2077	15.8579	1.13193	999.339	1006.63	0.19822	4192.21	25.4595	519.829	0.75012	1559.74	0	1378.8	1371.25	1.61245	0	1.52926
569	6828	33828	9.39667	1.89667	10.8967	23.3246	39.74	14.2156	15.8671	1.13183	999.337	1006.63	0.19822	4192.2	25.4655	520.274	0.750012	1560.85	0	1379.91	1372.35	1.61374	0	1.52926
570	6840	33840	9.4	1.9	10.9	23.3389	39.7674	14.2234	15.8763	1.13173	999.335	1006.63	0.19822	4192.2	25.4716	520.719	0.749905	1561.96	0	1381.01	1373.46	1.61503	0	1.52926
571	6852	33852	9.40333	1.90333	10.9033	23.3532	39.7948	14.2313	15.8855	1.13164	999.333	1006.63	0.19822	4192.19	25.4776	521.164	0.749798	1563.07	0	1382.12	1374.56	1.61632	0	1.52926
572	6864	33864	9.40667	1.90667	10.9067	23.3674	39.8222	14.2392	15.8947	1.13154	999.331	1006.63	0.19822	4192.18	25.4836	521.608	0.749691	1564.18	0	1383.22	1375.66	1.61761	0	1.52926
573	6876	33876	9.41	1.91	10.91	23.3817	39.8495	14.2471	15.9039	1.13144	999.329	1006.63	0.19822	4192.17	25.4897	522.052	0.749584	1565.29	0	1384.32	1376.75	1.6189	0	1.52926
574	6888	33888	9.41333	1.91333	10.9133	23.396	39.8769	14.255	15.9131	1.13134	999.327	1006.63	0.19822	4192.17	25.4957	522.495	0.749478	1566.39	0	1385.42	1377.85	1.62019	0	1.52926
575	6900	33900	9.41667	1.91667	10.9167	23.4102	39.9042	14.2628	15.9223	1.13124	999.325	1006.64	0.19822	4192.16	25.5018	522.938	0.749372	1567.5	0	1386.52	1378.95	1.62148	0	1.52926
576	6912	33912	9.42	1.92	10.92	23.4245	39.9315	14.2708	15.9315	1.13115	999.323	1006.64	0.19822	4192.15	25.5078	523.38	0.749265	1568.6	0	1387.62	1380.04	1.62276	0	1.52926
577	6924	33924	9.42333	1.92333	10.9233	23.4387	39.9588	14.2787	15.9407	1.13105	999.321	1006.64	0.19822	4192.14	25.5138	523.822	0.74916	1569.7	0	1388.72	1381.14	1.62405	0	1.52926
578	6936	33936	9.42667	1.92667	10.9267	23.453	39.9861	14.2866	15.95	1.13095	999.319	1006.64	0.19822	4192.14	25.5199	524.263	0.749054	1570.81	0	1389.82	1382.23	1.62533	0	1.52926
579	6948	33948	9.43	1.93	10.93	23.4672	40.0133	14.2945	15.9592	1.13085	999.317	1006.64	0.19822	4192.13	25.5259	524.704	0.748948	1571.91	0	1390.91	1383.32	1.62661	0	1.52926
580	6960	33960	9.43333	1.93333	10.9333	23.4815	40.0406	14.3024	15.9685	1.13075	999.315	1006.64	0.19822	4192.12	25.5319	525.145	0.748843	1573	0	1392.01	1384.41	1.62789	0	1.52926
581	6972	33972	9.43667	1.93667	10.9367	23.4957	40.0678	14.3103	15.9777	1.13066	999.313	1006.64	0.19822	4192.11	25.5379	525.585	0.748738	1574.1	0	1393.1	1385.5	1.62917	0	1.52926
582	6984	33984	9.44	1.94	10.94	23.51	40.095	14.3183	15.987	1.13056	999.311	1006.64	0.19822	4192.11	25.5439	526.025	0.748633	1575.2	0	1394.19	1386.59	1.63045	0	1.52926
583	6996	33996	9.44333	1.94333	10.9433	23.5242	40.1222	14.3262	15.9962	1.13046	999.309	1006.65	0.19822	4192.1	25.55	526.464	0.748528	1576.29	0	1395.28	1387.68	1.63172	0	1.52926
584	7008	34008	9.44667	1.94667	10.9467	23.5385	40.1494	14.3342	16.0055	1.13037	999.307	1006.65	0.19822	4192.09	25.556	526.903	0.748423	1577.38	0	1396.37	1388.77	1.633	0	1.52926
585	7020	34020	9.45	1.95	10.95	23.5527	40.1766	14.3421	16.0147	1.13027	999.305	1006.65	0.19822	4192.08	25.562	527.341	0.748319	1578.48	0	1397.46	1389.85	1.63427	0	1.52926
586	7032	34032	9.45333	1.95333	10.9533	23.5669	40.2038	14.3501	16.024	1.13017	999.303	1006.65	0.19822	4192.08	25.568	527.779	0.748215	1579.57	0	1398.55	1390.94	1.63554	0	1.52926
587	7044	34044	9.45667	1.95667	10.9567	23.5812	40.2309	14.3581	16.0333	1.13007	999.301	1006.65	0.19822	4192.07	25.574	528.216	0.748111	1580.66	0	1399.64	1392.02	1.63682	0	1.52926
588	7056	34056	9.46	1.96	10.96	23.5954	40.2581	14.366	16.0426	1.12998	999.299	1006.65	0.19822	4192.06	25.58	528.653	0.748007	1581.74	0	1400.73	1393.11	1.63809	0	1.52926
589	7068	34068	9.46333	1.96333	10.9633	23.6096	40.2852	14.374	16.0519	1.12988	999.297	1006.65	0.19822	4192.05	25.586	529.089	0.747903	1582.83	0	1401.81	1394.19	1.63935	0	1.52926
590	7080	34080	9.46667	1.96667	10.9667	23.6238	40.3123	14.382	16.0611	1.12978	999.295	1006.65	0.19822	4192.04	25.592	529.526	0.7478	1583.92	0	1402.89	1395.27	1.64062	0	1.52926
591	7092	34092	9.47	1.97	10.97	23.6381	40.3394	14.39	16.0704	1.12969	999.293	1006.65	0.19822	4192.04	25.598	529.961	0.747697	1585	0	1403.98	1396.35	1.64189	0	1.52926
592	7104	34104	9.47333	1.97333	10.9733	23.6523	40.3664	14.398	16.0797	1.12959	999.291	1006.66	0.19822	4192.03	25.604	530.396	0.747594	1586.08	0	1405.06	1397.43	1.64315	0	1.52926
593	7116	34116	9.47667	1.97667	10.9767	23.6665	40.3935	14.406	16.089	1.12949	999.289	1006.66	0.19822	4192.02	25.61	530.831	0.747491	1587.16	0	1406.14	1398.5	1.64442	0	1.52926
594	7128	34128	9.48	1.98	10.98	23.6807	40.4205	14.414	16.0984	1.1294	999.287	1006.66	0.19822	4192.01	25.6159	531.265	0.747388	1588.24	0	1407.22	1399.58	1.64568	0	1.52926
595	7140	34140	9.48333	1.98333	10.9833	23.6949	40.4475	14.422	16.1077	1.1293	999.285	1006.66	0.19822	4192.01	25.6219	531.699	0.747285	1589.32	0	1408.3	1400.66	1.64694	0	1.52926
596	7152	34152	9.48667	1.98667	10.9867	23.7091	40.4745	14.4301	16.117	1.1292	999.283	1006.66	0.19822	4192	25.6279	532.132	0.747183	1590.4	0	1409.38	1401.73	1.6482	0	1.52926
597	7164	34164	9.49	1.99	10.99	23.7233	40.5015	14.4381	16.1263	1.12911	999.281	1006.66	0.19822	4191.99	25.6339	532.565	0.747081	1591.48	0	1410.45	1402.8	1.64946	0	1.52926
598	7176	34176	9.49333	1.99333	10.9933	23.7375	40.5285	14.4461	16.1356	1.12901	999.279	1006.66	0.19822	4191.98	25.6399	532.998	0.746979	1592.55	0	1411.53	1403.88	1.65072	0	1.52926
599	7188	34188	9.49667	1.99667	10.9967	23.7517	40.5555	14.4542	16.145	1.12891	999.277	1006.66	0.19822	4191.98	25.6458	533.429	0.746877	1593.63	0	1412.6	1404.95	1.65198	0	1.52926
600	7200	34200	9.5	2	11	23.7659	40.5824	14.4622	16.1543	1.12882	999.275	1006.66	0.19822	4191.97	25.6518	533.861	0.746775	1594.7	0	1413.68	1406.02	1.65323	0	1.52926
601	7212	34212	9.50333	2.00333	11.0033	23.7801	40.6093	14.4703	16.1637	1.12872	999.273	1006.67	0.19822	4191.96	25.6578	534.292	0.746674	1595.77	0	1414.75	1407.09	1.65448	0	1.52926
602	7224	34224	9.50667	2.00667	11.0067	23.7943	40.6363	14.4783	16.173	1.12863	999.271	1006.67	0.19822	4191.95	25.6637	534.723	0.746573	1596.84	0	1415.82	1408.15	1.65574	0	1.52926
603	7236	34236	9.51	2.01	11.01	23.8085	40.6632	14.4864	16.1824	1.12853	999.269	1006.67	0.19822	4191.95	25.6697	535.153	0.746472	1597.91	0	1416.89	1409.22	1.65699	0	1.52926
604	7248	34248	9.51333	2.01333	11.0133	23.8227	40.69	14.4945	16.1917	1.12843	999.267	1006.67	0.19822	4191.94	25.6756	535.582	0.746371	1598.97	0	1417.96	1410.29	1.65824	0	1.52926
605	7260	34260	9.51667	2.01667	11.0167	23.8369	40.7169	14.5026	16.2011	1.12834	999.264	1006.67	0.19822	4191.93	25.6816	536.012	0.74627	1600.04	0	1419.03	1411.35	1.65949	0	1.52926
606	7272	34272	9.52	2.02	11.02	23.8511	40.7438	14.5106	16.2105	1.12824	999.262	1006.67	0.19822	4191.92	25.6875	536.44	0.746169	1601.1	0	1420.09	1412.41	1.66073	0	1.52926
607	7284	34284	9.52333	2.02333	11.0233	23.8652	40.7706	14.5187	16.2198	1.12815	999.26	1006.67	0.19822	4191.92	25.6935	536.869	0.746069	1602.16	0	1421.16	1413.48	1.66198	0	1.52926
608	7296	34296	9.52667	2.02667	11.0267	23.8794	40.7974	14.5268	16.2292	1.12805	999.258	1006.67	0.19822	4191.91	25.6994	537.296	0.745969	1603.23	0	1422.22	1414.54	1.66323	0	1.52926
609	7308	34308	9.53	2.03	11.03	23.8936	40.8242	14.5349	16.2386	1.12796	999.256	1006.67	0.19822	4191.9	25.7054	537.724	0.745869	1604.29	0	1423.29	1415.6	1.66447	0	1.52926
610	7320	34320	9.53333	2.03333	11.0333	23.9078	40.851	14.543	16.248	1.12786	999.254	1006.68	0.19822	4191.89	25.7113	538.151	0.745769	1605.34	0	1424.35	1416.66	1.66571	0	1.52926
611	7332	34332	9.53667	2.03667	11.0367	23.9219	40.8778	14.5512	16.2574	1.12776	999.252	1006.68	0.19822	4191.88	25.7172	538.577	0.745669	1606.4	0	1425.41	1417.72	1.66695	0	1.52926
612	7344	34344	9.54	2.04	11.04	23.9361	40.9045	14.5593	16.2668	1.12767	999.25	1006.68	0.19822	4191.88	25.7232	539.003	0.74557	1607.46	0	1426.47	1418.77	1.66819	0	1.52926
613	7356	34356	9.54333	2.04333	11.0433	23.9502	40.9313	14.5674	16.2762	1.12757	999.248	1006.68	0.19822	4191.87	25.7291	539.429	0.74547	1608.51	0	1427.53	1419.83	1.66943	0	1.52926
614	7368	34368	9.54667	2.04667	11.0467	23.9644	40.958	14.5755	16.2856	1.12748	999.246	1006.68	0.19822	4191.86	25.735	539.854	0.745371	1609.57	0	1428.59	1420.88	1.67067	0	1.52926
615	7380	34380	9.55	2.05	11.05	23.9786	40.9847	14.5837	16.295	1.12738	999.244	1006.68	0.19822	4191.85	25.7409	540.278	0.745272	1610.62	0	1429.64	1421.94	1.6719	0	1.52926
616	7392	34392	9.55333	2.05333	11.0533	23.9927	41.0114	14.5918	16.3044	1.12729	999.242	1006.68	0.19822	4191.85	25.7469	540.702	0.745173	1611.67	0	1430.7	1422.99	1.67314	0	1.52926
617	7404	34404	9.55667	2.05667	11.0567	24.0069	41.0381	14.6	16.3138	1.12719	999.24	1006.68	0.19822	4191.84	25.7528	541.126	0.745075	1612.72	0	1431.75	1424.04	1.67437	0	1.52926
618	7416	34416	9.56	2.06	11.06	24.021	41.0647	14.6081	16.3232	1.1271	999.238	1006.69	0.19822	4191.83	25.7587	541.549	0.744976	1613.77	0	1432.81	1425.09	1.6756	0	1.52926
619	7428	34428	9.56333	2.06333	11.0633	24.0351	41.0914	14.6163	16.3327	1.127	999.236	1006.69	0.19822	4191.82	25.7646	541.972	0.744878	1614.81	0	1433.86	1426.14	1.67684	0	1.52926
620	7440	34440	9.56667	2.06667	11.0667	24.0493	41.118	14.6245	16.3421	1.12691	999.233	1006.69	0.19822	4191.82	25.7705	542.394	0.74478	1615.86	0	1434.91	1427.19	1.67806	0	1.52926
621	7452	34452	9.57	2.07	11.07	24.0634	41.1446	14.6326	16.3515	1.12681	999.231	1006.69	0.19822	4191.81	25.7764	542.816	0.744682	1616.9	0	1435.96	1428.24	1.67929	0	1.52926
622	7464	34464	9.57333	2.07333	11.0733	24.0776	41.1712	14.6408	16.361	1.12672	999.229	1006.69	0.19822	4191.8	25.7823	543.237	0.744584	1617.94	0	1437.01	1429.28	1.68052	0	1.52926
623	7476	34476	9.57667	2.07667	11.0767	24.0917	41.1978	14.649	16.3704	1.12662	999.227	1006.69	0.19822	4191.79	25.7882	543.658	0.744486	1618.98	0	1438.06	1430.33	1.68175	0	1.52926
624	7488	34488	9.58	2.08	11.08	24.1058	41.2243	14.6572	16.3799	1.12653	999.225	1006.69	0.19822	4191.78	25.7941	544.079	0.744389	1620.02	0	1439.1	1431.37	1.68297	0	1.52926
625	7500	34500	9.58333	2.08333	11.0833	24.1199	41.2509	14.6654	16.3893	1.12644	999.223	1006.69	0.19822	4191.78	25.8	544.499	0.744292	1621.06	0	1440.15	1432.41	1.68419	0	1.52926
626	7512	34512	9.58667	2.08667	11.0867	24.1341	41.2774	14.6736	16.3988	1.12634	999.221	1006.69	0.19822	4191.77	25.8059	544.918	0.744195	1622.1	0	1441.2	1433.45	1.68541	0	1.52926
627	7524	34524	9.59	2.09	11.09	24.1482	41.3039	14.6818	16.4083	1.12625	999.219	1006.7	0.19822	4191.76	25.8118	545.337	0.744098	1623.14	0	1442.24	1434.49	1.68663	0	1.52926
628	7536	34536	9.59333	2.09333	11.0933	24.1623	41.3304	14.69	16.4177	1.12615	999.217	1006.7	0.19822	4191.75	25.8177	545.756	0.744001	1624.17	0	1443.28	1435.53	1.68785	0	1.52926
629	7548	34548	9.59667	2.09667	11.0967	24.1764	41.3569	14.6982	16.4272	1.12606	999.215	1006.7	0.19822	4191.75	25.8236	546.174	0.743904	1625.2	0	1444.32	1436.57	1.68907	0	1.52926
630	7560	34560	9.6	2.1	11.1	24.1905	41.3833	14.7065	16.4367	1.12596	999.213	1006.7	0.19822	4191.74	25.8295	546.591	0.743808	1626.23	0	1445.36	1437.61	1.69029	0	1.52926
631	7572	34572	9.60333	2.10333	11.1033	24.2046	41.4098	14.7147	16.4462	1.12587	999.21	1006.7	0.19822	4191.73	25.8353	547.008	0.743711	1627.27	0	1446.4	1438.64	1.6915	0	1.52926
632	7584	34584	9.60667	2.10667	11.1067	24.2187	41.4362	14.7229	16.4556	1.12578	999.208	1006.7	0.19822	4191.72	25.8412	547.425	0.743615	1628.29	0	1447.44	1439.68	1.69272	0	1.52926
633	7596	34596	9.61	2.11	11.11	24.2328	41.4626	14.7312	16.4651	1.12568	999.206	1006.7	0.19822	4191.72	25.8471	547.841	0.743519	1629.32	0	1448.48	1440.71	1.69393	0	1.52926
634	7608	34608	9.61333	2.11333	11.1133	24.2469	41.489	14.7394	16.4746	1.12559	999.204	1006.7	0.19822	4191.71	25.8529	548.257	0.743423	1630.35	0	1449.51	1441.74	1.69514	0	1.52926
635	7620	34620	9.61667	2.11667	11.1167	24.261	41.5154	14.7477	16.4841	1.1255	999.202	1006.7	0.19822	4191.7	25.8588	548.672	0.743328	1631.37	0	1450.55	1442.78	1.69635	0	1.52926
636	7632	34632	9.62	2.12	11.12	24.2751	41.5418	14.756	16.4936	1.1254	999.2	1006.71	0.19822	4191.69	25.8647	549.087	0.743232	1632.4	0	1451.58	1443.81	1.69756	0	1.52926
637	7644	34644	9.62333	2.12333	11.1233	24.2892	41.5681	14.7642	16.5032	1.12531	999.198	1006.71	0.19822	4191.68	25.8705	549.501	0.743137	1633.42	0	1452.61	1444.84	1.69876	0	1.52926
638	7656	34656	9.62667	2.12667	11.1267	24.3033	41.5944	14.7725	16.5127	1.12521	999.196	1006.71	0.19822	4191.68	25.8764	549.915	0.743042	1634.44	0	1453.64	1445.86	1.69997	0	1.52926
639	7668	34668	9.63	2.13	11.13	24.3174	41.6207	14.7808	16.5222	1.12512	999.194	1006.71	0.19822	4191.67	25.8822	550.328	0.742947	1635.46	0	1454.67	1446.89	1.70117	0	1.52926
640	7680	34680	9.63333	2.13333	11.1333	24.3314	41.647	14.7891	16.5317	1.12503	999.191	1006.71	0.19822	4191.66	25.8881	550.741	0.742852	1636.48	0	1455.7	1447.92	1.70238	0	1.52926
641	7692	34692	9.63667	2.13667	11.1367	24.3455	41.6733	14.7974	16.5412	1.12493	999.189	1006.71	0.19822	4191.65	25.8939	551.153	0.742757	1637.49	0	1456.73	1448.94	1.70358	0	1.52926
642	7704	34704	9.64	2.14	11.14	24.3596	41.6996	14.8057	16.5508	1.12484	999.187	1006.71	0.19822	4191.65	25.8998	551.565	0.742663	1638.51	0	1457.75	1449.96	1.70478	0	1.52926
643	7716	34716	9.64333	2.14333	11.1433	24.3736	41.7258	14.814	16.5603	1.12475	999.185	1006.71	0.19822	4191.64	25.9056	551.977	0.742568	1639.52	0	1458.78	1450.99	1.70598	0	1.52926
644	7728	34728	9.64667	2.14667	11.1467	24.3877	41.752	14.8223	16.5699	1.12466	999.183	1006.71	0.19822	4191.63	25.9115	552.388	0.742474	1640.53	0	1459.8	1452.01	1.70718	0	1.52926
645	7740	34740	9.65	2.15	11.15	24.4018	41.7782	14.8306	16.5794	1.12456	999.181	1006.72	0.19822	4191.62	25.9173	552.798	0.74238	1641.54	0	1460.83	1453.03	1.70837	0	1.52926
646	7752	34752	9.65333	2.15333	11.1533	24.4158	41.8044	14.8389	16.5889	1.12447	999.179	1006.72	0.19822	4191.61	25.9231	553.208	0.742286	1642.55	0	1461.85	1454.05	1.70957	0	1.52926
647	7764	34764	9.65667	2.15667	11.1567	24.4299	41.8306	14.8472	16.5985	1.12438	999.177	1006.72	0.19822	4191.61	25.929	553.618	0.742192	1643.56	0	1462.87	1455.06	1.71076	0	1.52926
648	7776	34776	9.66	2.16	11.16	24.4439	41.8568	14.8556	16.6081	1.12428	999.174	1006.72	0.19822	4191.6	25.9348	554.027	0.742099	1644.57	0	1463.89	1456.08	1.71195	0	1.52926
649	7788	34788	9.66333	2.16333	11.1633	24.458	41.8829	14.8639	16.6176	1.12419	999.172	1006.72	0.19822	4191.59	25.9406	554.435	0.742005	1645.58	0	1464.91	1457.09	1.71314	0	1.52926
650	7800	34800	9.66667	2.16667	11.1667	24.472	41.909	14.8722	16.6272	1.1241	999.17	1006.72	0.19822	4191.58	25.9464	554.843	0.741912	1646.58	0	1465.92	1458.11	1.71433	0	1.52926
651	7812	34812	9.67	2.17	11.17	24.486	41.9351	14.8806	16.6368	1.12401	999.168	1006.72	0.19822	4191.58	25.9522	555.251	0.741819	1647.58	0	1466.94	1459.12	1.71552	0	1.52926
652	7824	34824	9.67333	2.17333	11.1733	24.5001	41.9612	14.889	16.6463	1.12391	999.166	1006.72	0.19822	4191.57	25.9581	555.658	0.741726	1648.58	0	1467.95	1460.13	1.71671	0	1.52926
653	7836	34836	9.67667	2.17667	11.1767	24.5141	41.9873	14.8973	16.6559	1.12382	999.164	1006.73	0.19822	4191.56	25.9639	556.065	0.741633	1649.58	0	1468.97	1461.14	1.71789	0	1.52926
654	7848	34848	9.68	2.18	11.18	24.5281	42.0133	14.9057	16.6655	1.12373	999.162	1006.73	0.19822	4191.55	25.9697	556.471	0.74154	1650.58	0	1469.98	1462.15	1.71908	0	1.52926
655	7860	34860	9.68333	2.18333	11.1833	24.5422	42.0394	14.9141	16.6751	1.12364	999.16	1006.73	0.19822	4191.54	25.9755	556.876	0.741448	1651.58	0	1470.99	1463.16	1.72026	0	1.52926
656	7872	34872	9.68667	2.18667	11.1867	24.5562	42.0654	14.9224	16.6847	1.12354	999.157	1006.73	0.19822	4191.54	25.9813	557.282	0.741355	1652.57	0	1472	1464.17	1.72144	0	1.52926
657	7884	34884	9.69	2.19	11.19	24.5702	42.0914	14.9308	16.6943	1.12345	999.155	1006.73	0.19822	4191.53	25.9871	557.686	0.741263	1653.57	0	1473.01	1465.18	1.72262	0	1.52926
658	7896	34896	9.69333	2.19333	11.1933	24.5842	42.1174	14.9392	16.7039	1.12336	999.153	1006.73	0.19822	4191.52	25.9929	558.091	0.741171	1654.56	0	1474.02	1466.18	1.7238	0	1.52926
659	7908	34908	9.69667	2.19667	11.1967	24.5982	42.1433	14.9476	16.7135	1.12327	999.151	1006.73	0.19822	4191.51	25.9987	558.494	0.741079	1655.55	0	1475.03	1467.18	1.72498	0	1.52926
660	7920	34920	9.7	2.2	11.2	24.6122	42.1693	14.956	16.7231	1.12318	999.149	1006.73	0.19822	4191.51	26.0045	558.898	0.740987	1656.54	0	1476.03	1468.19	1.72615	0	1.52926
661	7932	34932	9.70333	2.20333	11.2033	24.6262	42.1952	14.9644	16.7327	1.12308	999.147	1006.73	0.19822	4191.5	26.0102	559.3	0.740896	1657.53	0	1477.03	1469.19	1.72733	0	1.52926
662	7944	34944	9.70667	2.20667	11.2067	24.6402	42.2211	14.9728	16.7423	1.12299	999.144	1006.74	0.19822	4191.49	26.016	559.703	0.740804	1658.52	0	1478.04	1470.19	1.7285	0	1.52926
663	7956	34956	9.71	2.21	11.21	24.6542	42.247	14.9812	16.752	1.1229	999.142	1006.74	0.19822	4191.48	26.0218	560.104	0.740713	1659.51	0	1479.04	1471.19	1.72967	0	1.52926
664	7968	34968	9.71333	2.21333	11.2133	24.6682	42.2729	14.9897	16.7616	1.12281	999.14	1006.74	0.19822	4191.47	26.0276	560.506	0.740622	1660.49	0	1480.04	1472.19	1.73084	0	1.52926
665	7980	34980	9.71667	2.21667	11.2167	24.6822	42.2988	14.9981	16.7712	1.12272	999.138	1006.74	0.19822	4191.47	26.0334	560.907	0.740531	1661.47	0	1481.04	1473.18	1.73201	0	1.52926
666	7992	34992	9.72	2.22	11.22	24.6962	42.3246	15.0065	16.7809	1.12263	999.136	1006.74	0.19822	4191.46	26.0391	561.307	0.74044	1662.46	0	1482.04	1474.18	1.73318	0	1.52926
667	8004	35004	9.72333	2.22333	11.2233	24.7102	42.3504	15.015	16.7905	1.12254	999.134	1006.74	0.19822	4191.45	26.0449	561.707	0.740349	1663.44	0	1483.04	1475.17	1.73434	0	1.52926
668	8016	35016	9.72667	2.22667	11.2267	24.7242	42.3762	15.0234	16.8002	1.12244	999.131	1006.74	0.19822	4191.44	26.0507	562.106	0.740258	1664.41	0	1484.03	1476.16	1.73551	0	1.52926
669	8028	35028	9.73	2.23	11.23	24.7381	42.402	15.0319	16.8098	1.12235	999.129	1006.74	0.19822	4191.44	26.0564	562.505	0.740168	1665.39	0	1485.03	1477.16	1.73667	0	1.52926
670	8040	35040	9.73333	2.23333	11.2333	24.7521	42.4278	15.0403	16.8195	1.12226	999.127	1006.74	0.19822	4191.43	26.0622	562.903	0.740078	1666.37	0	1486.02	1478.15	1.73783	0	1.52926
671	8052	35052	9.73667	2.23667	11.2367	24.7661	42.4535	15.0488	16.8291	1.12217	999.125	1006.75	0.19822	4191.42	26.0679	563.301	0.739987	1667.34	0	1487.01	1479.14	1.73899	0	1.52926
672	8064	35064	9.74	2.24	11.24	24.7801	42.4793	15.0573	16.8388	1.12208	999.123	1006.75	0.19822	4191.41	26.0737	563.699	0.739897	1668.32	0	1488	1480.13	1.74015	0	1.52926
673	8076	35076	9.74333	2.24333	11.2433	24.794	42.505	15.0657	16.8484	1.12199	999.121	1006.75	0.19822	4191.4	26.0794	564.096	0.739808	1669.29	0	1488.99	1481.11	1.74131	0	1.52926
674	8088	35088	9.74667	2.24667	11.2467	24.808	42.5307	15.0742	16.8581	1.1219	999.118	1006.75	0.19822	4191.4	26.0852	564.492	0.739718	1670.26	0	1489.98	1482.1	1.74247	0	1.52926
675	8100	35100	9.75	2.25	11.25	24.8219	42.5564	15.0827	16.8678	1.12181	999.116	1006.75	0.19822	4191.39	26.0909	564.888	0.739628	1671.23	0	1490.97	1483.08	1.74362	0	1.52926
676	8112	35112	9.75333	2.25333	11.2533	24.8359	42.582	15.0912	16.8775	1.12172	999.114	1006.75	0.19822	4191.38	26.0967	565.283	0.739539	1672.2	0	1491.96	1484.07	1.74478	0	1.52926
677	8124	35124	9.75667	2.25667	11.2567	24.8498	42.6077	15.0997	16.8872	1.12163	999.112	1006.75	0.19822	4191.37	26.1024	565.678	0.739449	1673.16	0	1492.94	1485.05	1.74593	0	1.52926
678	8136	35136	9.76	2.26	11.26	24.8638	42.6333	15.1082	16.8968	1.12154	999.11	1006.75	0.19822	4191.36	26.1081	566.073	0.73936	1674.13	0	1493.93	1486.03	1.74708	0	1.52926
679	8148	35148	9.76333	2.26333	11.2633	24.8777	42.6589	15.1167	16.9065	1.12144	999.108	1006.75	0.19822	4191.36	26.1139	566.467	0.739271	1675.09	0	1494.91	1487.01	1.74823	0	1.52926
680	8160	35160	9.76667	2.26667	11.2667	24.8916	42.6845	15.1252	16.9162	1.12135	999.105	1006.76	0.19822	4191.35	26.1196	566.86	0.739182	1676.05	0	1495.89	1487.99	1.74938	0	1.52926
681	8172	35172	9.77	2.27	11.27	24.9056	42.7101	15.1337	16.9259	1.12126	999.103	1006.76	0.19822	4191.34	26.1253	567.253	0.739094	1677.01	0	1496.87	1488.97	1.75052	0	1.52926
682	8184	35184	9.77333	2.27333	11.2733	24.9195	42.7356	15.1423	16.9356	1.12117	999.101	1006.76	0.19822	4191.33	26.131	567.646	0.739005	1677.97	0	1497.85	1489.94	1.75167	0	1.52926
683	8196	35196	9.77667	2.27667	11.2767	24.9334	42.7611	15.1508	16.9453	1.12108	999.099	1006.76	0.19822	4191.33	26.1367	568.038	0.738917	1678.93	0	1498.83	1490.92	1.75281	0	1.52926
684	8208	35208	9.78	2.28	11.28	24.9473	42.7867	15.1593	16.955	1.12099	999.097	1006.76	0.19822	4191.32	26.1425	568.429	0.738828	1679.89	0	1499.8	1491.89	1.75395	0	1.52926
685	8220	35220	9.78333	2.28333	11.2833	24.9612	42.8122	15.1679	16.9648	1.1209	999.094	1006.76	0.19822	4191.31	26.1482	568.82	0.73874	1680.84	0	1500.78	1492.86	1.7551	0	1.52926
686	8232	35232	9.78667	2.28667	11.2867	24.9751	42.8376	15.1764	16.9745	1.12081	999.092	1006.76	0.19822	4191.3	26.1539	569.211	0.738652	1681.8	0	1501.75	1493.84	1.75623	0	1.52926
687	8244	35244	9.79	2.29	11.29	24.9891	42.8631	15.185	16.9842	1.12072	999.09	1006.76	0.19822	4191.29	26.1596	569.601	0.738564	1682.75	0	1502.73	1494.81	1.75737	0	1.52926
688	8256	35256	9.79333	2.29333	11.2933	25.003	42.8885	15.1935	16.9939	1.12063	999.088	1006.76	0.19822	4191.29	26.1653	569.99	0.738476	1683.7	0	1503.7	1495.78	1.75851	0	1.52926
689	8268	35268	9.79667	2.29667	11.2967	25.0169	42.914	15.2021	17.0037	1.12054	999.086	1006.77	0.19822	4191.28	26.171	570.379	0.738389	1684.65	0	1504.67	1496.74	1.75964	0	1.52926
690	8280	35280	9.8	2.3	11.3	25.0307	42.9394	15.2107	17.0134	1.12045	999.083	1006.77	0.19822	4191.27	26.1767	570.768	0.738301	1685.59	0	1505.64	1497.71	1.76078	0	1.52926
691	8292	35292	9.80333	2.30333	11.3033	25.0446	42.9647	15.2192	17.0231	1.12037	999.081	1006.77	0.19822	4191.26	26.1824	571.156	0.738214	1686.54	0	1506.61	1498.68	1.76191	0	1.52926
692	8304	35304	9.80667	2.30667	11.3067	25.0585	42.9901	15.2278	17.0329	1.12028	999.079	1006.77	0.19822	4191.25	26.188	571.544	0.738127	1687.49	0	1507.57	1499.64	1.76304	0	1.52926
693	8316	35316	9.81	2.31	11.31	25.0724	43.0155	15.2364	17.0426	1.12019	999.077	1006.77	0.19822	4191.25	26.1937	571.931	0.73804	1688.43	0	1508.54	1500.6	1.76417	0	1.52926
694	8328	35328	9.81333	2.31333	11.3133	25.0863	43.0408	15.245	17.0524	1.1201	999.075	1006.77	0.19822	4191.24	26.1994	572.317	0.737953	1689.37	0	1509.5	1501.57	1.7653	0	1.52926
695	8340	35340	9.81667	2.31667	11.3167	25.1002	43.0661	15.2536	17.0621	1.12001	999.072	1006.77	0.19822	4191.23	26.2051	572.703	0.737866	1690.31	0	1510.47	1502.53	1.76642	0	1.52926
696	8352	35352	9.82	2.32	11.32	25.114	43.0914	15.2622	17.0719	1.11992	999.07	1006.77	0.19822	4191.22	26.2108	573.089	0.737779	1691.25	0	1511.43	1503.49	1.76755	0	1.52926
697	8364	35364	9.82333	2.32333	11.3233	25.1279	43.1167	15.2708	17.0817	1.11983	999.068	1006.77	0.19822	4191.22	26.2164	573.474	0.737693	1692.19	0	1512.39	1504.44	1.76867	0	1.52926
698	8376	35376	9.82667	2.32667	11.3267	25.1418	43.1419	15.2794	17.0914	1.11974	999.066	1006.78	0.19822	4191.21	26.2221	573.858	0.737606	1693.13	0	1513.35	1505.4	1.7698	0	1.52926
699	8388	35388	9.83	2.33	11.33	25.1556	43.1672	15.288	17.1012	1.11965	999.063	1006.78	0.19822	4191.2	26.2278	574.242	0.73752	1694.06	0	1514.31	1506.36	1.77092	0	1.52926
700	8400	35400	9.83333	2.33333	11.3333	25.1695	43.1924	15.2966	17.111	1.11956	999.061	1006.78	0.19822	4191.19	26.2334	574.626	0.737434	1694.99	0	1515.27	1507.31	1.77204	0	1.52926
701	8412	35412	9.83667	2.33667	11.3367	25.1833	43.2176	15.3053	17.1208	1.11947	999.059	1006.78	0.19822	4191.18	26.2391	575.009	0.737348	1695.93	0	1516.22	1508.26	1.77315	0	1.52926
702	8424	35424	9.84	2.34	11.34	25.1972	43.2428	15.3139	17.1305	1.11939	999.057	1006.78	0.19822	4191.18	26.2448	575.392	0.737262	1696.86	0	1517.18	1509.22	1.77427	0	1.52926
703	8436	35436	9.84333	2.34333	11.3433	25.211	43.2679	15.3225	17.1403	1.1193	999.054	1006.78	0.19822	4191.17	26.2504	575.774	0.737176	1697.79	0	1518.13	1510.17	1.77538	0	1.52926
704	8448	35448	9.84667	2.34667	11.3467	25.2248	43.2931	15.3312	17.1501	1.11921	999.052	1006.78	0.19822	4191.16	26.2561	576.155	0.73709	1698.71	0	1519.08	1511.12	1.7765	0	1.52926
705	8460	35460	9.85	2.35	11.35	25.2387	43.3182	15.3398	17.1599	1.11912	999.05	1006.78	0.19822	4191.15	26.2617	576.536	0.737005	1699.64	0	1520.03	1512.06	1.77761	0	1.52926
706	8472	35472	9.85333	2.35333	11.3533	25.2525	43.3433	15.3485	17.1697	1.11903	999.048	1006.78	0.19822	4191.14	26.2673	576.917	0.73692	1700.56	0	1520.98	1513.01	1.77872	0	1.52926
707	8484	35484	9.85667	2.35667	11.3567	25.2663	43.3684	15.3572	17.1795	1.11894	999.046	1006.79	0.19822	4191.14	26.273	577.297	0.736834	1701.49	0	1521.93	1513.96	1.77983	0	1.52926
708	8496	35496	9.86	2.36	11.36	25.2801	43.3934	15.3658	17.1893	1.11886	999.043	1006.79	0.19822	4191.13	26.2786	577.676	0.736749	1702.41	0	1522.88	1514.9	1.78094	0	1.52926
709	8508	35508	9.86333	2.36333	11.3633	25.294	43.4185	15.3745	17.1991	1.11877	999.041	1006.79	0.19822	4191.12	26.2843	578.055	0.736664	1703.33	0	1523.82	1515.85	1.78204	0	1.52926
710	8520	35520	9.86667	2.36667	11.3667	25.3078	43.4435	15.3832	17.209	1.11868	999.039	1006.79	0.19822	4191.11	26.2899	578.434	0.736579	1704.25	0	1524.77	1516.79	1.78315	0	1.52926
711	8532	35532	9.87	2.37	11.37	25.3216	43.4685	15.3919	17.2188	1.11859	999.037	1006.79	0.19822	4191.1	26.2955	578.812	0.736495	1705.17	0	1525.71	1517.73	1.78425	0	1.52926
712	8544	35544	9.87333	2.37333	11.3733	25.3354	43.4935	15.4005	17.2286	1.1185	999.034	1006.79	0.19822	4191.1	26.3011	579.189	0.73641	1706.08	0	1526.65	1518.67	1.78535	0	1.52926
713	8556	35556	9.87667	2.37667	11.3767	25.3492	43.5185	15.4092	17.2384	1.11842	999.032	1006.79	0.19822	4191.09	26.3068	579.566	0.736326	1707	0	1527.59	1519.61	1.78645	0	1.52926
714	8568	35568	9.88	2.38	11.38	25.363	43.5434	15.4179	17.2482	1.11833	999.03	1006.79	0.19822	4191.08	26.3124	579.943	0.736241	1707.91	0	1528.53	1520.54	1.78755	0	1.52926
715	8580	35580	9.88333	2.38333	11.3833	25.3768	43.5684	15.4266	17.2581	1.11824	999.028	1006.79	0.19822	4191.07	26.318	580.319	0.736157	1708.82	0	1529.47	1521.48	1.78865	0	1.52926
716	8592	35592	9.88667	2.38667	11.3867	25.3906	43.5933	15.4353	17.2679	1.11815	999.025	1006.8	0.19822	4191.06	26.3236	580.694	0.736073	1709.73	0	1530.41	1522.41	1.78975	0	1.52926
717	8604	35604	9.89	2.39	11.39	25.4043	43.6182	15.4441	17.2778	1.11806	999.023	1006.8	0.19822	4191.06	26.3292	581.069	0.735989	1710.64	0	1531.35	1523.35	1.79084	0	1.52926
718	8616	35616	9.89333	2.39333	11.3933	25.4181	43.643	15.4528	17.2876	1.11798	999.021	1006.8	0.19822	4191.05	26.3348	581.444	0.735905	1711.55	0	1532.28	1524.28	1.79193	0	1.52926
719	8628	35628	9.89667	2.39667	11.3967	25.4319	43.6679	15.4615	17.2975	1.11789	999.019	1006.8	0.19822	4191.04	26.3404	581.818	0.735822	1712.46	0	1533.21	1525.21	1.79303	0	1.52926
720	8640	35640	9.9	2.4	11.4	25.4457	43.6927	15.4702	17.3073	1.1178	999.016	1006.8	0.19822	4191.03	26.346	582.191	0.735738	1713.36	0	1534.15	1526.14	1.79412	0	1.52926
721	8652	35652	9.90333	2.40333	11.4033	25.4594	43.7175	15.479	17.3172	1.11772	999.014	1006.8	0.19822	4191.03	26.3516	582.564	0.735655	1714.26	0	1535.08	1527.07	1.7952	0	1.52926
722	8664	35664	9.90667	2.40667	11.4067	25.4732	43.7423	15.4877	17.327	1.11763	999.012	1006.8	0.19822	4191.02	26.3572	582.937	0.735571	1715.17	0	1536.01	1527.99	1.79629	0	1.52926
723	8676	35676	9.91	2.41	11.41	25.4869	43.7671	15.4965	17.3369	1.11754	999.01	1006.8	0.19822	4191.01	26.3628	583.308	0.735488	1716.07	0	1536.93	1528.92	1.79738	0	1.52926
724	8688	35688	9.91333	2.41333	11.4133	25.5007	43.7919	15.5052	17.3468	1.11745	999.007	1006.81	0.19822	4191	26.3683	583.68	0.735405	1716.96	0	1537.86	1529.84	1.79846	0	1.52926
725	8700	35700	9.91667	2.41667	11.4167	25.5144	43.8166	15.514	17.3566	1.11737	999.005	1006.81	0.19822	4190.99	26.3739	584.051	0.735322	1717.86	0	1538.79	1530.77	1.79954	0	1.52926
726	8712	35712	9.92	2.42	11.42	25.5282	43.8413	15.5227	17.3665	1.11728	999.003	1006.81	0.19822	4190.99	26.3795	584.421	0.735239	1718.76	0	1539.71	1531.69	1.80062	0	1.52926
727	8724	35724	9.92333	2.42333	11.4233	25.5419	43.866	15.5315	17.3764	1.11719	999	1006.81	0.19822	4190.98	26.3851	584.791	0.735156	1719.65	0	1540.63	1532.61	1.8017	0	1.52926
728	8736	35736	9.92667	2.42667	11.4267	25.5556	43.8907	15.5403	17.3863	1.11711	998.998	1006.81	0.19822	4190.97	26.3906	585.16	0.735074	1720.54	0	1541.56	1533.53	1.80278	0	1.52926
729	8748	35748	9.93	2.43	11.43	25.5694	43.9154	15.549	17.3961	1.11702	998.996	1006.81	0.19822	4190.96	26.3962	585.529	0.734991	1721.44	0	1542.48	1534.45	1.80386	0	1.52926
730	8760	35760	9.93333	2.43333	11.4333	25.5831	43.94	15.5578	17.406	1.11693	998.994	1006.81	0.19822	4190.95	26.4018	585.898	0.734909	1722.33	0	1543.4	1535.37	1.80493	0	1.52926
731	8772	35772	9.93667	2.43667	11.4367	25.5968	43.9646	15.5666	17.4159	1.11685	998.991	1006.81	0.19822	4190.95	26.4073	586.265	0.734827	1723.21	0	1544.31	1536.28	1.80601	0	1.52926
732	8784	35784	9.94	2.44	11.44	25.6105	43.9892	15.5754	17.4258	1.11676	998.989	1006.81	0.19822	4190.94	26.4129	586.633	0.734745	1724.1	0	1545.23	1537.2	1.80708	0	1.52926
733	8796	35796	9.94333	2.44333	11.4433	25.6242	44.0138	15.5842	17.4357	1.11668	998.987	1006.82	0.19822	4190.93	26.4184	587	0.734663	1724.99	0	1546.15	1538.11	1.80815	0	1.52926
734	8808	35808	9.94667	2.44667	11.4467	25.6379	44.0384	15.593	17.4456	1.11659	998.984	1006.82	0.19822	4190.92	26.424	587.366	0.734581	1725.87	0	1547.06	1539.02	1.80922	0	1.52926
735	8820	35820	9.95	2.45	11.45	25.6516	44.0629	15.6018	17.4555	1.1165	998.982	1006.82	0.19822	4190.91	26.4295	587.732	0.734499	1726.75	0	1547.97	1539.93	1.81029	0	1.52926
736	8832	35832	9.95333	2.45333	11.4533	25.6653	44.0874	15.6106	17.4655	1.11642	998.98	1006.82	0.19822	4190.91	26.4351	588.097	0.734418	1727.63	0	1548.89	1540.84	1.81135	0	1.52926
737	8844	35844	9.95667	2.45667	11.4567	25.679	44.1119	15.6194	17.4754	1.11633	998.978	1006.82	0.19822	4190.9	26.4406	588.462	0.734336	1728.51	0	1549.8	1541.75	1.81242	0	1.52926
738	8856	35856	9.96	2.46	11.46	25.6927	44.1364	15.6283	17.4853	1.11625	998.975	1006.82	0.19822	4190.89	26.4462	588.826	0.734255	1729.39	0	1550.7	1542.65	1.81348	0	1.52926
739	8868	35868	9.96333	2.46333	11.4633	25.7064	44.1608	15.6371	17.4952	1.11616	998.973	1006.82	0.19822	4190.88	26.4517	589.189	0.734173	1730.27	0	1551.61	1543.56	1.81454	0	1.52926
740	8880	35880	9.96667	2.46667	11.4667	25.7201	44.1853	15.6459	17.5051	1.11607	998.971	1006.82	0.19822	4190.87	26.4572	589.553	0.734092	1731.14	0	1552.52	1544.46	1.8156	0	1.52926
741	8892	35892	9.97	2.47	11.47	25.7338	44.2097	15.6548	17.5151	1.11599	998.968	1006.82	0.19822	4190.87	26.4628	589.915	0.734011	1732.02	0	1553.42	1545.37	1.81666	0	1.52926
742	8904	35904	9.97333	2.47333	11.4733	25.7474	44.2341	15.6636	17.525	1.1159	998.966	1006.83	0.19822	4190.86	26.4683	590.278	0.73393	1732.89	0	1554.33	1546.27	1.81772	0	1.52926
743	8916	35916	9.97667	2.47667	11.4767	25.7611	44.2585	15.6725	17.5349	1.11582	998.964	1006.83	0.19822	4190.85	26.4738	590.639	0.733849	1733.76	0	1555.23	1547.17	1.81877	0	1.52926
744	8928	35928	9.98	2.48	11.48	25.7748	44.2828	15.6813	17.5449	1.11573	998.962	1006.83	0.19822	4190.84	26.4793	591	0.733769	1734.63	0	1556.13	1548.07	1.81983	0	1.52926
745	8940	35940	9.98333	2.48333	11.4833	25.7884	44.3072	15.6902	17.5548	1.11565	998.959	1006.83	0.19822	4190.83	26.4848	591.361	0.733688	1735.5	0	1557.03	1548.96	1.82088	0	1.52926
746	8952	35952	9.98667	2.48667	11.4867	25.8021	44.3315	15.699	17.5648	1.11556	998.957	1006.83	0.19822	4190.83	26.4903	591.721	0.733608	1736.36	0	1557.93	1549.86	1.82193	0	1.52926
747	8964	35964	9.99	2.49	11.49	25.8157	44.3558	15.7079	17.5747	1.11548	998.955	1006.83	0.19822	4190.82	26.4958	592.081	0.733527	1737.23	0	1558.83	1550.76	1.82298	0	1.52926
748	8976	35976	9.99333	2.49333	11.4933	25.8293	44.3801	15.7168	17.5847	1.11539	998.952	1006.83	0.19822	4190.81	26.5013	592.44	0.733447	1738.09	0	1559.72	1551.65	1.82403	0	1.52926
749	8988	35988	9.99667	2.49667	11.4967	25.843	44.4043	15.7257	17.5946	1.11531	998.95	1006.83	0.19822	4190.8	26.5068	592.798	0.733367	1738.95	0	1560.62	1552.54	1.82507	0	1.52926
750	9000	36000	10	2.5	11.5	25.8566	44.4286	15.7346	17.6046	1.11522	998.948	1006.83	0.19822	4190.79	26.5123	593.156	0.733287	1739.81	0	1561.51	1553.43	1.82612	0	1.52926
751	9012	36012	10.0033	2.50333	11.5033	25.8702	44.4528	15.7434	17.6146	1.11514	998.945	1006.83	0.19822	4190.79	26.5178	593.514	0.733207	1740.67	0	1562.4	1554.32	1.82716	0	1.52926
752	9024	36024	10.0067	2.50667	11.5067	25.8839	44.477	15.7523	17.6245	1.11505	998.943	1006.84	0.19822	4190.78	26.5233	593.871	0.733128	1741.53	0	1563.29	1555.21	1.8282	0	1.52926
753	9036	36036	10.01	2.51	11.51	25.8975	44.5011	15.7612	17.6345	1.11497	998.941	1006.84	0.19822	4190.77	26.5288	594.227	0.733048	1742.39	0	1564.18	1556.1	1.82924	0	1.52926
754	9048	36048	10.0133	2.51333	11.5133	25.9111	44.5253	15.7701	17.6445	1.11488	998.938	1006.84	0.19822	4190.76	26.5343	594.583	0.732968	1743.24	0	1565.07	1556.98	1.83028	0	1.52926
755	9060	36060	10.0167	2.51667	11.5167	25.9247	44.5494	15.7791	17.6544	1.1148	998.936	1006.84	0.19822	4190.75	26.5398	594.938	0.732889	1744.09	0	1565.96	1557.87	1.83132	0	1.52926
756	9072	36072	10.02	2.52	11.52	25.9383	44.5735	15.788	17.6644	1.11471	998.934	1006.84	0.19822	4190.75	26.5452	595.293	0.73281	1744.95	0	1566.84	1558.75	1.83235	0	1.52926
757	9084	36084	10.0233	2.52333	11.5233	25.9519	44.5976	15.7969	17.6744	1.11463	998.931	1006.84	0.19822	4190.74	26.5507	595.648	0.73273	1745.8	0	1567.73	1559.63	1.83339	0	1.52926
758	9096	36096	10.0267	2.52667	11.5267	25.9655	44.6217	15.8058	17.6844	1.11455	998.929	1006.84	0.19822	4190.73	26.5562	596.001	0.732651	1746.64	0	1568.61	1560.51	1.83442	0	1.52926
759	9108	36108	10.03	2.53	11.53	25.9791	44.6458	15.8147	17.6944	1.11446	998.927	1006.84	0.19822	4190.72	26.5616	596.355	0.732572	1747.49	0	1569.49	1561.39	1.83545	0	1.52926
760	9120	36120	10.0333	2.53333	11.5333	25.9927	44.6698	15.8237	17.7044	1.11438	998.924	1006.84	0.19822	4190.71	26.5671	596.707	0.732494	1748.34	0	1570.37	1562.27	1.83648	0	1.52926
761	9132	36132	10.0367	2.53667	11.5367	26.0062	44.6938	15.8326	17.7144	1.11429	998.922	1006.85	0.19822	4190.71	26.5725	597.06	0.732415	1749.18	0	1571.25	1563.15	1.83751	0	1.52926
762	9144	36144	10.04	2.54	11.54	26.0198	44.7178	15.8416	17.7244	1.11421	998.92	1006.85	0.19822	4190.7	26.578	597.411	0.732336	1750.02	0	1572.13	1564.02	1.83854	0	1.52926
763	9156	36156	10.0433	2.54333	11.5433	26.0334	44.7418	15.8505	17.7344	1.11413	998.917	1006.85	0.19822	4190.69	26.5835	597.763	0.732258	1750.86	0	1573.01	1564.9	1.83956	0	1.52926
764	9168	36168	10.0467	2.54667	11.5467	26.0469	44.7657	15.8595	17.7444	1.11404	998.915	1006.85	0.19822	4190.68	26.5889	598.113	0.732179	1751.7	0	1573.88	1565.77	1.84058	0	1.52926
765	9180	36180	10.05	2.55	11.55	26.0605	44.7896	15.8684	17.7544	1.11396	998.913	1006.85	0.19822	4190.67	26.5943	598.463	0.732101	1752.54	0	1574.75	1566.64	1.84161	0	1.52926
766	9192	36192	10.0533	2.55333	11.5533	26.074	44.8135	15.8774	17.7644	1.11388	998.91	1006.85	0.19822	4190.67	26.5998	598.813	0.732023	1753.38	0	1575.63	1567.51	1.84263	0	1.52926
767	9204	36204	10.0567	2.55667	11.5567	26.0876	44.8374	15.8864	17.7745	1.11379	998.908	1006.85	0.19822	4190.66	26.6052	599.162	0.731945	1754.21	0	1576.5	1568.38	1.84364	0	1.52926
768	9216	36216	10.06	2.56	11.56	26.1011	44.8613	15.8953	17.7845	1.11371	998.906	1006.85	0.19822	4190.65	26.6106	599.511	0.731867	1755.05	0	1577.37	1569.25	1.84466	0	1.52926
769	9228	36228	10.0633	2.56333	11.5633	26.1147	44.8851	15.9043	17.7945	1.11363	998.903	1006.85	0.19822	4190.64	26.6161	599.859	0.731789	1755.88	0	1578.24	1570.11	1.84568	0	1.52926
770	9240	36240	10.0667	2.56667	11.5667	26.1282	44.909	15.9133	17.8045	1.11354	998.901	1006.86	0.19822	4190.63	26.6215	600.206	0.731711	1756.71	0	1579.1	1570.98	1.84669	0	1.52926
771	9252	36252	10.07	2.57	11.57	26.1417	44.9328	15.9223	17.8146	1.11346	998.899	1006.86	0.19822	4190.63	26.6269	600.553	0.731633	1757.54	0	1579.97	1571.84	1.8477	0	1.52926
772	9264	36264	10.0733	2.57333	11.5733	26.1553	44.9565	15.9313	17.8246	1.11338	998.896	1006.86	0.19822	4190.62	26.6323	600.9	0.731556	1758.37	0	1580.83	1572.7	1.84871	0	1.52926
773	9276	36276	10.0767	2.57667	11.5767	26.1688	44.9803	15.9403	17.8346	1.11329	998.894	1006.86	0.19822	4190.61	26.6378	601.246	0.731478	1759.19	0	1581.7	1573.56	1.84972	0	1.52926
774	9288	36288	10.08	2.58	11.58	26.1823	45.004	15.9493	17.8447	1.11321	998.892	1006.86	0.19822	4190.6	26.6432	601.591	0.731401	1760.02	0	1582.56	1574.42	1.85073	0	1.52926
775	9300	36300	10.0833	2.58333	11.5833	26.1958	45.0278	15.9583	17.8547	1.11313	998.889	1006.86	0.19822	4190.59	26.6486	601.936	0.731324	1760.84	0	1583.42	1575.28	1.85174	0	1.52926
776	9312	36312	10.0867	2.58667	11.5867	26.2093	45.0515	15.9673	17.8648	1.11305	998.887	1006.86	0.19822	4190.59	26.654	602.28	0.731247	1761.66	0	1584.28	1576.14	1.85274	0	1.52926
777	9324	36324	10.09	2.59	11.59	26.2228	45.0751	15.9763	17.8748	1.11296	998.885	1006.86	0.19822	4190.58	26.6594	602.624	0.73117	1762.48	0	1585.13	1576.99	1.85374	0	1.52926
778	9336	36336	10.0933	2.59333	11.5933	26.2363	45.0988	15.9854	17.8849	1.11288	998.882	1006.86	0.19822	4190.57	26.6648	602.967	0.731093	1763.3	0	1585.99	1577.85	1.85474	0	1.52926
779	9348	36348	10.0967	2.59667	11.5967	26.2498	45.1224	15.9944	17.8949	1.1128	998.88	1006.87	0.19822	4190.56	26.6702	603.31	0.731016	1764.12	0	1586.84	1578.7	1.85574	0	1.52926
780	9360	36360	10.1	2.6	11.6	26.2633	45.146	16.0034	17.905	1.11272	998.878	1006.87	0.19822	4190.55	26.6756	603.652	0.730939	1764.93	0	1587.7	1579.55	1.85674	0	1.52926
781	9372	36372	10.1033	2.60333	11.6033	26.2767	45.1696	16.0125	17.9151	1.11263	998.875	1006.87	0.19822	4190.55	26.681	603.994	0.730863	1765.75	0	1588.55	1580.4	1.85774	0	1.52926
782	9384	36384	10.1067	2.60667	11.6067	26.2902	45.1932	16.0215	17.9251	1.11255	998.873	1006.87	0.19822	4190.54	26.6863	604.335	0.730786	1766.56	0	1589.4	1581.25	1.85873	0	1.52926
783	9396	36396	10.11	2.61	11.61	26.3037	45.2167	16.0305	17.9352	1.11247	998.87	1006.87	0.19822	4190.53	26.6917	604.676	0.73071	1767.37	0	1590.25	1582.1	1.85973	0	1.52926
784	9408	36408	10.1133	2.61333	11.6133	26.3171	45.2403	16.0396	17.9453	1.11239	998.868	1006.87	0.19822	4190.52	26.6971	605.016	0.730634	1768.18	0	1591.1	1582.94	1.86072	0	1.52926
785	9420	36420	10.1167	2.61667	11.6167	26.3306	45.2638	16.0487	17.9554	1.11231	998.866	1006.87	0.19822	4190.51	26.7025	605.355	0.730557	1768.99	0	1591.94	1583.79	1.86171	0	1.52926
786	9432	36432	10.12	2.62	11.62	26.344	45.2873	16.0577	17.9654	1.11222	998.863	1006.87	0.19822	4190.5	26.7078	605.694	0.730481	1769.79	0	1592.79	1584.63	1.8627	0	1.52926
787	9444	36444	10.1233	2.62333	11.6233	26.3575	45.3107	16.0668	17.9755	1.11214	998.861	1006.87	0.19822	4190.5	26.7132	606.033	0.730405	1770.6	0	1593.63	1585.47	1.86368	0	1.52926
788	9456	36456	10.1267	2.62667	11.6267	26.3709	45.3342	16.0759	17.9856	1.11206	998.859	1006.88	0.19822	4190.49	26.7186	606.371	0.73033	1771.4	0	1594.48	1586.31	1.86467	0	1.52926
789	9468	36468	10.13	2.63	11.63	26.3844	45.3576	16.0849	17.9957	1.11198	998.856	1006.88	0.19822	4190.48	26.7239	606.708	0.730254	1772.2	0	1595.32	1587.15	1.86565	0	1.52926
790	9480	36480	10.1333	2.63333	11.6333	26.3978	45.381	16.094	18.0058	1.1119	998.854	1006.88	0.19822	4190.47	26.7293	607.045	0.730178	1773	0	1596.16	1587.99	1.86664	0	1.52926
791	9492	36492	10.1367	2.63667	11.6367	26.4112	45.4044	16.1031	18.0159	1.11182	998.851	1006.88	0.19822	4190.46	26.7346	607.382	0.730103	1773.8	0	1597	1588.83	1.86762	0	1.52926
792	9504	36504	10.14	2.64	11.64	26.4246	45.4277	16.1122	18.026	1.11173	998.849	1006.88	0.19822	4190.46	26.74	607.717	0.730027	1774.6	0	1597.83	1589.66	1.8686	0	1.52926
793	9516	36516	10.1433	2.64333	11.6433	26.438	45.451	16.1213	18.0361	1.11165	998.847	1006.88	0.19822	4190.45	26.7453	608.053	0.729952	1775.4	0	1598.67	1590.5	1.86957	0	1.52926
794	9528	36528	10.1467	2.64667	11.6467	26.4514	45.4743	16.1304	18.0462	1.11157	998.844	1006.88	0.19822	4190.44	26.7507	608.387	0.729877	1776.19	0	1599.5	1591.33	1.87055	0	1.52926
795	9540	36540	10.15	2.65	11.65	26.4648	45.4976	16.1395	18.0563	1.11149	998.842	1006.88	0.19822	4190.43	26.756	608.722	0.729801	1776.98	0	1600.34	1592.16	1.87152	0	1.52926
796	9552	36552	10.1533	2.65333	11.6533	26.4782	45.5209	16.1486	18.0664	1.11141	998.839	1006.88	0.19822	4190.42	26.7613	609.055	0.729726	1777.77	0	1601.17	1592.99	1.8725	0	1.52926
797	9564	36564	10.1567	2.65667	11.6567	26.4916	45.5442	16.1577	18.0765	1.11133	998.837	1006.89	0.19822	4190.42	26.7667	609.388	0.729651	1778.56	0	1602	1593.82	1.87347	0	1.52926
798	9576	36576	10.16	2.66	11.66	26.505	45.5674	16.1668	18.0866	1.11125	998.835	1006.89	0.19822	4190.41	26.772	609.721	0.729577	1779.35	0	1602.83	1594.65	1.87444	0	1.52926
799	9588	36588	10.1633	2.66333	11.6633	26.5184	45.5906	16.1759	18.0968	1.11117	998.832	1006.89	0.19822	4190.4	26.7773	610.053	0.729502	1780.14	0	1603.65	1595.47	1.8754	0	1.52926
800	9600	36600	10.1667	2.66667	11.6667	26.5318	45.6138	16.1851	18.1069	1.11109	998.83	1006.89	0.19822	4190.39	26.7826	610.385	0.729427	1780.92	0	1604.48	1596.3	1.87637	0	1.52926
801	9612	36612	10.17	2.67	11.67	26.5452	45.6369	16.1942	18.117	1.11101	998.827	1006.89	0.19822	4190.38	26.7879	610.715	0.729353	1781.71	0	1605.31	1597.12	1.87733	0	1.52926
802	9624	36624	10.1733	2.67333	11.6733	26.5585	45.6601	16.2033	18.1271	1.11093	998.825	1006.89	0.19822	4190.38	26.7932	611.046	0.729278	1782.49	0	1606.13	1597.94	1.8783	0	1.52926
803	9636	36636	10.1767	2.67667	11.6767	26.5719	45.6832	16.2125	18.1373	1.11084	998.823	1006.89	0.19822	4190.37	26.7985	611.376	0.729204	1783.27	0	1606.95	1598.76	1.87926	0	1.52926
804	9648	36648	10.18	2.68	11.68	26.5852	45.7063	16.2216	18.1474	1.11076	998.82	1006.89	0.19822	4190.36	26.8039	611.705	0.72913	1784.05	0	1607.77	1599.58	1.88022	0	1.52926
805	9660	36660	10.1833	2.68333	11.6833	26.5986	45.7293	16.2308	18.1576	1.11068	998.818	1006.89	0.19822	4190.35	26.8092	612.034	0.729055	1784.83	0	1608.59	1600.4	1.88118	0	1.52926
806	9672	36672	10.1867	2.68667	11.6867	26.6119	45.7524	16.2399	18.1677	1.1106	998.815	1006.89	0.19822	4190.34	26.8144	612.362	0.728981	1785.6	0	1609.41	1601.21	1.88213	0	1.52926
807	9684	36684	10.19	2.69	11.69	26.6253	45.7754	16.2491	18.1778	1.11052	998.813	1006.9	0.19822	4190.34	26.8197	612.69	0.728907	1786.38	0	1610.23	1602.03	1.88309	0	1.52926
808	9696	36696	10.1933	2.69333	11.6933	26.6386	45.7984	16.2583	18.188	1.11044	998.811	1006.9	0.19822	4190.33	26.825	613.017	0.728834	1787.15	0	1611.04	1602.84	1.88404	0	1.52926
809	9708	36708	10.1967	2.69667	11.6967	26.6519	45.8214	16.2674	18.1981	1.11036	998.808	1006.9	0.19822	4190.32	26.8303	613.344	0.72876	1787.92	0	1611.85	1603.65	1.88499	0	1.52926
810	9720	36720	10.2	2.7	11.7	26.6652	45.8444	16.2766	18.2083	1.11028	998.806	1006.9	0.19822	4190.31	26.8356	613.67	0.728686	1788.69	0	1612.67	1604.46	1.88594	0	1.52926
811	9732	36732	10.2033	2.70333	11.7033	26.6786	45.8673	16.2858	18.2184	1.1102	998.803	1006.9	0.19822	4190.3	26.8409	613.996	0.728613	1789.46	0	1613.48	1605.27	1.88689	0	1.52926
812	9744	36744	10.2067	2.70667	11.7067	26.6919	45.8902	16.295	18.2286	1.11013	998.801	1006.9	0.19822	4190.29	26.8462	614.321	0.728539	1790.23	0	1614.29	1606.08	1.88784	0	1.52926
813	9756	36756	10.21	2.71	11.71	26.7052	45.9131	16.3042	18.2388	1.11005	998.799	1006.9	0.19822	4190.29	26.8514	614.645	0.728466	1790.99	0	1615.1	1606.88	1.88878	0	1.52926
814	9768	36768	10.2133	2.71333	11.7133	26.7185	45.936	16.3133	18.2489	1.10997	998.796	1006.9	0.19822	4190.28	26.8567	614.969	0.728393	1791.76	0	1615.9	1607.69	1.88973	0	1.52926
815	9780	36780	10.2167	2.71667	11.7167	26.7318	45.9588	16.3225	18.2591	1.10989	998.794	1006.9	0.19822	4190.27	26.862	615.292	0.728319	1792.52	0	1616.71	1608.49	1.89067	0	1.52926
816	9792	36792	10.22	2.72	11.72	26.745	45.9817	16.3317	18.2693	1.10981	998.791	1006.91	0.19822	4190.26	26.8672	615.615	0.728246	1793.28	0	1617.51	1609.3	1.89161	0	1.52926
817	9804	36804	10.2233	2.72333	11.7233	26.7583	46.0045	16.341	18.2794	1.10973	998.789	1006.91	0.19822	4190.25	26.8725	615.938	0.728173	1794.04	0	1618.31	1610.1	1.89255	0	1.52926
818	9816	36816	10.2267	2.72667	11.7267	26.7716	46.0273	16.3502	18.2896	1.10965	998.786	1006.91	0.19822	4190.25	26.8777	616.259	0.7281	1794.79	0	1619.11	1610.9	1.89348	0	1.52926
819	9828	36828	10.23	2.73	11.73	26.7849	46.05	16.3594	18.2998	1.10957	998.784	1006.91	0.19822	4190.24	26.883	616.58	0.728028	1795.55	0	1619.91	1611.69	1.89442	0	1.52926
820	9840	36840	10.2333	2.73333	11.7333	26.7981	46.0728	16.3686	18.31	1.10949	998.782	1006.91	0.19822	4190.23	26.8882	616.901	0.727955	1796.3	0	1620.71	1612.49	1.89535	0	1.52926
821	9852	36852	10.2367	2.73667	11.7367	26.8114	46.0955	16.3778	18.3202	1.10941	998.779	1006.91	0.19822	4190.22	26.8935	617.221	0.727882	1797.06	0	1621.51	1613.28	1.89628	0	1.52926
822	9864	36864	10.24	2.74	11.74	26.8247	46.1182	16.3871	18.3304	1.10933	998.777	1006.91	0.19822	4190.21	26.8987	617.541	0.72781	1797.81	0	1622.31	1614.08	1.89721	0	1.52926
823	9876	36876	10.2433	2.74333	11.7433	26.8379	46.1408	16.3963	18.3405	1.10926	998.774	1006.91	0.19822	4190.21	26.9039	617.86	0.727737	1798.56	0	1623.1	1614.87	1.89814	0	1.52926
824	9888	36888	10.2467	2.74667	11.7467	26.8511	46.1635	16.4055	18.3507	1.10918	998.772	1006.91	0.19822	4190.2	26.9092	618.178	0.727665	1799.31	0	1623.89	1615.66	1.89907	0	1.52926
825	9900	36900	10.25	2.75	11.75	26.8644	46.1861	16.4148	18.3609	1.1091	998.769	1006.92	0.19822	4190.19	26.9144	618.496	0.727593	1800.05	0	1624.68	1616.45	1.89999	0	1.52926
826	9912	36912	10.2533	2.75333	11.7533	26.8776	46.2087	16.424	18.3711	1.10902	998.767	1006.92	0.19822	4190.18	26.9196	618.814	0.727521	1800.8	0	1625.47	1617.24	1.90092	0	1.52926
827	9924	36924	10.2567	2.75667	11.7567	26.8908	46.2313	16.4333	18.3813	1.10894	998.765	1006.92	0.19822	4190.17	26.9248	619.131	0.727449	1801.54	0	1626.26	1618.03	1.90184	0	1.52926
828	9936	36936	10.26	2.76	11.76	26.9041	46.2539	16.4425	18.3915	1.10886	998.762	1006.92	0.19822	4190.17	26.93	619.447	0.727377	1802.28	0	1627.05	1618.81	1.90276	0	1.52926
829	9948	36948	10.2633	2.76333	11.7633	26.9173	46.2764	16.4518	18.4017	1.10879	998.76	1006.92	0.19822	4190.16	26.9353	619.763	0.727305	1803.02	0	1627.83	1619.6	1.90368	0	1.52926
830	9960	36960	10.2667	2.76667	11.7667	26.9305	46.2989	16.461	18.412	1.10871	998.757	1006.92	0.19822	4190.15	26.9405	620.078	0.727233	1803.76	0	1628.62	1620.38	1.9046	0	1.52926
831	9972	36972	10.27	2.77	11.77	26.9437	46.3214	16.4703	18.4222	1.10863	998.755	1006.92	0.19822	4190.14	26.9457	620.392	0.727161	1804.5	0	1629.4	1621.16	1.90551	0	1.52926
832	9984	36984	10.2733	2.77333	11.7733	26.9569	46.3439	16.4796	18.4324	1.10855	998.752	1006.92	0.19822	4190.13	26.9509	620.707	0.72709	1805.24	0	1630.18	1621.94	1.90643	0	1.52926
833	9996	36996	10.2767	2.77667	11.7767	26.9701	46.3663	16.4889	18.4426	1.10847	998.75	1006.92	0.19822	4190.13	26.9561	621.02	0.727018	1805.97	0	1630.96	1622.72	1.90734	0	1.52926
834	10008	37008	10.28	2.78	11.78	26.9832	46.3887	16.4981	18.4528	1.1084	998.747	1006.92	0.19822	4190.12	26.9613	621.333	0.726947	1806.7	0	1631.74	1623.49	1.90825	0	1.52926
835	10020	37020	10.2833	2.78333	11.7833	26.9964	46.4111	16.5074	18.463	1.10832	998.745	1006.93	0.19822	4190.11	26.9664	621.646	0.726875	1807.44	0	1632.52	1624.27	1.90916	0	1.52926
836	10032	37032	10.2867	2.78667	11.7867	27.0096	46.4335	16.5167	18.4733	1.10824	998.742	1006.93	0.19822	4190.1	26.9716	621.957	0.726804	1808.16	0	1633.29	1625.04	1.91006	0	1.52926
837	10044	37044	10.29	2.79	11.79	27.0228	46.4559	16.526	18.4835	1.10816	998.74	1006.93	0.19822	4190.09	26.9768	622.269	0.726733	1808.89	0	1634.07	1625.82	1.91097	0	1.52926
838	10056	37056	10.2933	2.79333	11.7933	27.0359	46.4782	16.5353	18.4937	1.10809	998.738	1006.93	0.19822	4190.08	26.982	622.58	0.726662	1809.62	0	1634.84	1626.59	1.91187	0	1.52926
839	10068	37068	10.2967	2.79667	11.7967	27.0491	46.5005	16.5446	18.504	1.10801	998.735	1006.93	0.19822	4190.08	26.9872	622.89	0.726591	1810.34	0	1635.61	1627.36	1.91278	0	1.52926
840	10080	37080	10.3	2.8	11.8	27.0622	46.5228	16.5539	18.5142	1.10793	998.733	1006.93	0.19822	4190.07	26.9923	623.2	0.72652	1811.07	0	1636.38	1628.12	1.91368	0	1.52926
841	10092	37092	10.3033	2.80333	11.8033	27.0754	46.545	16.5632	18.5244	1.10785	998.73	1006.93	0.19822	4190.06	26.9975	623.509	0.726449	1811.79	0	1637.15	1628.89	1.91458	0	1.52926
842	10104	37104	10.3067	2.80667	11.8067	27.0885	46.5673	16.5726	18.5347	1.10778	998.728	1006.93	0.19822	4190.05	27.0027	623.817	0.726379	1812.51	0	1637.92	1629.66	1.91547	0	1.52926
843	10116	37116	10.31	2.81	11.81	27.1016	46.5895	16.5819	18.5449	1.1077	998.725	1006.93	0.19822	4190.04	27.0078	624.125	0.726308	1813.23	0	1638.68	1630.42	1.91637	0	1.52926
844	10128	37128	10.3133	2.81333	11.8133	27.1148	46.6117	16.5912	18.5552	1.10762	998.723	1006.94	0.19822	4190.04	27.013	624.433	0.726237	1813.95	0	1639.45	1631.18	1.91726	0	1.52926
845	10140	37140	10.3167	2.81667	11.8167	27.1279	46.6339	16.6005	18.5654	1.10755	998.72	1006.94	0.19822	4190.03	27.0181	624.74	0.726167	1814.66	0	1640.21	1631.94	1.91815	0	1.52926
846	10152	37152	10.32	2.82	11.82	27.141	46.656	16.6099	18.5757	1.10747	998.718	1006.94	0.19822	4190.02	27.0233	625.046	0.726097	1815.38	0	1640.97	1632.7	1.91904	0	1.52926
847	10164	37164	10.3233	2.82333	11.8233	27.1541	46.6781	16.6192	18.5859	1.10739	998.715	1006.94	0.19822	4190.01	27.0284	625.352	0.726026	1816.09	0	1641.73	1633.46	1.91993	0	1.52926
848	10176	37176	10.3267	2.82667	11.8267	27.1672	46.7002	16.6285	18.5962	1.10732	998.713	1006.94	0.19822	4190	27.0336	625.657	0.725956	1816.8	0	1642.49	1634.22	1.92082	0	1.52926
849	10188	37188	10.33	2.83	11.83	27.1803	46.7223	16.6379	18.6065	1.10724	998.71	1006.94	0.19822	4190	27.0387	625.962	0.725886	1817.51	0	1643.25	1634.97	1.9217	0	1.52926
850	10200	37200	10.3333	2.83333	11.8333	27.1934	46.7444	16.6472	18.6167	1.10716	998.708	1006.94	0.19822	4189.99	27.0438	626.266	0.725816	1818.22	0	1644	1635.73	1.92259	0	1.52926
851	10212	37212	10.3367	2.83667	11.8367	27.2065	46.7664	16.6566	18.627	1.10709	998.705	1006.94	0.19822	4189.98	27.049	626.57	0.725746	1818.92	0	1644.76	1636.48	1.92347	0	1.52926
852	10224	37224	10.34	2.84	11.84	27.2195	46.7884	16.666	18.6372	1.10701	998.703	1006.94	0.19822	4189.97	27.0541	626.873	0.725676	1819.63	0	1645.51	1637.23	1.92435	0	1.52926
853	10236	37236	10.3433	2.84333	11.8433	27.2326	46.8104	16.6753	18.6475	1.10694	998.7	1006.94	0.19822	4189.96	27.0592	627.175	0.725607	1820.33	0	1646.26	1637.98	1.92523	0	1.52926
854	10248	37248	10.3467	2.84667	11.8467	27.2457	46.8324	16.6847	18.6578	1.10686	998.698	1006.95	0.19822	4189.95	27.0643	627.477	0.725537	1821.03	0	1647.01	1638.73	1.92611	0	1.52926
855	10260	37260	10.35	2.85	11.85	27.2587	46.8543	16.6941	18.6681	1.10678	998.696	1006.95	0.19822	4189.95	27.0694	627.779	0.725467	1821.73	0	1647.76	1639.48	1.92698	0	1.52926
856	10272	37272	10.3533	2.85333	11.8533	27.2718	46.8762	16.7034	18.6783	1.10671	998.693	1006.95	0.19822	4189.94	27.0745	628.079	0.725398	1822.43	0	1648.51	1640.22	1.92785	0	1.52926
857	10284	37284	10.3567	2.85667	11.8567	27.2848	46.8981	16.7128	18.6886	1.10663	998.691	1006.95	0.19822	4189.93	27.0797	628.38	0.725329	1823.13	0	1649.25	1640.97	1.92873	0	1.52926
858	10296	37296	10.36	2.86	11.86	27.2979	46.92	16.7222	18.6989	1.10656	998.688	1006.95	0.19822	4189.92	27.0848	628.679	0.725259	1823.82	0	1650	1641.71	1.9296	0	1.52926
859	10308	37308	10.3633	2.86333	11.8633	27.3109	46.9418	16.7316	18.7092	1.10648	998.686	1006.95	0.19822	4189.91	27.0899	628.978	0.72519	1824.52	0	1650.74	1642.45	1.93047	0	1.52926
860	10320	37320	10.3667	2.86667	11.8667	27.3239	46.9636	16.741	18.7195	1.10641	998.683	1006.95	0.19822	4189.91	27.0949	629.277	0.725121	1825.21	0	1651.48	1643.19	1.93133	0	1.52926
861	10332	37332	10.37	2.87	11.87	27.337	46.9854	16.7504	18.7298	1.10633	998.681	1006.95	0.19822	4189.9	27.1	629.575	0.725052	1825.9	0	1652.22	1643.93	1.9322	0	1.52926
862	10344	37344	10.3733	2.87333	11.8733	27.35	47.0072	16.7598	18.7401	1.10626	998.678	1006.95	0.19822	4189.89	27.1051	629.873	0.724983	1826.59	0	1652.96	1644.66	1.93306	0	1.52926
863	10356	37356	10.3767	2.87667	11.8767	27.363	47.029	16.7692	18.7504	1.10618	998.676	1006.95	0.19822	4189.88	27.1102	630.169	0.724914	1827.27	0	1653.69	1645.4	1.93392	0	1.52926
864	10368	37368	10.38	2.88	11.88	27.376	47.0507	16.7786	18.7607	1.10611	998.673	1006.96	0.19822	4189.87	27.1153	630.466	0.724845	1827.96	0	1654.43	1646.13	1.93478	0	1.52926
865	10380	37380	10.3833	2.88333	11.8833	27.389	47.0724	16.788	18.771	1.10603	998.671	1006.96	0.19822	4189.87	27.1204	630.762	0.724776	1828.64	0	1655.16	1646.87	1.93564	0	1.52926
866	10392	37392	10.3867	2.88667	11.8867	27.402	47.0941	16.7974	18.7813	1.10596	998.668	1006.96	0.19822	4189.86	27.1254	631.057	0.724708	1829.33	0	1655.9	1647.6	1.9365	0	1.52926
867	10404	37404	10.39	2.89	11.89	27.415	47.1157	16.8068	18.7916	1.10588	998.666	1006.96	0.19822	4189.85	27.1305	631.352	0.724639	1830.01	0	1656.63	1648.33	1.93735	0	1.52926
868	10416	37416	10.3933	2.89333	11.8933	27.428	47.1374	16.8163	18.8019	1.10581	998.663	1006.96	0.19822	4189.84	27.1356	631.646	0.724571	1830.69	0	1657.36	1649.05	1.9382	0	1.52926
869	10428	37428	10.3967	2.89667	11.8967	27.4409	47.159	16.8257	18.8122	1.10573	998.661	1006.96	0.19822	4189.83	27.1406	631.939	0.724502	1831.37	0	1658.08	1649.78	1.93906	0	1.52926
870	10440	37440	10.4	2.9	11.9	27.4539	47.1806	16.8351	18.8225	1.10566	998.658	1006.96	0.19822	4189.82	27.1457	632.232	0.724434	1832.04	0	1658.81	1650.51	1.9399	0	1.52926
871	10452	37452	10.4033	2.90333	11.9033	27.4668	47.2021	16.8446	18.8328	1.10558	998.656	1006.96	0.19822	4189.82	27.1507	632.525	0.724366	1832.72	0	1659.54	1651.23	1.94075	0	1.52926
872	10464	37464	10.4067	2.90667	11.9067	27.4798	47.2237	16.854	18.8431	1.10551	998.653	1006.96	0.19822	4189.81	27.1558	632.816	0.724298	1833.39	0	1660.26	1651.95	1.9416	0	1.52926
873	10476	37476	10.41	2.91	11.91	27.4928	47.2452	16.8635	18.8534	1.10543	998.65	1006.97	0.19822	4189.8	27.1608	633.108	0.72423	1834.06	0	1660.98	1652.67	1.94244	0	1.52926
874	10488	37488	10.4133	2.91333	11.9133	27.5057	47.2667	16.8729	18.8638	1.10536	998.648	1006.97	0.19822	4189.79	27.1659	633.399	0.724162	1834.73	0	1661.7	1653.39	1.94329	0	1.52926
875	10500	37500	10.4167	2.91667	11.9167	27.5186	47.2881	16.8824	18.8741	1.10529	998.645	1006.97	0.19822	4189.78	27.1709	633.689	0.724094	1835.4	0	1662.42	1654.11	1.94413	0	1.52926
876	10512	37512	10.42	2.92	11.92	27.5316	47.3096	16.8918	18.8844	1.10521	998.643	1006.97	0.19822	4189.78	27.1759	633.978	0.724026	1836.07	0	1663.14	1654.83	1.94497	0	1.52926
877	10524	37524	10.4233	2.92333	11.9233	27.5445	47.331	16.9013	18.8947	1.10514	998.64	1006.97	0.19822	4189.77	27.181	634.267	0.723958	1836.73	0	1663.85	1655.54	1.9458	0	1.52926
878	10536	37536	10.4267	2.92667	11.9267	27.5574	47.3524	16.9108	18.9051	1.10506	998.638	1006.97	0.19822	4189.76	27.186	634.556	0.72389	1837.4	0	1664.57	1656.25	1.94664	0	1.52926
879	10548	37548	10.43	2.93	11.93	27.5703	47.3738	16.9202	18.9154	1.10499	998.635	1006.97	0.19822	4189.75	27.191	634.844	0.723823	1838.06	0	1665.28	1656.97	1.94747	0	1.52926
880	10560	37560	10.4333	2.93333	11.9333	27.5832	47.3951	16.9297	18.9257	1.10492	998.633	1006.97	0.19822	4189.74	27.196	635.131	0.723755	1838.72	0	1665.99	1657.68	1.94831	0	1.52926
881	10572	37572	10.4367	2.93667	11.9367	27.5961	47.4164	16.9392	18.9361	1.10484	998.63	1006.97	0.19822	4189.74	27.201	635.418	0.723688	1839.38	0	1666.7	1658.39	1.94914	0	1.52926
882	10584	37584	10.44	2.94	11.94	27.609	47.4377	16.9487	18.9464	1.10477	998.628	1006.97	0.19822	4189.73	27.206	635.704	0.723621	1840.03	0	1667.41	1659.09	1.94997	0	1.52926
883	10596	37596	10.4433	2.94333	11.9433	27.6219	47.459	16.9582	18.9567	1.1047	998.625	1006.98	0.19822	4189.72	27.211	635.99	0.723553	1840.69	0	1668.12	1659.8	1.95079	0	1.52926
884	10608	37608	10.4467	2.94667	11.9467	27.6348	47.4803	16.9676	18.9671	1.10462	998.623	1006.98	0.19822	4189.71	27.216	636.275	0.723486	1841.34	0	1668.83	1660.5	1.95162	0	1.52926
885	10620	37620	10.45	2.95	11.95	27.6476	47.5015	16.9771	18.9774	1.10455	998.62	1006.98	0.19822	4189.7	27.221	636.56	0.723419	1842	0	1669.53	1661.21	1.95244	0	1.52926
886	10632	37632	10.4533	2.95333	11.9533	27.6605	47.5227	16.9866	18.9878	1.10448	998.618	1006.98	0.19822	4189.69	27.226	636.843	0.723352	1842.65	0	1670.23	1661.91	1.95326	0	1.52926
887	10644	37644	10.4567	2.95667	11.9567	27.6733	47.5439	16.9961	18.9981	1.10441	998.615	1006.98	0.19822	4189.69	27.231	637.127	0.723285	1843.3	0	1670.94	1662.61	1.95408	0	1.52926
888	10656	37656	10.46	2.96	11.96	27.6862	47.565	17.0057	19.0085	1.10433	998.613	1006.98	0.19822	4189.68	27.236	637.41	0.723218	1843.95	0	1671.64	1663.31	1.9549	0	1.52926
889	10668	37668	10.4633	2.96333	11.9633	27.699	47.5861	17.0152	19.0188	1.10426	998.61	1006.98	0.19822	4189.67	27.241	637.692	0.723151	1844.59	0	1672.33	1664	1.95572	0	1.52926
890	10680	37680	10.4667	2.96667	11.9667	27.7119	47.6073	17.0247	19.0292	1.10419	998.608	1006.98	0.19822	4189.66	27.246	637.974	0.723085	1845.24	0	1673.03	1664.7	1.95653	0	1.52926
891	10692	37692	10.47	2.97	11.97	27.7247	47.6283	17.0342	19.0396	1.10411	998.605	1006.98	0.19822	4189.65	27.2509	638.255	0.723018	1845.88	0	1673.73	1665.39	1.95735	0	1.52926
892	10704	37704	10.4733	2.97333	11.9733	27.7375	47.6494	17.0437	19.0499	1.10404	998.602	1006.98	0.19822	4189.65	27.2559	638.535	0.722951	1846.52	0	1674.42	1666.09	1.95816	0	1.52926
893	10716	37716	10.4767	2.97667	11.9767	27.7504	47.6704	17.0532	19.0603	1.10397	998.6	1006.99	0.19822	4189.64	27.2609	638.815	0.722885	1847.16	0	1675.11	1666.78	1.95897	0	1.52926
894	10728	37728	10.48	2.98	11.98	27.7632	47.6914	17.0628	19.0706	1.1039	998.597	1006.99	0.19822	4189.63	27.2658	639.095	0.722819	1847.8	0	1675.8	1667.47	1.95978	0	1.52926
895	10740	37740	10.4833	2.98333	11.9833	27.776	47.7124	17.0723	19.081	1.10382	998.595	1006.99	0.19822	4189.62	27.2708	639.374	0.722752	1848.44	0	1676.49	1668.16	1.96058	0	1.52926
896	10752	37752	10.4867	2.98667	11.9867	27.7888	47.7334	17.0818	19.0914	1.10375	998.592	1006.99	0.19822	4189.61	27.2757	639.652	0.722686	1849.07	0	1677.18	1668.84	1.96139	0	1.52926
897	10764	37764	10.49	2.99	11.99	27.8016	47.7543	17.0914	19.1017	1.10368	998.59	1006.99	0.19822	4189.61	27.2807	639.93	0.72262	1849.7	0	1677.87	1669.53	1.96219	0	1.52926
898	10776	37776	10.4933	2.99333	11.9933	27.8144	47.7752	17.1009	19.1121	1.10361	998.587	1006.99	0.19822	4189.6	27.2856	640.207	0.722554	1850.34	0	1678.55	1670.21	1.96299	0	1.52926
899	10788	37788	10.4967	2.99667	11.9967	27.8271	47.7961	17.1105	19.1225	1.10354	998.585	1006.99	0.19822	4189.59	27.2906	640.483	0.722488	1850.97	0	1679.24	1670.89	1.96379	0	1.52926
900	10800	37800	10.5	3	12	27.8399	47.817	17.12	19.1329	1.10347	998.582	1006.99	0.19822	4189.58	27.2955	640.76	0.722422	1851.59	0	1679.92	1671.57	1.96459	0	1.52926
901	10812	37812	10.5033	3.00333	12.0033	27.8527	47.8378	17.1296	19.1433	1.10339	998.579	1006.99	0.19822	4189.57	27.3005	641.035	0.722356	1852.22	0	1680.6	1672.25	1.96538	0	1.52926
902	10824	37824	10.5067	3.00667	12.0067	27.8654	47.8586	17.1392	19.1536	1.10332	998.577	1006.99	0.19822	4189.56	27.3054	641.31	0.72229	1852.85	0	1681.28	1672.93	1.96618	0	1.52926
903	10836	37836	10.51	3.01	12.01	27.8782	47.8794	17.1487	19.164	1.10325	998.574	1007	0.19822	4189.56	27.3103	641.584	0.722224	1853.47	0	1681.95	1673.61	1.96697	0	1.52926
904	10848	37848	10.5133	3.01333	12.0133	27.8909	47.9002	17.1583	19.1744	1.10318	998.572	1007	0.19822	4189.55	27.3152	641.858	0.722159	1854.09	0	1682.63	1674.28	1.96776	0	1.52926
905	10860	37860	10.5167	3.01667	12.0167	27.9037	47.9209	17.1679	19.1848	1.10311	998.569	1007	0.19822	4189.54	27.3201	642.131	0.722093	1854.71	0	1683.3	1674.96	1.96855	0	1.52926
906	10872	37872	10.52	3.02	12.02	27.9164	47.9416	17.1774	19.1952	1.10304	998.567	1007	0.19822	4189.53	27.3251	642.404	0.722028	1855.33	0	1683.98	1675.63	1.96934	0	1.52926
907	10884	37884	10.5233	3.02333	12.0233	27.9291	47.9623	17.187	19.2056	1.10297	998.564	1007	0.19822	4189.52	27.33	642.676	0.721962	1855.95	0	1684.65	1676.3	1.97012	0	1.52926
908	10896	37896	10.5267	3.02667	12.0267	27.9418	47.983	17.1966	19.216	1.10289	998.562	1007	0.19822	4189.52	27.3349	642.947	0.721897	1856.57	0	1685.32	1676.97	1.97091	0	1.52926
909	10908	37908	10.53	3.03	12.03	27.9546	48.0036	17.2062	19.2264	1.10282	998.559	1007	0.19822	4189.51	27.3398	643.218	0.721832	1857.18	0	1685.99	1677.63	1.97169	0	1.52926
910	10920	37920	10.5333	3.03333	12.0333	27.9673	48.0242	17.2158	19.2368	1.10275	998.556	1007	0.19822	4189.5	27.3447	643.488	0.721766	1857.79	0	1686.65	1678.3	1.97247	0	1.52926
911	10932	37932	10.5367	3.03667	12.0367	27.98	48.0448	17.2254	19.2472	1.10268	998.554	1007	0.19822	4189.49	27.3496	643.758	0.721701	1858.4	0	1687.32	1678.96	1.97325	0	1.52926
912	10944	37944	10.54	3.04	12.04	27.9927	48.0654	17.235	19.2576	1.10261	998.551	1007	0.19822	4189.48	27.3545	644.027	0.721636	1859.01	0	1687.98	1679.63	1.97402	0	1.52926
913	10956	37956	10.5433	3.04333	12.0433	28.0053	48.0859	17.2446	19.268	1.10254	998.549	1007.01	0.19822	4189.48	27.3593	644.296	0.721571	1859.62	0	1688.65	1680.29	1.9748	0	1.52926
914	10968	37968	10.5467	3.04667	12.0467	28.018	48.1065	17.2542	19.2784	1.10247	998.546	1007.01	0.19822	4189.47	27.3642	644.564	0.721506	1860.23	0	1689.31	1680.95	1.97557	0	1.52926
915	10980	37980	10.55	3.05	12.05	28.0307	48.127	17.2638	19.2888	1.1024	998.544	1007.01	0.19822	4189.46	27.3691	644.831	0.721441	1860.83	0	1689.97	1681.61	1.97634	0	1.52926
916	10992	37992	10.5533	3.05333	12.0533	28.0434	48.1474	17.2734	19.2992	1.10233	998.541	1007.01	0.19822	4189.45	27.374	645.098	0.721377	1861.43	0	1690.62	1682.26	1.97711	0	1.52926
917	11004	38004	10.5567	3.05667	12.0567	28.056	48.1679	17.283	19.3096	1.10226	998.538	1007.01	0.19822	4189.44	27.3788	645.364	0.721312	1862.04	0	1691.28	1682.92	1.97788	0	1.52926
918	11016	38016	10.56	3.06	12.06	28.0687	48.1883	17.2927	19.32	1.10219	998.536	1007.01	0.19822	4189.43	27.3837	645.63	0.721247	1862.64	0	1691.93	1683.57	1.97864	0	1.52926
919	11028	38028	10.5633	3.06333	12.0633	28.0813	48.2087	17.3023	19.3304	1.10212	998.533	1007.01	0.19822	4189.43	27.3886	645.895	0.721183	1863.23	0	1692.59	1684.22	1.97941	0	1.52926
920	11040	38040	10.5667	3.06667	12.0667	28.094	48.229	17.3119	19.3408	1.10205	998.531	1007.01	0.19822	4189.42	27.3934	646.16	0.721118	1863.83	0	1693.24	1684.87	1.98017	0	1.52926
921	11052	38052	10.57	3.07	12.07	28.1066	48.2494	17.3215	19.3512	1.10198	998.528	1007.01	0.19822	4189.41	27.3983	646.424	0.721054	1864.43	0	1693.89	1685.52	1.98093	0	1.52926
922	11064	38064	10.5733	3.07333	12.0733	28.1192	48.2697	17.3312	19.3617	1.10191	998.525	1007.01	0.19822	4189.4	27.4031	646.687	0.72099	1865.02	0	1694.54	1686.17	1.98169	0	1.52926
923	11076	38076	10.5767	3.07667	12.0767	28.1318	48.29	17.3408	19.3721	1.10184	998.523	1007.02	0.19822	4189.39	27.408	646.95	0.720925	1865.61	0	1695.19	1686.82	1.98244	0	1.52926
924	11088	38088	10.58	3.08	12.08	28.1444	48.3103	17.3505	19.3825	1.10177	998.52	1007.02	0.19822	4189.39	27.4128	647.212	0.720861	1866.2	0	1695.83	1687.46	1.9832	0	1.52926
925	11100	38100	10.5833	3.08333	12.0833	28.157	48.3305	17.3601	19.3929	1.1017	998.518	1007.02	0.19822	4189.38	27.4177	647.474	0.720797	1866.79	0	1696.47	1688.1	1.98395	0	1.52926
926	11112	38112	10.5867	3.08667	12.0867	28.1696	48.3507	17.3698	19.4034	1.10163	998.515	1007.02	0.19822	4189.37	27.4225	647.735	0.720733	1867.38	0	1697.12	1688.75	1.9847	0	1.52926
927	11124	38124	10.59	3.09	12.09	28.1822	48.3709	17.3794	19.4138	1.10156	998.512	1007.02	0.19822	4189.36	27.4273	647.995	0.720669	1867.96	0	1697.76	1689.39	1.98545	0	1.52926
928	11136	38136	10.5933	3.09333	12.0933	28.1948	48.3911	17.3891	19.4242	1.10149	998.51	1007.02	0.19822	4189.35	27.4321	648.255	0.720605	1868.54	0	1698.4	1690.02	1.9862	0	1.52926
929	11148	38148	10.5967	3.09667	12.0967	28.2074	48.4112	17.3987	19.4347	1.10142	998.507	1007.02	0.19822	4189.35	27.437	648.515	0.720541	1869.13	0	1699.04	1690.66	1.98695	0	1.52926
930	11160	38160	10.6	3.1	12.1	28.22	48.4313	17.4084	19.4451	1.10136	998.505	1007.02	0.19822	4189.34	27.4418	648.774	0.720477	1869.71	0	1699.67	1691.3	1.98769	0	1.52926
931	11172	38172	10.6033	3.10333	12.1033	28.2325	48.4514	17.4181	19.4555	1.10129	998.502	1007.02	0.19822	4189.33	27.4466	649.032	0.720414	1870.29	0	1700.31	1691.93	1.98843	0	1.52926
932	11184	38184	10.6067	3.10667	12.1067	28.2451	48.4715	17.4277	19.466	1.10122	998.499	1007.02	0.19822	4189.32	27.4514	649.289	0.72035	1870.86	0	1700.94	1692.56	1.98917	0	1.52926
933	11196	38196	10.61	3.11	12.11	28.2576	48.4915	17.4374	19.4764	1.10115	998.497	1007.03	0.19822	4189.31	27.4562	649.546	0.720286	1871.44	0	1701.57	1693.19	1.98991	0	1.52926
934	11208	38208	10.6133	3.11333	12.1133	28.2702	48.5116	17.4471	19.4868	1.10108	998.494	1007.03	0.19822	4189.3	27.461	649.803	0.720223	1872.01	0	1702.2	1693.82	1.99065	0	1.52926
935	11220	38220	10.6167	3.11667	12.1167	28.2827	48.5315	17.4568	19.4973	1.10101	998.492	1007.03	0.19822	4189.3	27.4658	650.059	0.72016	1872.58	0	1702.83	1694.45	1.99139	0	1.52926
936	11232	38232	10.62	3.12	12.12	28.2952	48.5515	17.4665	19.5077	1.10094	998.489	1007.03	0.19822	4189.29	27.4706	650.314	0.720096	1873.15	0	1703.46	1695.08	1.99212	0	1.52926
937	11244	38244	10.6233	3.12333	12.1233	28.3077	48.5715	17.4761	19.5182	1.10088	998.486	1007.03	0.19822	4189.28	27.4754	650.569	0.720033	1873.72	0	1704.08	1695.7	1.99285	0	1.52926
938	11256	38256	10.6267	3.12667	12.1267	28.3203	48.5914	17.4858	19.5286	1.10081	998.484	1007.03	0.19822	4189.27	27.4802	650.823	0.71997	1874.29	0	1704.71	1696.32	1.99358	0	1.52926
939	11268	38268	10.63	3.13	12.13	28.3328	48.6113	17.4955	19.5391	1.10074	998.481	1007.03	0.19822	4189.26	27.4849	651.077	0.719906	1874.86	0	1705.33	1696.95	1.99431	0	1.52926
940	11280	38280	10.6333	3.13333	12.1333	28.3453	48.6311	17.5052	19.5495	1.10067	998.479	1007.03	0.19822	4189.26	27.4897	651.33	0.719843	1875.42	0	1705.95	1697.57	1.99503	0	1.52926
941	11292	38292	10.6367	3.13667	12.1367	28.3578	48.651	17.5149	19.56	1.1006	998.476	1007.03	0.19822	4189.25	27.4945	651.582	0.71978	1875.98	0	1706.57	1698.18	1.99576	0	1.52926
942	11304	38304	10.64	3.14	12.14	28.3702	48.6708	17.5246	19.5704	1.10054	998.473	1007.03	0.19822	4189.24	27.4993	651.834	0.719717	1876.54	0	1707.19	1698.8	1.99648	0	1.52926
943	11316	38316	10.6433	3.14333	12.1433	28.3827	48.6906	17.5344	19.5809	1.10047	998.471	1007.04	0.19822	4189.23	27.504	652.085	0.719655	1877.1	0	1707.8	1699.42	1.9972	0	1.52926
944	11328	38328	10.6467	3.14667	12.1467	28.3952	48.7103	17.5441	19.5913	1.1004	998.468	1007.04	0.19822	4189.22	27.5088	652.336	0.719592	1877.66	0	1708.42	1700.03	1.99792	0	1.52926
945	11340	38340	10.65	3.15	12.15	28.4076	48.7301	17.5538	19.6018	1.10033	998.465	1007.04	0.19822	4189.22	27.5135	652.586	0.719529	1878.22	0	1709.03	1700.64	1.99864	0	1.52926
946	11352	38352	10.6533	3.15333	12.1533	28.4201	48.7498	17.5635	19.6123	1.10026	998.463	1007.04	0.19822	4189.21	27.5183	652.835	0.719466	1878.77	0	1709.64	1701.25	1.99935	0	1.52926
947	11364	38364	10.6567	3.15667	12.1567	28.4326	48.7694	17.5732	19.6227	1.1002	998.46	1007.04	0.19822	4189.2	27.523	653.084	0.719404	1879.32	0	1710.25	1701.86	2.00007	0	1.52926
948	11376	38376	10.66	3.16	12.16	28.445	48.7891	17.583	19.6332	1.10013	998.458	1007.04	0.19822	4189.19	27.5278	653.333	0.719341	1879.88	0	1710.86	1702.47	2.00078	0	1.52926
949	11388	38388	10.6633	3.16333	12.1633	28.4574	48.8087	17.5927	19.6437	1.10006	998.455	1007.04	0.19822	4189.18	27.5325	653.58	0.719279	1880.43	0	1711.47	1703.08	2.00149	0	1.52926
950	11400	38400	10.6667	3.16667	12.1667	28.4699	48.8283	17.6024	19.6541	1.1	998.452	1007.04	0.19822	4189.18	27.5372	653.827	0.719216	1880.97	0	1712.08	1703.68	2.0022	0	1.52926
951	11412	38412	10.67	3.17	12.17	28.4823	48.8479	17.6122	19.6646	1.09993	998.45	1007.04	0.19822	4189.17	27.542	654.074	0.719154	1881.52	0	1712.68	1704.29	2.0029	0	1.52926
952	11424	38424	10.6733	3.17333	12.1733	28.4947	48.8675	17.6219	19.6751	1.09986	998.447	1007.04	0.19822	4189.16	27.5467	654.32	0.719092	1882.06	0	1713.28	1704.89	2.00361	0	1.52926
953	11436	38436	10.6767	3.17667	12.1767	28.5071	48.887	17.6317	19.6855	1.0998	998.444	1007.04	0.19822	4189.15	27.5514	654.565	0.719029	1882.61	0	1713.88	1705.49	2.00431	0	1.52926
954	11448	38448	10.68	3.18	12.18	28.5195	48.9065	17.6414	19.696	1.09973	998.442	1007.05	0.19822	4189.14	27.5561	654.81	0.718967	1883.15	0	1714.48	1706.09	2.00501	0	1.52926
955	11460	38460	10.6833	3.18333	12.1833	28.5319	48.926	17.6512	19.7065	1.09966	998.439	1007.05	0.19822	4189.13	27.5609	655.055	0.718905	1883.69	0	1715.08	1706.68	2.00571	0	1.52926
956	11472	38472	10.6867	3.18667	12.1867	28.5443	48.9455	17.6609	19.717	1.0996	998.437	1007.05	0.19822	4189.13	27.5656	655.298	0.718843	1884.23	0	1715.68	1707.28	2.00641	0	1.52926
957	11484	38484	10.69	3.19	12.19	28.5566	48.9649	17.6707	19.7274	1.09953	998.434	1007.05	0.19822	4189.12	27.5703	655.541	0.718781	1884.76	0	1716.27	1707.87	2.0071	0	1.52926
958	11496	38496	10.6933	3.19333	12.1933	28.569	48.9843	17.6804	19.7379	1.09946	998.431	1007.05	0.19822	4189.11	27.575	655.784	0.718719	1885.3	0	1716.86	1708.46	2.0078	0	1.52926
959	11508	38508	10.6967	3.19667	12.1967	28.5814	49.0037	17.6902	19.7484	1.0994	998.429	1007.05	0.19822	4189.1	27.5797	656.026	0.718657	1885.83	0	1717.45	1709.05	2.00849	0	1.52926
960	11520	38520	10.7	3.2	12.2	28.5937	49.023	17.7	19.7589	1.09933	998.426	1007.05	0.19822	4189.09	27.5844	656.267	0.718596	1886.36	0	1718.04	1709.64	2.00918	0	1.52926
961	11532	38532	10.7033	3.20333	12.2033	28.6061	49.0423	17.7097	19.7694	1.09926	998.423	1007.05	0.19822	4189.09	27.5891	656.508	0.718534	1886.89	0	1718.63	1710.23	2.00986	0	1.52926
962	11544	38544	10.7067	3.20667	12.2067	28.6184	49.0616	17.7195	19.7798	1.0992	998.421	1007.05	0.19822	4189.08	27.5937	656.748	0.718472	1887.42	0	1719.22	1710.82	2.01055	0	1.52926
963	11556	38556	10.71	3.21	12.21	28.6308	49.0809	17.7293	19.7903	1.09913	998.418	1007.05	0.19822	4189.07	27.5984	656.987	0.718411	1887.95	0	1719.8	1711.4	2.01124	0	1.52926
964	11568	38568	10.7133	3.21333	12.2133	28.6431	49.1001	17.7391	19.8008	1.09907	998.415	1007.06	0.19822	4189.06	27.6031	657.226	0.718349	1888.47	0	1720.39	1711.98	2.01192	0	1.52926
965	11580	38580	10.7167	3.21667	12.2167	28.6554	49.1194	17.7489	19.8113	1.099	998.413	1007.06	0.19822	4189.05	27.6078	657.465	0.718288	1889	0	1720.97	1712.57	2.0126	0	1.52926
966	11592	38592	10.72	3.22	12.22	28.6677	49.1386	17.7586	19.8218	1.09894	998.41	1007.06	0.19822	4189.05	27.6124	657.703	0.718226	1889.52	0	1721.55	1713.15	2.01328	0	1.52926
967	11604	38604	10.7233	3.22333	12.2233	28.68	49.1577	17.7684	19.8323	1.09887	998.407	1007.06	0.19822	4189.04	27.6171	657.94	0.718165	1890.04	0	1722.13	1713.72	2.01395	0	1.52926
968	11616	38616	10.7267	3.22667	12.2267	28.6923	49.1769	17.7782	19.8428	1.0988	998.405	1007.06	0.19822	4189.03	27.6218	658.176	0.718104	1890.56	0	1722.71	1714.3	2.01463	0	1.52926
969	11628	38628	10.73	3.23	12.23	28.7046	49.196	17.788	19.8533	1.09874	998.402	1007.06	0.19822	4189.02	27.6264	658.412	0.718043	1891.07	0	1723.28	1714.88	2.0153	0	1.52926
970	11640	38640	10.7333	3.23333	12.2333	28.7169	49.2151	17.7978	19.8638	1.09867	998.4	1007.06	0.19822	4189.01	27.6311	658.648	0.717981	1891.59	0	1723.86	1715.45	2.01597	0	1.52926
971	11652	38652	10.7367	3.23667	12.2367	28.7292	49.2341	17.8076	19.8743	1.09861	998.397	1007.06	0.19822	4189	27.6357	658.883	0.71792	1892.1	0	1724.43	1716.02	2.01664	0	1.52926
972	11664	38664	10.74	3.24	12.24	28.7414	49.2532	17.8174	19.8848	1.09854	998.394	1007.06	0.19822	4189	27.6403	659.117	0.717859	1892.61	0	1725	1716.59	2.01731	0	1.52926
973	11676	38676	10.7433	3.24333	12.2433	28.7537	49.2722	17.8272	19.8953	1.09848	998.392	1007.06	0.19822	4188.99	27.645	659.351	0.717798	1893.12	0	1725.57	1717.16	2.01798	0	1.52926
974	11688	38688	10.7467	3.24667	12.2467	28.7659	49.2912	17.8371	19.9058	1.09841	998.389	1007.06	0.19822	4188.98	27.6496	659.584	0.717737	1893.63	0	1726.14	1717.73	2.01864	0	1.52926
975	11700	38700	10.75	3.25	12.25	28.7782	49.3101	17.8469	19.9163	1.09835	998.386	1007.07	0.19822	4188.97	27.6542	659.816	0.717677	1894.14	0	1726.7	1718.29	2.0193	0	1.52926
976	11712	38712	10.7533	3.25333	12.2533	28.7904	49.3291	17.8567	19.9268	1.09829	998.384	1007.07	0.19822	4188.96	27.6589	660.048	0.717616	1894.64	0	1727.27	1718.86	2.01996	0	1.52926
977	11724	38724	10.7567	3.25667	12.2567	28.8026	49.348	17.8665	19.9373	1.09822	998.381	1007.07	0.19822	4188.96	27.6635	660.28	0.717555	1895.15	0	1727.83	1719.42	2.02062	0	1.52926
978	11736	38736	10.76	3.26	12.26	28.8149	49.3668	17.8763	19.9478	1.09816	998.378	1007.07	0.19822	4188.95	27.6681	660.51	0.717495	1895.65	0	1728.39	1719.98	2.02128	0	1.52926
979	11748	38748	10.7633	3.26333	12.2633	28.8271	49.3857	17.8862	19.9583	1.09809	998.376	1007.07	0.19822	4188.94	27.6727	660.74	0.717434	1896.15	0	1728.95	1720.54	2.02193	0	1.52926
980	11760	38760	10.7667	3.26667	12.2667	28.8393	49.4045	17.896	19.9688	1.09803	998.373	1007.07	0.19822	4188.93	27.6773	660.97	0.717373	1896.65	0	1729.51	1721.1	2.02259	0	1.52926
981	11772	38772	10.77	3.27	12.27	28.8515	49.4233	17.9058	19.9793	1.09796	998.37	1007.07	0.19822	4188.92	27.6819	661.199	0.717313	1897.15	0	1730.07	1721.65	2.02324	0	1.52926
982	11784	38784	10.7733	3.27333	12.2733	28.8637	49.4421	17.9157	19.9898	1.0979	998.368	1007.07	0.19822	4188.92	27.6865	661.427	0.717253	1897.64	0	1730.62	1722.21	2.02389	0	1.52926
983	11796	38796	10.7767	3.27667	12.2767	28.8759	49.4609	17.9255	20.0003	1.09784	998.365	1007.07	0.19822	4188.91	27.6911	661.655	0.717192	1898.14	0	1731.18	1722.76	2.02453	0	1.52926
984	11808	38808	10.78	3.28	12.28	28.888	49.4796	17.9354	20.0108	1.09777	998.362	1007.07	0.19822	4188.9	27.6957	661.882	0.717132	1898.63	0	1731.73	1723.31	2.02518	0	1.52926
985	11820	38820	10.7833	3.28333	12.2833	28.9002	49.4983	17.9452	20.0214	1.09771	998.359	1007.08	0.19822	4188.89	27.7003	662.109	0.717072	1899.12	0	1732.28	1723.86	2.02582	0	1.52926
986	11832	38832	10.7867	3.28667	12.2867	28.9124	49.5169	17.9551	20.0319	1.09764	998.357	1007.08	0.19822	4188.88	27.7049	662.335	0.717012	1899.61	0	1732.83	1724.41	2.02646	0	1.52926
987	11844	38844	10.79	3.29	12.29	28.9245	49.5356	17.9649	20.0424	1.09758	998.354	1007.08	0.19822	4188.88	27.7095	662.56	0.716951	1900.09	0	1733.37	1724.96	2.0271	0	1.52926
988	11856	38856	10.7933	3.29333	12.2933	28.9367	49.5542	17.9748	20.0529	1.09752	998.351	1007.08	0.19822	4188.87	27.714	662.785	0.716891	1900.58	0	1733.92	1725.5	2.02774	0	1.52926
989	11868	38868	10.7967	3.29667	12.2967	28.9488	49.5728	17.9846	20.0634	1.09745	998.349	1007.08	0.19822	4188.86	27.7186	663.009	0.716831	1901.06	0	1734.46	1726.05	2.02838	0	1.52926
990	11880	38880	10.8	3.3	12.3	28.961	49.5913	17.9945	20.0739	1.09739	998.346	1007.08	0.19822	4188.85	27.7232	663.233	0.716772	1901.55	0	1735.01	1726.59	2.02901	0	1.52926
991	11892	38892	10.8033	3.30333	12.3033	28.9731	49.6099	18.0044	20.0845	1.09733	998.343	1007.08	0.19822	4188.84	27.7277	663.456	0.716712	1902.03	0	1735.55	1727.13	2.02965	0	1.52926
992	11904	38904	10.8067	3.30667	12.3067	28.9852	49.6284	18.0142	20.095	1.09726	998.341	1007.08	0.19822	4188.84	27.7323	663.678	0.716652	1902.51	0	1736.09	1727.67	2.03028	0	1.52926
993	11916	38916	10.81	3.31	12.31	28.9973	49.6469	18.0241	20.1055	1.0972	998.338	1007.08	0.19822	4188.83	27.7368	663.9	0.716592	1902.98	0	1736.62	1728.2	2.0309	0	1.52926
994	11928	38928	10.8133	3.31333	12.3133	29.0094	49.6653	18.034	20.116	1.09714	998.335	1007.08	0.19822	4188.82	27.7414	664.122	0.716532	1903.46	0	1737.16	1728.74	2.03153	0	1.52926
995	11940	38940	10.8167	3.31667	12.3167	29.0215	49.6838	18.0439	20.1266	1.09708	998.333	1007.08	0.19822	4188.81	27.7459	664.342	0.716473	1903.93	0	1737.69	1729.27	2.03216	0	1.52926
996	11952	38952	10.82	3.32	12.32	29.0336	49.7022	18.0538	20.1371	1.09701	998.33	1007.09	0.19822	4188.8	27.7505	664.562	0.716413	1904.4	0	1738.23	1729.81	2.03278	0	1.52926
997	11964	38964	10.8233	3.32333	12.3233	29.0457	49.7205	18.0636	20.1476	1.09695	998.327	1007.09	0.19822	4188.79	27.755	664.782	0.716354	1904.88	0	1738.76	1730.34	2.0334	0	1.52926
998	11976	38976	10.8267	3.32667	12.3267	29.0577	49.7389	18.0735	20.1582	1.09689	998.325	1007.09	0.19822	4188.79	27.7595	665.001	0.716294	1905.34	0	1739.29	1730.87	2.03402	0	1.52926
999	11988	38988	10.83	3.33	12.33	29.0698	49.7572	18.0834	20.1687	1.09683	998.322	1007.09	0.19822	4188.78	27.7641	665.219	0.716235	1905.81	0	1739.82	1731.39	2.03464	0	1.52926
1000	12000	39000	10.8333	3.33333	12.3333	29.0818	49.7755	18.0933	20.1792	1.09676	998.319	1007.09	0.19822	4188.77	27.7686	665.437	0.716176	1906.28	0	1740.34	1731.92	2.03525	0	1.52926
1001	12012	39012	10.8367	3.33667	12.3367	29.0939	49.7938	18.1032	20.1897	1.0967	998.316	1007.09	0.19822	4188.76	27.7731	665.654	0.716116	1906.74	0	1740.87	1732.44	2.03587	0	1.52926
1002	12024	39024	10.84	3.34	12.34	29.1059	49.812	18.1131	20.2003	1.09664	998.314	1007.09	0.19822	4188.75	27.7776	665.87	0.716057	1907.2	0	1741.39	1732.97	2.03648	0	1.52926
1003	12036	39036	10.8433	3.34333	12.3433	29.118	49.8302	18.123	20.2108	1.09658	998.311	1007.09	0.19822	4188.75	27.7821	666.086	0.715998	1907.66	0	1741.91	1733.49	2.03709	0	1.52926
1004	12048	39048	10.8467	3.34667	12.3467	29.13	49.8484	18.1329	20.2213	1.09652	998.308	1007.09	0.19822	4188.74	27.7866	666.301	0.715939	1908.12	0	1742.43	1734.01	2.0377	0	1.52926
1005	12060	39060	10.85	3.35	12.35	29.142	49.8666	18.1428	20.2319	1.09645	998.306	1007.09	0.19822	4188.73	27.7911	666.516	0.71588	1908.58	0	1742.95	1734.53	2.0383	0	1.52926
1006	12072	39072	10.8533	3.35333	12.3533	29.154	49.8847	18.1527	20.2424	1.09639	998.303	1007.09	0.19822	4188.72	27.7956	666.73	0.715821	1909.04	0	1743.47	1735.04	2.03891	0	1.52926
1007	12084	39084	10.8567	3.35667	12.3567	29.166	49.9028	18.1626	20.253	1.09633	998.3	1007.1	0.19822	4188.71	27.8001	666.944	0.715762	1909.49	0	1743.98	1735.56	2.03951	0	1.52926
1008	12096	39096	10.86	3.36	12.36	29.178	49.9209	18.1726	20.2635	1.09627	998.298	1007.1	0.19822	4188.71	27.8046	667.157	0.715703	1909.94	0	1744.5	1736.07	2.04011	0	1.52926
1009	12108	39108	10.8633	3.36333	12.3633	29.19	49.9389	18.1825	20.274	1.09621	998.295	1007.1	0.19822	4188.7	27.8091	667.369	0.715644	1910.39	0	1745.01	1736.58	2.04071	0	1.52926
1010	12120	39120	10.8667	3.36667	12.3667	29.202	49.957	18.1924	20.2846	1.09615	998.292	1007.1	0.19822	4188.69	27.8136	667.581	0.715585	1910.84	0	1745.52	1737.09	2.04131	0	1.52926
1011	12132	39132	10.87	3.37	12.37	29.2139	49.975	18.2023	20.2951	1.09609	998.289	1007.1	0.19822	4188.68	27.8181	667.792	0.715527	1911.29	0	1746.03	1737.6	2.0419	0	1.52926
1012	12144	39144	10.8733	3.37333	12.3733	29.2259	49.9929	18.2123	20.3057	1.09602	998.287	1007.1	0.19822	4188.67	27.8225	668.002	0.715468	1911.74	0	1746.53	1738.11	2.04249	0	1.52926
1013	12156	39156	10.8767	3.37667	12.3767	29.2379	50.0109	18.2222	20.3162	1.09596	998.284	1007.1	0.19822	4188.67	27.827	668.212	0.715409	1912.18	0	1747.04	1738.61	2.04308	0	1.52926
1014	12168	39168	10.88	3.38	12.38	29.2498	50.0288	18.2321	20.3268	1.0959	998.281	1007.1	0.19822	4188.66	27.8315	668.422	0.715351	1912.62	0	1747.54	1739.12	2.04367	0	1.52926
1015	12180	39180	10.8833	3.38333	12.3833	29.2617	50.0467	18.2421	20.3373	1.09584	998.279	1007.1	0.19822	4188.65	27.8359	668.63	0.715292	1913.06	0	1748.04	1739.62	2.04426	0	1.52926
1016	12192	39192	10.8867	3.38667	12.3867	29.2737	50.0646	18.252	20.3478	1.09578	998.276	1007.1	0.19822	4188.64	27.8404	668.839	0.715234	1913.5	0	1748.55	1740.12	2.04485	0	1.52926
1017	12204	39204	10.89	3.39	12.39	29.2856	50.0824	18.2619	20.3584	1.09572	998.273	1007.1	0.19822	4188.63	27.8448	669.046	0.715175	1913.94	0	1749.04	1740.62	2.04543	0	1.52926
1018	12216	39216	10.8933	3.39333	12.3933	29.2975	50.1002	18.2719	20.3689	1.09566	998.27	1007.11	0.19822	4188.63	27.8493	669.253	0.715117	1914.38	0	1749.54	1741.11	2.04601	0	1.52926
1019	12228	39228	10.8967	3.39667	12.3967	29.3094	50.118	18.2818	20.3795	1.0956	998.268	1007.11	0.19822	4188.62	27.8537	669.459	0.715059	1914.81	0	1750.04	1741.61	2.04659	0	1.52926
1020	12240	39240	10.9	3.4	12.4	29.3213	50.1357	18.2918	20.39	1.09554	998.265	1007.11	0.19822	4188.61	27.8581	669.665	0.715001	1915.24	0	1750.53	1742.1	2.04717	0	1.52926
1021	12252	39252	10.9033	3.40333	12.4033	29.3332	50.1535	18.3017	20.4006	1.09548	998.262	1007.11	0.19822	4188.6	27.8626	669.87	0.714942	1915.67	0	1751.02	1742.59	2.04774	0	1.52926
1022	12264	39264	10.9067	3.40667	12.4067	29.3451	50.1712	18.3117	20.4111	1.09542	998.26	1007.11	0.19822	4188.59	27.867	670.075	0.714884	1916.1	0	1751.51	1743.09	2.04832	0	1.52926
1023	12276	39276	10.91	3.41	12.41	29.357	50.1888	18.3217	20.4217	1.09536	998.257	1007.11	0.19822	4188.59	27.8714	670.279	0.714826	1916.53	0	1752	1743.57	2.04889	0	1.52926
1024	12288	39288	10.9133	3.41333	12.4133	29.3688	50.2065	18.3316	20.4322	1.0953	998.254	1007.11	0.19822	4188.58	27.8758	670.482	0.714768	1916.96	0	1752.49	1744.06	2.04946	0	1.52926
1025	12300	39300	10.9167	3.41667	12.4167	29.3807	50.2241	18.3416	20.4428	1.09524	998.251	1007.11	0.19822	4188.57	27.8803	670.685	0.71471	1917.38	0	1752.98	1744.55	2.05003	0	1.52926
1026	12312	39312	10.92	3.42	12.42	29.3925	50.2417	18.3516	20.4534	1.09518	998.249	1007.11	0.19822	4188.56	27.8847	670.887	0.714652	1917.8	0	1753.46	1745.03	2.0506	0	1.52926
1027	12324	39324	10.9233	3.42333	12.4233	29.4044	50.2593	18.3615	20.4639	1.09512	998.246	1007.11	0.19822	4188.55	27.8891	671.088	0.714595	1918.22	0	1753.94	1745.51	2.05116	0	1.52926
1028	12336	39336	10.9267	3.42667	12.4267	29.4162	50.2768	18.3715	20.4745	1.09506	998.243	1007.11	0.19822	4188.54	27.8935	671.289	0.714537	1918.64	0	1754.43	1746	2.05172	0	1.52926
1029	12348	39348	10.93	3.43	12.43	29.428	50.2943	18.3815	20.485	1.095	998.24	1007.11	0.19822	4188.54	27.8979	671.49	0.714479	1919.06	0	1754.9	1746.47	2.05228	0	1.52926
1030	12360	39360	10.9333	3.43333	12.4333	29.4399	50.3118	18.3915	20.4956	1.09494	998.238	1007.12	0.19822	4188.53	27.9023	671.689	0.714421	1919.48	0	1755.38	1746.95	2.05284	0	1.52926
1031	12372	39372	10.9367	3.43667	12.4367	29.4517	50.3292	18.4014	20.5061	1.09488	998.235	1007.12	0.19822	4188.52	27.9066	671.889	0.714364	1919.89	0	1755.86	1747.43	2.0534	0	1.52926
1032	12384	39384	10.94	3.44	12.44	29.4635	50.3467	18.4114	20.5167	1.09482	998.232	1007.12	0.19822	4188.51	27.911	672.087	0.714306	1920.3	0	1756.33	1747.9	2.05395	0	1.52926
1033	12396	39396	10.9433	3.44333	12.4433	29.4753	50.3641	18.4214	20.5273	1.09476	998.229	1007.12	0.19822	4188.5	27.9154	672.285	0.714249	1920.71	0	1756.81	1748.38	2.05451	0	1.52926
1034	12408	39408	10.9467	3.44667	12.4467	29.4871	50.3814	18.4314	20.5378	1.0947	998.227	1007.12	0.19822	4188.5	27.9198	672.482	0.714191	1921.12	0	1757.28	1748.85	2.05506	0	1.52926
1035	12420	39420	10.95	3.45	12.45	29.4988	50.3988	18.4414	20.5484	1.09465	998.224	1007.12	0.19822	4188.49	27.9241	672.679	0.714134	1921.53	0	1757.75	1749.32	2.05561	0	1.52926
1036	12432	39432	10.9533	3.45333	12.4533	29.5106	50.4161	18.4514	20.5589	1.09459	998.221	1007.12	0.19822	4188.48	27.9285	672.875	0.714076	1921.94	0	1758.22	1749.78	2.05615	0	1.52926
1037	12444	39444	10.9567	3.45667	12.4567	29.5224	50.4334	18.4614	20.5695	1.09453	998.219	1007.12	0.19822	4188.47	27.9329	673.071	0.714019	1922.34	0	1758.68	1750.25	2.0567	0	1.52926
1038	12456	39456	10.96	3.46	12.46	29.5341	50.4507	18.4714	20.5801	1.09447	998.216	1007.12	0.19822	4188.46	27.9372	673.266	0.713962	1922.74	0	1759.15	1750.71	2.05724	0	1.52926
1039	12468	39468	10.9633	3.46333	12.4633	29.5459	50.4679	18.4814	20.5906	1.09441	998.213	1007.12	0.19822	4188.46	27.9416	673.46	0.713904	1923.14	0	1759.61	1751.18	2.05778	0	1.52926
1040	12480	39480	10.9667	3.46667	12.4667	29.5576	50.4851	18.4914	20.6012	1.09435	998.21	1007.12	0.19822	4188.45	27.9459	673.654	0.713847	1923.54	0	1760.07	1751.64	2.05832	0	1.52926
1041	12492	39492	10.97	3.47	12.47	29.5693	50.5023	18.5014	20.6118	1.09429	998.208	1007.13	0.19822	4188.44	27.9503	673.847	0.71379	1923.94	0	1760.53	1752.1	2.05886	0	1.52926
1042	12504	39504	10.9733	3.47333	12.4733	29.5811	50.5194	18.5114	20.6223	1.09424	998.205	1007.13	0.19822	4188.43	27.9546	674.039	0.713733	1924.34	0	1760.99	1752.56	2.0594	0	1.52926
1043	12516	39516	10.9767	3.47667	12.4767	29.5928	50.5366	18.5214	20.6329	1.09418	998.202	1007.13	0.19822	4188.42	27.9589	674.231	0.713676	1924.73	0	1761.44	1753.01	2.05993	0	1.52926
1044	12528	39528	10.98	3.48	12.48	29.6045	50.5537	18.5314	20.6435	1.09412	998.199	1007.13	0.19822	4188.42	27.9633	674.422	0.713619	1925.12	0	1761.9	1753.47	2.06046	0	1.52926
1045	12540	39540	10.9833	3.48333	12.4833	29.6162	50.5707	18.5414	20.654	1.09406	998.197	1007.13	0.19822	4188.41	27.9676	674.613	0.713562	1925.51	0	1762.35	1753.92	2.06099	0	1.52926
1046	12552	39552	10.9867	3.48667	12.4867	29.6279	50.5878	18.5515	20.6646	1.094	998.194	1007.13	0.19822	4188.4	27.9719	674.803	0.713505	1925.9	0	1762.8	1754.37	2.06152	0	1.52926
1047	12564	39564	10.99	3.49	12.49	29.6396	50.6048	18.5615	20.6752	1.09395	998.191	1007.13	0.19822	4188.39	27.9762	674.993	0.713449	1926.29	0	1763.25	1754.82	2.06205	0	1.52926
1048	12576	39576	10.9933	3.49333	12.4933	29.6512	50.6218	18.5715	20.6857	1.09389	998.188	1007.13	0.19822	4188.38	27.9806	675.182	0.713392	1926.68	0	1763.7	1755.27	2.06257	0	1.52926
1049	12588	39588	10.9967	3.49667	12.4967	29.6629	50.6387	18.5815	20.6963	1.09383	998.185	1007.13	0.19822	4188.38	27.9849	675.37	0.713335	1927.06	0	1764.15	1755.72	2.06309	0	1.52926
1050	12600	39600	11	3.5	12.5	29.6745	50.6556	18.5916	20.7069	1.09377	998.183	1007.13	0.19822	4188.37	27.9892	675.557	0.713278	1927.44	0	1764.59	1756.16	2.06361	0	1.52926
1051	12612	39612	11.0033	3.50333	12.5033	29.6862	50.6725	18.6016	20.7174	1.09372	998.18	1007.13	0.19822	4188.36	27.9935	675.745	0.713222	1927.82	0	1765.04	1756.61	2.06413	0	1.52926
1052	12624	39624	11.0067	3.50667	12.5067	29.6978	50.6894	18.6116	20.728	1.09366	998.177	1007.13	0.19822	4188.35	27.9978	675.931	0.713165	1928.2	0	1765.48	1757.05	2.06465	0	1.52926
1053	12636	39636	11.01	3.51	12.51	29.7095	50.7063	18.6217	20.7386	1.0936	998.174	1007.14	0.19822	4188.34	28.002	676.117	0.713109	1928.58	0	1765.92	1757.49	2.06516	0	1.52926
1054	12648	39648	11.0133	3.51333	12.5133	29.7211	50.7231	18.6317	20.7491	1.09355	998.172	1007.14	0.19822	4188.34	28.0063	676.302	0.713052	1928.96	0	1766.36	1757.93	2.06568	0	1.52926
1055	12660	39660	11.0167	3.51667	12.5167	29.7327	50.7399	18.6417	20.7597	1.09349	998.169	1007.14	0.19822	4188.33	28.0106	676.487	0.712996	1929.33	0	1766.79	1758.36	2.06619	0	1.52926
1056	12672	39672	11.02	3.52	12.52	29.7443	50.7566	18.6518	20.7703	1.09343	998.166	1007.14	0.19822	4188.32	28.0149	676.671	0.71294	1929.7	0	1767.23	1758.8	2.0667	0	1.52926
1057	12684	39684	11.0233	3.52333	12.5233	29.7559	50.7734	18.6618	20.7809	1.09338	998.163	1007.14	0.19822	4188.31	28.0192	676.854	0.712883	1930.07	0	1767.66	1759.23	2.0672	0	1.52926
1058	12696	39696	11.0267	3.52667	12.5267	29.7675	50.7901	18.6719	20.7914	1.09332	998.161	1007.14	0.19822	4188.3	28.0234	677.037	0.712827	1930.44	0	1768.09	1759.66	2.06771	0	1.52926
1059	12708	39708	11.03	3.53	12.53	29.7791	50.8068	18.6819	20.802	1.09326	998.158	1007.14	0.19822	4188.3	28.0277	677.219	0.712771	1930.81	0	1768.52	1760.09	2.06821	0	1.52926
1060	12720	39720	11.0333	3.53333	12.5333	29.7907	50.8234	18.692	20.8126	1.09321	998.155	1007.14	0.19822	4188.29	28.0319	677.401	0.712715	1931.17	0	1768.95	1760.52	2.06871	0	1.52926
1061	12732	39732	11.0367	3.53667	12.5367	29.8022	50.84	18.7021	20.8232	1.09315	998.152	1007.14	0.19822	4188.28	28.0362	677.582	0.712659	1931.54	0	1769.38	1760.95	2.06921	0	1.52926
1062	12744	39744	11.04	3.54	12.54	29.8138	50.8566	18.7121	20.8337	1.09309	998.15	1007.14	0.19822	4188.27	28.0404	677.762	0.712602	1931.9	0	1769.81	1761.37	2.06971	0	1.52926
1063	12756	39756	11.0433	3.54333	12.5433	29.8253	50.8732	18.7222	20.8443	1.09304	998.147	1007.14	0.19822	4188.26	28.0447	677.942	0.712546	1932.26	0	1770.23	1761.8	2.0702	0	1.52926
1064	12768	39768	11.0467	3.54667	12.5467	29.8369	50.8897	18.7322	20.8549	1.09298	998.144	1007.14	0.19822	4188.26	28.0489	678.121	0.71249	1932.62	0	1770.65	1762.22	2.0707	0	1.52926
1065	12780	39780	11.05	3.55	12.55	29.8484	50.9062	18.7423	20.8655	1.09293	998.141	1007.15	0.19822	4188.25	28.0532	678.3	0.712435	1932.98	0	1771.07	1762.64	2.07119	0	1.52926
1066	12792	39792	11.0533	3.55333	12.5533	29.8599	50.9227	18.7524	20.876	1.09287	998.138	1007.15	0.19822	4188.24	28.0574	678.478	0.712379	1933.33	0	1771.49	1763.06	2.07168	0	1.52926
1067	12804	39804	11.0567	3.55667	12.5567	29.8714	50.9392	18.7624	20.8866	1.09281	998.136	1007.15	0.19822	4188.23	28.0616	678.655	0.712323	1933.69	0	1771.91	1763.48	2.07217	0	1.52926
1068	12816	39816	11.06	3.56	12.56	29.8829	50.9556	18.7725	20.8972	1.09276	998.133	1007.15	0.19822	4188.22	28.0659	678.832	0.712267	1934.04	0	1772.32	1763.89	2.07265	0	1.52926
1069	12828	39828	11.0633	3.56333	12.5633	29.8944	50.972	18.7826	20.9078	1.0927	998.13	1007.15	0.19822	4188.22	28.0701	679.008	0.712211	1934.39	0	1772.73	1764.31	2.07313	0	1.52926
1070	12840	39840	11.0667	3.56667	12.5667	29.9059	50.9884	18.7927	20.9184	1.09265	998.127	1007.15	0.19822	4188.21	28.0743	679.183	0.712156	1934.74	0	1773.15	1764.72	2.07362	0	1.52926
1071	12852	39852	11.07	3.57	12.57	29.9174	51.0047	18.8027	20.9289	1.09259	998.124	1007.15	0.19822	4188.2	28.0785	679.358	0.7121	1935.08	0	1773.56	1765.13	2.0741	0	1.52926
1072	12864	39864	11.0733	3.57333	12.5733	29.9289	51.021	18.8128	20.9395	1.09254	998.122	1007.15	0.19822	4188.19	28.0827	679.532	0.712044	1935.43	0	1773.96	1765.54	2.07457	0	1.52926
1073	12876	39876	11.0767	3.57667	12.5767	29.9404	51.0373	18.8229	20.9501	1.09248	998.119	1007.15	0.19822	4188.18	28.0869	679.706	0.711989	1935.77	0	1774.37	1765.94	2.07505	0	1.52926
1074	12888	39888	11.08	3.58	12.58	29.9518	51.0536	18.833	20.9607	1.09243	998.116	1007.15	0.19822	4188.18	28.0911	679.879	0.711933	1936.11	0	1774.78	1766.35	2.07552	0	1.52926
1075	12900	39900	11.0833	3.58333	12.5833	29.9633	51.0698	18.8431	20.9712	1.09237	998.113	1007.15	0.19822	4188.17	28.0953	680.052	0.711878	1936.45	0	1775.18	1766.75	2.07599	0	1.52926
1076	12912	39912	11.0867	3.58667	12.5867	29.9747	51.086	18.8532	20.9818	1.09232	998.111	1007.15	0.19822	4188.16	28.0995	680.224	0.711822	1936.79	0	1775.58	1767.15	2.07646	0	1.52926
1077	12924	39924	11.09	3.59	12.59	29.9861	51.1022	18.8633	20.9924	1.09226	998.108	1007.16	0.19822	4188.15	28.1036	680.395	0.711767	1937.13	0	1775.98	1767.56	2.07693	0	1.52926
1078	12936	39936	11.0933	3.59333	12.5933	29.9976	51.1183	18.8734	21.003	1.09221	998.105	1007.16	0.19822	4188.15	28.1078	680.565	0.711712	1937.47	0	1776.38	1767.95	2.0774	0	1.52926
1079	12948	39948	11.0967	3.59667	12.5967	30.009	51.1344	18.8835	21.0136	1.09215	998.102	1007.16	0.19822	4188.14	28.112	680.735	0.711657	1937.8	0	1776.78	1768.35	2.07786	0	1.52926
1080	12960	39960	11.1	3.6	12.6	30.0204	51.1505	18.8936	21.0241	1.0921	998.099	1007.16	0.19822	4188.13	28.1162	680.905	0.711601	1938.13	0	1777.17	1768.75	2.07832	0	1.52926
1081	12972	39972	11.1033	3.60333	12.6033	30.0318	51.1666	18.9037	21.0347	1.09205	998.097	1007.16	0.19822	4188.12	28.1203	681.074	0.711546	1938.46	0	1777.57	1769.14	2.07878	0	1.52926
1082	12984	39984	11.1067	3.60667	12.6067	30.0432	51.1826	18.9138	21.0453	1.09199	998.094	1007.16	0.19822	4188.11	28.1245	681.242	0.711491	1938.79	0	1777.96	1769.53	2.07924	0	1.52926
1083	12996	39996	11.11	3.61	12.61	30.0545	51.1986	18.9239	21.0559	1.09194	998.091	1007.16	0.19822	4188.11	28.1286	681.409	0.711436	1939.12	0	1778.35	1769.92	2.0797	0	1.52926
1084	13008	40008	11.1133	3.61333	12.6133	30.0659	51.2146	18.934	21.0665	1.09188	998.088	1007.16	0.19822	4188.1	28.1328	681.576	0.711381	1939.44	0	1778.74	1770.31	2.08015	0	1.52926
1085	13020	40020	11.1167	3.61667	12.6167	30.0773	51.2305	18.9441	21.0771	1.09183	998.085	1007.16	0.19822	4188.09	28.1369	681.743	0.711326	1939.76	0	1779.12	1770.7	2.08061	0	1.52926
1086	13032	40032	11.12	3.62	12.62	30.0886	51.2464	18.9542	21.0876	1.09178	998.083	1007.16	0.19822	4188.08	28.1411	681.908	0.711271	1940.09	0	1779.51	1771.08	2.08106	0	1.52926
1087	13044	40044	11.1233	3.62333	12.6233	30.1	51.2623	18.9643	21.0982	1.09172	998.08	1007.16	0.19822	4188.07	28.1452	682.074	0.711216	1940.41	0	1779.89	1771.47	2.0815	0	1.52926
1088	13056	40056	11.1267	3.62667	12.6267	30.1113	51.2782	18.9744	21.1088	1.09167	998.077	1007.16	0.19822	4188.07	28.1493	682.238	0.711161	1940.72	0	1780.27	1771.85	2.08195	0	1.52926
1089	13068	40068	11.13	3.63	12.63	30.1226	51.294	18.9846	21.1194	1.09162	998.074	1007.17	0.19822	4188.06	28.1535	682.402	0.711106	1941.04	0	1780.65	1772.23	2.0824	0	1.52926
1090	13080	40080	11.1333	3.63333	12.6333	30.134	51.3098	18.9947	21.13	1.09156	998.071	1007.17	0.19822	4188.05	28.1576	682.565	0.711052	1941.36	0	1781.03	1772.61	2.08284	0	1.52926
1091	13092	40092	11.1367	3.63667	12.6367	30.1453	51.3256	19.0048	21.1405	1.09151	998.069	1007.17	0.19822	4188.04	28.1617	682.728	0.710997	1941.67	0	1781.41	1772.99	2.08328	0	1.52926
1092	13104	40104	11.14	3.64	12.64	30.1566	51.3413	19.0149	21.1511	1.09146	998.066	1007.17	0.19822	4188.03	28.1658	682.89	0.710942	1941.98	0	1781.78	1773.36	2.08372	0	1.52926
1093	13116	40116	11.1433	3.64333	12.6433	30.1679	51.357	19.0251	21.1617	1.0914	998.063	1007.17	0.19822	4188.03	28.1699	683.051	0.710888	1942.29	0	1782.16	1773.74	2.08415	0	1.52926
1094	13128	40128	11.1467	3.64667	12.6467	30.1792	51.3727	19.0352	21.1723	1.09135	998.06	1007.17	0.19822	4188.02	28.174	683.212	0.710833	1942.6	0	1782.53	1774.11	2.08459	0	1.52926
1095	13140	40140	11.15	3.65	12.65	30.1904	51.3884	19.0453	21.1829	1.0913	998.057	1007.17	0.19822	4188.01	28.1781	683.373	0.710778	1942.91	0	1782.9	1774.48	2.08502	0	1.52926
1096	13152	40152	11.1533	3.65333	12.6533	30.2017	51.404	19.0555	21.1935	1.09124	998.055	1007.17	0.19822	4188	28.1822	683.532	0.710724	1943.21	0	1783.27	1774.85	2.08545	0	1.52926
1097	13164	40164	11.1567	3.65667	12.6567	30.213	51.4196	19.0656	21.204	1.09119	998.052	1007.17	0.19822	4187.99	28.1863	683.691	0.710669	1943.51	0	1783.63	1775.21	2.08588	0	1.52926
1098	13176	40176	11.16	3.66	12.66	30.2242	51.4352	19.0757	21.2146	1.09114	998.049	1007.17	0.19822	4187.99	28.1904	683.85	0.710615	1943.82	0	1784	1775.58	2.08631	0	1.52926
1099	13188	40188	11.1633	3.66333	12.6633	30.2355	51.4507	19.0859	21.2252	1.09109	998.046	1007.17	0.19822	4187.98	28.1945	684.007	0.710561	1944.11	0	1784.36	1775.94	2.08673	0	1.52926
1100	13200	40200	11.1667	3.66667	12.6667	30.2467	51.4662	19.096	21.2358	1.09103	998.043	1007.17	0.19822	4187.97	28.1986	684.164	0.710506	1944.41	0	1784.72	1776.3	2.08715	0	1.52926
1101	13212	40212	11.17	3.67	12.67	30.2579	51.4817	19.1062	21.2464	1.09098	998.04	1007.17	0.19822	4187.96	28.2026	684.321	0.710452	1944.71	0	1785.08	1776.66	2.08757	0	1.52926
1102	13224	40224	11.1733	3.67333	12.6733	30.2691	51.4972	19.1163	21.2569	1.09093	998.038	1007.18	0.19822	4187.95	28.2067	684.477	0.710398	1945	0	1785.44	1777.02	2.08799	0	1.52926
1103	13236	40236	11.1767	3.67667	12.6767	30.2803	51.5126	19.1265	21.2675	1.09088	998.035	1007.18	0.19822	4187.95	28.2108	684.632	0.710344	1945.3	0	1785.8	1777.38	2.08841	0	1.52926
1104	13248	40248	11.18	3.68	12.68	30.2915	51.528	19.1366	21.2781	1.09083	998.032	1007.18	0.19822	4187.94	28.2148	684.787	0.710289	1945.59	0	1786.15	1777.74	2.08883	0	1.52926
1105	13260	40260	11.1833	3.68333	12.6833	30.3027	51.5434	19.1468	21.2887	1.09077	998.029	1007.18	0.19822	4187.93	28.2189	684.941	0.710235	1945.88	0	1786.51	1778.09	2.08924	0	1.52926
1106	13272	40272	11.1867	3.68667	12.6867	30.3139	51.5587	19.1569	21.2993	1.09072	998.026	1007.18	0.19822	4187.92	28.2229	685.095	0.710181	1946.17	0	1786.86	1778.44	2.08965	0	1.52926
1107	13284	40284	11.19	3.69	12.69	30.3251	51.574	19.1671	21.3099	1.09067	998.023	1007.18	0.19822	4187.92	28.227	685.247	0.710127	1946.45	0	1787.21	1778.79	2.09006	0	1.52926
1108	13296	40296	11.1933	3.69333	12.6933	30.3362	51.5893	19.1772	21.3204	1.09062	998.021	1007.18	0.19822	4187.91	28.231	685.4	0.710073	1946.74	0	1787.55	1779.14	2.09047	0	1.52926
1109	13308	40308	11.1967	3.69667	12.6967	30.3474	51.6046	19.1874	21.331	1.09057	998.018	1007.18	0.19822	4187.9	28.235	685.551	0.710019	1947.02	0	1787.9	1779.49	2.09087	0	1.52926
1110	13320	40320	11.2	3.7	12.7	30.3585	51.6198	19.1975	21.3416	1.09052	998.015	1007.18	0.19822	4187.89	28.2391	685.702	0.709965	1947.3	0	1788.25	1779.83	2.09127	0	1.52926
1111	13332	40332	11.2033	3.70333	12.7033	30.3697	51.635	19.2077	21.3522	1.09047	998.012	1007.18	0.19822	4187.88	28.2431	685.853	0.709911	1947.58	0	1788.59	1780.18	2.09167	0	1.52926
1112	13344	40344	11.2067	3.70667	12.7067	30.3808	51.6502	19.2179	21.3628	1.09041	998.009	1007.18	0.19822	4187.88	28.2471	686.002	0.709858	1947.86	0	1788.93	1780.52	2.09207	0	1.52926
1113	13356	40356	11.21	3.71	12.71	30.3919	51.6653	19.228	21.3733	1.09036	998.007	1007.18	0.19822	4187.87	28.2511	686.152	0.709804	1948.13	0	1789.27	1780.86	2.09247	0	1.52926
1114	13368	40368	11.2133	3.71333	12.7133	30.403	51.6804	19.2382	21.3839	1.09031	998.004	1007.19	0.19822	4187.86	28.2551	686.3	0.70975	1948.41	0	1789.61	1781.2	2.09287	0	1.52926
1115	13380	40380	11.2167	3.71667	12.7167	30.4141	51.6955	19.2484	21.3945	1.09026	998.001	1007.19	0.19822	4187.85	28.2591	686.448	0.709696	1948.68	0	1789.94	1781.53	2.09326	0	1.52926
1116	13392	40392	11.22	3.72	12.72	30.4252	51.7106	19.2586	21.4051	1.09021	997.998	1007.19	0.19822	4187.84	28.2631	686.595	0.709643	1948.95	0	1790.28	1781.87	2.09365	0	1.52926
1117	13404	40404	11.2233	3.72333	12.7233	30.4363	51.7256	19.2687	21.4157	1.09016	997.995	1007.19	0.19822	4187.84	28.2671	686.742	0.709589	1949.22	0	1790.61	1782.2	2.09404	0	1.52926
1118	13416	40416	11.2267	3.72667	12.7267	30.4474	51.7406	19.2789	21.4263	1.09011	997.992	1007.19	0.19822	4187.83	28.2711	686.888	0.709536	1949.49	0	1790.94	1782.53	2.09443	0	1.52926
1119	13428	40428	11.23	3.73	12.73	30.4585	51.7556	19.2891	21.4368	1.09006	997.99	1007.19	0.19822	4187.82	28.2751	687.034	0.709482	1949.75	0	1791.27	1782.86	2.09481	0	1.52926
1120	13440	40440	11.2333	3.73333	12.7333	30.4695	51.7705	19.2993	21.4474	1.09001	997.987	1007.19	0.19822	4187.81	28.2791	687.178	0.709429	1950.02	0	1791.6	1783.19	2.09519	0	1.52926
1121	13452	40452	11.2367	3.73667	12.7367	30.4806	51.7854	19.3095	21.458	1.08996	997.984	1007.19	0.19822	4187.8	28.2831	687.323	0.709375	1950.28	0	1791.92	1783.52	2.09558	0	1.52926
1122	13464	40464	11.24	3.74	12.74	30.4916	51.8003	19.3196	21.4686	1.08991	997.981	1007.19	0.19822	4187.8	28.2871	687.466	0.709322	1950.54	0	1792.25	1783.84	2.09595	0	1.52926
1123	13476	40476	11.2433	3.74333	12.7433	30.5026	51.8151	19.3298	21.4792	1.08986	997.978	1007.19	0.19822	4187.79	28.291	687.609	0.709268	1950.8	0	1792.57	1784.17	2.09633	0	1.52926
1124	13488	40488	11.2467	3.74667	12.7467	30.5137	51.83	19.34	21.4897	1.08981	997.975	1007.19	0.19822	4187.78	28.295	687.752	0.709215	1951.06	0	1792.89	1784.49	2.09671	0	1.52926
1125	13500	40500	11.25	3.75	12.75	30.5247	51.8447	19.3502	21.5003	1.08976	997.972	1007.19	0.19822	4187.77	28.2989	687.893	0.709162	1951.31	0	1793.21	1784.81	2.09708	0	1.52926
1126	13512	40512	11.2533	3.75333	12.7533	30.5357	51.8595	19.3604	21.5109	1.08971	997.97	1007.19	0.19822	4187.77	28.3029	688.035	0.709108	1951.56	0	1793.53	1785.13	2.09745	0	1.52926
1127	13524	40524	11.2567	3.75667	12.7567	30.5467	51.8742	19.3706	21.5215	1.08966	997.967	1007.2	0.19822	4187.76	28.3069	688.175	0.709055	1951.82	0	1793.84	1785.44	2.09782	0	1.52926
1128	13536	40536	11.26	3.76	12.76	30.5577	51.8889	19.3808	21.532	1.08961	997.964	1007.2	0.19822	4187.75	28.3108	688.315	0.709002	1952.07	0	1794.16	1785.76	2.09819	0	1.52926
1129	13548	40548	11.2633	3.76333	12.7633	30.5686	51.9036	19.391	21.5426	1.08956	997.961	1007.2	0.19822	4187.74	28.3147	688.454	0.708949	1952.32	0	1794.47	1786.07	2.09855	0	1.52926
1130	13560	40560	11.2667	3.76667	12.7667	30.5796	51.9183	19.4012	21.5532	1.08951	997.958	1007.2	0.19822	4187.73	28.3187	688.593	0.708896	1952.56	0	1794.78	1786.38	2.09892	0	1.52926
1131	13572	40572	11.27	3.77	12.77	30.5906	51.9329	19.4114	21.5638	1.08946	997.955	1007.2	0.19822	4187.73	28.3226	688.731	0.708843	1952.81	0	1795.09	1786.69	2.09928	0	1.52926
1132	13584	40584	11.2733	3.77333	12.7733	30.6015	51.9475	19.4216	21.5744	1.08941	997.953	1007.2	0.19822	4187.72	28.3265	688.868	0.70879	1953.05	0	1795.4	1787	2.09964	0	1.52926
1133	13596	40596	11.2767	3.77667	12.7767	30.6125	51.962	19.4318	21.5849	1.08936	997.95	1007.2	0.19822	4187.71	28.3305	689.005	0.708737	1953.29	0	1795.7	1787.31	2.09999	0	1.52926
1134	13608	40608	11.28	3.78	12.78	30.6234	51.9766	19.442	21.5955	1.08931	997.947	1007.2	0.19822	4187.7	28.3344	689.141	0.708684	1953.53	0	1796.01	1787.61	2.10035	0	1.52926
1135	13620	40620	11.2833	3.78333	12.7833	30.6343	51.9911	19.4522	21.6061	1.08927	997.944	1007.2	0.19822	4187.7	28.3383	689.277	0.708631	1953.77	0	1796.31	1787.91	2.1007	0	1.52926
1136	13632	40632	11.2867	3.78667	12.7867	30.6452	52.0055	19.4624	21.6167	1.08922	997.941	1007.2	0.19822	4187.69	28.3422	689.412	0.708578	1954.01	0	1796.61	1788.21	2.10105	0	1.52926
1137	13644	40644	11.29	3.79	12.79	30.6561	52.02	19.4726	21.6272	1.08917	997.938	1007.2	0.19822	4187.68	28.3461	689.546	0.708525	1954.24	0	1796.91	1788.51	2.1014	0	1.52926
1138	13656	40656	11.2933	3.79333	12.7933	30.667	52.0344	19.4828	21.6378	1.08912	997.935	1007.2	0.19822	4187.67	28.35	689.68	0.708473	1954.48	0	1797.2	1788.81	2.10175	0	1.52926
1139	13668	40668	11.2967	3.79667	12.7967	30.6779	52.0488	19.493	21.6484	1.08907	997.933	1007.2	0.19822	4187.66	28.3539	689.813	0.70842	1954.71	0	1797.5	1789.11	2.1021	0	1.52926
1140	13680	40680	11.3	3.8	12.8	30.6888	52.0631	19.5032	21.659	1.08902	997.93	1007.2	0.19822	4187.66	28.3578	689.945	0.708367	1954.94	0	1797.79	1789.4	2.10244	0	1.52926
1141	13692	40692	11.3033	3.80333	12.8033	30.6997	52.0774	19.5135	21.6695	1.08898	997.927	1007.21	0.19822	4187.65	28.3617	690.077	0.708314	1955.17	0	1798.08	1789.69	2.10278	0	1.52926
1142	13704	40704	11.3067	3.80667	12.8067	30.7105	52.0917	19.5237	21.6801	1.08893	997.924	1007.21	0.19822	4187.64	28.3655	690.209	0.708262	1955.39	0	1798.38	1789.98	2.10312	0	1.52926
1143	13716	40716	11.31	3.81	12.81	30.7214	52.106	19.5339	21.6907	1.08888	997.921	1007.21	0.19822	4187.63	28.3694	690.339	0.708209	1955.62	0	1798.66	1790.27	2.10346	0	1.52926
1144	13728	40728	11.3133	3.81333	12.8133	30.7322	52.1202	19.5441	21.7012	1.08883	997.918	1007.21	0.19822	4187.62	28.3733	690.469	0.708157	1955.84	0	1798.95	1790.56	2.10379	0	1.52926
1145	13740	40740	11.3167	3.81667	12.8167	30.7431	52.1344	19.5543	21.7118	1.08878	997.915	1007.21	0.19822	4187.62	28.3772	690.599	0.708104	1956.06	0	1799.24	1790.85	2.10413	0	1.52926
1146	13752	40752	11.32	3.82	12.82	30.7539	52.1486	19.5646	21.7224	1.08874	997.913	1007.21	0.19822	4187.61	28.381	690.727	0.708052	1956.28	0	1799.52	1791.13	2.10446	0	1.52926
1147	13764	40764	11.3233	3.82333	12.8233	30.7647	52.1628	19.5748	21.733	1.08869	997.91	1007.21	0.19822	4187.6	28.3849	690.855	0.707999	1956.5	0	1799.8	1791.41	2.10479	0	1.52926
1148	13776	40776	11.3267	3.82667	12.8267	30.7755	52.1769	19.585	21.7435	1.08864	997.907	1007.21	0.19822	4187.59	28.3887	690.983	0.707947	1956.72	0	1800.08	1791.69	2.10511	0	1.52926
1149	13788	40788	11.33	3.83	12.83	30.7863	52.191	19.5953	21.7541	1.08859	997.904	1007.21	0.19822	4187.59	28.3926	691.11	0.707895	1956.93	0	1800.36	1791.97	2.10544	0	1.52926
1150	13800	40800	11.3333	3.83333	12.8333	30.7971	52.205	19.6055	21.7647	1.08855	997.901	1007.21	0.19822	4187.58	28.3964	691.236	0.707842	1957.14	0	1800.63	1792.25	2.10576	0	1.52926
1151	13812	40812	11.3367	3.83667	12.8367	30.8079	52.219	19.6157	21.7752	1.0885	997.898	1007.21	0.19822	4187.57	28.4002	691.362	0.70779	1957.36	0	1800.91	1792.53	2.10608	0	1.52926
1152	13824	40824	11.34	3.84	12.84	30.8186	52.233	19.626	21.7858	1.08845	997.895	1007.21	0.19822	4187.56	28.4041	691.487	0.707738	1957.56	0	1801.18	1792.8	2.1064	0	1.52926
1153	13836	40836	11.3433	3.84333	12.8433	30.8294	52.247	19.6362	21.7964	1.08841	997.892	1007.21	0.19822	4187.55	28.4079	691.611	0.707685	1957.77	0	1801.45	1793.07	2.10672	0	1.52926
1154	13848	40848	11.3467	3.84667	12.8467	30.8401	52.2609	19.6464	21.8069	1.08836	997.89	1007.22	0.19822	4187.55	28.4117	691.735	0.707633	1957.98	0	1801.72	1793.34	2.10703	0	1.52926
1155	13860	40860	11.35	3.85	12.85	30.8509	52.2749	19.6567	21.8175	1.08831	997.887	1007.22	0.19822	4187.54	28.4155	691.858	0.707581	1958.18	0	1801.99	1793.61	2.10735	0	1.52926
1156	13872	40872	11.3533	3.85333	12.8533	30.8616	52.2887	19.6669	21.8281	1.08827	997.884	1007.22	0.19822	4187.53	28.4194	691.981	0.707529	1958.39	0	1802.26	1793.88	2.10766	0	1.52926
1157	13884	40884	11.3567	3.85667	12.8567	30.8723	52.3026	19.6771	21.8386	1.08822	997.881	1007.22	0.19822	4187.52	28.4232	692.102	0.707477	1958.59	0	1802.52	1794.14	2.10797	0	1.52926
1158	13896	40896	11.36	3.86	12.86	30.8831	52.3164	19.6874	21.8492	1.08817	997.878	1007.22	0.19822	4187.52	28.427	692.224	0.707425	1958.79	0	1802.78	1794.41	2.10827	0	1.52926
1159	13908	40908	11.3633	3.86333	12.8633	30.8938	52.3302	19.6976	21.8598	1.08813	997.875	1007.22	0.19822	4187.51	28.4308	692.344	0.707373	1958.98	0	1803.04	1794.67	2.10858	0	1.52926
1160	13920	40920	11.3667	3.86667	12.8667	30.9045	52.344	19.7079	21.8703	1.08808	997.872	1007.22	0.19822	4187.5	28.4346	692.464	0.707321	1959.18	0	1803.3	1794.93	2.10888	0	1.52926
1161	13932	40932	11.37	3.87	12.87	30.9151	52.3577	19.7181	21.8809	1.08803	997.869	1007.22	0.19822	4187.49	28.4384	692.584	0.707269	1959.37	0	1803.56	1795.19	2.10918	0	1.52926
1162	13944	40944	11.3733	3.87333	12.8733	30.9258	52.3714	19.7284	21.8914	1.08799	997.867	1007.22	0.19822	4187.48	28.4421	692.703	0.707217	1959.56	0	1803.82	1795.44	2.10948	0	1.52926
1163	13956	40956	11.3767	3.87667	12.8767	30.9365	52.3851	19.7386	21.902	1.08794	997.864	1007.22	0.19822	4187.48	28.4459	692.821	0.707165	1959.76	0	1804.07	1795.7	2.10978	0	1.52926
1164	13968	40968	11.38	3.88	12.88	30.9471	52.3987	19.7489	21.9126	1.0879	997.861	1007.22	0.19822	4187.47	28.4497	692.938	0.707113	1959.94	0	1804.32	1795.95	2.11007	0	1.52926
1165	13980	40980	11.3833	3.88333	12.8833	30.9578	52.4123	19.7591	21.9231	1.08785	997.858	1007.22	0.19822	4187.46	28.4535	693.055	0.707062	1960.13	0	1804.57	1796.2	2.11037	0	1.52926
1166	13992	40992	11.3867	3.88667	12.8867	30.9684	52.4259	19.7694	21.9337	1.0878	997.855	1007.22	0.19822	4187.45	28.4572	693.172	0.70701	1960.32	0	1804.82	1796.45	2.11066	0	1.52926
1167	14004	41004	11.39	3.89	12.89	30.9791	52.4395	19.7796	21.9442	1.08776	997.852	1007.22	0.19822	4187.45	28.461	693.287	0.706958	1960.5	0	1805.07	1796.7	2.11095	0	1.52926
1168	14016	41016	11.3933	3.89333	12.8933	30.9897	52.453	19.7899	21.9548	1.08771	997.849	1007.23	0.19822	4187.44	28.4647	693.402	0.706907	1960.68	0	1805.31	1796.95	2.11123	0	1.52926
1169	14028	41028	11.3967	3.89667	12.8967	31.0003	52.4665	19.8001	21.9654	1.08767	997.846	1007.23	0.19822	4187.43	28.4685	693.517	0.706855	1960.86	0	1805.56	1797.19	2.11152	0	1.52926
1170	14040	41040	11.4	3.9	12.9	31.0109	52.4799	19.8104	21.9759	1.08762	997.843	1007.23	0.19822	4187.42	28.4722	693.631	0.706803	1961.04	0	1805.8	1797.44	2.1118	0	1.52926
1171	14052	41052	11.4033	3.90333	12.9033	31.0215	52.4934	19.8207	21.9865	1.08758	997.841	1007.23	0.19822	4187.41	28.476	693.744	0.706752	1961.22	0	1806.04	1797.68	2.11208	0	1.52926
1172	14064	41064	11.4067	3.90667	12.9067	31.0321	52.5068	19.8309	21.997	1.08753	997.838	1007.23	0.19822	4187.41	28.4797	693.856	0.7067	1961.39	0	1806.28	1797.92	2.11236	0	1.52926
1173	14076	41076	11.41	3.91	12.91	31.0427	52.5201	19.8412	22.0076	1.08749	997.835	1007.23	0.19822	4187.4	28.4835	693.968	0.706649	1961.57	0	1806.51	1798.16	2.11264	0	1.52926
1174	14088	41088	11.4133	3.91333	12.9133	31.0532	52.5335	19.8515	22.0181	1.08744	997.832	1007.23	0.19822	4187.39	28.4872	694.08	0.706597	1961.74	0	1806.75	1798.39	2.11291	0	1.52926
1175	14100	41100	11.4167	3.91667	12.9167	31.0638	52.5468	19.8617	22.0287	1.0874	997.829	1007.23	0.19822	4187.38	28.4909	694.19	0.706546	1961.91	0	1806.98	1798.63	2.11319	0	1.52926
1176	14112	41112	11.42	3.92	12.92	31.0743	52.5601	19.872	22.0392	1.08735	997.826	1007.23	0.19822	4187.38	28.4946	694.3	0.706494	1962.08	0	1807.21	1798.86	2.11346	0	1.52926
1177	14124	41124	11.4233	3.92333	12.9233	31.0849	52.5733	19.8823	22.0498	1.08731	997.823	1007.23	0.19822	4187.37	28.4983	694.41	0.706443	1962.24	0	1807.44	1799.09	2.11373	0	1.52926
1178	14136	41136	11.4267	3.92667	12.9267	31.0954	52.5866	19.8925	22.0603	1.08727	997.82	1007.23	0.19822	4187.36	28.502	694.519	0.706392	1962.41	0	1807.67	1799.32	2.11399	0	1.52926
1179	14148	41148	11.43	3.93	12.93	31.1059	52.5998	19.9028	22.0709	1.08722	997.817	1007.23	0.19822	4187.35	28.5057	694.627	0.70634	1962.57	0	1807.9	1799.55	2.11426	0	1.52926
1180	14160	41160	11.4333	3.93333	12.9333	31.1164	52.6129	19.9131	22.0814	1.08718	997.815	1007.23	0.19822	4187.35	28.5094	694.734	0.706289	1962.73	0	1808.12	1799.77	2.11452	0	1.52926
1181	14172	41172	11.4367	3.93667	12.9367	31.1269	52.6261	19.9233	22.092	1.08713	997.812	1007.23	0.19822	4187.34	28.5131	694.841	0.706238	1962.89	0	1808.35	1800	2.11478	0	1.52926
1182	14184	41184	11.44	3.94	12.94	31.1374	52.6392	19.9336	22.1025	1.08709	997.809	1007.23	0.19822	4187.33	28.5168	694.948	0.706187	1963.05	0	1808.57	1800.22	2.11504	0	1.52926
1183	14196	41196	11.4433	3.94333	12.9433	31.1479	52.6522	19.9439	22.1131	1.08705	997.806	1007.24	0.19822	4187.32	28.5205	695.053	0.706136	1963.21	0	1808.79	1800.44	2.1153	0	1.52926
1184	14208	41208	11.4467	3.94667	12.9467	31.1584	52.6653	19.9542	22.1236	1.087	997.803	1007.24	0.19822	4187.31	28.5242	695.158	0.706084	1963.36	0	1809	1800.66	2.11555	0	1.52926
1185	14220	41220	11.45	3.95	12.95	31.1688	52.6783	19.9644	22.1342	1.08696	997.8	1007.24	0.19822	4187.31	28.5279	695.263	0.706033	1963.52	0	1809.22	1800.87	2.1158	0	1.52926
1186	14232	41232	11.4533	3.95333	12.9533	31.1793	52.6913	19.9747	22.1447	1.08691	997.797	1007.24	0.19822	4187.3	28.5315	695.367	0.705982	1963.67	0	1809.43	1801.09	2.11605	0	1.52926
1187	14244	41244	11.4567	3.95667	12.9567	31.1897	52.7042	19.985	22.1552	1.08687	997.794	1007.24	0.19822	4187.29	28.5352	695.47	0.705931	1963.82	0	1809.65	1801.3	2.1163	0	1.52926
1188	14256	41256	11.46	3.96	12.96	31.2002	52.7172	19.9953	22.1658	1.08683	997.791	1007.24	0.19822	4187.28	28.5388	695.573	0.70588	1963.96	0	1809.86	1801.52	2.11655	0	1.52926
1189	14268	41268	11.4633	3.96333	12.9633	31.2106	52.7301	20.0056	22.1763	1.08678	997.788	1007.24	0.19822	4187.28	28.5425	695.674	0.705829	1964.11	0	1810.07	1801.73	2.11679	0	1.52926
1190	14280	41280	11.4667	3.96667	12.9667	31.221	52.7429	20.0159	22.1869	1.08674	997.786	1007.24	0.19822	4187.27	28.5462	695.776	0.705778	1964.25	0	1810.27	1801.93	2.11703	0	1.52926
1191	14292	41292	11.47	3.97	12.97	31.2314	52.7558	20.0261	22.1974	1.0867	997.783	1007.24	0.19822	4187.26	28.5498	695.876	0.705727	1964.4	0	1810.48	1802.14	2.11727	0	1.52926
1192	14304	41304	11.4733	3.97333	12.9733	31.2418	52.7686	20.0364	22.2079	1.08666	997.78	1007.24	0.19822	4187.25	28.5534	695.977	0.705677	1964.54	0	1810.68	1802.35	2.11751	0	1.52926
1193	14316	41316	11.4767	3.97667	12.9767	31.2522	52.7813	20.0467	22.2185	1.08661	997.777	1007.24	0.19822	4187.25	28.5571	696.076	0.705626	1964.68	0	1810.88	1802.55	2.11775	0	1.52926
1194	14328	41328	11.48	3.98	12.98	31.2626	52.7941	20.057	22.229	1.08657	997.774	1007.24	0.19822	4187.24	28.5607	696.175	0.705575	1964.81	0	1811.08	1802.75	2.11798	0	1.52926
1195	14340	41340	11.4833	3.98333	12.9833	31.2729	52.8068	20.0673	22.2395	1.08653	997.771	1007.24	0.19822	4187.23	28.5643	696.273	0.705524	1964.95	0	1811.28	1802.95	2.11821	0	1.52926
1196	14352	41352	11.4867	3.98667	12.9867	31.2833	52.8195	20.0776	22.2501	1.08649	997.768	1007.24	0.19822	4187.22	28.5679	696.371	0.705473	1965.08	0	1811.48	1803.15	2.11844	0	1.52926
1197	14364	41364	11.49	3.99	12.99	31.2936	52.8321	20.0879	22.2606	1.08644	997.765	1007.24	0.19822	4187.21	28.5716	696.467	0.705423	1965.22	0	1811.67	1803.34	2.11867	0	1.52926
1198	14376	41376	11.4933	3.99333	12.9933	31.304	52.8447	20.0982	22.2711	1.0864	997.762	1007.25	0.19822	4187.21	28.5752	696.564	0.705372	1965.35	0	1811.87	1803.54	2.1189	0	1.52926
1199	14388	41388	11.4967	3.99667	12.9967	31.3143	52.8573	20.1085	22.2817	1.08636	997.759	1007.25	0.19822	4187.2	28.5788	696.659	0.705321	1965.48	0	1812.06	1803.73	2.11912	0	1.52926
1200	14400	41400	11.5	4	13	31.3246	52.8699	20.1188	22.2922	1.08632	997.756	1007.25	0.19822	4187.19	28.5824	696.754	0.705271	1965.6	0	1812.25	1803.92	2.11934	0	1.52926
1201	14412	41412	11.5033	4.00333	13.0033	31.3349	52.8824	20.129	22.3027	1.08627	997.754	1007.25	0.19822	4187.18	28.586	696.849	0.70522	1965.73	0	1812.44	1804.11	2.11956	0	1.52926
1202	14424	41424	11.5067	4.00667	13.0067	31.3452	52.8949	20.1393	22.3132	1.08623	997.751	1007.25	0.19822	4187.18	28.5896	696.943	0.70517	1965.85	0	1812.62	1804.3	2.11978	0	1.52926
1203	14436	41436	11.51	4.01	13.01	31.3555	52.9074	20.1496	22.3238	1.08619	997.748	1007.25	0.19822	4187.17	28.5932	697.036	0.705119	1965.97	0	1812.81	1804.49	2.12	0	1.52926
1204	14448	41448	11.5133	4.01333	13.0133	31.3658	52.9198	20.1599	22.3343	1.08615	997.745	1007.25	0.19822	4187.16	28.5967	697.128	0.705069	1966.09	0	1812.99	1804.67	2.12021	0	1.52926
1205	14460	41460	11.5167	4.01667	13.0167	31.3761	52.9322	20.1702	22.3448	1.08611	997.742	1007.25	0.19822	4187.15	28.6003	697.22	0.705018	1966.21	0	1813.17	1804.85	2.12042	0	1.52926
1206	14472	41472	11.52	4.02	13.02	31.3863	52.9446	20.1805	22.3553	1.08607	997.739	1007.25	0.19822	4187.15	28.6039	697.312	0.704968	1966.33	0	1813.35	1805.03	2.12063	0	1.52926
1207	14484	41484	11.5233	4.02333	13.0233	31.3966	52.957	20.1908	22.3659	1.08602	997.736	1007.25	0.19822	4187.14	28.6074	697.402	0.704917	1966.44	0	1813.53	1805.21	2.12084	0	1.52926
1208	14496	41496	11.5267	4.02667	13.0267	31.4068	52.9693	20.2011	22.3764	1.08598	997.733	1007.25	0.19822	4187.13	28.611	697.492	0.704867	1966.56	0	1813.7	1805.39	2.12105	0	1.52926
1209	14508	41508	11.53	4.03	13.03	31.4171	52.9816	20.2115	22.3869	1.08594	997.73	1007.25	0.19822	4187.12	28.6146	697.582	0.704817	1966.67	0	1813.88	1805.57	2.12125	0	1.52926
1210	14520	41520	11.5333	4.03333	13.0333	31.4273	52.9938	20.2218	22.3974	1.0859	997.727	1007.25	0.19822	4187.11	28.6181	697.671	0.704766	1966.78	0	1814.05	1805.74	2.12145	0	1.52926
1211	14532	41532	11.5367	4.03667	13.0367	31.4375	53.0061	20.2321	22.4079	1.08586	997.724	1007.25	0.19822	4187.11	28.6217	697.759	0.704716	1966.89	0	1814.22	1805.91	2.12165	0	1.52926
1212	14544	41544	11.54	4.04	13.04	31.4477	53.0183	20.2424	22.4185	1.08582	997.721	1007.25	0.19822	4187.1	28.6252	697.846	0.704666	1966.99	0	1814.39	1806.08	2.12185	0	1.52926
1213	14556	41556	11.5433	4.04333	13.0433	31.4579	53.0304	20.2527	22.429	1.08578	997.718	1007.26	0.19822	4187.09	28.6287	697.933	0.704616	1967.1	0	1814.56	1806.25	2.12204	0	1.52926
1214	14568	41568	11.5467	4.04667	13.0467	31.4681	53.0426	20.263	22.4395	1.08574	997.716	1007.26	0.19822	4187.08	28.6323	698.019	0.704565	1967.2	0	1814.72	1806.42	2.12224	0	1.52926
1215	14580	41580	11.55	4.05	13.05	31.4783	53.0547	20.2733	22.45	1.0857	997.713	1007.26	0.19822	4187.08	28.6358	698.105	0.704515	1967.3	0	1814.89	1806.58	2.12243	0	1.52926
1216	14592	41592	11.5533	4.05333	13.0533	31.4884	53.0668	20.2836	22.4605	1.08566	997.71	1007.26	0.19822	4187.07	28.6393	698.19	0.704465	1967.4	0	1815.05	1806.75	2.12262	0	1.52926
1217	14604	41604	11.5567	4.05667	13.0567	31.4986	53.0788	20.2939	22.471	1.08562	997.707	1007.26	0.19822	4187.06	28.6428	698.274	0.704415	1967.5	0	1815.21	1806.91	2.1228	0	1.52926
1218	14616	41616	11.56	4.06	13.06	31.5087	53.0908	20.3042	22.4815	1.08558	997.704	1007.26	0.19822	4187.05	28.6464	698.358	0.704365	1967.6	0	1815.37	1807.07	2.12299	0	1.52926
1219	14628	41628	11.5633	4.06333	13.0633	31.5189	53.1028	20.3145	22.492	1.08554	997.701	1007.26	0.19822	4187.05	28.6499	698.441	0.704315	1967.69	0	1815.52	1807.22	2.12317	0	1.52926
1220	14640	41640	11.5667	4.06667	13.0667	31.529	53.1148	20.3248	22.5025	1.0855	997.698	1007.26	0.19822	4187.04	28.6534	698.524	0.704265	1967.78	0	1815.68	1807.38	2.12335	0	1.52926
1221	14652	41652	11.57	4.07	13.07	31.5391	53.1267	20.3352	22.513	1.08546	997.695	1007.26	0.19822	4187.03	28.6569	698.606	0.704215	1967.87	0	1815.83	1807.54	2.12353	0	1.52926
1222	14664	41664	11.5733	4.07333	13.0733	31.5492	53.1386	20.3455	22.5235	1.08542	997.692	1007.26	0.19822	4187.02	28.6604	698.687	0.704165	1967.96	0	1815.98	1807.69	2.12371	0	1.52926
1223	14676	41676	11.5767	4.07667	13.0767	31.5593	53.1504	20.3558	22.534	1.08538	997.689	1007.26	0.19822	4187.02	28.6638	698.767	0.704115	1968.05	0	1816.13	1807.84	2.12388	0	1.52926
1224	14688	41688	11.58	4.08	13.08	31.5694	53.1623	20.3661	22.5445	1.08534	997.686	1007.26	0.19822	4187.01	28.6673	698.847	0.704065	1968.14	0	1816.28	1807.99	2.12406	0	1.52926
1225	14700	41700	11.5833	4.08333	13.0833	31.5795	53.1741	20.3764	22.555	1.0853	997.683	1007.26	0.19822	4187	28.6708	698.927	0.704015	1968.22	0	1816.43	1808.14	2.12423	0	1.52926
1226	14712	41712	11.5867	4.08667	13.0867	31.5895	53.1858	20.3867	22.5655	1.08526	997.68	1007.26	0.19822	4186.99	28.6743	699.006	0.703965	1968.3	0	1816.57	1808.28	2.1244	0	1.52926
1227	14724	41724	11.59	4.09	13.09	31.5996	53.1976	20.3971	22.576	1.08522	997.677	1007.26	0.19822	4186.99	28.6777	699.084	0.703916	1968.38	0	1816.71	1808.43	2.12456	0	1.52926
1228	14736	41736	11.5933	4.09333	13.0933	31.6097	53.2093	20.4074	22.5865	1.08518	997.674	1007.26	0.19822	4186.98	28.6812	699.161	0.703866	1968.46	0	1816.85	1808.57	2.12473	0	1.52926
1229	14748	41748	11.5967	4.09667	13.0967	31.6197	53.221	20.4177	22.597	1.08514	997.672	1007.27	0.19822	4186.97	28.6847	699.238	0.703816	1968.54	0	1816.99	1808.71	2.12489	0	1.52926
1230	14760	41760	11.6	4.1	13.1	31.6297	53.2326	20.428	22.6075	1.0851	997.669	1007.27	0.19822	4186.96	28.6881	699.314	0.703766	1968.62	0	1817.13	1808.85	2.12505	0	1.52926
1231	14772	41772	11.6033	4.10333	13.1033	31.6397	53.2442	20.4383	22.618	1.08506	997.666	1007.27	0.19822	4186.96	28.6916	699.39	0.703717	1968.69	0	1817.26	1808.99	2.12521	0	1.52926
1232	14784	41784	11.6067	4.10667	13.1067	31.6497	53.2558	20.4487	22.6285	1.08503	997.663	1007.27	0.19822	4186.95	28.695	699.465	0.703667	1968.76	0	1817.4	1809.12	2.12537	0	1.52926
1233	14796	41796	11.61	4.11	13.11	31.6597	53.2674	20.459	22.639	1.08499	997.66	1007.27	0.19822	4186.94	28.6984	699.539	0.703617	1968.83	0	1817.53	1809.26	2.12552	0	1.52926
1234	14808	41808	11.6133	4.11333	13.1133	31.6697	53.2789	20.4693	22.6495	1.08495	997.657	1007.27	0.19822	4186.93	28.7019	699.613	0.703568	1968.9	0	1817.66	1809.39	2.12567	0	1.52926
1235	14820	41820	11.6167	4.11667	13.1167	31.6797	53.2904	20.4796	22.66	1.08491	997.654	1007.27	0.19822	4186.93	28.7053	699.686	0.703518	1968.97	0	1817.79	1809.52	2.12582	0	1.52926
1236	14832	41832	11.62	4.12	13.12	31.6897	53.3019	20.49	22.6704	1.08487	997.651	1007.27	0.19822	4186.92	28.7087	699.758	0.703469	1969.03	0	1817.92	1809.65	2.12597	0	1.52926
1237	14844	41844	11.6233	4.12333	13.1233	31.6997	53.3133	20.5003	22.6809	1.08483	997.648	1007.27	0.19822	4186.91	28.7121	699.83	0.703419	1969.1	0	1818.04	1809.77	2.12612	0	1.52926
1238	14856	41856	11.6267	4.12667	13.1267	31.7096	53.3247	20.5106	22.6914	1.0848	997.645	1007.27	0.19822	4186.9	28.7156	699.901	0.70337	1969.16	0	1818.16	1809.9	2.12626	0	1.52926
1239	14868	41868	11.63	4.13	13.13	31.7195	53.3361	20.5209	22.7019	1.08476	997.642	1007.27	0.19822	4186.9	28.719	699.972	0.70332	1969.22	0	1818.29	1810.02	2.1264	0	1.52926
1240	14880	41880	11.6333	4.13333	13.1333	31.7295	53.3474	20.5313	22.7124	1.08472	997.639	1007.27	0.19822	4186.89	28.7224	700.042	0.703271	1969.28	0	1818.4	1810.14	2.12654	0	1.52926
1241	14892	41892	11.6367	4.13667	13.1367	31.7394	53.3587	20.5416	22.7228	1.08468	997.636	1007.27	0.19822	4186.88	28.7258	700.111	0.703221	1969.33	0	1818.52	1810.26	2.12668	0	1.52926
1242	14904	41904	11.64	4.14	13.14	31.7493	53.37	20.5519	22.7333	1.08464	997.633	1007.27	0.19822	4186.87	28.7292	700.18	0.703172	1969.39	0	1818.64	1810.38	2.12682	0	1.52926
1243	14916	41916	11.6433	4.14333	13.1433	31.7592	53.3812	20.5623	22.7438	1.08461	997.63	1007.27	0.19822	4186.86	28.7325	700.248	0.703123	1969.44	0	1818.75	1810.5	2.12695	0	1.52926
1244	14928	41928	11.6467	4.14667	13.1467	31.7691	53.3925	20.5726	22.7543	1.08457	997.627	1007.27	0.19822	4186.86	28.7359	700.315	0.703073	1969.49	0	1818.87	1810.61	2.12708	0	1.52926
1245	14940	41940	11.65	4.15	13.15	31.779	53.4036	20.5829	22.7647	1.08453	997.624	1007.27	0.19822	4186.85	28.7393	700.382	0.703024	1969.54	0	1818.98	1810.72	2.12721	0	1.52926
1246	14952	41952	11.6533	4.15333	13.1533	31.7888	53.4148	20.5933	22.7752	1.08449	997.621	1007.28	0.19822	4186.84	28.7427	700.448	0.702975	1969.59	0	1819.09	1810.83	2.12734	0	1.52926
1247	14964	41964	11.6567	4.15667	13.1567	31.7987	53.4259	20.6036	22.7857	1.08446	997.619	1007.28	0.19822	4186.83	28.7461	700.513	0.702925	1969.63	0	1819.19	1810.94	2.12747	0	1.52926
1248	14976	41976	11.66	4.16	13.16	31.8086	53.437	20.6139	22.7961	1.08442	997.616	1007.28	0.19822	4186.83	28.7494	700.578	0.702876	1969.68	0	1819.3	1811.05	2.12759	0	1.52926
1249	14988	41988	11.6633	4.16333	13.1633	31.8184	53.4481	20.6243	22.8066	1.08438	997.613	1007.28	0.19822	4186.82	28.7528	700.642	0.702827	1969.72	0	1819.4	1811.16	2.12771	0	1.52926
1250	15000	42000	11.6667	4.16667	13.1667	31.8282	53.4591	20.6346	22.8171	1.08435	997.61	1007.28	0.19822	4186.81	28.7561	700.706	0.702778	1969.76	0	1819.5	1811.26	2.12783	0	1.52926
1251	15012	42012	11.67	4.17	13.17	31.8381	53.4701	20.6449	22.8275	1.08431	997.607	1007.28	0.19822	4186.8	28.7595	700.769	0.702729	1969.8	0	1819.6	1811.36	2.12795	0	1.52926
1252	15024	42024	11.6733	4.17333	13.1733	31.8479	53.4811	20.6553	22.838	1.08427	997.604	1007.28	0.19822	4186.8	28.7628	700.831	0.70268	1969.84	0	1819.7	1811.46	2.12806	0	1.52926
1253	15036	42036	11.6767	4.17667	13.1767	31.8577	53.492	20.6656	22.8484	1.08424	997.601	1007.28	0.19822	4186.79	28.7662	700.893	0.702631	1969.88	0	1819.8	1811.56	2.12818	0	1.52926
1254	15048	42048	11.68	4.18	13.18	31.8675	53.5029	20.6759	22.8589	1.0842	997.598	1007.28	0.19822	4186.78	28.7695	700.954	0.702581	1969.91	0	1819.9	1811.66	2.12829	0	1.52926
1255	15060	42060	11.6833	4.18333	13.1833	31.8772	53.5138	20.6863	22.8694	1.08416	997.595	1007.28	0.19822	4186.77	28.7728	701.015	0.702532	1969.94	0	1819.99	1811.75	2.1284	0	1.52926
1256	15072	42072	11.6867	4.18667	13.1867	31.887	53.5247	20.6966	22.8798	1.08413	997.592	1007.28	0.19822	4186.77	28.7761	701.074	0.702483	1969.97	0	1820.08	1811.85	2.1285	0	1.52926
1257	15084	42084	11.69	4.19	13.19	31.8968	53.5355	20.7069	22.8903	1.08409	997.589	1007.28	0.19822	4186.76	28.7795	701.134	0.702434	1970	0	1820.17	1811.94	2.12861	0	1.52926
1258	15096	42096	11.6933	4.19333	13.1933	31.9065	53.5463	20.7173	22.9007	1.08406	997.586	1007.28	0.19822	4186.75	28.7828	701.192	0.702385	1970.03	0	1820.26	1812.03	2.12871	0	1.52926
1259	15108	42108	11.6967	4.19667	13.1967	31.9163	53.557	20.7276	22.9112	1.08402	997.583	1007.28	0.19822	4186.75	28.7861	701.25	0.702336	1970.05	0	1820.34	1812.12	2.12881	0	1.52926
1260	15120	42120	11.7	4.2	13.2	31.926	53.5677	20.7379	22.9216	1.08398	997.58	1007.28	0.19822	4186.74	28.7894	701.307	0.702288	1970.08	0	1820.43	1812.2	2.12891	0	1.52926
1261	15132	42132	11.7033	4.20333	13.2033	31.9357	53.5784	20.7483	22.932	1.08395	997.577	1007.28	0.19822	4186.73	28.7927	701.364	0.702239	1970.1	0	1820.51	1812.29	2.12901	0	1.52926
1262	15144	42144	11.7067	4.20667	13.2067	31.9454	53.5891	20.7586	22.9425	1.08391	997.574	1007.28	0.19822	4186.72	28.796	701.42	0.70219	1970.12	0	1820.59	1812.37	2.1291	0	1.52926
1263	15156	42156	11.71	4.21	13.21	31.9551	53.5997	20.769	22.9529	1.08388	997.571	1007.29	0.19822	4186.72	28.7993	701.476	0.702141	1970.14	0	1820.67	1812.45	2.12919	0	1.52926
1264	15168	42168	11.7133	4.21333	13.2133	31.9648	53.6103	20.7793	22.9634	1.08384	997.568	1007.29	0.19822	4186.71	28.8025	701.53	0.702092	1970.16	0	1820.75	1812.53	2.12928	0	1.52926
1265	15180	42180	11.7167	4.21667	13.2167	31.9745	53.6209	20.7896	22.9738	1.08381	997.565	1007.29	0.19822	4186.7	28.8058	701.584	0.702043	1970.17	0	1820.82	1812.61	2.12937	0	1.52926
1266	15192	42192	11.72	4.22	13.22	31.9842	53.6314	20.8	22.9842	1.08377	997.562	1007.29	0.19822	4186.69	28.8091	701.638	0.701995	1970.18	0	1820.9	1812.68	2.12946	0	1.52926
1267	15204	42204	11.7233	4.22333	13.2233	31.9938	53.6419	20.8103	22.9947	1.08374	997.559	1007.29	0.19822	4186.69	28.8124	701.691	0.701946	1970.2	0	1820.97	1812.76	2.12954	0	1.52926
1268	15216	42216	11.7267	4.22667	13.2267	32.0035	53.6524	20.8207	23.0051	1.0837	997.556	1007.29	0.19822	4186.68	28.8156	701.743	0.701897	1970.21	0	1821.04	1812.83	2.12963	0	1.52926
1269	15228	42228	11.73	4.23	13.23	32.0131	53.6629	20.831	23.0155	1.08367	997.553	1007.29	0.19822	4186.67	28.8189	701.795	0.701848	1970.21	0	1821.11	1812.9	2.12971	0	1.52926
1270	15240	42240	11.7333	4.23333	13.2333	32.0228	53.6733	20.8414	23.026	1.08363	997.55	1007.29	0.19822	4186.66	28.8221	701.846	0.7018	1970.22	0	1821.18	1812.97	2.12978	0	1.52926
1271	15252	42252	11.7367	4.23667	13.2367	32.0324	53.6836	20.8517	23.0364	1.0836	997.548	1007.29	0.19822	4186.66	28.8254	701.896	0.701751	1970.23	0	1821.24	1813.04	2.12986	0	1.52926
1272	15264	42264	11.74	4.24	13.24	32.042	53.694	20.862	23.0468	1.08356	997.545	1007.29	0.19822	4186.65	28.8286	701.946	0.701702	1970.23	0	1821.3	1813.1	2.12993	0	1.52926
1273	15276	42276	11.7433	4.24333	13.2433	32.0516	53.7043	20.8724	23.0572	1.08353	997.542	1007.29	0.19822	4186.64	28.8319	701.995	0.701654	1970.23	0	1821.37	1813.16	2.13001	0	1.52926
1274	15288	42288	11.7467	4.24667	13.2467	32.0612	53.7146	20.8827	23.0677	1.08349	997.539	1007.29	0.19822	4186.63	28.8351	702.043	0.701605	1970.23	0	1821.42	1813.23	2.13008	0	1.52926
1275	15300	42300	11.75	4.25	13.25	32.0708	53.7249	20.8931	23.0781	1.08346	997.536	1007.29	0.19822	4186.63	28.8383	702.091	0.701557	1970.23	0	1821.48	1813.29	2.13014	0	1.52926
1276	15312	42312	11.7533	4.25333	13.2533	32.0803	53.7351	20.9034	23.0885	1.08343	997.533	1007.29	0.19822	4186.62	28.8415	702.138	0.701508	1970.22	0	1821.54	1813.34	2.13021	0	1.52926
1277	15324	42324	11.7567	4.25667	13.2567	32.0899	53.7453	20.9138	23.0989	1.08339	997.53	1007.29	0.19822	4186.61	28.8448	702.185	0.70146	1970.22	0	1821.59	1813.4	2.13027	0	1.52926
1278	15336	42336	11.76	4.26	13.26	32.0995	53.7554	20.9241	23.1093	1.08336	997.527	1007.29	0.19822	4186.6	28.848	702.231	0.701411	1970.21	0	1821.65	1813.46	2.13033	0	1.52926
1279	15348	42348	11.7633	4.26333	13.2633	32.109	53.7656	20.9345	23.1198	1.08332	997.524	1007.29	0.19822	4186.6	28.8512	702.276	0.701363	1970.2	0	1821.7	1813.51	2.13039	0	1.52926
1280	15360	42360	11.7667	4.26667	13.2667	32.1185	53.7757	20.9448	23.1302	1.08329	997.521	1007.29	0.19822	4186.59	28.8544	702.321	0.701314	1970.19	0	1821.75	1813.56	2.13045	0	1.52926
1281	15372	42372	11.77	4.27	13.27	32.128	53.7858	20.9551	23.1406	1.08326	997.518	1007.3	0.19822	4186.58	28.8576	702.365	0.701266	1970.18	0	1821.79	1813.61	2.13051	0	1.52926
1282	15384	42384	11.7733	4.27333	13.2733	32.1376	53.7958	20.9655	23.151	1.08322	997.515	1007.3	0.19822	4186.57	28.8608	702.408	0.701218	1970.16	0	1821.84	1813.66	2.13056	0	1.52926
1283	15396	42396	11.7767	4.27667	13.2767	32.1471	53.8058	20.9758	23.1614	1.08319	997.512	1007.3	0.19822	4186.57	28.864	702.451	0.701169	1970.15	0	1821.88	1813.7	2.13061	0	1.52926
1284	15408	42408	11.78	4.28	13.28	32.1565	53.8158	20.9862	23.1718	1.08316	997.509	1007.3	0.19822	4186.56	28.8671	702.493	0.701121	1970.13	0	1821.92	1813.75	2.13066	0	1.52926
1285	15420	42420	11.7833	4.28333	13.2833	32.166	53.8257	20.9965	23.1822	1.08312	997.506	1007.3	0.19822	4186.55	28.8703	702.534	0.701073	1970.11	0	1821.96	1813.79	2.13071	0	1.52926
1286	15432	42432	11.7867	4.28667	13.2867	32.1755	53.8356	21.0069	23.1926	1.08309	997.503	1007.3	0.19822	4186.54	28.8735	702.575	0.701024	1970.09	0	1822	1813.83	2.13075	0	1.52926
1287	15444	42444	11.79	4.29	13.29	32.1849	53.8455	21.0172	23.203	1.08306	997.5	1007.3	0.19822	4186.54	28.8766	702.616	0.700976	1970.07	0	1822.04	1813.87	2.13079	0	1.52926
1288	15456	42456	11.7933	4.29333	13.2933	32.1944	53.8554	21.0276	23.2134	1.08303	997.497	1007.3	0.19822	4186.53	28.8798	702.655	0.700928	1970.04	0	1822.07	1813.91	2.13083	0	1.52926
1289	15468	42468	11.7967	4.29667	13.2967	32.2038	53.8652	21.0379	23.2238	1.08299	997.494	1007.3	0.19822	4186.52	28.883	702.694	0.70088	1970.02	0	1822.11	1813.94	2.13087	0	1.52926
1290	15480	42480	11.8	4.3	13.3	32.2133	53.875	21.0483	23.2342	1.08296	997.491	1007.3	0.19822	4186.52	28.8861	702.732	0.700831	1969.99	0	1822.14	1813.97	2.13091	0	1.52926
1291	15492	42492	11.8033	4.30333	13.3033	32.2227	53.8847	21.0586	23.2445	1.08293	997.488	1007.3	0.19822	4186.51	28.8893	702.77	0.700783	1969.96	0	1822.17	1814.01	2.13094	0	1.52926
1292	15504	42504	11.8067	4.30667	13.3067	32.2321	53.8945	21.069	23.2549	1.0829	997.485	1007.3	0.19822	4186.5	28.8924	702.807	0.700735	1969.93	0	1822.2	1814.04	2.13098	0	1.52926
1293	15516	42516	11.81	4.31	13.31	32.2415	53.9042	21.0793	23.2653	1.08286	997.482	1007.3	0.19822	4186.49	28.8955	702.844	0.700687	1969.89	0	1822.22	1814.06	2.13101	0	1.52926
1294	15528	42528	11.8133	4.31333	13.3133	32.2509	53.9138	21.0896	23.2757	1.08283	997.479	1007.3	0.19822	4186.49	28.8987	702.879	0.700639	1969.86	0	1822.25	1814.09	2.13104	0	1.52926
1295	15540	42540	11.8167	4.31667	13.3167	32.2602	53.9235	21.1	23.2861	1.0828	997.476	1007.3	0.19822	4186.48	28.9018	702.915	0.700591	1969.82	0	1822.27	1814.12	2.13106	0	1.52926
1296	15552	42552	11.82	4.32	13.32	32.2696	53.9331	21.1103	23.2965	1.08277	997.473	1007.3	0.19822	4186.47	28.9049	702.949	0.700543	1969.78	0	1822.29	1814.14	2.13109	0	1.52926
1297	15564	42564	11.8233	4.32333	13.3233	32.279	53.9426	21.1207	23.3068	1.08273	997.47	1007.3	0.19822	4186.46	28.908	702.983	0.700494	1969.74	0	1822.31	1814.16	2.13111	0	1.52926
1298	15576	42576	11.8267	4.32667	13.3267	32.2883	53.9522	21.131	23.3172	1.0827	997.467	1007.3	0.19822	4186.46	28.9111	703.016	0.700446	1969.7	0	1822.33	1814.18	2.13113	0	1.52926
1299	15588	42588	11.83	4.33	13.33	32.2976	53.9617	21.1414	23.3276	1.08267	997.464	1007.3	0.19822	4186.45	28.9142	703.049	0.700398	1969.66	0	1822.34	1814.2	2.13115	0	1.52926
1300	15600	42600	11.8333	4.33333	13.3333	32.307	53.9711	21.1517	23.338	1.08264	997.461	1007.3	0.19822	4186.44	28.9173	703.081	0.70035	1969.61	0	1822.35	1814.21	2.13116	0	1.52926
1301	15612	42612	11.8367	4.33667	13.3367	32.3163	53.9806	21.1621	23.3483	1.08261	997.458	1007.31	0.19822	4186.43	28.9204	703.112	0.700302	1969.57	0	1822.37	1814.23	2.13118	0	1.52926
1302	15624	42624	11.84	4.34	13.34	32.3256	53.99	21.1724	23.3587	1.08258	997.455	1007.31	0.19822	4186.43	28.9235	703.143	0.700255	1969.52	0	1822.38	1814.24	2.13119	0	1.52926
1303	15636	42636	11.8433	4.34333	13.3433	32.3349	53.9994	21.1828	23.3691	1.08255	997.452	1007.31	0.19822	4186.42	28.9266	703.173	0.700207	1969.47	0	1822.38	1814.25	2.1312	0	1.52926
1304	15648	42648	11.8467	4.34667	13.3467	32.3442	54.0087	21.1931	23.3794	1.08251	997.449	1007.31	0.19822	4186.41	28.9297	703.203	0.700159	1969.41	0	1822.39	1814.26	2.13121	0	1.52926
1305	15660	42660	11.85	4.35	13.35	32.3534	54.0181	21.2035	23.3898	1.08248	997.446	1007.31	0.19822	4186.41	28.9328	703.231	0.700111	1969.36	0	1822.4	1814.27	2.13121	0	1.52926
1306	15672	42672	11.8533	4.35333	13.3533	32.3627	54.0273	21.2138	23.4001	1.08245	997.443	1007.31	0.19822	4186.4	28.9358	703.26	0.700063	1969.3	0	1822.4	1814.27	2.13121	0	1.52926
1307	15684	42684	11.8567	4.35667	13.3567	32.372	54.0366	21.2242	23.4105	1.08242	997.44	1007.31	0.19822	4186.39	28.9389	703.287	0.700015	1969.25	0	1822.4	1814.27	2.13122	0	1.52926
1308	15696	42696	11.86	4.36	13.36	32.3812	54.0458	21.2345	23.4208	1.08239	997.437	1007.31	0.19822	4186.38	28.942	703.314	0.699967	1969.19	0	1822.4	1814.28	2.13122	0	1.52926
1309	15708	42708	11.8633	4.36333	13.3633	32.3904	54.055	21.2449	23.4312	1.08236	997.434	1007.31	0.19822	4186.38	28.945	703.34	0.69992	1969.13	0	1822.4	1814.28	2.13121	0	1.52926
1310	15720	42720	11.8667	4.36667	13.3667	32.3997	54.0642	21.2552	23.4415	1.08233	997.431	1007.31	0.19822	4186.37	28.9481	703.366	0.699872	1969.06	0	1822.39	1814.27	2.13121	0	1.52926
1311	15732	42732	11.87	4.37	13.37	32.4089	54.0733	21.2656	23.4519	1.0823	997.428	1007.31	0.19822	4186.36	28.9511	703.391	0.699824	1969	0	1822.39	1814.27	2.1312	0	1.52926
1312	15744	42744	11.8733	4.37333	13.3733	32.4181	54.0824	21.2759	23.4622	1.08227	997.425	1007.31	0.19822	4186.35	28.9541	703.416	0.699776	1968.93	0	1822.38	1814.27	2.13119	0	1.52926
1313	15756	42756	11.8767	4.37667	13.3767	32.4273	54.0915	21.2862	23.4726	1.08224	997.422	1007.31	0.19822	4186.35	28.9572	703.439	0.699729	1968.87	0	1822.37	1814.26	2.13118	0	1.52926
1314	15768	42768	11.88	4.38	13.38	32.4364	54.1005	21.2966	23.4829	1.08221	997.419	1007.31	0.19822	4186.34	28.9602	703.462	0.699681	1968.8	0	1822.36	1814.25	2.13117	0	1.52926
1315	15780	42780	11.8833	4.38333	13.3833	32.4456	54.1095	21.3069	23.4933	1.08218	997.416	1007.31	0.19822	4186.33	28.9632	703.485	0.699633	1968.73	0	1822.35	1814.24	2.13115	0	1.52926
1316	15792	42792	11.8867	4.38667	13.3867	32.4548	54.1185	21.3173	23.5036	1.08215	997.413	1007.31	0.19822	4186.33	28.9662	703.507	0.699585	1968.65	0	1822.33	1814.23	2.13113	0	1.52926
1317	15804	42804	11.89	4.39	13.39	32.4639	54.1274	21.3276	23.5139	1.08212	997.41	1007.31	0.19822	4186.32	28.9692	703.528	0.699538	1968.58	0	1822.31	1814.21	2.13112	0	1.52926
1318	15816	42816	11.8933	4.39333	13.3933	32.473	54.1363	21.338	23.5243	1.08209	997.407	1007.31	0.19822	4186.31	28.9723	703.549	0.69949	1968.5	0	1822.3	1814.2	2.13109	0	1.52926
1319	15828	42828	11.8967	4.39667	13.3967	32.4822	54.1452	21.3483	23.5346	1.08206	997.404	1007.31	0.19822	4186.3	28.9753	703.569	0.699443	1968.42	0	1822.28	1814.18	2.13107	0	1.52926
1320	15840	42840	11.9	4.4	13.4	32.4913	54.1541	21.3587	23.5449	1.08203	997.401	1007.31	0.19822	4186.3	28.9783	703.588	0.699395	1968.34	0	1822.25	1814.16	2.13104	0	1.52926
1321	15852	42852	11.9033	4.40333	13.4033	32.5004	54.1629	21.369	23.5552	1.082	997.398	1007.32	0.19822	4186.29	28.9812	703.607	0.699347	1968.26	0	1822.23	1814.14	2.13102	0	1.52926
1322	15864	42864	11.9067	4.40667	13.4067	32.5095	54.1717	21.3794	23.5656	1.08197	997.395	1007.32	0.19822	4186.28	28.9842	703.625	0.6993	1968.18	0	1822.2	1814.12	2.13099	0	1.52926
1323	15876	42876	11.91	4.41	13.41	32.5186	54.1804	21.3897	23.5759	1.08194	997.392	1007.32	0.19822	4186.27	28.9872	703.642	0.699252	1968.09	0	1822.18	1814.09	2.13096	0	1.52926
1324	15888	42888	11.9133	4.41333	13.4133	32.5277	54.1891	21.4001	23.5862	1.08191	997.389	1007.32	0.19822	4186.27	28.9902	703.659	0.699205	1968.01	0	1822.15	1814.06	2.13092	0	1.52926
1325	15900	42900	11.9167	4.41667	13.4167	32.5367	54.1978	21.4104	23.5965	1.08189	997.386	1007.32	0.19822	4186.26	28.9932	703.675	0.699157	1967.92	0	1822.12	1814.04	2.13089	0	1.52926
1326	15912	42912	11.92	4.42	13.42	32.5458	54.2065	21.4207	23.6068	1.08186	997.383	1007.32	0.19822	4186.25	28.9961	703.691	0.69911	1967.83	0	1822.08	1814.01	2.13085	0	1.52926
1327	15924	42924	11.9233	4.42333	13.4233	32.5548	54.2151	21.4311	23.6171	1.08183	997.38	1007.32	0.19822	4186.25	28.9991	703.706	0.699062	1967.74	0	1822.05	1813.97	2.13081	0	1.52926
1328	15936	42936	11.9267	4.42667	13.4267	32.5639	54.2237	21.4414	23.6274	1.0818	997.377	1007.32	0.19822	4186.24	29.002	703.72	0.699015	1967.64	0	1822.01	1813.94	2.13076	0	1.52926
1329	15948	42948	11.93	4.43	13.43	32.5729	54.2323	21.4518	23.6377	1.08177	997.374	1007.32	0.19822	4186.23	29.005	703.733	0.698968	1967.55	0	1821.98	1813.9	2.13072	0	1.52926
1330	15960	42960	11.9333	4.43333	13.4333	32.5819	54.2408	21.4621	23.648	1.08174	997.371	1007.32	0.19822	4186.22	29.0079	703.746	0.69892	1967.45	0	1821.94	1813.87	2.13067	0	1.52926
1331	15972	42972	11.9367	4.43667	13.4367	32.5909	54.2493	21.4725	23.6583	1.08171	997.368	1007.32	0.19822	4186.22	29.0109	703.759	0.698873	1967.35	0	1821.89	1813.83	2.13063	0	1.52926
1332	15984	42984	11.94	4.44	13.44	32.5999	54.2577	21.4828	23.6686	1.08169	997.365	1007.32	0.19822	4186.21	29.0138	703.77	0.698826	1967.25	0	1821.85	1813.79	2.13057	0	1.52926
1333	15996	42996	11.9433	4.44333	13.4433	32.6089	54.2662	21.4932	23.6789	1.08166	997.362	1007.32	0.19822	4186.2	29.0167	703.782	0.698778	1967.15	0	1821.81	1813.75	2.13052	0	1.52926
1334	16008	43008	11.9467	4.44667	13.4467	32.6178	54.2746	21.5035	23.6892	1.08163	997.359	1007.32	0.19822	4186.2	29.0197	703.792	0.698731	1967.04	0	1821.76	1813.7	2.13047	0	1.52926
1335	16020	43020	11.95	4.45	13.45	32.6268	54.283	21.5138	23.6995	1.0816	997.356	1007.32	0.19822	4186.19	29.0226	703.802	0.698684	1966.94	0	1821.71	1813.66	2.13041	0	1.52926
1336	16032	43032	11.9533	4.45333	13.4533	32.6357	54.2913	21.5242	23.7098	1.08158	997.353	1007.32	0.19822	4186.18	29.0255	703.811	0.698636	1966.83	0	1821.66	1813.61	2.13035	0	1.52926
1337	16044	43044	11.9567	4.45667	13.4567	32.6447	54.2996	21.5345	23.7201	1.08155	997.35	1007.32	0.19822	4186.17	29.0284	703.82	0.698589	1966.72	0	1821.61	1813.56	2.13029	0	1.52926
1338	16056	43056	11.96	4.46	13.46	32.6536	54.3079	21.5449	23.7304	1.08152	997.347	1007.32	0.19822	4186.17	29.0313	703.828	0.698542	1966.61	0	1821.55	1813.51	2.13023	0	1.52926
1339	16068	43068	11.9633	4.46333	13.4633	32.6625	54.3161	21.5552	23.7407	1.08149	997.344	1007.32	0.19822	4186.16	29.0342	703.835	0.698495	1966.5	0	1821.5	1813.45	2.13016	0	1.52926
1340	16080	43080	11.9667	4.46667	13.4667	32.6714	54.3243	21.5655	23.7509	1.08147	997.341	1007.32	0.19822	4186.15	29.0371	703.841	0.698447	1966.38	0	1821.44	1813.4	2.13009	0	1.52926
1341	16092	43092	11.97	4.47	13.47	32.6803	54.3325	21.5759	23.7612	1.08144	997.338	1007.32	0.19822	4186.14	29.04	703.848	0.6984	1966.27	0	1821.38	1813.34	2.13003	0	1.52926
1342	16104	43104	11.9733	4.47333	13.4733	32.6892	54.3407	21.5862	23.7715	1.08141	997.335	1007.32	0.19822	4186.14	29.0429	703.853	0.698353	1966.15	0	1821.32	1813.28	2.12995	0	1.52926
1343	16116	43116	11.9767	4.47667	13.4767	32.6981	54.3488	21.5966	23.7818	1.08138	997.332	1007.33	0.19822	4186.13	29.0457	703.858	0.698306	1966.03	0	1821.26	1813.22	2.12988	0	1.52926
1344	16128	43128	11.98	4.48	13.48	32.707	54.3569	21.6069	23.792	1.08136	997.329	1007.33	0.19822	4186.12	29.0486	703.862	0.698259	1965.91	0	1821.19	1813.16	2.1298	0	1.52926
1345	16140	43140	11.9833	4.48333	13.4833	32.7158	54.3649	21.6172	23.8023	1.08133	997.326	1007.33	0.19822	4186.12	29.0515	703.865	0.698211	1965.79	0	1821.13	1813.1	2.12973	0	1.52926
1346	16152	43152	11.9867	4.48667	13.4867	32.7247	54.373	21.6276	23.8126	1.0813	997.323	1007.33	0.19822	4186.11	29.0543	703.868	0.698164	1965.66	0	1821.06	1813.03	2.12965	0	1.52926
1347	16164	43164	11.99	4.49	13.49	32.7335	54.381	21.6379	23.8228	1.08128	997.32	1007.33	0.19822	4186.1	29.0572	703.87	0.698117	1965.54	0	1820.99	1812.97	2.12957	0	1.52926
1348	16176	43176	11.9933	4.49333	13.4933	32.7423	54.3889	21.6483	23.8331	1.08125	997.317	1007.33	0.19822	4186.09	29.06	703.872	0.69807	1965.41	0	1820.92	1812.9	2.12948	0	1.52926
1349	16188	43188	11.9967	4.49667	13.4967	32.7511	54.3968	21.6586	23.8433	1.08122	997.314	1007.33	0.19822	4186.09	29.0629	703.873	0.698023	1965.28	0	1820.84	1812.83	2.1294	0	1.52926
1350	16200	43200	12	4.5	13.5	32.7599	54.4047	21.6689	23.8536	1.0812	997.311	1007.33	0.19822	4186.08	29.0657	703.873	0.697976	1965.15	0	1820.77	1812.75	2.12931	0	1.52926
1351	16212	43212	12.0033	4.50333	13.5033	32.7687	54.4126	21.6793	23.8638	1.08117	997.308	1007.33	0.19822	4186.07	29.0686	703.873	0.697929	1965.01	0	1820.69	1812.68	2.12922	0	1.52926
1352	16224	43224	12.0067	4.50667	13.5067	32.7775	54.4204	21.6896	23.8741	1.08115	997.305	1007.33	0.19822	4186.07	29.0714	703.872	0.697882	1964.88	0	1820.61	1812.6	2.12913	0	1.52926
1353	16236	43236	12.01	4.51	13.51	32.7863	54.4282	21.6999	23.8843	1.08112	997.302	1007.33	0.19822	4186.06	29.0742	703.87	0.697835	1964.74	0	1820.53	1812.52	2.12903	0	1.52926
1354	16248	43248	12.0133	4.51333	13.5133	32.795	54.436	21.7103	23.8946	1.08109	997.299	1007.33	0.19822	4186.05	29.077	703.868	0.697788	1964.6	0	1820.45	1812.44	2.12893	0	1.52926
1355	16260	43260	12.0167	4.51667	13.5167	32.8038	54.4437	21.7206	23.9048	1.08107	997.296	1007.33	0.19822	4186.04	29.0799	703.865	0.697741	1964.46	0	1820.36	1812.36	2.12884	0	1.52926
1356	16272	43272	12.02	4.52	13.52	32.8125	54.4515	21.7309	23.915	1.08104	997.293	1007.33	0.19822	4186.04	29.0827	703.862	0.697694	1964.32	0	1820.28	1812.28	2.12874	0	1.52926
1357	16284	43284	12.0233	4.52333	13.5233	32.8212	54.4591	21.7413	23.9253	1.08102	997.29	1007.33	0.19822	4186.03	29.0855	703.858	0.697647	1964.18	0	1820.19	1812.2	2.12863	0	1.52926
1358	16296	43296	12.0267	4.52667	13.5267	32.8299	54.4668	21.7516	23.9355	1.08099	997.287	1007.33	0.19822	4186.02	29.0883	703.853	0.6976	1964.03	0	1820.1	1812.11	2.12853	0	1.52926
1359	16308	43308	12.03	4.53	13.53	32.8386	54.4744	21.7619	23.9457	1.08097	997.284	1007.33	0.19822	4186.02	29.0911	703.848	0.697553	1963.88	0	1820.01	1812.02	2.12842	0	1.52926
1360	16320	43320	12.0333	4.53333	13.5333	32.8473	54.482	21.7723	23.956	1.08094	997.281	1007.33	0.19822	4186.01	29.0938	703.841	0.697507	1963.74	0	1819.92	1811.93	2.12831	0	1.52926
1361	16332	43332	12.0367	4.53667	13.5367	32.856	54.4895	21.7826	23.9662	1.08092	997.278	1007.33	0.19822	4186	29.0966	703.835	0.69746	1963.59	0	1819.82	1811.84	2.1282	0	1.52926
1362	16344	43344	12.04	4.54	13.54	32.8647	54.497	21.7929	23.9764	1.08089	997.275	1007.33	0.19822	4186	29.0994	703.828	0.697413	1963.43	0	1819.73	1811.74	2.12809	0	1.52926
1363	16356	43356	12.0433	4.54333	13.5433	32.8734	54.5045	21.8032	23.9866	1.08087	997.272	1007.33	0.19822	4185.99	29.1022	703.82	0.697366	1963.28	0	1819.63	1811.65	2.12797	0	1.52926
1364	16368	43368	12.0467	4.54667	13.5467	32.882	54.512	21.8136	23.9968	1.08084	997.269	1007.33	0.19822	4185.98	29.1049	703.811	0.697319	1963.12	0	1819.53	1811.55	2.12786	0	1.52926
1365	16380	43380	12.05	4.55	13.55	32.8907	54.5194	21.8239	24.007	1.08082	997.266	1007.33	0.19822	4185.97	29.1077	703.802	0.697272	1962.97	0	1819.42	1811.45	2.12774	0	1.52926
1366	16392	43392	12.0533	4.55333	13.5533	32.8993	54.5268	21.8342	24.0173	1.08079	997.263	1007.33	0.19822	4185.97	29.1105	703.792	0.697226	1962.81	0	1819.32	1811.35	2.12762	0	1.52926
1367	16404	43404	12.0567	4.55667	13.5567	32.9079	54.5341	21.8446	24.0275	1.08077	997.26	1007.33	0.19822	4185.96	29.1132	703.782	0.697179	1962.65	0	1819.22	1811.25	2.12749	0	1.52926
1368	16416	43416	12.06	4.56	13.56	32.9165	54.5414	21.8549	24.0377	1.08074	997.257	1007.34	0.19822	4185.95	29.116	703.77	0.697132	1962.48	0	1819.11	1811.14	2.12737	0	1.52926
1369	16428	43428	12.0633	4.56333	13.5633	32.9251	54.5487	21.8652	24.0479	1.08072	997.254	1007.34	0.19822	4185.95	29.1187	703.759	0.697085	1962.32	0	1819	1811.04	2.12724	0	1.52926
1370	16440	43440	12.0667	4.56667	13.5667	32.9337	54.556	21.8755	24.0581	1.0807	997.251	1007.34	0.19822	4185.94	29.1214	703.746	0.697039	1962.15	0	1818.89	1810.93	2.12711	0	1.52926
1371	16452	43452	12.07	4.57	13.57	32.9423	54.5632	21.8859	24.0683	1.08067	997.248	1007.34	0.19822	4185.93	29.1242	703.733	0.696992	1961.99	0	1818.78	1810.82	2.12698	0	1.52926
1372	16464	43464	12.0733	4.57333	13.5733	32.9508	54.5704	21.8962	24.0785	1.08065	997.245	1007.34	0.19822	4185.92	29.1269	703.72	0.696945	1961.82	0	1818.66	1810.71	2.12684	0	1.52926
1373	16476	43476	12.0767	4.57667	13.5767	32.9594	54.5776	21.9065	24.0886	1.08062	997.242	1007.34	0.19822	4185.92	29.1296	703.706	0.696898	1961.65	0	1818.54	1810.59	2.12671	0	1.52926
1374	16488	43488	12.08	4.58	13.58	32.9679	54.5847	21.9168	24.0988	1.0806	997.239	1007.34	0.19822	4185.91	29.1323	703.691	0.696852	1961.47	0	1818.43	1810.48	2.12657	0	1.52926
1375	16500	43500	12.0833	4.58333	13.5833	32.9765	54.5918	21.9271	24.109	1.08058	997.236	1007.34	0.19822	4185.9	29.135	703.675	0.696805	1961.3	0	1818.31	1810.36	2.12643	0	1.52926
1376	16512	43512	12.0867	4.58667	13.5867	32.985	54.5989	21.9375	24.1192	1.08055	997.233	1007.34	0.19822	4185.9	29.1377	703.659	0.696758	1961.12	0	1818.19	1810.24	2.12629	0	1.52926
1377	16524	43524	12.09	4.59	13.59	32.9935	54.6059	21.9478	24.1294	1.08053	997.23	1007.34	0.19822	4185.89	29.1404	703.642	0.696712	1960.94	0	1818.06	1810.12	2.12614	0	1.52926
1378	16536	43536	12.0933	4.59333	13.5933	33.002	54.6129	21.9581	24.1395	1.08051	997.227	1007.34	0.19822	4185.88	29.1431	703.625	0.696665	1960.76	0	1817.94	1810	2.126	0	1.52926
1379	16548	43548	12.0967	4.59667	13.5967	33.0105	54.6199	21.9684	24.1497	1.08048	997.224	1007.34	0.19822	4185.88	29.1458	703.607	0.696619	1960.58	0	1817.81	1809.88	2.12585	0	1.52926
1380	16560	43560	12.1	4.6	13.6	33.019	54.6268	21.9787	24.1599	1.08046	997.221	1007.34	0.19822	4185.87	29.1485	703.588	0.696572	1960.4	0	1817.68	1809.75	2.1257	0	1.52926
1381	16572	43572	12.1033	4.60333	13.6033	33.0274	54.6337	21.9891	24.1701	1.08044	997.218	1007.34	0.19822	4185.86	29.1512	703.569	0.696525	1960.21	0	1817.55	1809.62	2.12554	0	1.52926
1382	16584	43584	12.1067	4.60667	13.6067	33.0359	54.6406	21.9994	24.1802	1.08042	997.215	1007.34	0.19822	4185.85	29.1538	703.549	0.696479	1960.03	0	1817.42	1809.5	2.12539	0	1.52926
1383	16596	43596	12.11	4.61	13.61	33.0443	54.6475	22.0097	24.1904	1.08039	997.212	1007.34	0.19822	4185.85	29.1565	703.528	0.696432	1959.84	0	1817.28	1809.36	2.12523	0	1.52926
1384	16608	43608	12.1133	4.61333	13.6133	33.0528	54.6543	22.02	24.2005	1.08037	997.209	1007.34	0.19822	4185.84	29.1592	703.507	0.696386	1959.65	0	1817.15	1809.23	2.12507	0	1.52926
1385	16620	43620	12.1167	4.61667	13.6167	33.0612	54.6611	22.0303	24.2107	1.08035	997.206	1007.34	0.19822	4185.83	29.1618	703.485	0.696339	1959.46	0	1817.01	1809.1	2.12491	0	1.52926
1386	16632	43632	12.12	4.62	13.62	33.0696	54.6678	22.0406	24.2208	1.08033	997.203	1007.34	0.19822	4185.83	29.1645	703.462	0.696293	1959.26	0	1816.87	1808.96	2.12475	0	1.52926
1387	16644	43644	12.1233	4.62333	13.6233	33.078	54.6745	22.0509	24.231	1.0803	997.2	1007.34	0.19822	4185.82	29.1671	703.439	0.696246	1959.07	0	1816.73	1808.82	2.12459	0	1.52926
1388	16656	43656	12.1267	4.62667	13.6267	33.0864	54.6812	22.0612	24.2411	1.08028	997.197	1007.34	0.19822	4185.81	29.1698	703.416	0.6962	1958.87	0	1816.59	1808.68	2.12442	0	1.52926
1389	16668	43668	12.13	4.63	13.63	33.0948	54.6879	22.0716	24.2513	1.08026	997.194	1007.34	0.19822	4185.81	29.1724	703.391	0.696153	1958.67	0	1816.44	1808.54	2.12425	0	1.52926
1390	16680	43680	12.1333	4.63333	13.6333	33.1032	54.6945	22.0819	24.2614	1.08024	997.191	1007.34	0.19822	4185.8	29.175	703.366	0.696107	1958.47	0	1816.3	1808.4	2.12408	0	1.52926
1391	16692	43692	12.1367	4.63667	13.6367	33.1115	54.7011	22.0922	24.2716	1.08022	997.188	1007.34	0.19822	4185.79	29.1777	703.34	0.69606	1958.27	0	1816.15	1808.25	2.1239	0	1.52926
1392	16704	43704	12.14	4.64	13.64	33.1199	54.7076	22.1025	24.2817	1.08019	997.185	1007.34	0.19822	4185.78	29.1803	703.314	0.696014	1958.07	0	1816	1808.11	2.12373	0	1.52926
1393	16716	43716	12.1433	4.64333	13.6433	33.1282	54.7141	22.1128	24.2918	1.08017	997.182	1007.34	0.19822	4185.78	29.1829	703.287	0.695967	1957.86	0	1815.85	1807.96	2.12355	0	1.52926
1394	16728	43728	12.1467	4.64667	13.6467	33.1365	54.7206	22.1231	24.3019	1.08015	997.179	1007.34	0.19822	4185.77	29.1855	703.26	0.695921	1957.65	0	1815.69	1807.81	2.12337	0	1.52926
1395	16740	43740	12.15	4.65	13.65	33.1448	54.7271	22.1334	24.3121	1.08013	997.175	1007.35	0.19822	4185.76	29.1881	703.231	0.695875	1957.44	0	1815.54	1807.65	2.12319	0	1.52926
1396	16752	43752	12.1533	4.65333	13.6533	33.1531	54.7335	22.1437	24.3222	1.08011	997.172	1007.35	0.19822	4185.76	29.1907	703.203	0.695828	1957.23	0	1815.38	1807.5	2.12301	0	1.52926
1397	16764	43764	12.1567	4.65667	13.6567	33.1614	54.7399	22.154	24.3323	1.08009	997.169	1007.35	0.19822	4185.75	29.1933	703.173	0.695782	1957.02	0	1815.22	1807.34	2.12282	0	1.52926
1398	16776	43776	12.16	4.66	13.66	33.1697	54.7463	22.1643	24.3424	1.08007	997.166	1007.35	0.19822	4185.74	29.1959	703.143	0.695736	1956.81	0	1815.06	1807.19	2.12263	0	1.52926
1399	16788	43788	12.1633	4.66333	13.6633	33.178	54.7526	22.1746	24.3525	1.08004	997.163	1007.35	0.19822	4185.74	29.1985	703.112	0.695689	1956.59	0	1814.9	1807.03	2.12244	0	1.52926
1400	16800	43800	12.1667	4.66667	13.6667	33.1863	54.7589	22.1849	24.3626	1.08002	997.16	1007.35	0.19822	4185.73	29.201	703.081	0.695643	1956.37	0	1814.73	1806.87	2.12225	0	1.52926
1401	16812	43812	12.17	4.67	13.67	33.1945	54.7652	22.1952	24.3728	1.08	997.157	1007.35	0.19822	4185.72	29.2036	703.049	0.695597	1956.15	0	1814.57	1806.7	2.12206	0	1.52926
1402	16824	43824	12.1733	4.67333	13.6733	33.2027	54.7714	22.2055	24.3829	1.07998	997.154	1007.35	0.19822	4185.72	29.2062	703.016	0.69555	1955.93	0	1814.4	1806.54	2.12186	0	1.52926
1403	16836	43836	12.1767	4.67667	13.6767	33.211	54.7776	22.2158	24.393	1.07996	997.151	1007.35	0.19822	4185.71	29.2087	702.983	0.695504	1955.71	0	1814.23	1806.37	2.12166	0	1.52926
1404	16848	43848	12.18	4.68	13.68	33.2192	54.7838	22.2261	24.403	1.07994	997.148	1007.35	0.19822	4185.7	29.2113	702.949	0.695458	1955.49	0	1814.06	1806.2	2.12146	0	1.52926
1405	16860	43860	12.1833	4.68333	13.6833	33.2274	54.7899	22.2364	24.4131	1.07992	997.145	1007.35	0.19822	4185.69	29.2138	702.915	0.695411	1955.26	0	1813.88	1806.03	2.12126	0	1.52926
1406	16872	43872	12.1867	4.68667	13.6867	33.2356	54.796	22.2467	24.4232	1.0799	997.142	1007.35	0.19822	4185.69	29.2164	702.879	0.695365	1955.03	0	1813.71	1805.86	2.12105	0	1.52926
1407	16884	43884	12.19	4.69	13.69	33.2438	54.8021	22.257	24.4333	1.07988	997.139	1007.35	0.19822	4185.68	29.2189	702.844	0.695319	1954.8	0	1813.53	1805.69	2.12085	0	1.52926
1408	16896	43896	12.1933	4.69333	13.6933	33.252	54.8082	22.2673	24.4434	1.07986	997.136	1007.35	0.19822	4185.67	29.2214	702.807	0.695273	1954.57	0	1813.35	1805.51	2.12064	0	1.52926
1409	16908	43908	12.1967	4.69667	13.6967	33.2601	54.8142	22.2775	24.4535	1.07984	997.133	1007.35	0.19822	4185.67	29.224	702.77	0.695226	1954.34	0	1813.17	1805.34	2.12043	0	1.52926
1410	16920	43920	12.2	4.7	13.7	33.2683	54.8202	22.2878	24.4636	1.07982	997.13	1007.35	0.19822	4185.66	29.2265	702.732	0.69518	1954.1	0	1812.99	1805.16	2.12021	0	1.52926
1411	16932	43932	12.2033	4.70333	13.7033	33.2764	54.8261	22.2981	24.4736	1.0798	997.127	1007.35	0.19822	4185.65	29.229	702.694	0.695134	1953.87	0	1812.81	1804.98	2.12	0	1.52926
1412	16944	43944	12.2067	4.70667	13.7067	33.2845	54.832	22.3084	24.4837	1.07978	997.124	1007.35	0.19822	4185.65	29.2315	702.655	0.695088	1953.63	0	1812.62	1804.79	2.11978	0	1.52926
1413	16956	43956	12.21	4.71	13.71	33.2927	54.8379	22.3187	24.4938	1.07976	997.121	1007.35	0.19822	4185.64	29.234	702.616	0.695042	1953.39	0	1812.43	1804.61	2.11956	0	1.52926
1414	16968	43968	12.2133	4.71333	13.7133	33.3008	54.8438	22.329	24.5038	1.07974	997.118	1007.35	0.19822	4185.63	29.2365	702.575	0.694995	1953.15	0	1812.25	1804.42	2.11934	0	1.52926
1415	16980	43980	12.2167	4.71667	13.7167	33.3089	54.8496	22.3393	24.5139	1.07972	997.115	1007.35	0.19822	4185.63	29.239	702.534	0.694949	1952.9	0	1812.05	1804.24	2.11912	0	1.52926
1416	16992	43992	12.22	4.72	13.72	33.3169	54.8554	22.3495	24.524	1.0797	997.112	1007.35	0.19822	4185.62	29.2415	702.493	0.694903	1952.66	0	1811.86	1804.05	2.11889	0	1.52926
1417	17004	44004	12.2233	4.72333	13.7233	33.325	54.8611	22.3598	24.534	1.07968	997.109	1007.35	0.19822	4185.61	29.244	702.451	0.694857	1952.41	0	1811.67	1803.86	2.11866	0	1.52926
1418	17016	44016	12.2267	4.72667	13.7267	33.3331	54.8668	22.3701	24.5441	1.07967	997.106	1007.35	0.19822	4185.61	29.2465	702.408	0.694811	1952.16	0	1811.47	1803.66	2.11843	0	1.52926
1419	17028	44028	12.23	4.73	13.73	33.3411	54.8725	22.3804	24.5541	1.07965	997.103	1007.35	0.19822	4185.6	29.249	702.365	0.694765	1951.91	0	1811.27	1803.47	2.1182	0	1.52926
1420	17040	44040	12.2333	4.73333	13.7333	33.3492	54.8782	22.3907	24.5641	1.07963	997.1	1007.35	0.19822	4185.59	29.2514	702.321	0.694719	1951.66	0	1811.07	1803.27	2.11797	0	1.52926
1421	17052	44052	12.2367	4.73667	13.7367	33.3572	54.8838	22.4009	24.5742	1.07961	997.097	1007.35	0.19822	4185.58	29.2539	702.276	0.694672	1951.41	0	1810.87	1803.07	2.11773	0	1.52926
1422	17064	44064	12.24	4.74	13.74	33.3652	54.8894	22.4112	24.5842	1.07959	997.094	1007.35	0.19822	4185.58	29.2563	702.231	0.694626	1951.15	0	1810.67	1802.87	2.1175	0	1.52926
1423	17076	44076	12.2433	4.74333	13.7433	33.3732	54.895	22.4215	24.5943	1.07957	997.091	1007.35	0.19822	4185.57	29.2588	702.185	0.69458	1950.89	0	1810.46	1802.67	2.11726	0	1.52926
1424	17088	44088	12.2467	4.74667	13.7467	33.3812	54.9005	22.4318	24.6043	1.07955	997.088	1007.35	0.19822	4185.56	29.2612	702.138	0.694534	1950.64	0	1810.26	1802.47	2.11701	0	1.52926
1425	17100	44100	12.25	4.75	13.75	33.3892	54.906	22.442	24.6143	1.07954	997.085	1007.35	0.19822	4185.56	29.2637	702.091	0.694488	1950.38	0	1810.05	1802.26	2.11677	0	1.52926
1426	17112	44112	12.2533	4.75333	13.7533	33.3972	54.9115	22.4523	24.6243	1.07952	997.082	1007.36	0.19822	4185.55	29.2661	702.043	0.694442	1950.11	0	1809.84	1802.06	2.11652	0	1.52926
1427	17124	44124	12.2567	4.75667	13.7567	33.4051	54.9169	22.4626	24.6344	1.0795	997.079	1007.36	0.19822	4185.54	29.2686	701.995	0.694396	1949.85	0	1809.62	1801.85	2.11628	0	1.52926
1428	17136	44136	12.26	4.76	13.76	33.4131	54.9223	22.4728	24.6444	1.07948	997.076	1007.36	0.19822	4185.54	29.271	701.946	0.69435	1949.58	0	1809.41	1801.64	2.11602	0	1.52926
1429	17148	44148	12.2633	4.76333	13.7633	33.421	54.9277	22.4831	24.6544	1.07946	997.072	1007.36	0.19822	4185.53	29.2734	701.896	0.694304	1949.32	0	1809.19	1801.42	2.11577	0	1.52926
1430	17160	44160	12.2667	4.76667	13.7667	33.429	54.933	22.4934	24.6644	1.07945	997.069	1007.36	0.19822	4185.52	29.2758	701.846	0.694258	1949.05	0	1808.98	1801.21	2.11552	0	1.52926
1431	17172	44172	12.27	4.77	13.77	33.4369	54.9383	22.5036	24.6744	1.07943	997.066	1007.36	0.19822	4185.52	29.2782	701.795	0.694212	1948.78	0	1808.76	1800.99	2.11526	0	1.52926
1432	17184	44184	12.2733	4.77333	13.7733	33.4448	54.9436	22.5139	24.6844	1.07941	997.063	1007.36	0.19822	4185.51	29.2806	701.743	0.694166	1948.5	0	1808.54	1800.78	2.115	0	1.52926
1433	17196	44196	12.2767	4.77667	13.7767	33.4527	54.9488	22.5242	24.6944	1.07939	997.06	1007.36	0.19822	4185.5	29.283	701.691	0.69412	1948.23	0	1808.31	1800.56	2.11474	0	1.52926
1434	17208	44208	12.28	4.78	13.78	33.4606	54.954	22.5344	24.7044	1.07938	997.057	1007.36	0.19822	4185.5	29.2854	701.638	0.694074	1947.95	0	1808.09	1800.34	2.11448	0	1.52926
1435	17220	44220	12.2833	4.78333	13.7833	33.4685	54.9592	22.5447	24.7144	1.07936	997.054	1007.36	0.19822	4185.49	29.2878	701.584	0.694028	1947.68	0	1807.86	1800.11	2.11421	0	1.52926
1436	17232	44232	12.2867	4.78667	13.7867	33.4763	54.9644	22.5549	24.7244	1.07934	997.051	1007.36	0.19822	4185.48	29.2902	701.53	0.693982	1947.4	0	1807.63	1799.89	2.11395	0	1.52926
1437	17244	44244	12.29	4.79	13.79	33.4842	54.9695	22.5652	24.7344	1.07933	997.048	1007.36	0.19822	4185.48	29.2926	701.476	0.693936	1947.12	0	1807.4	1799.66	2.11368	0	1.52926
1438	17256	44256	12.2933	4.79333	13.7933	33.492	54.9745	22.5754	24.7444	1.07931	997.045	1007.36	0.19822	4185.47	29.2949	701.42	0.69389	1946.83	0	1807.17	1799.43	2.11341	0	1.52926
1439	17268	44268	12.2967	4.79667	13.7967	33.4998	54.9796	22.5857	24.7543	1.07929	997.042	1007.36	0.19822	4185.46	29.2973	701.364	0.693844	1946.55	0	1806.94	1799.2	2.11313	0	1.52926
1440	17280	44280	12.3	4.8	13.8	33.5077	54.9846	22.5959	24.7643	1.07928	997.039	1007.36	0.19822	4185.46	29.2997	701.307	0.693798	1946.26	0	1806.7	1798.97	2.11286	0	1.52926
1441	17292	44292	12.3033	4.80333	13.8033	33.5155	54.9896	22.6062	24.7743	1.07926	997.036	1007.36	0.19822	4185.45	29.302	701.25	0.693752	1945.98	0	1806.47	1798.74	2.11258	0	1.52926
1442	17304	44304	12.3067	4.80667	13.8067	33.5233	54.9945	22.6164	24.7843	1.07924	997.033	1007.36	0.19822	4185.44	29.3044	701.192	0.693706	1945.69	0	1806.23	1798.5	2.1123	0	1.52926
1443	17316	44316	12.31	4.81	13.81	33.531	54.9995	22.6267	24.7942	1.07923	997.03	1007.36	0.19822	4185.44	29.3067	701.134	0.69366	1945.39	0	1805.99	1798.27	2.11202	0	1.52926
1444	17328	44328	12.3133	4.81333	13.8133	33.5388	55.0043	22.6369	24.8042	1.07921	997.027	1007.36	0.19822	4185.43	29.3091	701.074	0.693614	1945.1	0	1805.74	1798.03	2.11174	0	1.52926
1445	17340	44340	12.3167	4.81667	13.8167	33.5466	55.0092	22.6472	24.8141	1.07919	997.024	1007.36	0.19822	4185.42	29.3114	701.015	0.693569	1944.81	0	1805.5	1797.79	2.11145	0	1.52926
1446	17352	44352	12.32	4.82	13.82	33.5543	55.014	22.6574	24.8241	1.07918	997.021	1007.36	0.19822	4185.42	29.3137	700.954	0.693523	1944.51	0	1805.25	1797.54	2.11116	0	1.52926
1447	17364	44364	12.3233	4.82333	13.8233	33.5621	55.0188	22.6677	24.8341	1.07916	997.018	1007.36	0.19822	4185.41	29.316	700.893	0.693477	1944.21	0	1805.01	1797.3	2.11087	0	1.52926
1448	17376	44376	12.3267	4.82667	13.8267	33.5698	55.0236	22.6779	24.844	1.07915	997.015	1007.36	0.19822	4185.4	29.3184	700.831	0.693431	1943.91	0	1804.76	1797.05	2.11058	0	1.52926
1449	17388	44388	12.33	4.83	13.83	33.5775	55.0283	22.6881	24.8539	1.07913	997.012	1007.36	0.19822	4185.4	29.3207	700.769	0.693385	1943.61	0	1804.5	1796.81	2.11029	0	1.52926
1450	17400	44400	12.3333	4.83333	13.8333	33.5852	55.033	22.6984	24.8639	1.07912	997.009	1007.36	0.19822	4185.39	29.323	700.706	0.693339	1943.31	0	1804.25	1796.56	2.10999	0	1.52926
1451	17412	44412	12.3367	4.83667	13.8367	33.5929	55.0376	22.7086	24.8738	1.0791	997.006	1007.36	0.19822	4185.38	29.3253	700.642	0.693293	1943	0	1804	1796.31	2.10969	0	1.52926
1452	17424	44424	12.34	4.84	13.84	33.6006	55.0423	22.7189	24.8838	1.07909	997.003	1007.36	0.19822	4185.38	29.3276	700.578	0.693248	1942.7	0	1803.74	1796.05	2.10939	0	1.52926
1453	17436	44436	12.3433	4.84333	13.8433	33.6083	55.0469	22.7291	24.8937	1.07907	997	1007.36	0.19822	4185.37	29.3299	700.513	0.693202	1942.39	0	1803.48	1795.8	2.10909	0	1.52926
1454	17448	44448	12.3467	4.84667	13.8467	33.6159	55.0514	22.7393	24.9036	1.07905	996.997	1007.36	0.19822	4185.36	29.3321	700.448	0.693156	1942.08	0	1803.22	1795.54	2.10879	0	1.52926
1455	17460	44460	12.35	4.85	13.85	33.6236	55.056	22.7495	24.9135	1.07904	996.994	1007.36	0.19822	4185.36	29.3344	700.382	0.69311	1941.77	0	1802.96	1795.28	2.10848	0	1.52926
1456	17472	44472	12.3533	4.85333	13.8533	33.6312	55.0605	22.7598	24.9234	1.07902	996.991	1007.36	0.19822	4185.35	29.3367	700.315	0.693064	1941.45	0	1802.7	1795.02	2.10817	0	1.52926
1457	17484	44484	12.3567	4.85667	13.8567	33.6389	55.0649	22.77	24.9334	1.07901	996.988	1007.36	0.19822	4185.34	29.339	700.248	0.693018	1941.14	0	1802.43	1794.76	2.10786	0	1.52926
1458	17496	44496	12.36	4.86	13.86	33.6465	55.0694	22.7802	24.9433	1.079	996.984	1007.36	0.19822	4185.34	29.3412	700.18	0.692973	1940.82	0	1802.16	1794.5	2.10755	0	1.52926
1459	17508	44508	12.3633	4.86333	13.8633	33.6541	55.0738	22.7905	24.9532	1.07898	996.981	1007.36	0.19822	4185.33	29.3435	700.111	0.692927	1940.5	0	1801.89	1794.23	2.10724	0	1.52926
1460	17520	44520	12.3667	4.86667	13.8667	33.6617	55.0781	22.8007	24.9631	1.07897	996.978	1007.36	0.19822	4185.32	29.3457	700.042	0.692881	1940.18	0	1801.62	1793.97	2.10692	0	1.52926
1461	17532	44532	12.37	4.87	13.87	33.6693	55.0825	22.8109	24.973	1.07895	996.975	1007.36	0.19822	4185.32	29.348	699.972	0.692835	1939.86	0	1801.35	1793.7	2.1066	0	1.52926
1462	17544	44544	12.3733	4.87333	13.8733	33.6768	55.0868	22.8211	24.9829	1.07894	996.972	1007.36	0.19822	4185.31	29.3502	699.901	0.692789	1939.54	0	1801.08	1793.43	2.10628	0	1.52926
1463	17556	44556	12.3767	4.87667	13.8767	33.6844	55.0911	22.8313	24.9928	1.07892	996.969	1007.36	0.19822	4185.3	29.3525	699.83	0.692744	1939.21	0	1800.8	1793.15	2.10596	0	1.52926
1464	17568	44568	12.38	4.88	13.88	33.6919	55.0953	22.8415	25.0027	1.07891	996.966	1007.37	0.19822	4185.3	29.3547	699.758	0.692698	1938.88	0	1800.52	1792.88	2.10563	0	1.52926
1465	17580	44580	12.3833	4.88333	13.8833	33.6995	55.0995	22.8518	25.0125	1.0789	996.963	1007.37	0.19822	4185.29	29.3569	699.686	0.692652	1938.56	0	1800.24	1792.6	2.1053	0	1.52926
1466	17592	44592	12.3867	4.88667	13.8867	33.707	55.1037	22.862	25.0224	1.07888	996.96	1007.37	0.19822	4185.28	29.3591	699.613	0.692606	1938.22	0	1799.96	1792.33	2.10498	0	1.52926
1467	17604	44604	12.39	4.89	13.89	33.7145	55.1078	22.8722	25.0323	1.07887	996.957	1007.37	0.19822	4185.28	29.3614	699.539	0.692561	1937.89	0	1799.68	1792.05	2.10464	0	1.52926
1468	17616	44616	12.3933	4.89333	13.8933	33.722	55.1119	22.8824	25.0422	1.07885	996.954	1007.37	0.19822	4185.27	29.3636	699.465	0.692515	1937.56	0	1799.39	1791.77	2.10431	0	1.52926
1469	17628	44628	12.3967	4.89667	13.8967	33.7295	55.116	22.8926	25.052	1.07884	996.951	1007.37	0.19822	4185.26	29.3658	699.39	0.692469	1937.22	0	1799.11	1791.48	2.10398	0	1.52926
1470	17640	44640	12.4	4.9	13.9	33.737	55.1201	22.9028	25.0619	1.07883	996.948	1007.37	0.19822	4185.26	29.368	699.314	0.692423	1936.89	0	1798.82	1791.2	2.10364	0	1.52926
1471	17652	44652	12.4033	4.90333	13.9033	33.7445	55.1241	22.913	25.0718	1.07881	996.945	1007.37	0.19822	4185.25	29.3702	699.238	0.692378	1936.55	0	1798.53	1790.91	2.1033	0	1.52926
1472	17664	44664	12.4067	4.90667	13.9067	33.7519	55.1281	22.9232	25.0816	1.0788	996.942	1007.37	0.19822	4185.24	29.3723	699.161	0.692332	1936.21	0	1798.24	1790.62	2.10296	0	1.52926
1473	17676	44676	12.41	4.91	13.91	33.7594	55.132	22.9334	25.0915	1.07879	996.939	1007.37	0.19822	4185.24	29.3745	699.084	0.692286	1935.86	0	1797.94	1790.33	2.10261	0	1.52926
1474	17688	44688	12.4133	4.91333	13.9133	33.7668	55.1359	22.9436	25.1013	1.07878	996.936	1007.37	0.19822	4185.23	29.3767	699.006	0.692241	1935.52	0	1797.65	1790.04	2.10227	0	1.52926
1475	17700	44700	12.4167	4.91667	13.9167	33.7742	55.1398	22.9538	25.1112	1.07876	996.933	1007.37	0.19822	4185.22	29.3789	698.927	0.692195	1935.17	0	1797.35	1789.75	2.10192	0	1.52926
1476	17712	44712	12.42	4.92	13.92	33.7816	55.1437	22.964	25.121	1.07875	996.93	1007.37	0.19822	4185.22	29.381	698.847	0.692149	1934.83	0	1797.05	1789.45	2.10157	0	1.52926
1477	17724	44724	12.4233	4.92333	13.9233	33.789	55.1475	22.9742	25.1309	1.07874	996.927	1007.37	0.19822	4185.21	29.3832	698.767	0.692103	1934.48	0	1796.75	1789.16	2.10122	0	1.52926
1478	17736	44736	12.4267	4.92667	13.9267	33.7964	55.1513	22.9844	25.1407	1.07872	996.924	1007.37	0.19822	4185.2	29.3853	698.687	0.692058	1934.13	0	1796.45	1788.86	2.10087	0	1.52926
1479	17748	44748	12.43	4.93	13.93	33.8038	55.155	22.9946	25.1505	1.07871	996.921	1007.37	0.19822	4185.2	29.3875	698.606	0.692012	1933.77	0	1796.14	1788.56	2.10051	0	1.52926
1480	17760	44760	12.4333	4.93333	13.9333	33.8112	55.1588	23.0048	25.1604	1.0787	996.918	1007.37	0.19822	4185.19	29.3896	698.524	0.691966	1933.42	0	1795.84	1788.26	2.10015	0	1.52926
1481	17772	44772	12.4367	4.93667	13.9367	33.8185	55.1625	23.0149	25.1702	1.07869	996.915	1007.37	0.19822	4185.18	29.3918	698.441	0.691921	1933.06	0	1795.53	1787.95	2.09979	0	1.52926
1482	17784	44784	12.44	4.94	13.94	33.8259	55.1661	23.0251	25.18	1.07868	996.912	1007.37	0.19822	4185.18	29.3939	698.358	0.691875	1932.71	0	1795.22	1787.65	2.09943	0	1.52926
1483	17796	44796	12.4433	4.94333	13.9433	33.8332	55.1698	23.0353	25.1898	1.07866	996.909	1007.37	0.19822	4185.17	29.396	698.274	0.691829	1932.35	0	1794.91	1787.34	2.09907	0	1.52926
1484	17808	44808	12.4467	4.94667	13.9467	33.8405	55.1733	23.0455	25.1996	1.07865	996.906	1007.37	0.19822	4185.16	29.3982	698.19	0.691784	1931.99	0	1794.6	1787.03	2.0987	0	1.52926
1485	17820	44820	12.45	4.95	13.95	33.8478	55.1769	23.0557	25.2094	1.07864	996.902	1007.37	0.19822	4185.16	29.4003	698.105	0.691738	1931.62	0	1794.28	1786.72	2.09833	0	1.52926
1486	17832	44832	12.4533	4.95333	13.9533	33.8551	55.1804	23.0658	25.2192	1.07863	996.899	1007.37	0.19822	4185.15	29.4024	698.019	0.691692	1931.26	0	1793.96	1786.41	2.09796	0	1.52926
1487	17844	44844	12.4567	4.95667	13.9567	33.8624	55.1839	23.076	25.229	1.07862	996.896	1007.37	0.19822	4185.14	29.4045	697.933	0.691647	1930.89	0	1793.65	1786.09	2.09759	0	1.52926
1488	17856	44856	12.46	4.96	13.96	33.8697	55.1874	23.0862	25.2388	1.0786	996.893	1007.37	0.19822	4185.14	29.4066	697.846	0.691601	1930.52	0	1793.33	1785.77	2.09721	0	1.52926
1489	17868	44868	12.4633	4.96333	13.9633	33.877	55.1908	23.0964	25.2486	1.07859	996.89	1007.37	0.19822	4185.13	29.4087	697.759	0.691555	1930.16	0	1793	1785.46	2.09684	0	1.52926
1490	17880	44880	12.4667	4.96667	13.9667	33.8842	55.1942	23.1065	25.2584	1.07858	996.887	1007.37	0.19822	4185.12	29.4108	697.671	0.69151	1929.78	0	1792.68	1785.14	2.09646	0	1.52926
1491	17892	44892	12.47	4.97	13.97	33.8915	55.1976	23.1167	25.2682	1.07857	996.884	1007.37	0.19822	4185.12	29.4129	697.582	0.691464	1929.41	0	1792.35	1784.82	2.09608	0	1.52926
1492	17904	44904	12.4733	4.97333	13.9733	33.8987	55.201	23.1269	25.278	1.07856	996.881	1007.37	0.19822	4185.11	29.4149	697.492	0.691419	1929.04	0	1792.03	1784.49	2.0957	0	1.52926
1493	17916	44916	12.4767	4.97667	13.9767	33.9059	55.2043	23.137	25.2877	1.07855	996.878	1007.37	0.19822	4185.11	29.417	697.402	0.691373	1928.66	0	1791.7	1784.17	2.09531	0	1.52926
1494	17928	44928	12.48	4.98	13.98	33.9131	55.2075	23.1472	25.2975	1.07854	996.875	1007.37	0.19822	4185.1	29.4191	697.312	0.691327	1928.28	0	1791.37	1783.84	2.09493	0	1.52926
1495	17940	44940	12.4833	4.98333	13.9833	33.9203	55.2108	23.1574	25.3073	1.07853	996.872	1007.37	0.19822	4185.09	29.4211	697.22	0.691282	1927.9	0	1791.04	1783.51	2.09454	0	1.52926
1496	17952	44952	12.4867	4.98667	13.9867	33.9275	55.214	23.1675	25.317	1.07852	996.869	1007.37	0.19822	4185.09	29.4232	697.128	0.691236	1927.52	0	1790.7	1783.18	2.09415	0	1.52926
1497	17964	44964	12.49	4.99	13.99	33.9347	55.2172	23.1777	25.3268	1.07851	996.866	1007.37	0.19822	4185.08	29.4252	697.036	0.69119	1927.14	0	1790.37	1782.85	2.09375	0	1.52926
1498	17976	44976	12.4933	4.99333	13.9933	33.9418	55.2203	23.1878	25.3366	1.0785	996.863	1007.37	0.19822	4185.07	29.4273	696.943	0.691145	1926.75	0	1790.03	1782.52	2.09336	0	1.52926
1499	17988	44988	12.4967	4.99667	13.9967	33.949	55.2234	23.198	25.3463	1.07849	996.86	1007.37	0.19822	4185.07	29.4293	696.849	0.691099	1926.37	0	1789.69	1782.18	2.09296	0	1.52926
1500	18000	45000	12.5	5	14	33.9561	55.2265	23.2081	25.3561	1.07848	996.857	1007.37	0.19822	4185.06	29.4313	696.754	0.691054	1925.98	0	1789.35	1781.84	2.09256	0	1.52926
1501	18012	45012	12.5033	5.00333	14.0033	33.9633	55.2295	23.2183	25.3658	1.07847	996.854	1007.37	0.19822	4185.05	29.4334	696.659	0.691008	1925.59	0	1789	1781.51	2.09216	0	1.52926
1502	18024	45024	12.5067	5.00667	14.0067	33.9704	55.2326	23.2284	25.3755	1.07846	996.851	1007.37	0.19822	4185.05	29.4354	696.564	0.690962	1925.2	0	1788.66	1781.16	2.09176	0	1.52926
1503	18036	45036	12.51	5.01	14.01	33.9775	55.2355	23.2386	25.3853	1.07845	996.848	1007.37	0.19822	4185.04	29.4374	696.467	0.690917	1924.8	0	1788.31	1780.82	2.09135	0	1.52926
1504	18048	45048	12.5133	5.01333	14.0133	33.9846	55.2385	23.2487	25.395	1.07844	996.845	1007.37	0.19822	4185.03	29.4394	696.371	0.690871	1924.41	0	1787.96	1780.48	2.09094	0	1.52926
1505	18060	45060	12.5167	5.01667	14.0167	33.9917	55.2414	23.2588	25.4047	1.07843	996.842	1007.37	0.19822	4185.03	29.4414	696.273	0.690826	1924.01	0	1787.61	1780.13	2.09054	0	1.52926
1506	18072	45072	12.52	5.02	14.02	33.9987	55.2443	23.269	25.4144	1.07842	996.839	1007.37	0.19822	4185.02	29.4434	696.175	0.69078	1923.61	0	1787.26	1779.78	2.09012	0	1.52926
1507	18084	45084	12.5233	5.02333	14.0233	34.0058	55.2471	23.2791	25.4242	1.07841	996.836	1007.37	0.19822	4185.02	29.4454	696.076	0.690734	1923.21	0	1786.91	1779.44	2.08971	0	1.52926
1508	18096	45096	12.5267	5.02667	14.0267	34.0128	55.25	23.2892	25.4339	1.0784	996.833	1007.37	0.19822	4185.01	29.4474	695.977	0.690689	1922.81	0	1786.55	1779.08	2.08929	0	1.52926
1509	18108	45108	12.53	5.03	14.03	34.0199	55.2528	23.2994	25.4436	1.07839	996.83	1007.37	0.19822	4185	29.4494	695.876	0.690643	1922.41	0	1786.2	1778.73	2.08888	0	1.52926
1510	18120	45120	12.5333	5.03333	14.0333	34.0269	55.2555	23.3095	25.4533	1.07838	996.827	1007.37	0.19822	4185	29.4514	695.776	0.690598	1922	0	1785.84	1778.38	2.08846	0	1.52926
1511	18132	45132	12.5367	5.03667	14.0367	34.0339	55.2582	23.3196	25.463	1.07837	996.824	1007.37	0.19822	4184.99	29.4533	695.674	0.690552	1921.6	0	1785.48	1778.02	2.08804	0	1.52926
1512	18144	45144	12.54	5.04	14.04	34.0409	55.2609	23.3298	25.4727	1.07836	996.821	1007.37	0.19822	4184.98	29.4553	695.573	0.690506	1921.19	0	1785.11	1777.66	2.08761	0	1.52926
1513	18156	45156	12.5433	5.04333	14.0433	34.0479	55.2636	23.3399	25.4824	1.07835	996.817	1007.37	0.19822	4184.98	29.4573	695.47	0.690461	1920.78	0	1784.75	1777.3	2.08719	0	1.52926
1514	18168	45168	12.5467	5.04667	14.0467	34.0549	55.2662	23.35	25.4921	1.07834	996.814	1007.37	0.19822	4184.97	29.4592	695.367	0.690415	1920.37	0	1784.39	1776.94	2.08676	0	1.52926
1515	18180	45180	12.55	5.05	14.05	34.0619	55.2688	23.3601	25.5018	1.07834	996.811	1007.37	0.19822	4184.96	29.4612	695.263	0.69037	1919.95	0	1784.02	1776.58	2.08633	0	1.52926
1516	18192	45192	12.5533	5.05333	14.0533	34.0688	55.2714	23.3702	25.5114	1.07833	996.808	1007.37	0.19822	4184.96	29.4631	695.158	0.690324	1919.54	0	1783.65	1776.21	2.0859	0	1.52926
1517	18204	45204	12.5567	5.05667	14.0567	34.0757	55.2739	23.3803	25.5211	1.07832	996.805	1007.37	0.19822	4184.95	29.4651	695.053	0.690279	1919.12	0	1783.28	1775.85	2.08546	0	1.52926
1518	18216	45216	12.56	5.06	14.06	34.0827	55.2764	23.3905	25.5308	1.07831	996.802	1007.37	0.19822	4184.94	29.467	694.948	0.690233	1918.7	0	1782.9	1775.48	2.08503	0	1.52926
1519	18228	45228	12.5633	5.06333	14.0633	34.0896	55.2789	23.4006	25.5404	1.0783	996.799	1007.38	0.19822	4184.94	29.4689	694.841	0.690187	1918.28	0	1782.53	1775.11	2.08459	0	1.52926
1520	18240	45240	12.5667	5.06667	14.0667	34.0965	55.2813	23.4107	25.5501	1.07829	996.796	1007.38	0.19822	4184.93	29.4708	694.734	0.690142	1917.86	0	1782.15	1774.73	2.08415	0	1.52926
1521	18252	45252	12.57	5.07	14.07	34.1034	55.2837	23.4208	25.5598	1.07829	996.793	1007.38	0.19822	4184.93	29.4728	694.627	0.690096	1917.44	0	1781.78	1774.36	2.08371	0	1.52926
1522	18264	45264	12.5733	5.07333	14.0733	34.1103	55.2861	23.4309	25.5694	1.07828	996.79	1007.38	0.19822	4184.92	29.4747	694.519	0.690051	1917.01	0	1781.4	1773.99	2.08326	0	1.52926
1523	18276	45276	12.5767	5.07667	14.0767	34.1172	55.2884	23.441	25.5791	1.07827	996.787	1007.38	0.19822	4184.91	29.4766	694.41	0.690005	1916.59	0	1781.01	1773.61	2.08282	0	1.52926
1524	18288	45288	12.58	5.08	14.08	34.124	55.2907	23.4511	25.5887	1.07826	996.784	1007.38	0.19822	4184.91	29.4785	694.3	0.68996	1916.16	0	1780.63	1773.23	2.08237	0	1.52926
1525	18300	45300	12.5833	5.08333	14.0833	34.1309	55.293	23.4612	25.5984	1.07826	996.781	1007.38	0.19822	4184.9	29.4804	694.19	0.689914	1915.73	0	1780.25	1772.85	2.08192	0	1.52926
1526	18312	45312	12.5867	5.08667	14.0867	34.1377	55.2952	23.4713	25.608	1.07825	996.778	1007.38	0.19822	4184.89	29.4823	694.08	0.689868	1915.29	0	1779.86	1772.47	2.08147	0	1.52926
1527	18324	45324	12.59	5.09	14.09	34.1446	55.2974	23.4814	25.6176	1.07824	996.775	1007.38	0.19822	4184.89	29.4841	693.968	0.689823	1914.86	0	1779.47	1772.08	2.08101	0	1.52926
1528	18336	45336	12.5933	5.09333	14.0933	34.1514	55.2996	23.4915	25.6273	1.07823	996.772	1007.38	0.19822	4184.88	29.486	693.856	0.689777	1914.43	0	1779.08	1771.7	2.08056	0	1.52926
1529	18348	45348	12.5967	5.09667	14.0967	34.1582	55.3017	23.5015	25.6369	1.07823	996.769	1007.38	0.19822	4184.87	29.4879	693.744	0.689732	1913.99	0	1778.69	1771.31	2.0801	0	1.52926
1530	18360	45360	12.6	5.1	14.1	34.165	55.3039	23.5116	25.6465	1.07822	996.766	1007.38	0.19822	4184.87	29.4898	693.631	0.689686	1913.55	0	1778.29	1770.92	2.07964	0	1.52926
1531	18372	45372	12.6033	5.10333	14.1033	34.1717	55.3059	23.5217	25.6561	1.07821	996.763	1007.38	0.19822	4184.86	29.4916	693.517	0.689641	1913.11	0	1777.9	1770.53	2.07917	0	1.52926
1532	18384	45384	12.6067	5.10667	14.1067	34.1785	55.308	23.5318	25.6657	1.07821	996.76	1007.38	0.19822	4184.86	29.4935	693.402	0.689595	1912.67	0	1777.5	1770.13	2.07871	0	1.52926
1533	18396	45396	12.61	5.11	14.11	34.1853	55.31	23.5419	25.6753	1.0782	996.757	1007.38	0.19822	4184.85	29.4953	693.287	0.689549	1912.22	0	1777.1	1769.74	2.07824	0	1.52926
1534	18408	45408	12.6133	5.11333	14.1133	34.192	55.312	23.552	25.6849	1.07819	996.754	1007.38	0.19822	4184.84	29.4972	693.172	0.689504	1911.78	0	1776.7	1769.34	2.07777	0	1.52926
1535	18420	45420	12.6167	5.11667	14.1167	34.1988	55.3139	23.562	25.6945	1.07819	996.751	1007.38	0.19822	4184.84	29.499	693.055	0.689458	1911.33	0	1776.3	1768.95	2.0773	0	1.52926
1536	18432	45432	12.62	5.12	14.12	34.2055	55.3158	23.5721	25.7041	1.07818	996.748	1007.38	0.19822	4184.83	29.5008	692.938	0.689413	1910.88	0	1775.9	1768.55	2.07683	0	1.52926
1537	18444	45444	12.6233	5.12333	14.1233	34.2122	55.3177	23.5822	25.7137	1.07817	996.745	1007.38	0.19822	4184.82	29.5027	692.821	0.689367	1910.43	0	1775.49	1768.14	2.07636	0	1.52926
1538	18456	45456	12.6267	5.12667	14.1267	34.2189	55.3196	23.5922	25.7233	1.07817	996.742	1007.38	0.19822	4184.82	29.5045	692.703	0.689321	1909.98	0	1775.08	1767.74	2.07588	0	1.52926
1539	18468	45468	12.63	5.13	14.13	34.2256	55.3214	23.6023	25.7329	1.07816	996.739	1007.38	0.19822	4184.81	29.5063	692.584	0.689276	1909.53	0	1774.67	1767.34	2.0754	0	1.52926
1540	18480	45480	12.6333	5.13333	14.1333	34.2323	55.3232	23.6124	25.7424	1.07816	996.736	1007.38	0.19822	4184.81	29.5081	692.464	0.68923	1909.07	0	1774.26	1766.93	2.07492	0	1.52926
1541	18492	45492	12.6367	5.13667	14.1367	34.2389	55.3249	23.6224	25.752	1.07815	996.733	1007.38	0.19822	4184.8	29.5099	692.344	0.689185	1908.61	0	1773.85	1766.52	2.07444	0	1.52926
1542	18504	45504	12.64	5.14	14.14	34.2456	55.3267	23.6325	25.7616	1.07814	996.73	1007.38	0.19822	4184.79	29.5117	692.224	0.689139	1908.15	0	1773.43	1766.11	2.07395	0	1.52926
1543	18516	45516	12.6433	5.14333	14.1433	34.2522	55.3284	23.6425	25.7711	1.07814	996.726	1007.38	0.19822	4184.79	29.5135	692.102	0.689094	1907.69	0	1773.02	1765.7	2.07347	0	1.52926
1544	18528	45528	12.6467	5.14667	14.1467	34.2589	55.33	23.6526	25.7807	1.07813	996.723	1007.38	0.19822	4184.78	29.5153	691.981	0.689048	1907.23	0	1772.6	1765.29	2.07298	0	1.52926
1545	18540	45540	12.65	5.15	14.15	34.2655	55.3316	23.6626	25.7902	1.07813	996.72	1007.38	0.19822	4184.77	29.5171	691.858	0.689002	1906.77	0	1772.18	1764.87	2.07249	0	1.52926
1546	18552	45552	12.6533	5.15333	14.1533	34.2721	55.3332	23.6727	25.7998	1.07812	996.717	1007.38	0.19822	4184.77	29.5189	691.735	0.688957	1906.3	0	1771.76	1764.45	2.07199	0	1.52926
1547	18564	45564	12.6567	5.15667	14.1567	34.2787	55.3348	23.6827	25.8093	1.07812	996.714	1007.38	0.19822	4184.76	29.5206	691.611	0.688911	1905.83	0	1771.34	1764.03	2.0715	0	1.52926
1548	18576	45576	12.66	5.16	14.16	34.2853	55.3363	23.6928	25.8189	1.07811	996.711	1007.38	0.19822	4184.76	29.5224	691.487	0.688866	1905.37	0	1770.91	1763.61	2.071	0	1.52926
1549	18588	45588	12.6633	5.16333	14.1633	34.2918	55.3378	23.7028	25.8284	1.07811	996.708	1007.38	0.19822	4184.75	29.5242	691.362	0.68882	1904.9	0	1770.48	1763.19	2.0705	0	1.52926
1550	18600	45600	12.6667	5.16667	14.1667	34.2984	55.3393	23.7128	25.8379	1.0781	996.705	1007.38	0.19822	4184.74	29.5259	691.236	0.688774	1904.42	0	1770.06	1762.77	2.07	0	1.52926
1551	18612	45612	12.67	5.17	14.17	34.3049	55.3407	23.7229	25.8475	1.0781	996.702	1007.38	0.19822	4184.74	29.5277	691.11	0.688729	1903.95	0	1769.62	1762.34	2.0695	0	1.52926
1552	18624	45624	12.6733	5.17333	14.1733	34.3115	55.3421	23.7329	25.857	1.07809	996.699	1007.38	0.19822	4184.73	29.5294	690.983	0.688683	1903.47	0	1769.19	1761.91	2.06899	0	1.52926
1553	18636	45636	12.6767	5.17667	14.1767	34.318	55.3435	23.7429	25.8665	1.07809	996.696	1007.38	0.19822	4184.72	29.5312	690.855	0.688638	1903	0	1768.76	1761.49	2.06849	0	1.52926
1554	18648	45648	12.68	5.18	14.18	34.3245	55.3448	23.753	25.876	1.07808	996.693	1007.38	0.19822	4184.72	29.5329	690.727	0.688592	1902.52	0	1768.32	1761.05	2.06798	0	1.52926
1555	18660	45660	12.6833	5.18333	14.1833	34.331	55.3461	23.763	25.8855	1.07808	996.69	1007.38	0.19822	4184.71	29.5346	690.599	0.688546	1902.04	0	1767.89	1760.62	2.06747	0	1.52926
1556	18672	45672	12.6867	5.18667	14.1867	34.3375	55.3474	23.773	25.895	1.07808	996.687	1007.38	0.19822	4184.71	29.5363	690.469	0.688501	1901.55	0	1767.45	1760.19	2.06695	0	1.52926
1557	18684	45684	12.69	5.19	14.19	34.344	55.3486	23.783	25.9045	1.07807	996.684	1007.38	0.19822	4184.7	29.5381	690.339	0.688455	1901.07	0	1767.01	1759.75	2.06644	0	1.52926
1558	18696	45696	12.6933	5.19333	14.1933	34.3505	55.3499	23.793	25.914	1.07807	996.681	1007.38	0.19822	4184.69	29.5398	690.209	0.68841	1900.58	0	1766.56	1759.31	2.06592	0	1.52926
1559	18708	45708	12.6967	5.19667	14.1967	34.3569	55.351	23.8031	25.9235	1.07806	996.678	1007.38	0.19822	4184.69	29.5415	690.077	0.688364	1900.1	0	1766.12	1758.87	2.0654	0	1.52926
1560	18720	45720	12.7	5.2	14.2	34.3634	55.3522	23.8131	25.933	1.07806	996.675	1007.38	0.19822	4184.68	29.5432	689.945	0.688318	1899.61	0	1765.68	1758.43	2.06488	0	1.52926
1561	18732	45732	12.7033	5.20333	14.2033	34.3698	55.3533	23.8231	25.9425	1.07806	996.672	1007.38	0.19822	4184.68	29.5449	689.813	0.688273	1899.12	0	1765.23	1757.99	2.06436	0	1.52926
1562	18744	45744	12.7067	5.20667	14.2067	34.3762	55.3544	23.8331	25.9519	1.07805	996.669	1007.38	0.19822	4184.67	29.5466	689.68	0.688227	1898.63	0	1764.78	1757.55	2.06383	0	1.52926
1563	18756	45756	12.71	5.21	14.21	34.3826	55.3554	23.8431	25.9614	1.07805	996.666	1007.38	0.19822	4184.66	29.5482	689.546	0.688182	1898.13	0	1764.33	1757.1	2.0633	0	1.52926
1564	18768	45768	12.7133	5.21333	14.2133	34.389	55.3564	23.8531	25.9709	1.07805	996.663	1007.38	0.19822	4184.66	29.5499	689.412	0.688136	1897.64	0	1763.87	1756.65	2.06277	0	1.52926
1565	18780	45780	12.7167	5.21667	14.2167	34.3954	55.3574	23.8631	25.9803	1.07804	996.66	1007.38	0.19822	4184.65	29.5516	689.277	0.68809	1897.14	0	1763.42	1756.2	2.06224	0	1.52926
1566	18792	45792	12.72	5.22	14.22	34.4018	55.3584	23.8731	25.9898	1.07804	996.657	1007.38	0.19822	4184.64	29.5533	689.141	0.688045	1896.64	0	1762.96	1755.75	2.06171	0	1.52926
1567	18804	45804	12.7233	5.22333	14.2233	34.4081	55.3593	23.8831	25.9992	1.07804	996.654	1007.38	0.19822	4184.64	29.5549	689.005	0.687999	1896.14	0	1762.51	1755.3	2.06117	0	1.52926
1568	18816	45816	12.7267	5.22667	14.2267	34.4145	55.3602	23.8931	26.0087	1.07803	996.651	1007.38	0.19822	4184.63	29.5566	688.868	0.687953	1895.64	0	1762.05	1754.84	2.06064	0	1.52926
1569	18828	45828	12.73	5.23	14.23	34.4208	55.361	23.9031	26.0181	1.07803	996.648	1007.38	0.19822	4184.63	29.5582	688.731	0.687908	1895.13	0	1761.59	1754.38	2.0601	0	1.52926
1570	18840	45840	12.7333	5.23333	14.2333	34.4271	55.3618	23.913	26.0275	1.07803	996.645	1007.38	0.19822	4184.62	29.5599	688.593	0.687862	1894.63	0	1761.12	1753.93	2.05955	0	1.52926
1571	18852	45852	12.7367	5.23667	14.2367	34.4335	55.3626	23.923	26.037	1.07803	996.642	1007.38	0.19822	4184.61	29.5615	688.454	0.687816	1894.12	0	1760.66	1753.47	2.05901	0	1.52926
1572	18864	45864	12.74	5.24	14.24	34.4398	55.3634	23.933	26.0464	1.07802	996.639	1007.38	0.19822	4184.61	29.5631	688.315	0.687771	1893.61	0	1760.19	1753	2.05847	0	1.52926
1573	18876	45876	12.7433	5.24333	14.2433	34.4461	55.3641	23.943	26.0558	1.07802	996.636	1007.38	0.19822	4184.6	29.5648	688.175	0.687725	1893.1	0	1759.72	1752.54	2.05792	0	1.52926
1574	18888	45888	12.7467	5.24667	14.2467	34.4523	55.3648	23.953	26.0652	1.07802	996.633	1007.38	0.19822	4184.6	29.5664	688.035	0.687679	1892.59	0	1759.25	1752.08	2.05737	0	1.52926
1575	18900	45900	12.75	5.25	14.25	34.4586	55.3655	23.9629	26.0747	1.07802	996.63	1007.38	0.19822	4184.59	29.568	687.893	0.687634	1892.07	0	1758.78	1751.61	2.05682	0	1.52926
1576	18912	45912	12.7533	5.25333	14.2533	34.4649	55.3661	23.9729	26.0841	1.07801	996.627	1007.38	0.19822	4184.58	29.5696	687.752	0.687588	1891.56	0	1758.31	1751.14	2.05626	0	1.52926
1577	18924	45924	12.7567	5.25667	14.2567	34.4711	55.3667	23.9829	26.0935	1.07801	996.624	1007.38	0.19822	4184.58	29.5712	687.609	0.687542	1891.04	0	1757.83	1750.67	2.05571	0	1.52926
1578	18936	45936	12.76	5.26	14.26	34.4773	55.3672	23.9928	26.1029	1.07801	996.621	1007.38	0.19822	4184.57	29.5728	687.466	0.687497	1890.52	0	1757.36	1750.2	2.05515	0	1.52926
1579	18948	45948	12.7633	5.26333	14.2633	34.4836	55.3678	24.0028	26.1123	1.07801	996.618	1007.38	0.19822	4184.57	29.5744	687.323	0.687451	1890	0	1756.88	1749.72	2.05459	0	1.52926
1580	18960	45960	12.7667	5.26667	14.2667	34.4898	55.3683	24.0127	26.1216	1.07801	996.615	1007.38	0.19822	4184.56	29.576	687.178	0.687405	1889.48	0	1756.4	1749.25	2.05403	0	1.52926
1581	18972	45972	12.77	5.27	14.27	34.496	55.3687	24.0227	26.131	1.07801	996.612	1007.38	0.19822	4184.55	29.5776	687.034	0.68736	1888.96	0	1755.92	1748.77	2.05346	0	1.52926
1582	18984	45984	12.7733	5.27333	14.2733	34.5021	55.3692	24.0327	26.1404	1.078	996.608	1007.38	0.19822	4184.55	29.5791	686.888	0.687314	1888.43	0	1755.43	1748.29	2.0529	0	1.52926
1583	18996	45996	12.7767	5.27667	14.2767	34.5083	55.3696	24.0426	26.1498	1.078	996.605	1007.38	0.19822	4184.54	29.5807	686.742	0.687268	1887.9	0	1754.95	1747.81	2.05233	0	1.52926
1584	19008	46008	12.78	5.28	14.28	34.5145	55.3699	24.0526	26.1591	1.078	996.602	1007.38	0.19822	4184.54	29.5823	686.595	0.687222	1887.37	0	1754.46	1747.33	2.05176	0	1.52926
1585	19020	46020	12.7833	5.28333	14.2833	34.5206	55.3703	24.0625	26.1685	1.078	996.599	1007.38	0.19822	4184.53	29.5838	686.448	0.687177	1886.84	0	1753.97	1746.85	2.05119	0	1.52926
1586	19032	46032	12.7867	5.28667	14.2867	34.5268	55.3706	24.0724	26.1779	1.078	996.596	1007.38	0.19822	4184.52	29.5854	686.3	0.687131	1886.31	0	1753.48	1746.36	2.05062	0	1.52926
1587	19044	46044	12.79	5.29	14.29	34.5329	55.3709	24.0824	26.1872	1.078	996.593	1007.38	0.19822	4184.52	29.5869	686.152	0.687085	1885.78	0	1752.99	1745.87	2.05004	0	1.52926
1588	19056	46056	12.7933	5.29333	14.2933	34.539	55.3711	24.0923	26.1966	1.078	996.59	1007.38	0.19822	4184.51	29.5885	686.002	0.687039	1885.24	0	1752.49	1745.38	2.04946	0	1.52926
1589	19068	46068	12.7967	5.29667	14.2967	34.5451	55.3713	24.1022	26.2059	1.078	996.587	1007.38	0.19822	4184.5	29.59	685.853	0.686994	1884.71	0	1752	1744.89	2.04888	0	1.52926
1590	19080	46080	12.8	5.3	14.3	34.5512	55.3715	24.1122	26.2152	1.078	996.584	1007.38	0.19822	4184.5	29.5915	685.702	0.686948	1884.17	0	1751.5	1744.4	2.0483	0	1.52926
1591	19092	46092	12.8033	5.30333	14.3033	34.5573	55.3716	24.1221	26.2246	1.078	996.581	1007.38	0.19822	4184.49	29.5931	685.551	0.686902	1883.63	0	1751	1743.91	2.04772	0	1.52926
1592	19104	46104	12.8067	5.30667	14.3067	34.5633	55.3718	24.132	26.2339	1.078	996.578	1007.38	0.19822	4184.49	29.5946	685.4	0.686856	1883.08	0	1750.5	1743.41	2.04713	0	1.52926
1593	19116	46116	12.81	5.31	14.31	34.5694	55.3718	24.1419	26.2432	1.078	996.575	1007.38	0.19822	4184.48	29.5961	685.247	0.686811	1882.54	0	1750	1742.91	2.04655	0	1.52926
1594	19128	46128	12.8133	5.31333	14.3133	34.5754	55.3719	24.1519	26.2526	1.078	996.572	1007.38	0.19822	4184.47	29.5976	685.095	0.686765	1882	0	1749.49	1742.41	2.04596	0	1.52926
1595	19140	46140	12.8167	5.31667	14.3167	34.5815	55.3719	24.1618	26.2619	1.078	996.569	1007.38	0.19822	4184.47	29.5991	684.941	0.686719	1881.45	0	1748.99	1741.91	2.04536	0	1.52926
1596	19152	46152	12.82	5.32	14.32	34.5875	55.3719	24.1717	26.2712	1.078	996.566	1007.38	0.19822	4184.46	29.6006	684.787	0.686673	1880.9	0	1748.48	1741.41	2.04477	0	1.52926
1597	19164	46164	12.8233	5.32333	14.3233	34.5935	55.3718	24.1816	26.2805	1.078	996.563	1007.38	0.19822	4184.46	29.6021	684.632	0.686627	1880.35	0	1747.97	1740.9	2.04417	0	1.52926
1598	19176	46176	12.8267	5.32667	14.3267	34.5995	55.3718	24.1915	26.2898	1.078	996.56	1007.38	0.19822	4184.45	29.6036	684.477	0.686582	1879.8	0	1747.46	1740.4	2.04358	0	1.52926
1599	19188	46188	12.83	5.33	14.33	34.6055	55.3717	24.2014	26.2991	1.078	996.557	1007.38	0.19822	4184.45	29.6051	684.321	0.686536	1879.24	0	1746.95	1739.89	2.04298	0	1.52926
1600	19200	46200	12.8333	5.33333	14.3333	34.6114	55.3715	24.2113	26.3084	1.078	996.554	1007.38	0.19822	4184.44	29.6065	684.164	0.68649	1878.69	0	1746.43	1739.38	2.04238	0	1.52926
1601	19212	46212	12.8367	5.33667	14.3367	34.6174	55.3713	24.2212	26.3176	1.078	996.551	1007.38	0.19822	4184.43	29.608	684.007	0.686444	1878.13	0	1745.92	1738.87	2.04177	0	1.52926
1602	19224	46224	12.84	5.34	14.34	34.6234	55.3711	24.2311	26.3269	1.078	996.548	1007.38	0.19822	4184.43	29.6095	683.85	0.686398	1877.57	0	1745.4	1738.36	2.04117	0	1.52926
1603	19236	46236	12.8433	5.34333	14.3433	34.6293	55.3709	24.241	26.3362	1.078	996.545	1007.38	0.19822	4184.42	29.6109	683.691	0.686353	1877.01	0	1744.88	1737.84	2.04056	0	1.52926
1604	19248	46248	12.8467	5.34667	14.3467	34.6352	55.3706	24.2509	26.3455	1.078	996.542	1007.38	0.19822	4184.42	29.6124	683.532	0.686307	1876.45	0	1744.36	1737.33	2.03995	0	1.52926
1605	19260	46260	12.85	5.35	14.35	34.6411	55.3703	24.2608	26.3547	1.078	996.539	1007.38	0.19822	4184.41	29.6138	683.373	0.686261	1875.89	0	1743.83	1736.81	2.03934	0	1.52926
1606	19272	46272	12.8533	5.35333	14.3533	34.647	55.37	24.2706	26.364	1.078	996.536	1007.38	0.19822	4184.4	29.6153	683.212	0.686215	1875.32	0	1743.31	1736.29	2.03872	0	1.52926
1607	19284	46284	12.8567	5.35667	14.3567	34.6529	55.3696	24.2805	26.3732	1.078	996.533	1007.38	0.19822	4184.4	29.6167	683.051	0.686169	1874.76	0	1742.78	1735.77	2.03811	0	1.52926
1608	19296	46296	12.86	5.36	14.36	34.6588	55.3692	24.2904	26.3825	1.078	996.53	1007.38	0.19822	4184.39	29.6181	682.89	0.686123	1874.19	0	1742.26	1735.24	2.03749	0	1.52926
1609	19308	46308	12.8633	5.36333	14.3633	34.6647	55.3688	24.3003	26.3917	1.07801	996.527	1007.38	0.19822	4184.39	29.6196	682.728	0.686077	1873.62	0	1741.73	1734.72	2.03687	0	1.52926
1610	19320	46320	12.8667	5.36667	14.3667	34.6705	55.3683	24.3101	26.401	1.07801	996.524	1007.38	0.19822	4184.38	29.621	682.565	0.686031	1873.04	0	1741.19	1734.19	2.03625	0	1.52926
1611	19332	46332	12.87	5.37	14.37	34.6764	55.3678	24.32	26.4102	1.07801	996.521	1007.38	0.19822	4184.37	29.6224	682.402	0.685986	1872.47	0	1740.66	1733.66	2.03563	0	1.52926
1612	19344	46344	12.8733	5.37333	14.3733	34.6822	55.3673	24.3299	26.4194	1.07801	996.518	1007.38	0.19822	4184.37	29.6238	682.238	0.68594	1871.9	0	1740.13	1733.13	2.035	0	1.52926
1613	19356	46356	12.8767	5.37667	14.3767	34.688	55.3667	24.3397	26.4287	1.07801	996.515	1007.38	0.19822	4184.36	29.6252	682.074	0.685894	1871.32	0	1739.59	1732.6	2.03437	0	1.52926
1614	19368	46368	12.88	5.38	14.38	34.6938	55.3661	24.3496	26.4379	1.07801	996.512	1007.38	0.19822	4184.36	29.6266	681.908	0.685848	1870.74	0	1739.05	1732.07	2.03374	0	1.52926
1615	19380	46380	12.8833	5.38333	14.3833	34.6996	55.3655	24.3594	26.4471	1.07802	996.509	1007.38	0.19822	4184.35	29.628	681.743	0.685802	1870.16	0	1738.51	1731.53	2.03311	0	1.52926
1616	19392	46392	12.8867	5.38667	14.3867	34.7054	55.3649	24.3693	26.4563	1.07802	996.506	1007.38	0.19822	4184.34	29.6294	681.576	0.685756	1869.58	0	1737.97	1731	2.03248	0	1.52926
1617	19404	46404	12.89	5.39	14.39	34.7111	55.3642	24.3791	26.4655	1.07802	996.503	1007.38	0.19822	4184.34	29.6307	681.409	0.68571	1869	0	1737.43	1730.46	2.03184	0	1.52926
1618	19416	46416	12.8933	5.39333	14.3933	34.7169	55.3634	24.389	26.4747	1.07802	996.5	1007.38	0.19822	4184.33	29.6321	681.242	0.685664	1868.41	0	1736.88	1729.92	2.03121	0	1.52926
1619	19428	46428	12.8967	5.39667	14.3967	34.7226	55.3627	24.3988	26.4839	1.07803	996.497	1007.38	0.19822	4184.33	29.6335	681.074	0.685618	1867.83	0	1736.34	1729.38	2.03057	0	1.52926
1620	19440	46440	12.9	5.4	14.4	34.7284	55.3619	24.4087	26.4931	1.07803	996.494	1007.38	0.19822	4184.32	29.6348	680.905	0.685572	1867.24	0	1735.79	1728.83	2.02993	0	1.52926
1621	19452	46452	12.9033	5.40333	14.4033	34.7341	55.3611	24.4185	26.5022	1.07803	996.491	1007.38	0.19822	4184.32	29.6362	680.735	0.685526	1866.65	0	1735.24	1728.29	2.02928	0	1.52926
1622	19464	46464	12.9067	5.40667	14.4067	34.7398	55.3602	24.4283	26.5114	1.07803	996.488	1007.38	0.19822	4184.31	29.6375	680.565	0.68548	1866.06	0	1734.68	1727.74	2.02864	0	1.52926
1623	19476	46476	12.91	5.41	14.41	34.7455	55.3594	24.4382	26.5206	1.07804	996.485	1007.38	0.19822	4184.3	29.6389	680.395	0.685434	1865.46	0	1734.13	1727.19	2.02799	0	1.52926
1624	19488	46488	12.9133	5.41333	14.4133	34.7512	55.3584	24.448	26.5298	1.07804	996.482	1007.38	0.19822	4184.3	29.6402	680.224	0.685388	1864.87	0	1733.58	1726.64	2.02734	0	1.52926
1625	19500	46500	12.9167	5.41667	14.4167	34.7569	55.3575	24.4578	26.5389	1.07804	996.479	1007.38	0.19822	4184.29	29.6416	680.052	0.685342	1864.27	0	1733.02	1726.09	2.02669	0	1.52926
1626	19512	46512	12.92	5.42	14.42	34.7625	55.3565	24.4676	26.5481	1.07805	996.476	1007.38	0.19822	4184.29	29.6429	679.879	0.685296	1863.67	0	1732.46	1725.54	2.02604	0	1.52926
1627	19524	46524	12.9233	5.42333	14.4233	34.7682	55.3555	24.4774	26.5572	1.07805	996.473	1007.38	0.19822	4184.28	29.6442	679.706	0.68525	1863.07	0	1731.9	1724.98	2.02538	0	1.52926
1628	19536	46536	12.9267	5.42667	14.4267	34.7738	55.3545	24.4873	26.5664	1.07805	996.47	1007.38	0.19822	4184.27	29.6455	679.532	0.685204	1862.47	0	1731.34	1724.43	2.02472	0	1.52926
1629	19548	46548	12.93	5.43	14.43	34.7795	55.3534	24.4971	26.5755	1.07806	996.467	1007.38	0.19822	4184.27	29.6468	679.358	0.685158	1861.87	0	1730.77	1723.87	2.02406	0	1.52926
1630	19560	46560	12.9333	5.43333	14.4333	34.7851	55.3523	24.5069	26.5846	1.07806	996.464	1007.38	0.19822	4184.26	29.6481	679.183	0.685112	1861.27	0	1730.21	1723.31	2.0234	0	1.52926
1631	19572	46572	12.9367	5.43667	14.4367	34.7907	55.3512	24.5167	26.5938	1.07806	996.461	1007.38	0.19822	4184.26	29.6494	679.008	0.685066	1860.66	0	1729.64	1722.75	2.02274	0	1.52926
1632	19584	46584	12.94	5.44	14.44	34.7963	55.35	24.5265	26.6029	1.07807	996.458	1007.38	0.19822	4184.25	29.6507	678.832	0.68502	1860.05	0	1729.07	1722.18	2.02208	0	1.52926
1633	19596	46596	12.9433	5.44333	14.4433	34.8018	55.3488	24.5363	26.612	1.07807	996.455	1007.38	0.19822	4184.25	29.652	678.655	0.684973	1859.44	0	1728.5	1721.62	2.02141	0	1.52926
1634	19608	46608	12.9467	5.44667	14.4467	34.8074	55.3476	24.5461	26.6211	1.07808	996.452	1007.38	0.19822	4184.24	29.6533	678.478	0.684927	1858.83	0	1727.93	1721.05	2.02074	0	1.52926
1635	19620	46620	12.95	5.45	14.45	34.813	55.3463	24.5559	26.6302	1.07808	996.449	1007.38	0.19822	4184.23	29.6546	678.3	0.684881	1858.22	0	1727.36	1720.48	2.02007	0	1.52926
1636	19632	46632	12.9533	5.45333	14.4533	34.8185	55.345	24.5656	26.6393	1.07808	996.446	1007.38	0.19822	4184.23	29.6558	678.121	0.684835	1857.6	0	1726.78	1719.91	2.0194	0	1.52926
1637	19644	46644	12.9567	5.45667	14.4567	34.824	55.3437	24.5754	26.6484	1.07809	996.443	1007.38	0.19822	4184.22	29.6571	677.942	0.684789	1856.99	0	1726.21	1719.34	2.01872	0	1.52926
1638	19656	46656	12.96	5.46	14.46	34.8295	55.3423	24.5852	26.6575	1.07809	996.44	1007.38	0.19822	4184.22	29.6584	677.762	0.684743	1856.37	0	1725.63	1718.77	2.01804	0	1.52926
1639	19668	46668	12.9633	5.46333	14.4633	34.8351	55.3409	24.595	26.6666	1.0781	996.437	1007.38	0.19822	4184.21	29.6596	677.582	0.684697	1855.75	0	1725.05	1718.19	2.01737	0	1.52926
1640	19680	46680	12.9667	5.46667	14.4667	34.8405	55.3395	24.6047	26.6757	1.0781	996.434	1007.38	0.19822	4184.2	29.6609	677.401	0.68465	1855.13	0	1724.46	1717.61	2.01668	0	1.52926
1641	19692	46692	12.97	5.47	14.47	34.846	55.3381	24.6145	26.6848	1.07811	996.431	1007.38	0.19822	4184.2	29.6621	677.219	0.684604	1854.51	0	1723.88	1717.04	2.016	0	1.52926
1642	19704	46704	12.9733	5.47333	14.4733	34.8515	55.3366	24.6243	26.6938	1.07811	996.428	1007.38	0.19822	4184.19	29.6633	677.037	0.684558	1853.88	0	1723.3	1716.46	2.01532	0	1.52926
1643	19716	46716	12.9767	5.47667	14.4767	34.857	55.335	24.634	26.7029	1.07812	996.425	1007.38	0.19822	4184.19	29.6646	676.854	0.684512	1853.26	0	1722.71	1715.87	2.01463	0	1.52926
1644	19728	46728	12.98	5.48	14.48	34.8624	55.3335	24.6438	26.7119	1.07812	996.422	1007.38	0.19822	4184.18	29.6658	676.671	0.684466	1852.63	0	1722.12	1715.29	2.01394	0	1.52926
1645	19740	46740	12.9833	5.48333	14.4833	34.8678	55.3319	24.6536	26.721	1.07813	996.419	1007.38	0.19822	4184.18	29.667	676.487	0.684419	1852	0	1721.53	1714.71	2.01325	0	1.52926
1646	19752	46752	12.9867	5.48667	14.4867	34.8733	55.3303	24.6633	26.73	1.07813	996.416	1007.38	0.19822	4184.17	29.6682	676.302	0.684373	1851.37	0	1720.94	1714.12	2.01256	0	1.52926
1647	19764	46764	12.99	5.49	14.49	34.8787	55.3287	24.6731	26.7391	1.07814	996.413	1007.38	0.19822	4184.16	29.6694	676.117	0.684327	1850.74	0	1720.34	1713.53	2.01186	0	1.52926
1648	19776	46776	12.9933	5.49333	14.4933	34.8841	55.327	24.6828	26.7481	1.07814	996.41	1007.38	0.19822	4184.16	29.6706	675.931	0.684281	1850.11	0	1719.75	1712.94	2.01117	0	1.52926
1649	19788	46788	12.9967	5.49667	14.4967	34.8895	55.3253	24.6925	26.7572	1.07815	996.407	1007.38	0.19822	4184.15	29.6718	675.745	0.684234	1849.47	0	1719.15	1712.35	2.01047	0	1.52926
1650	19800	46800	13	5.5	14.5	34.8948	55.3235	24.7023	26.7662	1.07816	996.404	1007.38	0.19822	4184.15	29.673	675.557	0.684188	1848.83	0	1718.55	1711.75	2.00977	0	1.52926
1651	19812	46812	13.0033	5.50333	14.5033	34.9002	55.3217	24.712	26.7752	1.07816	996.401	1007.38	0.19822	4184.14	29.6742	675.37	0.684142	1848.19	0	1717.95	1711.16	2.00907	0	1.52926
1652	19824	46824	13.0067	5.50667	14.5067	34.9055	55.3199	24.7218	26.7842	1.07817	996.398	1007.38	0.19822	4184.14	29.6754	675.182	0.684095	1847.55	0	1717.35	1710.56	2.00836	0	1.52926
1653	19836	46836	13.01	5.51	14.51	34.9109	55.3181	24.7315	26.7932	1.07817	996.395	1007.38	0.19822	4184.13	29.6766	674.993	0.684049	1846.91	0	1716.74	1709.96	2.00766	0	1.52926
1654	19848	46848	13.0133	5.51333	14.5133	34.9162	55.3162	24.7412	26.8022	1.07818	996.392	1007.38	0.19822	4184.12	29.6777	674.803	0.684003	1846.27	0	1716.14	1709.36	2.00695	0	1.52926
1655	19860	46860	13.0167	5.51667	14.5167	34.9215	55.3143	24.7509	26.8112	1.07819	996.389	1007.38	0.19822	4184.12	29.6789	674.613	0.683956	1845.62	0	1715.53	1708.76	2.00624	0	1.52926
1656	19872	46872	13.02	5.52	14.52	34.9268	55.3124	24.7606	26.8202	1.07819	996.386	1007.38	0.19822	4184.11	29.68	674.422	0.68391	1844.98	0	1714.92	1708.16	2.00553	0	1.52926
1657	19884	46884	13.0233	5.52333	14.5233	34.9321	55.3104	24.7704	26.8292	1.0782	996.383	1007.38	0.19822	4184.11	29.6812	674.231	0.683864	1844.33	0	1714.31	1707.55	2.00481	0	1.52926
1658	19896	46896	13.0267	5.52667	14.5267	34.9374	55.3084	24.7801	26.8382	1.0782	996.38	1007.38	0.19822	4184.1	29.6823	674.039	0.683817	1843.68	0	1713.7	1706.95	2.0041	0	1.52926
1659	19908	46908	13.03	5.53	14.53	34.9427	55.3064	24.7898	26.8472	1.07821	996.377	1007.38	0.19822	4184.1	29.6835	673.847	0.683771	1843.03	0	1713.09	1706.34	2.00338	0	1.52926
1660	19920	46920	13.0333	5.53333	14.5333	34.9479	55.3044	24.7995	26.8561	1.07822	996.374	1007.38	0.19822	4184.09	29.6846	673.654	0.683724	1842.37	0	1712.47	1705.73	2.00266	0	1.52926
1661	19932	46932	13.0367	5.53667	14.5367	34.9532	55.3023	24.8092	26.8651	1.07823	996.371	1007.38	0.19822	4184.09	29.6857	673.46	0.683678	1841.72	0	1711.85	1705.12	2.00194	0	1.52926
1662	19944	46944	13.04	5.54	14.54	34.9584	55.3001	24.8189	26.8741	1.07823	996.368	1007.38	0.19822	4184.08	29.6869	673.266	0.683631	1841.06	0	1711.24	1704.5	2.00121	0	1.52926
1663	19956	46956	13.0433	5.54333	14.5433	34.9636	55.298	24.8286	26.883	1.07824	996.365	1007.38	0.19822	4184.07	29.688	673.071	0.683585	1840.4	0	1710.62	1703.89	2.00049	0	1.52926
1664	19968	46968	13.0467	5.54667	14.5467	34.9688	55.2958	24.8383	26.892	1.07825	996.362	1007.38	0.19822	4184.07	29.6891	672.875	0.683538	1839.74	0	1709.99	1703.27	1.99976	0	1.52926
1665	19980	46980	13.05	5.55	14.55	34.974	55.2936	24.8479	26.9009	1.07825	996.359	1007.38	0.19822	4184.06	29.6902	672.679	0.683492	1839.08	0	1709.37	1702.65	1.99903	0	1.52926
1666	19992	46992	13.0533	5.55333	14.5533	34.9792	55.2913	24.8576	26.9098	1.07826	996.356	1007.38	0.19822	4184.06	29.6913	672.482	0.683445	1838.42	0	1708.74	1702.03	1.9983	0	1.52926
1667	20004	47004	13.0567	5.55667	14.5567	34.9844	55.289	24.8673	26.9188	1.07827	996.353	1007.38	0.19822	4184.05	29.6924	672.285	0.683399	1837.76	0	1708.12	1701.41	1.99757	0	1.52926
1668	20016	47016	13.06	5.56	14.56	34.9895	55.2867	24.877	26.9277	1.07828	996.35	1007.38	0.19822	4184.05	29.6935	672.087	0.683352	1837.09	0	1707.49	1700.79	1.99683	0	1.52926
1669	20028	47028	13.0633	5.56333	14.5633	34.9947	55.2844	24.8866	26.9366	1.07828	996.347	1007.38	0.19822	4184.04	29.6945	671.889	0.683306	1836.42	0	1706.86	1700.16	1.99609	0	1.52926
1670	20040	47040	13.0667	5.56667	14.5667	34.9998	55.282	24.8963	26.9455	1.07829	996.344	1007.38	0.19822	4184.03	29.6956	671.689	0.683259	1835.75	0	1706.23	1699.54	1.99536	0	1.52926
1671	20052	47052	13.07	5.57	14.57	35.0049	55.2796	24.906	26.9544	1.0783	996.341	1007.38	0.19822	4184.03	29.6967	671.49	0.683213	1835.08	0	1705.59	1698.91	1.99461	0	1.52926
1672	20064	47064	13.0733	5.57333	14.5733	35.01	55.2772	24.9156	26.9633	1.07831	996.339	1007.37	0.19822	4184.02	29.6978	671.289	0.683166	1834.41	0	1704.96	1698.28	1.99387	0	1.52926
1673	20076	47076	13.0767	5.57667	14.5767	35.0151	55.2747	24.9253	26.9722	1.07832	996.336	1007.37	0.19822	4184.02	29.6988	671.088	0.683119	1833.73	0	1704.32	1697.65	1.99313	0	1.52926
1674	20088	47088	13.08	5.58	14.58	35.0202	55.2722	24.9349	26.9811	1.07832	996.333	1007.37	0.19822	4184.01	29.6999	670.887	0.683073	1833.06	0	1703.68	1697.01	1.99238	0	1.52926
1675	20100	47100	13.0833	5.58333	14.5833	35.0253	55.2696	24.9446	26.99	1.07833	996.33	1007.37	0.19822	4184.01	29.7009	670.685	0.683026	1832.38	0	1703.04	1696.38	1.99163	0	1.52926
1676	20112	47112	13.0867	5.58667	14.5867	35.0303	55.2671	24.9542	26.9989	1.07834	996.327	1007.37	0.19822	4184	29.702	670.482	0.68298	1831.7	0	1702.4	1695.74	1.99088	0	1.52926
1677	20124	47124	13.09	5.59	14.59	35.0354	55.2645	24.9639	27.0078	1.07835	996.324	1007.37	0.19822	4184	29.703	670.279	0.682933	1831.02	0	1701.76	1695.1	1.99013	0	1.52926
1678	20136	47136	13.0933	5.59333	14.5933	35.0404	55.2619	24.9735	27.0166	1.07836	996.321	1007.37	0.19822	4183.99	29.704	670.075	0.682886	1830.34	0	1701.11	1694.46	1.98937	0	1.52926
1679	20148	47148	13.0967	5.59667	14.5967	35.0454	55.2592	24.9832	27.0255	1.07837	996.318	1007.37	0.19822	4183.98	29.705	669.87	0.68284	1829.66	0	1700.46	1693.82	1.98862	0	1.52926
1680	20160	47160	13.1	5.6	14.6	35.0505	55.2565	24.9928	27.0344	1.07838	996.315	1007.37	0.19822	4183.98	29.7061	669.665	0.682793	1828.97	0	1699.81	1693.18	1.98786	0	1.52926
1681	20172	47172	13.1033	5.60333	14.6033	35.0555	55.2538	25.0024	27.0432	1.07839	996.312	1007.37	0.19822	4183.97	29.7071	669.459	0.682746	1828.28	0	1699.16	1692.53	1.9871	0	1.52926
1682	20184	47184	13.1067	5.60667	14.6067	35.0605	55.251	25.012	27.0521	1.07839	996.309	1007.37	0.19822	4183.97	29.7081	669.253	0.682699	1827.59	0	1698.51	1691.89	1.98633	0	1.52926
1683	20196	47196	13.11	5.61	14.61	35.0654	55.2482	25.0217	27.0609	1.0784	996.306	1007.37	0.19822	4183.96	29.7091	669.046	0.682653	1826.9	0	1697.86	1691.24	1.98557	0	1.52926
1684	20208	47208	13.1133	5.61333	14.6133	35.0704	55.2454	25.0313	27.0697	1.07841	996.303	1007.37	0.19822	4183.96	29.7101	668.839	0.682606	1826.21	0	1697.2	1690.59	1.9848	0	1.52926
1685	20220	47220	13.1167	5.61667	14.6167	35.0753	55.2426	25.0409	27.0786	1.07842	996.3	1007.37	0.19822	4183.95	29.7111	668.63	0.682559	1825.52	0	1696.55	1689.94	1.98404	0	1.52926
1686	20232	47232	13.12	5.62	14.62	35.0803	55.2397	25.0505	27.0874	1.07843	996.297	1007.37	0.19822	4183.95	29.712	668.422	0.682512	1824.82	0	1695.89	1689.29	1.98327	0	1.52926
1687	20244	47244	13.1233	5.62333	14.6233	35.0852	55.2368	25.0601	27.0962	1.07844	996.294	1007.37	0.19822	4183.94	29.713	668.212	0.682465	1824.13	0	1695.23	1688.63	1.98249	0	1.52926
1688	20256	47256	13.1267	5.62667	14.6267	35.0901	55.2338	25.0697	27.105	1.07845	996.291	1007.37	0.19822	4183.94	29.714	668.002	0.682419	1823.43	0	1694.57	1687.98	1.98172	0	1.52926
1689	20268	47268	13.13	5.63	14.63	35.095	55.2308	25.0793	27.1138	1.07846	996.288	1007.37	0.19822	4183.93	29.715	667.792	0.682372	1822.73	0	1693.9	1687.32	1.98095	0	1.52926
1690	20280	47280	13.1333	5.63333	14.6333	35.0999	55.2278	25.0889	27.1226	1.07847	996.285	1007.37	0.19822	4183.92	29.7159	667.581	0.682325	1822.03	0	1693.24	1686.66	1.98017	0	1.52926
1691	20292	47292	13.1367	5.63667	14.6367	35.1048	55.2248	25.0985	27.1314	1.07848	996.282	1007.37	0.19822	4183.92	29.7169	667.369	0.682278	1821.32	0	1692.57	1686	1.97939	0	1.52926
1692	20304	47304	13.14	5.64	14.64	35.1097	55.2217	25.1081	27.1402	1.07849	996.279	1007.37	0.19822	4183.91	29.7178	667.157	0.682231	1820.62	0	1691.9	1685.34	1.97861	0	1.52926
1693	20316	47316	13.1433	5.64333	14.6433	35.1145	55.2186	25.1176	27.149	1.0785	996.276	1007.37	0.19822	4183.91	29.7188	666.944	0.682184	1819.91	0	1691.23	1684.67	1.97782	0	1.52926
1694	20328	47328	13.1467	5.64667	14.6467	35.1194	55.2155	25.1272	27.1578	1.07851	996.273	1007.37	0.19822	4183.9	29.7197	666.73	0.682137	1819.21	0	1690.56	1684.01	1.97704	0	1.52926
1695	20340	47340	13.15	5.65	14.65	35.1242	55.2123	25.1368	27.1665	1.07852	996.27	1007.37	0.19822	4183.9	29.7206	666.516	0.68209	1818.5	0	1689.89	1683.34	1.97625	0	1.52926
1696	20352	47352	13.1533	5.65333	14.6533	35.129	55.2091	25.1463	27.1753	1.07853	996.267	1007.37	0.19822	4183.89	29.7216	666.301	0.682043	1817.79	0	1689.22	1682.67	1.97546	0	1.52926
1697	20364	47364	13.1567	5.65667	14.6567	35.1338	55.2059	25.1559	27.1841	1.07854	996.264	1007.37	0.19822	4183.89	29.7225	666.086	0.681996	1817.07	0	1688.54	1682	1.97467	0	1.52926
1698	20376	47376	13.16	5.66	14.66	35.1386	55.2026	25.1655	27.1928	1.07855	996.261	1007.37	0.19822	4183.88	29.7234	665.87	0.681949	1816.36	0	1687.86	1681.33	1.97388	0	1.52926
1699	20388	47388	13.1633	5.66333	14.6633	35.1434	55.1993	25.175	27.2016	1.07857	996.258	1007.37	0.19822	4183.87	29.7243	665.654	0.681902	1815.64	0	1687.18	1680.65	1.97308	0	1.52926
1700	20400	47400	13.1667	5.66667	14.6667	35.1482	55.196	25.1846	27.2103	1.07858	996.255	1007.37	0.19822	4183.87	29.7252	665.437	0.681855	1814.93	0	1686.5	1679.98	1.97229	0	1.52926
1701	20412	47412	13.17	5.67	14.67	35.1529	55.1926	25.1941	27.219	1.07859	996.253	1007.37	0.19822	4183.86	29.7261	665.219	0.681808	1814.21	0	1685.82	1679.3	1.97149	0	1.52926
1702	20424	47424	13.1733	5.67333	14.6733	35.1577	55.1892	25.2037	27.2278	1.0786	996.25	1007.37	0.19822	4183.86	29.727	665.001	0.681761	1813.49	0	1685.13	1678.62	1.97069	0	1.52926
1703	20436	47436	13.1767	5.67667	14.6767	35.1624	55.1858	25.2132	27.2365	1.07861	996.247	1007.37	0.19822	4183.85	29.7279	664.782	0.681714	1812.76	0	1684.45	1677.94	1.96989	0	1.52926
1704	20448	47448	13.18	5.68	14.68	35.1671	55.1824	25.2228	27.2452	1.07862	996.244	1007.37	0.19822	4183.85	29.7288	664.562	0.681667	1812.04	0	1683.76	1677.26	1.96908	0	1.52926
1705	20460	47460	13.1833	5.68333	14.6833	35.1718	55.1789	25.2323	27.2539	1.07863	996.241	1007.37	0.19822	4183.84	29.7296	664.342	0.68162	1811.31	0	1683.07	1676.57	1.96827	0	1.52926
1706	20472	47472	13.1867	5.68667	14.6867	35.1765	55.1754	25.2418	27.2626	1.07864	996.238	1007.37	0.19822	4183.84	29.7305	664.122	0.681572	1810.59	0	1682.38	1675.89	1.96747	0	1.52926
1707	20484	47484	13.19	5.69	14.69	35.1812	55.1718	25.2513	27.2713	1.07866	996.235	1007.37	0.19822	4183.83	29.7314	663.9	0.681525	1809.86	0	1681.69	1675.2	1.96666	0	1.52926
1708	20496	47496	13.1933	5.69333	14.6933	35.1859	55.1683	25.2609	27.28	1.07867	996.232	1007.37	0.19822	4183.83	29.7322	663.678	0.681478	1809.13	0	1680.99	1674.51	1.96584	0	1.52926
1709	20508	47508	13.1967	5.69667	14.6967	35.1905	55.1647	25.2704	27.2887	1.07868	996.229	1007.37	0.19822	4183.82	29.7331	663.456	0.681431	1808.4	0	1680.3	1673.82	1.96503	0	1.52926
1710	20520	47520	13.2	5.7	14.7	35.1952	55.161	25.2799	27.2974	1.07869	996.226	1007.37	0.19822	4183.82	29.7339	663.233	0.681384	1807.66	0	1679.6	1673.13	1.96422	0	1.52926
1711	20532	47532	13.2033	5.70333	14.7033	35.1998	55.1573	25.2894	27.3061	1.0787	996.223	1007.37	0.19822	4183.81	29.7348	663.009	0.681336	1806.93	0	1678.9	1672.44	1.9634	0	1.52926
1712	20544	47544	13.2067	5.70667	14.7067	35.2045	55.1536	25.2989	27.3147	1.07872	996.22	1007.37	0.19822	4183.8	29.7356	662.785	0.681289	1806.19	0	1678.2	1671.74	1.96258	0	1.52926
1713	20556	47556	13.21	5.71	14.71	35.2091	55.1499	25.3084	27.3234	1.07873	996.217	1007.37	0.19822	4183.8	29.7364	662.56	0.681242	1805.46	0	1677.5	1671.05	1.96176	0	1.52926
1714	20568	47568	13.2133	5.71333	14.7133	35.2137	55.1461	25.3179	27.332	1.07874	996.214	1007.37	0.19822	4183.79	29.7373	662.335	0.681195	1804.72	0	1676.79	1670.35	1.96093	0	1.52926
1715	20580	47580	13.2167	5.71667	14.7167	35.2183	55.1424	25.3274	27.3407	1.07875	996.211	1007.37	0.19822	4183.79	29.7381	662.109	0.681147	1803.97	0	1676.09	1669.65	1.96011	0	1.52926
1716	20592	47592	13.22	5.72	14.72	35.2228	55.1385	25.3369	27.3493	1.07877	996.208	1007.37	0.19822	4183.78	29.7389	661.882	0.6811	1803.23	0	1675.38	1668.95	1.95928	0	1.52926
1717	20604	47604	13.2233	5.72333	14.7233	35.2274	55.1347	25.3464	27.358	1.07878	996.205	1007.37	0.19822	4183.78	29.7397	661.655	0.681053	1802.49	0	1674.67	1668.24	1.95845	0	1.52926
1718	20616	47616	13.2267	5.72667	14.7267	35.2319	55.1308	25.3559	27.3666	1.07879	996.202	1007.37	0.19822	4183.77	29.7405	661.427	0.681005	1801.74	0	1673.96	1667.54	1.95762	0	1.52926
1719	20628	47628	13.23	5.73	14.73	35.2365	55.1269	25.3653	27.3752	1.07881	996.199	1007.37	0.19822	4183.77	29.7413	661.199	0.680958	1800.99	0	1673.25	1666.83	1.95679	0	1.52926
1720	20640	47640	13.2333	5.73333	14.7333	35.241	55.1229	25.3748	27.3839	1.07882	996.197	1007.37	0.19822	4183.76	29.7421	660.97	0.68091	1800.25	0	1672.53	1666.13	1.95595	0	1.52926
1721	20652	47652	13.2367	5.73667	14.7367	35.2455	55.1189	25.3843	27.3925	1.07883	996.194	1007.37	0.19822	4183.76	29.7429	660.74	0.680863	1799.49	0	1671.82	1665.42	1.95512	0	1.52926
1722	20664	47664	13.24	5.74	14.74	35.25	55.1149	25.3937	27.4011	1.07884	996.191	1007.37	0.19822	4183.75	29.7436	660.51	0.680815	1798.74	0	1671.1	1664.7	1.95428	0	1.52926
1723	20676	47676	13.2433	5.74333	14.7433	35.2545	55.1109	25.4032	27.4097	1.07886	996.188	1007.37	0.19822	4183.75	29.7444	660.28	0.680768	1797.99	0	1670.38	1663.99	1.95344	0	1.52926
1724	20688	47688	13.2467	5.74667	14.7467	35.259	55.1068	25.4127	27.4183	1.07887	996.185	1007.37	0.19822	4183.74	29.7452	660.048	0.68072	1797.23	0	1669.66	1663.28	1.9526	0	1.52926
1725	20700	47700	13.25	5.75	14.75	35.2635	55.1027	25.4221	27.4269	1.07889	996.182	1007.37	0.19822	4183.74	29.7459	659.816	0.680673	1796.48	0	1668.94	1662.56	1.95175	0	1.52926
1726	20712	47712	13.2533	5.75333	14.7533	35.2679	55.0985	25.4316	27.4355	1.0789	996.179	1007.37	0.19822	4183.73	29.7467	659.584	0.680625	1795.72	0	1668.22	1661.84	1.95091	0	1.52926
1727	20724	47724	13.2567	5.75667	14.7567	35.2724	55.0944	25.441	27.4441	1.07891	996.176	1007.37	0.19822	4183.72	29.7474	659.351	0.680578	1794.96	0	1667.49	1661.13	1.95006	0	1.52926
1728	20736	47736	13.26	5.76	14.76	35.2768	55.0902	25.4504	27.4526	1.07893	996.173	1007.36	0.19822	4183.72	29.7482	659.117	0.68053	1794.2	0	1666.77	1660.41	1.94921	0	1.52926
1729	20748	47748	13.2633	5.76333	14.7633	35.2812	55.0859	25.4599	27.4612	1.07894	996.17	1007.36	0.19822	4183.71	29.7489	658.883	0.680483	1793.43	0	1666.04	1659.68	1.94836	0	1.52926
1730	20760	47760	13.2667	5.76667	14.7667	35.2856	55.0817	25.4693	27.4698	1.07895	996.167	1007.36	0.19822	4183.71	29.7496	658.648	0.680435	1792.67	0	1665.31	1658.96	1.94751	0	1.52926
1731	20772	47772	13.27	5.77	14.77	35.29	55.0774	25.4787	27.4783	1.07897	996.164	1007.36	0.19822	4183.7	29.7504	658.412	0.680387	1791.9	0	1664.58	1658.23	1.94665	0	1.52926
1732	20784	47784	13.2733	5.77333	14.7733	35.2944	55.073	25.4882	27.4869	1.07898	996.161	1007.36	0.19822	4183.7	29.7511	658.176	0.68034	1791.13	0	1663.85	1657.51	1.94579	0	1.52926
1733	20796	47796	13.2767	5.77667	14.7767	35.2987	55.0687	25.4976	27.4954	1.079	996.158	1007.36	0.19822	4183.69	29.7518	657.94	0.680292	1790.36	0	1663.11	1656.78	1.94494	0	1.52926
1734	20808	47808	13.28	5.78	14.78	35.3031	55.0643	25.507	27.5039	1.07901	996.155	1007.36	0.19822	4183.69	29.7525	657.703	0.680244	1789.59	0	1662.38	1656.05	1.94407	0	1.52926
1735	20820	47820	13.2833	5.78333	14.7833	35.3074	55.0599	25.5164	27.5125	1.07903	996.152	1007.36	0.19822	4183.68	29.7532	657.465	0.680196	1788.82	0	1661.64	1655.32	1.94321	0	1.52926
1736	20832	47832	13.2867	5.78667	14.7867	35.3118	55.0554	25.5258	27.521	1.07904	996.15	1007.36	0.19822	4183.68	29.7539	657.226	0.680149	1788.05	0	1660.9	1654.58	1.94235	0	1.52926
1737	20844	47844	13.29	5.79	14.79	35.3161	55.0509	25.5352	27.5295	1.07906	996.147	1007.36	0.19822	4183.67	29.7546	656.987	0.680101	1787.27	0	1660.16	1653.85	1.94148	0	1.52926
1738	20856	47856	13.2933	5.79333	14.7933	35.3204	55.0464	25.5446	27.538	1.07907	996.144	1007.36	0.19822	4183.67	29.7553	656.748	0.680053	1786.49	0	1659.42	1653.11	1.94061	0	1.52926
1739	20868	47868	13.2967	5.79667	14.7967	35.3247	55.0419	25.554	27.5465	1.07909	996.141	1007.36	0.19822	4183.66	29.7559	656.508	0.680005	1785.71	0	1658.67	1652.37	1.93974	0	1.52926
1740	20880	47880	13.3	5.8	14.8	35.329	55.0373	25.5634	27.555	1.0791	996.138	1007.36	0.19822	4183.66	29.7566	656.267	0.679957	1784.93	0	1657.93	1651.63	1.93887	0	1.52926
1741	20892	47892	13.3033	5.80333	14.8033	35.3332	55.0327	25.5728	27.5635	1.07912	996.135	1007.36	0.19822	4183.65	29.7573	656.026	0.67991	1784.15	0	1657.18	1650.89	1.938	0	1.52926
1742	20904	47904	13.3067	5.80667	14.8067	35.3375	55.0281	25.5821	27.572	1.07913	996.132	1007.36	0.19822	4183.65	29.7579	655.784	0.679862	1783.37	0	1656.43	1650.15	1.93712	0	1.52926
1743	20916	47916	13.31	5.81	14.81	35.3418	55.0234	25.5915	27.5805	1.07915	996.129	1007.36	0.19822	4183.64	29.7586	655.541	0.679814	1782.58	0	1655.68	1649.41	1.93624	0	1.52926
1744	20928	47928	13.3133	5.81333	14.8133	35.346	55.0187	25.6009	27.5889	1.07916	996.126	1007.36	0.19822	4183.64	29.7592	655.298	0.679766	1781.8	0	1654.93	1648.66	1.93536	0	1.52926
1745	20940	47940	13.3167	5.81667	14.8167	35.3502	55.014	25.6103	27.5974	1.07918	996.123	1007.36	0.19822	4183.63	29.7599	655.055	0.679718	1781.01	0	1654.17	1647.91	1.93448	0	1.52926
1746	20952	47952	13.32	5.82	14.82	35.3544	55.0092	25.6196	27.6059	1.07919	996.12	1007.36	0.19822	4183.63	29.7605	654.81	0.67967	1780.22	0	1653.42	1647.16	1.9336	0	1.52926
1747	20964	47964	13.3233	5.82333	14.8233	35.3586	55.0044	25.629	27.6143	1.07921	996.117	1007.36	0.19822	4183.62	29.7612	654.565	0.679622	1779.43	0	1652.66	1646.41	1.93272	0	1.52926
1748	20976	47976	13.3267	5.82667	14.8267	35.3628	54.9996	25.6383	27.6228	1.07923	996.115	1007.36	0.19822	4183.61	29.7618	654.32	0.679574	1778.63	0	1651.9	1645.66	1.93183	0	1.52926
1749	20988	47988	13.33	5.83	14.83	35.367	54.9947	25.6477	27.6312	1.07924	996.112	1007.36	0.19822	4183.61	29.7624	654.074	0.679526	1777.84	0	1651.14	1644.91	1.93094	0	1.52926
1750	21000	48000	13.3333	5.83333	14.8333	35.3711	54.9898	25.657	27.6397	1.07926	996.109	1007.36	0.19822	4183.6	29.763	653.827	0.679478	1777.04	0	1650.38	1644.15	1.93005	0	1.52926
1751	21012	48012	13.3367	5.83667	14.8367	35.3753	54.9849	25.6664	27.6481	1.07927	996.106	1007.36	0.19822	4183.6	29.7636	653.58	0.679429	1776.25	0	1649.62	1643.39	1.92916	0	1.52926
1752	21024	48024	13.34	5.84	14.84	35.3794	54.98	25.6757	27.6565	1.07929	996.103	1007.36	0.19822	4183.59	29.7642	653.333	0.679381	1775.45	0	1648.86	1642.63	1.92826	0	1.52926
1753	21036	48036	13.3433	5.84333	14.8433	35.3835	54.975	25.685	27.6649	1.07931	996.1	1007.36	0.19822	4183.59	29.7648	653.084	0.679333	1774.65	0	1648.09	1641.87	1.92737	0	1.52926
1754	21048	48048	13.3467	5.84667	14.8467	35.3876	54.97	25.6944	27.6733	1.07932	996.097	1007.36	0.19822	4183.58	29.7654	652.835	0.679285	1773.84	0	1647.32	1641.11	1.92647	0	1.52926
1755	21060	48060	13.35	5.85	14.85	35.3917	54.9649	25.7037	27.6817	1.07934	996.094	1007.36	0.19822	4183.58	29.766	652.586	0.679237	1773.04	0	1646.55	1640.35	1.92557	0	1.52926
1756	21072	48072	13.3533	5.85333	14.8533	35.3958	54.9599	25.713	27.6901	1.07936	996.091	1007.36	0.19822	4183.57	29.7666	652.336	0.679189	1772.24	0	1645.78	1639.58	1.92467	0	1.52926
1757	21084	48084	13.3567	5.85667	14.8567	35.3999	54.9548	25.7223	27.6985	1.07937	996.088	1007.36	0.19822	4183.57	29.7672	652.085	0.67914	1771.43	0	1645.01	1638.82	1.92376	0	1.52926
1758	21096	48096	13.36	5.86	14.86	35.404	54.9496	25.7316	27.7069	1.07939	996.085	1007.36	0.19822	4183.56	29.7677	651.834	0.679092	1770.62	0	1644.23	1638.05	1.92286	0	1.52926
1759	21108	48108	13.3633	5.86333	14.8633	35.408	54.9445	25.7409	27.7153	1.07941	996.082	1007.36	0.19822	4183.56	29.7683	651.582	0.679044	1769.81	0	1643.46	1637.28	1.92195	0	1.52926
1760	21120	48120	13.3667	5.86667	14.8667	35.4121	54.9393	25.7502	27.7237	1.07943	996.08	1007.36	0.19822	4183.55	29.7688	651.33	0.678995	1769	0	1642.68	1636.51	1.92104	0	1.52926
1761	21132	48132	13.37	5.87	14.87	35.4161	54.934	25.7595	27.732	1.07944	996.077	1007.36	0.19822	4183.55	29.7694	651.077	0.678947	1768.19	0	1641.9	1635.74	1.92013	0	1.52926
1762	21144	48144	13.3733	5.87333	14.8733	35.4201	54.9288	25.7688	27.7404	1.07946	996.074	1007.36	0.19822	4183.54	29.7699	650.823	0.678899	1767.37	0	1641.12	1634.96	1.91922	0	1.52926
1763	21156	48156	13.3767	5.87667	14.8767	35.4241	54.9235	25.7781	27.7488	1.07948	996.071	1007.36	0.19822	4183.54	29.7705	650.569	0.67885	1766.56	0	1640.34	1634.19	1.91831	0	1.52926
1764	21168	48168	13.38	5.88	14.88	35.4281	54.9182	25.7874	27.7571	1.0795	996.068	1007.36	0.19822	4183.53	29.771	650.314	0.678802	1765.74	0	1639.56	1633.41	1.91739	0	1.52926
1765	21180	48180	13.3833	5.88333	14.8833	35.4321	54.9128	25.7967	27.7654	1.07951	996.065	1007.36	0.19822	4183.53	29.7715	650.059	0.678753	1764.92	0	1638.77	1632.63	1.91647	0	1.52926
1766	21192	48192	13.3867	5.88667	14.8867	35.436	54.9074	25.8059	27.7738	1.07953	996.062	1007.36	0.19822	4183.52	29.7721	649.803	0.678705	1764.1	0	1637.99	1631.85	1.91555	0	1.52926
1767	21204	48204	13.39	5.89	14.89	35.44	54.902	25.8152	27.7821	1.07955	996.059	1007.35	0.19822	4183.52	29.7726	649.546	0.678656	1763.28	0	1637.2	1631.07	1.91463	0	1.52926
1768	21216	48216	13.3933	5.89333	14.8933	35.4439	54.8966	25.8245	27.7904	1.07957	996.056	1007.35	0.19822	4183.51	29.7731	649.289	0.678608	1762.45	0	1636.41	1630.28	1.91371	0	1.52926
1769	21228	48228	13.3967	5.89667	14.8967	35.4478	54.8911	25.8337	27.7987	1.07959	996.053	1007.35	0.19822	4183.51	29.7736	649.032	0.678559	1761.63	0	1635.62	1629.5	1.91278	0	1.52926
1770	21240	48240	13.4	5.9	14.9	35.4518	54.8856	25.843	27.807	1.0796	996.051	1007.35	0.19822	4183.5	29.7741	648.774	0.678511	1760.8	0	1634.82	1628.71	1.91185	0	1.52926
1771	21252	48252	13.4033	5.90333	14.9033	35.4557	54.8801	25.8522	27.8154	1.07962	996.048	1007.35	0.19822	4183.5	29.7746	648.515	0.678462	1759.97	0	1634.03	1627.92	1.91093	0	1.52926
1772	21264	48264	13.4067	5.90667	14.9067	35.4595	54.8745	25.8615	27.8236	1.07964	996.045	1007.35	0.19822	4183.49	29.7751	648.255	0.678413	1759.14	0	1633.23	1627.13	1.90999	0	1.52926
1773	21276	48276	13.41	5.91	14.91	35.4634	54.8689	25.8707	27.8319	1.07966	996.042	1007.35	0.19822	4183.49	29.7756	647.995	0.678365	1758.31	0	1632.44	1626.34	1.90906	0	1.52926
1774	21288	48288	13.4133	5.91333	14.9133	35.4673	54.8633	25.88	27.8402	1.07968	996.039	1007.35	0.19822	4183.48	29.776	647.735	0.678316	1757.48	0	1631.64	1625.55	1.90813	0	1.52926
1775	21300	48300	13.4167	5.91667	14.9167	35.4711	54.8576	25.8892	27.8485	1.0797	996.036	1007.35	0.19822	4183.48	29.7765	647.474	0.678267	1756.64	0	1630.84	1624.76	1.90719	0	1.52926
1776	21312	48312	13.42	5.92	14.92	35.475	54.8519	25.8984	27.8568	1.07972	996.033	1007.35	0.19822	4183.47	29.777	647.212	0.678218	1755.81	0	1630.03	1623.96	1.90625	0	1.52926
1777	21324	48324	13.4233	5.92333	14.9233	35.4788	54.8462	25.9076	27.865	1.07973	996.03	1007.35	0.19822	4183.47	29.7774	646.95	0.67817	1754.97	0	1629.23	1623.16	1.90531	0	1.52926
1778	21336	48336	13.4267	5.92667	14.9267	35.4826	54.8405	25.9169	27.8733	1.07975	996.027	1007.35	0.19822	4183.46	29.7779	646.687	0.678121	1754.13	0	1628.43	1622.36	1.90437	0	1.52926
1779	21348	48348	13.43	5.93	14.93	35.4864	54.8347	25.9261	27.8815	1.07977	996.025	1007.35	0.19822	4183.46	29.7783	646.424	0.678072	1753.29	0	1627.62	1621.56	1.90343	0	1.52926
1780	21360	48360	13.4333	5.93333	14.9333	35.4902	54.8289	25.9353	27.8898	1.07979	996.022	1007.35	0.19822	4183.45	29.7788	646.16	0.678023	1752.45	0	1626.81	1620.76	1.90248	0	1.52926
1781	21372	48372	13.4367	5.93667	14.9367	35.494	54.823	25.9445	27.898	1.07981	996.019	1007.35	0.19822	4183.45	29.7792	645.895	0.677974	1751.6	0	1626	1619.96	1.90154	0	1.52926
1782	21384	48384	13.44	5.94	14.94	35.4978	54.8172	25.9537	27.9062	1.07983	996.016	1007.35	0.19822	4183.44	29.7796	645.63	0.677925	1750.76	0	1625.19	1619.15	1.90059	0	1.52926
1783	21396	48396	13.4433	5.94333	14.9433	35.5015	54.8113	25.9629	27.9145	1.07985	996.013	1007.35	0.19822	4183.44	29.78	645.364	0.677876	1749.91	0	1624.38	1618.35	1.89964	0	1.52926
1784	21408	48408	13.4467	5.94667	14.9467	35.5053	54.8053	25.9721	27.9227	1.07987	996.01	1007.35	0.19822	4183.43	29.7805	645.098	0.677827	1749.06	0	1623.56	1617.54	1.89868	0	1.52926
1785	21420	48420	13.45	5.95	14.95	35.509	54.7994	25.9812	27.9309	1.07989	996.007	1007.35	0.19822	4183.43	29.7809	644.831	0.677778	1748.21	0	1622.75	1616.73	1.89773	0	1.52926
1786	21432	48432	13.4533	5.95333	14.9533	35.5127	54.7934	25.9904	27.9391	1.07991	996.004	1007.35	0.19822	4183.42	29.7813	644.564	0.677729	1747.36	0	1621.93	1615.92	1.89677	0	1.52926
1787	21444	48444	13.4567	5.95667	14.9567	35.5164	54.7874	25.9996	27.9473	1.07993	996.002	1007.35	0.19822	4183.42	29.7817	644.296	0.67768	1746.51	0	1621.11	1615.1	1.89582	0	1.52926
1788	21456	48456	13.46	5.96	14.96	35.5201	54.7813	26.0088	27.9555	1.07995	995.999	1007.35	0.19822	4183.41	29.7821	644.027	0.677631	1745.65	0	1620.29	1614.29	1.89486	0	1.52926
1789	21468	48468	13.4633	5.96333	14.9633	35.5238	54.7752	26.0179	27.9637	1.07997	995.996	1007.35	0.19822	4183.41	29.7825	643.758	0.677582	1744.8	0	1619.47	1613.47	1.89389	0	1.52926
1790	21480	48480	13.4667	5.96667	14.9667	35.5275	54.7691	26.0271	27.9719	1.07999	995.993	1007.35	0.19822	4183.4	29.7828	643.488	0.677533	1743.94	0	1618.64	1612.66	1.89293	0	1.52926
1791	21492	48492	13.47	5.97	14.97	35.5311	54.7629	26.0363	27.98	1.08001	995.99	1007.35	0.19822	4183.4	29.7832	643.218	0.677484	1743.08	0	1617.82	1611.84	1.89197	0	1.52926
1792	21504	48504	13.4733	5.97333	14.9733	35.5348	54.7568	26.0454	27.9882	1.08003	995.987	1007.35	0.19822	4183.39	29.7836	642.947	0.677435	1742.22	0	1616.99	1611.02	1.891	0	1.52926
1793	21516	48516	13.4767	5.97667	14.9767	35.5384	54.7506	26.0546	27.9964	1.08005	995.984	1007.35	0.19822	4183.39	29.784	642.676	0.677385	1741.36	0	1616.16	1610.19	1.89003	0	1.52926
1794	21528	48528	13.48	5.98	14.98	35.542	54.7443	26.0637	28.0045	1.08007	995.981	1007.35	0.19822	4183.38	29.7843	642.404	0.677336	1740.49	0	1615.33	1609.37	1.88906	0	1.52926
1795	21540	48540	13.4833	5.98333	14.9833	35.5456	54.738	26.0728	28.0126	1.08009	995.979	1007.35	0.19822	4183.38	29.7847	642.131	0.677287	1739.63	0	1614.5	1608.54	1.88809	0	1.52926
1796	21552	48552	13.4867	5.98667	14.9867	35.5492	54.7317	26.082	28.0208	1.08011	995.976	1007.35	0.19822	4183.37	29.785	641.858	0.677237	1738.76	0	1613.67	1607.72	1.88711	0	1.52926
1797	21564	48564	13.49	5.99	14.99	35.5528	54.7254	26.0911	28.0289	1.08013	995.973	1007.35	0.19822	4183.37	29.7854	641.584	0.677188	1737.89	0	1612.83	1606.89	1.88614	0	1.52926
1798	21576	48576	13.4933	5.99333	14.9933	35.5564	54.7191	26.1002	28.037	1.08016	995.97	1007.34	0.19822	4183.36	29.7857	641.31	0.677139	1737.02	0	1612	1606.06	1.88516	0	1.52926
1799	21588	48588	13.4967	5.99667	14.9967	35.5599	54.7127	26.1093	28.0452	1.08018	995.967	1007.34	0.19822	4183.36	29.786	641.035	0.677089	1736.15	0	1611.16	1605.23	1.88418	0	1.52926
1800	21600	48600	13.5	6	15	35.5635	54.7062	26.1185	28.0533	1.0802	995.964	1007.34	0.19822	4183.35	29.7863	640.76	0.67704	1735.28	0.0221271	1610.32	1604.4	1.8832	1399.45	1.53393
1801	21612	48612	13.5033	6.00333	15.0033	35.567	54.6998	26.1195	28.0614	1.08022	995.964	1007.34	0.19822	4183.35	29.7867	640.483	0.67699	1734.4	0.022127	1609.48	1610.22	1.88222	1399.54	1.53859
1802	21624	48624	13.5067	6.00667	15.0067	35.5656	54.6933	26.1206	28.0619	1.08024	995.964	1007.34	0.19822	4183.35	29.787	640.207	0.676984	1733.64	0.022127	1609.05	1609.77	1.88172	1399.64	1.54326
1803	21636	48636	13.51	6.01	15.01	35.5642	54.6828	26.1218	28.0625	1.08028	995.963	1007.34	0.19822	4183.35	29.7873	639.93	0.676977	1732.87	0.022127	1608.29	1609.35	1.88082	1399.75	1.54792
1804	21648	48648	13.5133	6.01333	15.0133	35.5614	54.6723	26.1229	28.0629	1.08031	995.963	1007.34	0.19822	4183.35	29.7876	639.652	0.676982	1732.13	0.022127	1607.63	1608.69	1.88006	1399.85	1.55259
1805	21660	48660	13.5167	6.01667	15.0167	35.5587	54.6607	26.124	28.0632	1.08035	995.962	1007.34	0.19822	4183.35	29.7879	639.374	0.676986	1731.39	0.022127	1606.89	1608.04	1.87918	1399.95	1.55726
1806	21672	48672	13.52	6.02	15.02	35.5556	54.6491	26.1251	28.0634	1.08039	995.962	1007.34	0.19822	4183.35	29.7882	639.095	0.676994	1730.65	0.022127	1606.17	1607.33	1.87835	1400.05	1.56192
1807	21684	48684	13.5233	6.02333	15.0233	35.5525	54.6372	26.1262	28.0637	1.08043	995.962	1007.34	0.19822	4183.35	29.7884	638.815	0.677001	1729.92	0.022127	1605.43	1606.62	1.87748	1400.15	1.56659
1808	21696	48696	13.5267	6.02667	15.0267	35.5493	54.6253	26.1272	28.0639	1.08047	995.961	1007.34	0.19822	4183.35	29.7887	638.535	0.67701	1729.18	0.022127	1604.7	1605.89	1.87662	1400.25	1.57126
1809	21708	48708	13.53	6.03	15.03	35.5461	54.6133	26.1283	28.0641	1.08051	995.961	1007.34	0.19822	4183.35	29.789	638.255	0.677018	1728.44	0.0221269	1603.95	1605.16	1.87575	1400.35	1.57593
1810	21720	48720	13.5333	6.03333	15.0333	35.5429	54.6012	26.1294	28.0643	1.08055	995.961	1007.34	0.19822	4183.35	29.7893	637.974	0.677026	1727.7	0.0221269	1603.21	1604.42	1.87489	1400.45	1.58059
1811	21732	48732	13.5367	6.03667	15.0367	35.5396	54.5892	26.1305	28.0644	1.08059	995.96	1007.34	0.19822	4183.35	29.7895	637.692	0.677035	1726.96	0.0221269	1602.47	1603.69	1.87401	1400.55	1.58526
1812	21744	48744	13.54	6.04	15.04	35.5364	54.577	26.1316	28.0646	1.08063	995.96	1007.34	0.19822	4183.35	29.7898	637.41	0.677043	1726.22	0.0221269	1601.72	1602.95	1.87314	1400.65	1.58993
1813	21756	48756	13.5433	6.04333	15.0433	35.5331	54.5649	26.1326	28.0648	1.08067	995.96	1007.34	0.19822	4183.35	29.79	637.127	0.677052	1725.47	0.0221269	1600.97	1602.21	1.87227	1400.74	1.5946
1814	21768	48768	13.5467	6.04667	15.0467	35.5298	54.5527	26.1337	28.065	1.08071	995.959	1007.34	0.19822	4183.34	29.7903	636.843	0.677061	1724.73	0.0221269	1600.23	1601.46	1.87139	1400.84	1.59927
1815	21780	48780	13.55	6.05	15.05	35.5265	54.5405	26.1347	28.0651	1.08075	995.959	1007.34	0.19822	4183.34	29.7905	636.56	0.677069	1723.98	0.0221269	1599.48	1600.72	1.87052	1400.94	1.60394
1816	21792	48792	13.5533	6.05333	15.0533	35.5232	54.5283	26.1358	28.0653	1.08079	995.959	1007.33	0.19822	4183.34	29.7907	636.275	0.677078	1723.23	0.0221269	1598.72	1599.98	1.86964	1401.03	1.60861
1817	21804	48804	13.5567	6.05667	15.0567	35.5198	54.516	26.1368	28.0654	1.08083	995.958	1007.33	0.19822	4183.34	29.791	635.99	0.677087	1722.48	0.0221269	1597.97	1599.23	1.86876	1401.13	1.61328
1818	21816	48816	13.56	6.06	15.06	35.5165	54.5037	26.1379	28.0656	1.08087	995.958	1007.33	0.19822	4183.34	29.7912	635.704	0.677095	1721.73	0.0221269	1597.22	1598.48	1.86787	1401.23	1.61795
1819	21828	48828	13.5633	6.06333	15.0633	35.5131	54.4913	26.1389	28.0657	1.08091	995.958	1007.33	0.19822	4183.34	29.7914	635.418	0.677104	1720.98	0.0221269	1596.46	1597.73	1.86699	1401.32	1.62262
1820	21840	48840	13.5667	6.06667	15.0667	35.5098	54.479	26.1399	28.0658	1.08095	995.957	1007.33	0.19822	4183.34	29.7916	635.131	0.677113	1720.22	0.0221269	1595.7	1596.98	1.8661	1401.42	1.62729
1821	21852	48852	13.57	6.07	15.07	35.5064	54.4666	26.141	28.0659	1.08099	995.957	1007.33	0.19822	4183.34	29.7918	634.844	0.677122	1719.47	0.0221269	1594.94	1596.23	1.86521	1401.51	1.63197
1822	21864	48864	13.5733	6.07333	15.0733	35.503	54.4541	26.142	28.066	1.08103	995.957	1007.33	0.19822	4183.34	29.792	634.556	0.67713	1718.71	0.0221268	1594.18	1595.47	1.86433	1401.6	1.63664
1823	21876	48876	13.5767	6.07667	15.0767	35.4996	54.4417	26.143	28.0662	1.08108	995.956	1007.33	0.19822	4183.34	29.7922	634.267	0.677139	1717.95	0.0221268	1593.42	1594.72	1.86343	1401.7	1.64131
1824	21888	48888	13.58	6.08	15.08	35.4961	54.4292	26.144	28.0663	1.08112	995.956	1007.33	0.19822	4183.34	29.7924	633.978	0.677148	1717.19	0.0221268	1592.66	1593.96	1.86254	1401.79	1.64598
1825	21900	48900	13.5833	6.08333	15.0833	35.4927	54.4167	26.145	28.0663	1.08116	995.956	1007.33	0.19822	4183.34	29.7925	633.689	0.677157	1716.43	0.0221268	1591.89	1593.2	1.86165	1401.88	1.65066
1826	21912	48912	13.5867	6.08667	15.0867	35.4893	54.4041	26.146	28.0664	1.0812	995.956	1007.33	0.19822	4183.34	29.7927	633.399	0.677166	1715.66	0.0221268	1591.12	1592.44	1.86075	1401.98	1.65533
1827	21924	48924	13.59	6.09	15.09	35.4858	54.3916	26.147	28.0665	1.08124	995.955	1007.33	0.19822	4183.34	29.7929	633.108	0.677175	1714.9	0.0221268	1590.36	1591.68	1.85985	1402.07	1.66
1828	21936	48936	13.5933	6.09333	15.0933	35.4823	54.3789	26.148	28.0666	1.08128	995.955	1007.33	0.19822	4183.34	29.793	632.816	0.677184	1714.13	0.0221268	1589.59	1590.92	1.85895	1402.16	1.66468
1829	21948	48948	13.5967	6.09667	15.0967	35.4788	54.3663	26.149	28.0666	1.08133	995.955	1007.33	0.19822	4183.34	29.7932	632.525	0.677193	1713.36	0.0221268	1588.82	1590.15	1.85805	1402.25	1.66935
1830	21960	48960	13.6	6.1	15.1	35.4753	54.3536	26.15	28.0667	1.08137	995.954	1007.33	0.19822	4183.34	29.7933	632.232	0.677202	1712.6	0.0221268	1588.04	1589.39	1.85715	1402.34	1.67402
1831	21972	48972	13.6033	6.10333	15.1033	35.4718	54.3409	26.151	28.0668	1.08141	995.954	1007.32	0.19822	4183.34	29.7935	631.939	0.677211	1711.82	0.0221268	1587.27	1588.62	1.85624	1402.43	1.6787
1832	21984	48984	13.6067	6.10667	15.1067	35.4683	54.3282	26.1519	28.0668	1.08145	995.954	1007.32	0.19822	4183.34	29.7936	631.646	0.67722	1711.05	0.0221268	1586.5	1587.85	1.85534	1402.52	1.68337
1833	21996	48996	13.61	6.11	15.11	35.4648	54.3154	26.1529	28.0668	1.0815	995.953	1007.32	0.19822	4183.33	29.7938	631.352	0.677229	1710.28	0.0221268	1585.72	1587.08	1.85443	1402.61	1.68805
1834	22008	49008	13.6133	6.11333	15.1133	35.4612	54.3027	26.1539	28.0669	1.08154	995.953	1007.32	0.19822	4183.33	29.7939	631.057	0.677238	1709.5	0.0221268	1584.94	1586.31	1.85352	1402.7	1.69273
1835	22020	49020	13.6167	6.11667	15.1167	35.4576	54.2898	26.1548	28.0669	1.08158	995.953	1007.32	0.19822	4183.33	29.794	630.762	0.677248	1708.73	0.0221268	1584.16	1585.54	1.85261	1402.78	1.6974
1836	22032	49032	13.62	6.12	15.12	35.4541	54.277	26.1558	28.0669	1.08162	995.952	1007.32	0.19822	4183.33	29.7941	630.466	0.677257	1707.95	0.0221268	1583.38	1584.76	1.85169	1402.87	1.70208
1837	22044	49044	13.6233	6.12333	15.1233	35.4505	54.2641	26.1567	28.0669	1.08167	995.952	1007.32	0.19822	4183.33	29.7942	630.169	0.677266	1707.17	0.0221267	1582.6	1583.99	1.85078	1402.96	1.70675
1838	22056	49056	13.6267	6.12667	15.1267	35.4469	54.2512	26.1577	28.0669	1.08171	995.952	1007.32	0.19822	4183.33	29.7943	629.873	0.677275	1706.39	0.0221267	1581.81	1583.21	1.84986	1403.05	1.71143
1839	22068	49068	13.63	6.13	15.13	35.4432	54.2382	26.1586	28.0669	1.08175	995.952	1007.32	0.19822	4183.33	29.7944	629.575	0.677285	1705.61	0.0221267	1581.03	1582.43	1.84894	1403.13	1.71611
1840	22080	49080	13.6333	6.13333	15.1333	35.4396	54.2253	26.1595	28.0669	1.08179	995.951	1007.32	0.19822	4183.33	29.7945	629.277	0.677294	1704.82	0.0221267	1580.24	1581.65	1.84802	1403.22	1.72079
1841	22092	49092	13.6367	6.13667	15.1367	35.436	54.2123	26.1605	28.0669	1.08184	995.951	1007.32	0.19822	4183.33	29.7946	628.978	0.677303	1704.04	0.0221267	1579.45	1580.87	1.8471	1403.3	1.72546
1842	22104	49104	13.64	6.14	15.14	35.4323	54.1992	26.1614	28.0669	1.08188	995.951	1007.32	0.19822	4183.33	29.7947	628.679	0.677312	1703.25	0.0221267	1578.66	1580.08	1.84618	1403.39	1.73014
1843	22116	49116	13.6433	6.14333	15.1433	35.4286	54.1862	26.1623	28.0669	1.08192	995.95	1007.32	0.19822	4183.33	29.7948	628.38	0.677322	1702.46	0.0221267	1577.87	1579.3	1.84525	1403.47	1.73482
1844	22128	49128	13.6467	6.14667	15.1467	35.425	54.1731	26.1632	28.0668	1.08197	995.95	1007.32	0.19822	4183.33	29.7948	628.079	0.677331	1701.67	0.0221267	1577.08	1578.51	1.84432	1403.56	1.7395
1845	22140	49140	13.65	6.15	15.15	35.4213	54.16	26.1641	28.0668	1.08201	995.95	1007.31	0.19822	4183.33	29.7949	627.779	0.677341	1700.88	0.0221267	1576.28	1577.73	1.84339	1403.64	1.74418
1846	22152	49152	13.6533	6.15333	15.1533	35.4176	54.1468	26.165	28.0667	1.08206	995.95	1007.31	0.19822	4183.33	29.7949	627.477	0.67735	1700.09	0.0221267	1575.49	1576.94	1.84246	1403.72	1.74886
1847	22164	49164	13.6567	6.15667	15.1567	35.4138	54.1336	26.1659	28.0667	1.0821	995.949	1007.31	0.19822	4183.33	29.795	627.175	0.67736	1699.29	0.0221267	1574.69	1576.15	1.84153	1403.81	1.75353
1848	22176	49176	13.66	6.16	15.16	35.4101	54.1204	26.1668	28.0666	1.08214	995.949	1007.31	0.19822	4183.33	29.795	626.873	0.677369	1698.5	0.0221267	1573.89	1575.35	1.8406	1403.89	1.75821
1849	22188	49188	13.6633	6.16333	15.1633	35.4064	54.1072	26.1677	28.0665	1.08219	995.949	1007.31	0.19822	4183.33	29.7951	626.57	0.677379	1697.7	0.0221267	1573.09	1574.56	1.83966	1403.97	1.76289
1850	22200	49200	13.6667	6.16667	15.1667	35.4026	54.0939	26.1686	28.0665	1.08223	995.948	1007.31	0.19822	4183.33	29.7951	626.266	0.677388	1696.9	0.0221267	1572.29	1573.77	1.83873	1404.05	1.76757
1851	22212	49212	13.67	6.17	15.17	35.3988	54.0806	26.1695	28.0664	1.08228	995.948	1007.31	0.19822	4183.33	29.7951	625.962	0.677398	1696.1	0.0221267	1571.49	1572.97	1.83779	1404.13	1.77225
1852	22224	49224	13.6733	6.17333	15.1733	35.3951	54.0673	26.1703	28.0663	1.08232	995.948	1007.31	0.19822	4183.33	29.7952	625.657	0.677407	1695.3	0.0221266	1570.68	1572.17	1.83685	1404.21	1.77694
1853	22236	49236	13.6767	6.17667	15.1767	35.3913	54.0539	26.1712	28.0662	1.08236	995.948	1007.31	0.19822	4183.32	29.7952	625.352	0.677417	1694.5	0.0221266	1569.88	1571.37	1.8359	1404.29	1.78162
1854	22248	49248	13.68	6.18	15.18	35.3875	54.0405	26.1721	28.0661	1.08241	995.947	1007.31	0.19822	4183.32	29.7952	625.046	0.677427	1693.69	0.0221266	1569.07	1570.57	1.83496	1404.37	1.7863
1855	22260	49260	13.6833	6.18333	15.1833	35.3836	54.0271	26.1729	28.066	1.08245	995.947	1007.31	0.19822	4183.32	29.7952	624.74	0.677437	1692.89	0.0221266	1568.26	1569.77	1.83401	1404.45	1.79098
1856	22272	49272	13.6867	6.18667	15.1867	35.3798	54.0137	26.1738	28.0659	1.0825	995.947	1007.31	0.19822	4183.32	29.7952	624.433	0.677446	1692.08	0.0221266	1567.45	1568.97	1.83307	1404.53	1.79566
1857	22284	49284	13.69	6.19	15.19	35.3759	54.0002	26.1746	28.0658	1.08254	995.947	1007.31	0.19822	4183.32	29.7952	624.125	0.677456	1691.27	0.0221266	1566.64	1568.16	1.83212	1404.61	1.80034
1858	22296	49296	13.6933	6.19333	15.1933	35.3721	53.9867	26.1755	28.0656	1.08259	995.946	1007.31	0.19822	4183.32	29.7952	623.817	0.677466	1690.46	0.0221266	1565.83	1567.36	1.83117	1404.68	1.80503
1859	22308	49308	13.6967	6.19667	15.1967	35.3682	53.9731	26.1763	28.0655	1.08263	995.946	1007.3	0.19822	4183.32	29.7951	623.509	0.677476	1689.65	0.0221266	1565.01	1566.55	1.83022	1404.76	1.80971
1860	22320	49320	13.7	6.2	15.2	35.3643	53.9596	26.1771	28.0653	1.08268	995.946	1007.3	0.19822	4183.32	29.7951	623.2	0.677485	1688.83	0.0221266	1564.2	1565.74	1.82926	1404.84	1.81439
1861	22332	49332	13.7033	6.20333	15.2033	35.3604	53.946	26.178	28.0652	1.08272	995.945	1007.3	0.19822	4183.32	29.7951	622.89	0.677495	1688.02	0.0221266	1563.38	1564.93	1.82831	1404.91	1.81907
1862	22344	49344	13.7067	6.20667	15.2067	35.3565	53.9323	26.1788	28.065	1.08277	995.945	1007.3	0.19822	4183.32	29.795	622.58	0.677505	1687.2	0.0221266	1562.56	1564.12	1.82735	1404.99	1.82376
1863	22356	49356	13.71	6.21	15.21	35.3526	53.9187	26.1796	28.0649	1.08281	995.945	1007.3	0.19822	4183.32	29.795	622.269	0.677515	1686.39	0.0221266	1561.74	1563.3	1.82639	1405.06	1.82844
1864	22368	49368	13.7133	6.21333	15.2133	35.3486	53.905	26.1804	28.0647	1.08286	995.945	1007.3	0.19822	4183.32	29.7949	621.957	0.677525	1685.57	0.0221266	1560.92	1562.49	1.82543	1405.14	1.83312
1865	22380	49380	13.7167	6.21667	15.2167	35.3447	53.8913	26.1812	28.0645	1.08291	995.944	1007.3	0.19822	4183.32	29.7949	621.646	0.677535	1684.75	0.0221266	1560.1	1561.67	1.82447	1405.21	1.83781
1866	22392	49392	13.72	6.22	15.22	35.3407	53.8775	26.182	28.0643	1.08295	995.944	1007.3	0.19822	4183.32	29.7948	621.333	0.677545	1683.92	0.0221266	1559.28	1560.86	1.8235	1405.29	1.84249
1867	22404	49404	13.7233	6.22333	15.2233	35.3368	53.8637	26.1828	28.0641	1.083	995.944	1007.3	0.19822	4183.32	29.7948	621.02	0.677555	1683.1	0.0221266	1558.45	1560.04	1.82254	1405.36	1.84718
1868	22416	49416	13.7267	6.22667	15.2267	35.3328	53.8499	26.1836	28.0639	1.08304	995.944	1007.3	0.19822	4183.32	29.7947	620.707	0.677565	1682.28	0.0221266	1557.62	1559.22	1.82157	1405.43	1.85186
1869	22428	49428	13.73	6.23	15.23	35.3288	53.8361	26.1844	28.0637	1.08309	995.943	1007.3	0.19822	4183.32	29.7946	620.392	0.677575	1681.45	0.0221265	1556.79	1558.4	1.8206	1405.5	1.85655
1870	22440	49440	13.7333	6.23333	15.2333	35.3247	53.8222	26.1852	28.0635	1.08314	995.943	1007.3	0.19822	4183.32	29.7945	620.078	0.677586	1680.62	0.0221265	1555.96	1557.57	1.81963	1405.58	1.86123
1871	22452	49452	13.7367	6.23667	15.2367	35.3207	53.8083	26.1859	28.0633	1.08318	995.943	1007.3	0.19822	4183.32	29.7944	619.763	0.677596	1679.79	0.0221265	1555.13	1556.75	1.81866	1405.65	1.86592
1872	22464	49464	13.74	6.24	15.24	35.3167	53.7944	26.1867	28.0631	1.08323	995.943	1007.3	0.19822	4183.32	29.7943	619.447	0.677606	1678.96	0.0221265	1554.3	1555.92	1.81769	1405.72	1.8706
1873	22476	49476	13.7433	6.24333	15.2433	35.3126	53.7804	26.1875	28.0629	1.08328	995.942	1007.29	0.19822	4183.32	29.7942	619.131	0.677616	1678.13	0.0221265	1553.47	1555.09	1.81671	1405.79	1.87529
1874	22488	49488	13.7467	6.24667	15.2467	35.3086	53.7665	26.1882	28.0626	1.08332	995.942	1007.29	0.19822	4183.32	29.7941	618.814	0.677626	1677.3	0.0221265	1552.63	1554.27	1.81573	1405.86	1.87998
1875	22500	49500	13.75	6.25	15.25	35.3045	53.7524	26.189	28.0624	1.08337	995.942	1007.29	0.19822	4183.32	29.794	618.496	0.677637	1676.46	0.0221265	1551.79	1553.43	1.81475	1405.93	1.88466
1876	22512	49512	13.7533	6.25333	15.2533	35.3004	53.7384	26.1897	28.0621	1.08342	995.942	1007.29	0.19822	4183.31	29.7939	618.178	0.677647	1675.63	0.0221265	1550.96	1552.6	1.81377	1406	1.88935
1877	22524	49524	13.7567	6.25667	15.2567	35.2963	53.7243	26.1905	28.0619	1.08346	995.942	1007.29	0.19822	4183.31	29.7938	617.86	0.677657	1674.79	0.0221265	1550.12	1551.77	1.81279	1406.06	1.89404
1878	22536	49536	13.76	6.26	15.26	35.2922	53.7102	26.1912	28.0616	1.08351	995.941	1007.29	0.19822	4183.31	29.7936	617.541	0.677668	1673.95	0.0221265	1549.28	1550.94	1.81181	1406.13	1.89872
1879	22548	49548	13.7633	6.26333	15.2633	35.288	53.6961	26.192	28.0613	1.08356	995.941	1007.29	0.19822	4183.31	29.7935	617.221	0.677678	1673.11	0.0221265	1548.43	1550.1	1.81082	1406.2	1.90341
1880	22560	49560	13.7667	6.26667	15.2667	35.2839	53.6819	26.1927	28.061	1.0836	995.941	1007.29	0.19822	4183.31	29.7934	616.901	0.677688	1672.27	0.0221265	1547.59	1549.26	1.80984	1406.27	1.9081
1881	22572	49572	13.77	6.27	15.27	35.2797	53.6677	26.1934	28.0608	1.08365	995.941	1007.29	0.19822	4183.31	29.7932	616.58	0.677699	1671.42	0.0221265	1546.74	1548.42	1.80885	1406.33	1.91279
1882	22584	49584	13.7733	6.27333	15.2733	35.2756	53.6535	26.1941	28.0605	1.0837	995.94	1007.29	0.19822	4183.31	29.7931	616.259	0.677709	1670.58	0.0221265	1545.9	1547.58	1.80786	1406.4	1.91747
1883	22596	49596	13.7767	6.27667	15.2767	35.2714	53.6393	26.1949	28.0602	1.08375	995.94	1007.29	0.19822	4183.31	29.7929	615.938	0.67772	1669.73	0.0221265	1545.05	1546.74	1.80687	1406.47	1.92216
1884	22608	49608	13.78	6.28	15.28	35.2672	53.625	26.1956	28.0599	1.08379	995.94	1007.29	0.19822	4183.31	29.7927	615.615	0.67773	1668.88	0.0221265	1544.2	1545.9	1.80587	1406.53	1.92685
1885	22620	49620	13.7833	6.28333	15.2833	35.263	53.6107	26.1963	28.0595	1.08384	995.94	1007.29	0.19822	4183.31	29.7926	615.292	0.677741	1668.04	0.0221265	1543.35	1545.06	1.80488	1406.59	1.93154
1886	22632	49632	13.7867	6.28667	15.2867	35.2588	53.5963	26.197	28.0592	1.08389	995.94	1007.28	0.19822	4183.31	29.7924	614.969	0.677752	1667.19	0.0221265	1542.5	1544.21	1.80388	1406.66	1.93623
1887	22644	49644	13.79	6.29	15.29	35.2545	53.582	26.1977	28.0589	1.08394	995.939	1007.28	0.19822	4183.31	29.7922	614.645	0.677762	1666.33	0.0221265	1541.64	1543.36	1.80288	1406.72	1.94092
1888	22656	49656	13.7933	6.29333	15.2933	35.2503	53.5676	26.1983	28.0586	1.08398	995.939	1007.28	0.19822	4183.31	29.792	614.321	0.677773	1665.48	0.0221265	1540.79	1542.51	1.80188	1406.79	1.94561
1889	22668	49668	13.7967	6.29667	15.2967	35.246	53.5531	26.199	28.0582	1.08403	995.939	1007.28	0.19822	4183.31	29.7918	613.996	0.677784	1664.62	0.0221264	1539.93	1541.67	1.80088	1406.85	1.9503
1890	22680	49680	13.8	6.3	15.3	35.2417	53.5387	26.1997	28.0579	1.08408	995.939	1007.28	0.19822	4183.31	29.7916	613.67	0.677794	1663.77	0.0221264	1539.07	1540.81	1.79988	1406.91	1.95499
1891	22692	49692	13.8033	6.30333	15.3033	35.2375	53.5242	26.2004	28.0575	1.08413	995.938	1007.28	0.19822	4183.31	29.7914	613.344	0.677805	1662.91	0.0221264	1538.21	1539.96	1.79887	1406.97	1.95968
1892	22704	49704	13.8067	6.30667	15.3067	35.2332	53.5097	26.201	28.0571	1.08418	995.938	1007.28	0.19822	4183.31	29.7912	613.017	0.677816	1662.05	0.0221264	1537.35	1539.11	1.79787	1407.03	1.96437
1893	22716	49716	13.81	6.31	15.31	35.2289	53.4951	26.2017	28.0568	1.08423	995.938	1007.28	0.19822	4183.31	29.791	612.69	0.677827	1661.19	0.0221264	1536.49	1538.25	1.79686	1407.09	1.96906
1894	22728	49728	13.8133	6.31333	15.3133	35.2245	53.4806	26.2024	28.0564	1.08428	995.938	1007.28	0.19822	4183.31	29.7907	612.362	0.677838	1660.33	0.0221264	1535.63	1537.4	1.79585	1407.16	1.97375
1895	22740	49740	13.8167	6.31667	15.3167	35.2202	53.466	26.203	28.056	1.08432	995.938	1007.28	0.19822	4183.31	29.7905	612.034	0.677849	1659.47	0.0221264	1534.76	1536.54	1.79484	1407.21	1.97844
1896	22752	49752	13.82	6.32	15.32	35.2158	53.4513	26.2037	28.0556	1.08437	995.937	1007.28	0.19822	4183.31	29.7903	611.705	0.677859	1658.6	0.0221264	1533.9	1535.68	1.79383	1407.27	1.98313
1897	22764	49764	13.8233	6.32333	15.3233	35.2115	53.4367	26.2043	28.0552	1.08442	995.937	1007.28	0.19822	4183.31	29.79	611.376	0.67787	1657.73	0.0221264	1533.03	1534.82	1.79281	1407.33	1.98782
1898	22776	49776	13.8267	6.32667	15.3267	35.2071	53.422	26.2049	28.0548	1.08447	995.937	1007.28	0.19822	4183.31	29.7898	611.046	0.677881	1656.87	0.0221264	1532.16	1533.96	1.79179	1407.39	1.99251
1899	22788	49788	13.83	6.33	15.33	35.2027	53.4073	26.2056	28.0544	1.08452	995.937	1007.28	0.19822	4183.31	29.7895	610.715	0.677892	1656	0.0221264	1531.29	1533.09	1.79078	1407.45	1.9972
1900	22800	49800	13.8333	6.33333	15.3333	35.1983	53.3925	26.2062	28.054	1.08457	995.937	1007.27	0.19822	4183.31	29.7893	610.385	0.677903	1655.13	0.0221264	1530.42	1532.23	1.78976	1407.51	2.00189
1901	22812	49812	13.8367	6.33667	15.3367	35.1939	53.3778	26.2068	28.0536	1.08462	995.936	1007.27	0.19822	4183.31	29.789	610.053	0.677915	1654.26	0.0221264	1529.55	1531.36	1.78874	1407.56	2.00659
1902	22824	49824	13.84	6.34	15.34	35.1895	53.3629	26.2074	28.0531	1.08467	995.936	1007.27	0.19822	4183.31	29.7887	609.721	0.677926	1653.38	0.0221264	1528.67	1530.49	1.78771	1407.62	2.01128
1903	22836	49836	13.8433	6.34333	15.3433	35.185	53.3481	26.208	28.0527	1.08472	995.936	1007.27	0.19822	4183.31	29.7885	609.388	0.677937	1652.51	0.0221264	1527.8	1529.62	1.78669	1407.68	2.01597
1904	22848	49848	13.8467	6.34667	15.3467	35.1806	53.3332	26.2086	28.0522	1.08477	995.936	1007.27	0.19822	4183.3	29.7882	609.055	0.677948	1651.63	0.0221264	1526.92	1528.75	1.78566	1407.73	2.02066
1905	22860	49860	13.85	6.35	15.35	35.1761	53.3184	26.2092	28.0518	1.08482	995.936	1007.27	0.19822	4183.3	29.7879	608.722	0.677959	1650.75	0.0221264	1526.04	1527.88	1.78464	1407.79	2.02535
1906	22872	49872	13.8533	6.35333	15.3533	35.1717	53.3034	26.2098	28.0513	1.08487	995.935	1007.27	0.19822	4183.3	29.7876	608.387	0.67797	1649.87	0.0221264	1525.16	1527.01	1.78361	1407.84	2.03005
1907	22884	49884	13.8567	6.35667	15.3567	35.1672	53.2885	26.2104	28.0509	1.08492	995.935	1007.27	0.19822	4183.3	29.7873	608.053	0.677982	1648.99	0.0221264	1524.28	1526.14	1.78258	1407.89	2.03474
1908	22896	49896	13.86	6.36	15.36	35.1627	53.2735	26.211	28.0504	1.08497	995.935	1007.27	0.19822	4183.3	29.787	607.717	0.677993	1648.11	0.0221264	1523.4	1525.26	1.78155	1407.95	2.03943
1909	22908	49908	13.8633	6.36333	15.3633	35.1581	53.2585	26.2116	28.0499	1.08502	995.935	1007.27	0.19822	4183.3	29.7867	607.382	0.678004	1647.23	0.0221264	1522.51	1524.38	1.78051	1408	2.04413
1910	22920	49920	13.8667	6.36667	15.3667	35.1536	53.2435	26.2121	28.0494	1.08507	995.935	1007.27	0.19822	4183.3	29.7863	607.045	0.678016	1646.34	0.0221264	1521.63	1523.5	1.77948	1408.05	2.04882
1911	22932	49932	13.87	6.37	15.37	35.1491	53.2284	26.2127	28.0489	1.08512	995.935	1007.27	0.19822	4183.3	29.786	606.708	0.678027	1645.46	0.0221264	1520.74	1522.62	1.77844	1408.11	2.05351
1912	22944	49944	13.8733	6.37333	15.3733	35.1445	53.2133	26.2133	28.0484	1.08517	995.934	1007.26	0.19822	4183.3	29.7857	606.371	0.678039	1644.57	0.0221263	1519.85	1521.74	1.7774	1408.16	2.05821
1913	22956	49956	13.8767	6.37667	15.3767	35.14	53.1982	26.2138	28.0479	1.08522	995.934	1007.26	0.19822	4183.3	29.7854	606.033	0.67805	1643.68	0.0221263	1518.97	1520.86	1.77636	1408.21	2.0629
1914	22968	49968	13.88	6.38	15.38	35.1354	53.183	26.2144	28.0474	1.08527	995.934	1007.26	0.19822	4183.3	29.785	605.694	0.678062	1642.79	0.0221263	1518.07	1519.98	1.77532	1408.26	2.0676
1915	22980	49980	13.8833	6.38333	15.3833	35.1308	53.1678	26.2149	28.0469	1.08532	995.934	1007.26	0.19822	4183.3	29.7847	605.355	0.678073	1641.9	0.0221263	1517.18	1519.09	1.77428	1408.31	2.07229
1916	22992	49992	13.8867	6.38667	15.3867	35.1262	53.1526	26.2154	28.0463	1.08537	995.934	1007.26	0.19822	4183.3	29.7843	605.016	0.678085	1641.01	0.0221263	1516.29	1518.2	1.77323	1408.36	2.07698
1917	23004	50004	13.89	6.39	15.39	35.1216	53.1374	26.216	28.0458	1.08542	995.934	1007.26	0.19822	4183.3	29.784	604.676	0.678096	1640.11	0.0221263	1515.39	1517.32	1.77219	1408.41	2.08168
1918	23016	50016	13.8933	6.39333	15.3933	35.1169	53.1221	26.2165	28.0453	1.08547	995.933	1007.26	0.19822	4183.3	29.7836	604.335	0.678108	1639.22	0.0221263	1514.5	1516.43	1.77114	1408.46	2.08637
1919	23028	50028	13.8967	6.39667	15.3967	35.1123	53.1068	26.217	28.0447	1.08552	995.933	1007.26	0.19822	4183.3	29.7832	603.994	0.67812	1638.32	0.0221263	1513.6	1515.54	1.77009	1408.5	2.09107
1920	23040	50040	13.9	6.4	15.4	35.1076	53.0915	26.2176	28.0442	1.08557	995.933	1007.26	0.19822	4183.3	29.7828	603.652	0.678131	1637.42	0.0221263	1512.7	1514.64	1.76904	1408.55	2.09576
1921	23052	50052	13.9033	6.40333	15.4033	35.103	53.0761	26.2181	28.0436	1.08563	995.933	1007.26	0.19822	4183.3	29.7825	603.31	0.678143	1636.52	0.0221263	1511.8	1513.75	1.76799	1408.6	2.10046
1922	23064	50064	13.9067	6.40667	15.4067	35.0983	53.0608	26.2186	28.043	1.08568	995.933	1007.26	0.19822	4183.3	29.7821	602.967	0.678155	1635.62	0.0221263	1510.9	1512.86	1.76693	1408.65	2.10516
1923	23076	50076	13.91	6.41	15.41	35.0936	53.0454	26.2191	28.0424	1.08573	995.933	1007.26	0.19822	4183.3	29.7817	602.624	0.678167	1634.72	0.0221263	1510	1511.96	1.76588	1408.69	2.10985
1924	23088	50088	13.9133	6.41333	15.4133	35.0889	53.0299	26.2196	28.0419	1.08578	995.932	1007.26	0.19822	4183.3	29.7813	602.28	0.678178	1633.81	0.0221263	1509.09	1511.06	1.76482	1408.74	2.11455
1925	23100	50100	13.9167	6.41667	15.4167	35.0842	53.0144	26.2201	28.0413	1.08583	995.932	1007.25	0.19822	4183.3	29.7809	601.936	0.67819	1632.91	0.0221263	1508.19	1510.16	1.76376	1408.78	2.11924
1926	23112	50112	13.92	6.42	15.42	35.0794	52.9989	26.2205	28.0407	1.08588	995.932	1007.25	0.19822	4183.3	29.7805	601.591	0.678202	1632	0.0221263	1507.28	1509.26	1.7627	1408.83	2.12394
1927	23124	50124	13.9233	6.42333	15.4233	35.0747	52.9834	26.221	28.0401	1.08594	995.932	1007.25	0.19822	4183.3	29.78	601.246	0.678214	1631.09	0.0221263	1506.37	1508.36	1.76164	1408.87	2.12864
1928	23136	50136	13.9267	6.42667	15.4267	35.0699	52.9679	26.2215	28.0394	1.08599	995.932	1007.25	0.19822	4183.3	29.7796	600.9	0.678226	1630.18	0.0221263	1505.46	1507.46	1.76057	1408.91	2.13333
1929	23148	50148	13.93	6.43	15.43	35.0652	52.9523	26.222	28.0388	1.08604	995.932	1007.25	0.19822	4183.3	29.7792	600.553	0.678238	1629.27	0.0221263	1504.55	1506.56	1.75951	1408.96	2.13803
1930	23160	50160	13.9333	6.43333	15.4333	35.0604	52.9367	26.2224	28.0382	1.08609	995.931	1007.25	0.19822	4183.3	29.7788	600.206	0.67825	1628.36	0.0221263	1503.64	1505.65	1.75844	1409	2.14272
1931	23172	50172	13.9367	6.43667	15.4367	35.0556	52.921	26.2229	28.0376	1.08615	995.931	1007.25	0.19822	4183.3	29.7783	599.859	0.678262	1627.45	0.0221263	1502.73	1504.74	1.75737	1409.04	2.14742
1932	23184	50184	13.94	6.44	15.44	35.0508	52.9054	26.2233	28.0369	1.0862	995.931	1007.25	0.19822	4183.3	29.7779	599.511	0.678274	1626.53	0.0221263	1501.81	1503.84	1.7563	1409.08	2.15212
1933	23196	50196	13.9433	6.44333	15.4433	35.046	52.8897	26.2238	28.0363	1.08625	995.931	1007.25	0.19822	4183.3	29.7774	599.162	0.678286	1625.61	0.0221263	1500.9	1502.93	1.75523	1409.13	2.15682
1934	23208	50208	13.9467	6.44667	15.4467	35.0411	52.8739	26.2242	28.0356	1.0863	995.931	1007.25	0.19822	4183.3	29.777	598.813	0.678299	1624.7	0.0221263	1499.98	1502.02	1.75416	1409.17	2.16151
1935	23220	50220	13.95	6.45	15.45	35.0363	52.8582	26.2247	28.0349	1.08636	995.931	1007.25	0.19822	4183.3	29.7765	598.463	0.678311	1623.78	0.0221263	1499.06	1501.11	1.75309	1409.21	2.16621
1936	23232	50232	13.9533	6.45333	15.4533	35.0314	52.8424	26.2251	28.0343	1.08641	995.931	1007.25	0.19822	4183.3	29.776	598.113	0.678323	1622.86	0.0221263	1498.14	1500.19	1.75201	1409.25	2.17091
1937	23244	50244	13.9567	6.45667	15.4567	35.0266	52.8266	26.2255	28.0336	1.08646	995.931	1007.24	0.19822	4183.3	29.7755	597.763	0.678335	1621.93	0.0221263	1497.22	1499.28	1.75093	1409.28	2.17561
1938	23256	50256	13.96	6.46	15.46	35.0217	52.8108	26.2259	28.0329	1.08651	995.93	1007.24	0.19822	4183.3	29.7751	597.411	0.678348	1621.01	0.0221263	1496.3	1498.36	1.74985	1409.32	2.1803
1939	23268	50268	13.9633	6.46333	15.4633	35.0168	52.7949	26.2264	28.0322	1.08657	995.93	1007.24	0.19822	4183.3	29.7746	597.06	0.67836	1620.09	0.0221263	1495.37	1497.44	1.74877	1409.36	2.185
1940	23280	50280	13.9667	6.46667	15.4667	35.0119	52.779	26.2268	28.0315	1.08662	995.93	1007.24	0.19822	4183.3	29.7741	596.707	0.678372	1619.16	0.0221263	1494.45	1496.53	1.74769	1409.4	2.1897
1941	23292	50292	13.97	6.47	15.47	35.0069	52.7631	26.2272	28.0308	1.08667	995.93	1007.24	0.19822	4183.29	29.7736	596.355	0.678385	1618.23	0.0221262	1493.52	1495.61	1.74661	1409.44	2.1944
1942	23304	50304	13.9733	6.47333	15.4733	35.002	52.7471	26.2276	28.0301	1.08673	995.93	1007.24	0.19822	4183.29	29.7731	596.001	0.678397	1617.3	0.0221262	1492.59	1494.68	1.74552	1409.47	2.1991
1943	23316	50316	13.9767	6.47667	15.4767	34.9971	52.7311	26.228	28.0294	1.08678	995.93	1007.24	0.19822	4183.29	29.7726	595.648	0.67841	1616.37	0.0221262	1491.66	1493.76	1.74444	1409.51	2.20379
1944	23328	50328	13.98	6.48	15.48	34.9921	52.7151	26.2283	28.0287	1.08683	995.93	1007.24	0.19822	4183.29	29.772	595.293	0.678422	1615.44	0.0221262	1490.73	1492.84	1.74335	1409.54	2.20849
1945	23340	50340	13.9833	6.48333	15.4833	34.9871	52.6991	26.2287	28.0279	1.08689	995.93	1007.24	0.19822	4183.29	29.7715	594.938	0.678435	1614.51	0.0221262	1489.8	1491.91	1.74226	1409.58	2.21319
1946	23352	50352	13.9867	6.48667	15.4867	34.9821	52.683	26.2291	28.0272	1.08694	995.929	1007.24	0.19822	4183.29	29.771	594.583	0.678448	1613.57	0.0221262	1488.87	1490.99	1.74117	1409.61	2.21789
1947	23364	50364	13.99	6.49	15.49	34.9771	52.6669	26.2295	28.0264	1.087	995.929	1007.24	0.19822	4183.29	29.7705	594.227	0.67846	1612.64	0.0221262	1487.93	1490.06	1.74007	1409.65	2.22259
1948	23376	50376	13.9933	6.49333	15.4933	34.9721	52.6508	26.2298	28.0257	1.08705	995.929	1007.24	0.19822	4183.29	29.7699	593.871	0.678473	1611.7	0.0221262	1487	1489.13	1.73898	1409.68	2.22729
1949	23388	50388	13.9967	6.49667	15.4967	34.9671	52.6347	26.2302	28.0249	1.0871	995.929	1007.23	0.19822	4183.29	29.7694	593.514	0.678486	1610.76	0.0221262	1486.06	1488.2	1.73788	1409.71	2.23199
1950	23400	50400	14	6.5	15.5	34.9621	52.6185	26.2305	28.0241	1.08716	995.929	1007.23	0.19822	4183.29	29.7688	593.156	0.678498	1609.82	0	1485.12	1487.27	1.73679	0	2.23199
1951	23412	50412	14.0033	6.50333	15.5033	34.957	52.6023	26.239	28.0234	1.08721	995.926	1007.23	0.19822	4183.29	29.7683	592.798	0.678511	1608.88	0	1484.18	1479.63	1.73569	0	2.23199
1952	23424	50424	14.0067	6.50667	15.5067	34.957	52.586	26.2474	28.0302	1.08727	995.924	1007.23	0.19822	4183.28	29.7677	592.44	0.678477	1607.83	0	1482.82	1478.3	1.73409	0	2.23199
1953	23436	50436	14.01	6.51	15.51	34.9569	52.5739	26.2558	28.0369	1.08731	995.921	1007.23	0.19822	4183.28	29.7671	592.081	0.678443	1606.77	0	1481.81	1476.95	1.73291	0	2.23199
1954	23448	50448	14.0133	6.51333	15.5133	34.9581	52.5616	26.2641	28.0439	1.08735	995.918	1007.23	0.19822	4183.28	29.7666	591.721	0.678396	1605.68	0	1480.66	1475.83	1.73157	0	2.23199
1955	23460	50460	14.0167	6.51667	15.5167	34.9593	52.5504	26.2725	28.0509	1.08739	995.916	1007.23	0.19822	4183.27	29.766	591.361	0.67835	1604.6	0	1479.62	1474.7	1.73035	0	2.23199
1956	23472	50472	14.02	6.52	15.52	34.9609	52.5391	26.2809	28.058	1.08743	995.913	1007.23	0.19822	4183.27	29.7654	591	0.6783	1603.5	0	1478.54	1473.63	1.72908	0	2.23199
1957	23484	50484	14.0233	6.52333	15.5233	34.9624	52.528	26.2892	28.0651	1.08746	995.91	1007.23	0.19822	4183.26	29.7648	590.639	0.67825	1602.4	0	1477.48	1472.55	1.72785	0	2.23199
1958	23496	50496	14.0267	6.52667	15.5267	34.964	52.5169	26.2976	28.0722	1.0875	995.908	1007.23	0.19822	4183.26	29.7642	590.278	0.6782	1601.3	0	1476.41	1471.49	1.7266	0	2.23199
1959	23508	50508	14.03	6.53	15.53	34.9656	52.5059	26.3059	28.0792	1.08754	995.905	1007.23	0.19822	4183.25	29.7636	589.915	0.678149	1600.2	0	1475.35	1470.43	1.72535	0	2.23199
1960	23520	50520	14.0333	6.53333	15.5333	34.9671	52.4948	26.3143	28.0863	1.08757	995.903	1007.23	0.19822	4183.25	29.763	589.553	0.678098	1599.1	0	1474.28	1469.37	1.72411	0	2.23199
1961	23532	50532	14.0367	6.53667	15.5367	34.9687	52.4837	26.3226	28.0933	1.08761	995.9	1007.23	0.19822	4183.24	29.7624	589.189	0.678047	1597.99	0	1473.22	1468.31	1.72286	0	2.23199
1962	23544	50544	14.04	6.54	15.54	34.9703	52.4726	26.3309	28.1004	1.08765	995.897	1007.23	0.19822	4183.24	29.7617	588.826	0.677996	1596.89	0	1472.15	1467.25	1.72161	0	2.23199
1963	23556	50556	14.0433	6.54333	15.5433	34.9718	52.4614	26.3392	28.1074	1.08769	995.895	1007.23	0.19822	4183.24	29.7611	588.462	0.677945	1595.78	0	1471.08	1466.19	1.72036	0	2.23199
1964	23568	50568	14.0467	6.54667	15.5467	34.9734	52.4502	26.3476	28.1145	1.08772	995.892	1007.22	0.19822	4183.23	29.7605	588.097	0.677894	1594.67	0	1470.01	1465.12	1.71911	0	2.23199
1965	23580	50580	14.05	6.55	15.55	34.9749	52.439	26.3559	28.1215	1.08776	995.889	1007.22	0.19822	4183.23	29.7598	587.732	0.677843	1593.56	0	1468.94	1464.06	1.71785	0	2.23199
1966	23592	50592	14.0533	6.55333	15.5533	34.9764	52.4278	26.3642	28.1285	1.0878	995.887	1007.22	0.19822	4183.22	29.7592	587.366	0.677792	1592.45	0	1467.86	1462.99	1.7166	0	2.23199
1967	23604	50604	14.0567	6.55667	15.5567	34.9779	52.4165	26.3725	28.1355	1.08784	995.884	1007.22	0.19822	4183.22	29.7585	587	0.677741	1591.33	0	1466.79	1461.93	1.71534	0	2.23199
1968	23616	50616	14.06	6.56	15.56	34.9794	52.4052	26.3808	28.1425	1.08787	995.882	1007.22	0.19822	4183.21	29.7579	586.633	0.67769	1590.22	0	1465.71	1460.86	1.71409	0	2.23199
1969	23628	50628	14.0633	6.56333	15.5633	34.9809	52.3939	26.389	28.1495	1.08791	995.879	1007.22	0.19822	4183.21	29.7572	586.265	0.677638	1589.1	0	1464.64	1459.79	1.71283	0	2.23199
1970	23640	50640	14.0667	6.56667	15.5667	34.9824	52.3826	26.3973	28.1565	1.08795	995.876	1007.22	0.19822	4183.2	29.7565	585.898	0.677587	1587.99	0	1463.56	1458.72	1.71157	0	2.23199
1971	23652	50652	14.07	6.57	15.57	34.9838	52.3712	26.4056	28.1635	1.08799	995.874	1007.22	0.19822	4183.2	29.7559	585.529	0.677536	1586.87	0	1462.48	1457.64	1.7103	0	2.23199
1972	23664	50664	14.0733	6.57333	15.5733	34.9853	52.3598	26.4138	28.1705	1.08803	995.871	1007.22	0.19822	4183.2	29.7552	585.16	0.677484	1585.75	0	1461.4	1456.57	1.70904	0	2.23199
[truncated: 2,528 more rows]

## Sheet: Config II
Curves of efficiency		-321.09	-418.59	-556.2	-556.2
		50.328	63.579	72.719	72.719
		100	200	300																	CORRECTION
					DRY BULB AIR TEMPERATURE											IRRADIATION (HORIZONTAL)					slope=42°	Dawn time
DEMAND	1	MONTH		Tap water temp	c5	c4	c3	c2	c1	c0						d4	d3	d2	d1	d0	f	h
	1.333	Va - MAY	1	11	3.14308e-05	-0.00100426	-0.0124785	0.594461	-3.71298	20.8151					0.3463	0.221445	-10.6294	161.55	-815.944	1038.51	0.958	7
L/MIN	1.333	Va - JUN	2	12	2.77409e-05	-0.000754318	-0.0183027	0.646023	-3.81345	22.3254					10.641	0.14594	-7.00513	100.484	-394.145	273.017	0.924	5
		Va - JUL	3	13	3.25756e-05	-0.00104393	-0.0124088	0.602241	-3.7632	23.8747					18.786	0.180986	-8.68735	129.05	-595.255	736.429	0.958	5
		Va - AGO	4	12	5.05769e-05	-0.00218854	0.012559	0.398284	-3.40353	24.7229					10.842	0.26618	-12.7766	203.444	-1202.99	2417.54	1.068	6
		Va - SEP	5	11	6.40747e-05	-0.00305527	0.0322251	0.221284	-2.9446	23.4613					16.475	0.221445	-10.6294	161.55	-815.944	1038.51	1.236	7
			1
					RESULTS - SAVINGS (NO CIRCULATION DEVICES)
delta t	12						Config_2	Config_1		Tdep (22h)						29.7778	C
dens. Air	1.0021				Energy savings (kWh)		3.2133	3.10589		Tdep (8h)						29.4008	C
dens. Water	991.1				%		0.353078	0.341275		Tdep (9h)						26.6492	C
SAH mass	1	kg			Conventional E.consumption (kWh)		9.10084			Ahorro pico 1						1.58285	kWh
SAH surface	4	m2
Tair	80	C
Twater	40	C			tau
mair	300	m3/h	0.0835083	kg/s	11.9749
mwater	12	l/min	0.19822	kg/s	2522.45
T_outdoors	15	C
Tank capacity	500	kg	1.5	W/K
Tw,tap	11	C
Efficiency (min)	0.12
I_min	50		0
		7.5																									Computation - Peak of demand 1
i	t (s)	t(solar_s)	t(solar_h)	t_calc (h)	t_real (h)	Ta,e,col	Ta,s,col	T tank	Tw,e,bat	Tw,s,bat	density air	density water	cp,air (J/kgK)	mwater	cp,water	T ambient	I(t)	efficiency	Qcol (W)	mreal	Qair	Qwater	Calculated efficiency	Savings (W)	Savings (kWh)		t	Ttank	mreal	Savings (W)	Savings (kWh)
0	0	27000	7.5	0	9	16.3	16.3	11.3	11.3	11.3	1.2208	1000.05	1005.87	0.19822	4195.15	21.7198	213.177	0.868597	740.659	0				0	1.58285		0	29.4008	1.333	1708.81	0.00569602
1	12	27012	7.50333	0.00333333	9.00333	13.1432	25.136	11.3	11.3	11.6192	1.1861	1000.05	1006.1	0.19822	4195.15	21.7266	213.775	0.950513	812.782	0	1007.61	265.481	1.17836	0	1.58285		0.00333333	29.3909	1.333	1707.88	0.011389
2	24	27024	7.50667	0.00666667	9.00667	16.3752	20.6056	11.3015	11.3015	12.1861	1.20372	1000.05	1005.98	0.19822	4195.14	21.7335	214.373	0.866212	742.769	0	355.379	735.617	0.4156	0	1.58285		0.00666667	29.381	1.333	1706.96	0.0170788
3	36	27036	7.51	0.01	9.01	14.723	24.3737	11.3056	11.3056	11.8964	1.18904	1000.05	1006.08	0.19822	4195.14	21.7403	214.971	0.908751	781.419	0	810.815	491.243	0.948213	0	1.58285		0.01	29.371	1.333	1706.04	0.0227656
4	48	27048	7.51333	0.0133333	9.01333	16.1011	22.219	11.3084	11.3084	12.1424	1.1974	1000.05	1006.02	0.19822	4195.14	21.7472	215.568	0.872868	752.652	0	513.973	693.472	0.601068	0	1.58285		0.0133333	29.3611	1.333	1705.12	0.0284494
5	60	27060	7.51667	0.0166667	9.01667	15.3169	23.8712	11.3123	11.3123	12.0065	1.19098	1000.05	1006.07	0.19822	4195.13	21.7541	216.166	0.892818	771.989	0	718.684	577.205	0.840469	0	1.58285		0.0166667	29.3512	1.333	1704.2	0.03413
6	72	27072	7.52	0.02	9.02	15.922	22.8912	11.3156	11.3156	12.1163	1.19478	1000.05	1006.04	0.19822	4195.13	21.7609	216.764	0.877011	760.418	0	585.5	665.846	0.684717	0	1.58285		0.02	29.3413	1.333	1703.28	0.0398076
7	84	27084	7.52333	0.0233333	9.02333	15.5667	23.6348	11.3194	11.3194	12.0564	1.1919	1000.05	1006.06	0.19822	4195.13	21.7678	217.362	0.885868	770.215	0	677.838	612.879	0.792701	0	1.58285		0.0233333	29.3314	1.333	1702.36	0.0454821
8	96	27096	7.52667	0.0266667	9.02667	15.8401	23.2053	11.3229	11.3229	12.1078	1.19356	1000.05	1006.05	0.19822	4195.12	21.7746	217.959	0.87863	766.022	0	618.774	652.679	0.723629	0	1.58285		0.0266667	29.3215	1.333	1701.44	0.0511536
9	108	27108	7.53	0.03	9.03	15.6857	23.5515	11.3266	11.3266	12.0834	1.19222	1000.04	1006.06	0.19822	4195.12	21.7815	218.557	0.882322	771.349	0	660.844	629.357	0.772827	0	1.58285		0.03	29.3116	1.333	1700.52	0.056822
10	120	27120	7.53333	0.0333333	9.03333	15.8141	23.3741	11.3301	11.3301	12.1091	1.19291	1000.04	1006.05	0.19822	4195.11	21.7884	219.154	0.878812	770.382	0	635.145	647.783	0.742774	0	1.58285		0.0333333	29.3017	1.333	1699.6	0.0624873
11	132	27132	7.53667	0.0366667	9.03667	15.7516	23.5447	11.3338	11.3338	12.1011	1.19225	1000.04	1006.06	0.19822	4195.11	21.7952	219.752	0.880156	773.663	0	654.729	638.032	0.765677	0	1.58285		0.0366667	29.2918	1.333	1698.68	0.0681496
12	144	27144	7.54	0.04	9.04	15.816	23.4815	11.3374	11.3374	12.1155	1.19249	1000.04	1006.06	0.19822	4195.11	21.8021	220.349	0.878288	774.12	0	644.005	647.009	0.753135	0	1.58285		0.04	29.282	1.333	1697.77	0.0738088
13	156	27156	7.54333	0.0433333	9.04333	15.7952	23.574	11.3411	11.3411	12.1148	1.19213	1000.04	1006.06	0.19822	4195.1	21.8089	220.946	0.878577	776.473	0	653.533	643.402	0.764278	0	1.58285		0.0433333	29.2721	1.333	1696.85	0.079465
14	168	27168	7.54667	0.0466667	9.04667	15.8311	23.5622	11.3448	11.3448	12.1242	1.19218	1000.04	1006.06	0.19822	4195.1	21.8158	221.543	0.877439	777.563	0	649.517	648.179	0.759582	0	1.58285		0.0466667	29.2622	1.333	1695.93	0.0851181
15	180	27180	7.55	0.05	9.05	15.829	23.62	11.3484	11.3484	12.1269	1.19196	1000.04	1006.06	0.19822	4195.09	21.8226	222.14	0.877259	779.499	0	654.55	647.337	0.765467	0	1.58285		0.05	29.2524	1.333	1695.02	0.0907682
16	192	27192	7.55333	0.0533333	9.05333	15.8523	23.6312	11.3521	11.3521	12.1341	1.19191	1000.04	1006.06	0.19822	4195.09	21.8295	222.738	0.876447	780.87	0	653.535	650.243	0.764281	0	1.58285		0.0533333	29.2425	1.333	1694.1	0.0964152
17	204	27204	7.55667	0.0566667	9.05667	15.8586	23.6735	11.3558	11.3558	12.1382	1.19175	1000.04	1006.06	0.19822	4195.09	21.8364	223.334	0.876062	782.619	0	656.56	650.642	0.767817	0	1.58285		0.0566667	29.2327	1.333	1693.19	0.102059
18	216	27216	7.56	0.06	9.06	15.8763	23.695	11.3595	11.3595	12.1444	1.19166	1000.04	1006.06	0.19822	4195.08	21.8432	223.931	0.875397	784.115	0	656.886	652.713	0.768199	0	1.58285		0.06	29.2228	1.333	1692.27	0.1077
19	228	27228	7.56333	0.0633333	9.06333	15.8864	23.7304	11.3632	11.3632	12.1493	1.19153	1000.04	1006.06	0.19822	4195.08	21.8501	224.528	0.874923	785.779	0	659.014	653.667	0.770687	0	1.58285		0.0633333	29.213	1.333	1691.36	0.113338
20	240	27240	7.56667	0.0666667	9.06667	15.9015	23.7565	11.3669	11.3669	12.155	1.19143	1000.04	1006.06	0.19822	4195.08	21.8569	225.125	0.874327	787.331	0	659.939	655.366	0.771769	0	1.58285		0.0666667	29.2031	1.333	1690.45	0.118973
21	252	27252	7.57	0.07	9.07	15.9133	23.7889	11.3706	11.3706	12.1602	1.1913	1000.03	1006.06	0.19822	4195.07	21.8638	225.722	0.873817	788.957	0	661.666	656.567	0.773789	0	1.58285		0.07	29.1933	1.333	1689.53	0.124605
22	264	27264	7.57333	0.0733333	9.07333	15.9273	23.8171	11.3743	11.3743	12.1658	1.19119	1000.03	1006.07	0.19822	4195.07	21.8706	226.318	0.873254	790.533	0	662.858	658.101	0.775183	0	1.58285		0.0733333	29.1835	1.333	1688.62	0.130233
23	276	27276	7.57667	0.0766667	9.07667	15.9398	23.848	11.3781	11.3781	12.1711	1.19107	1000.03	1006.07	0.19822	4195.06	21.8775	226.915	0.872731	792.141	0	664.407	659.413	0.776995	0	1.58285		0.0766667	29.1737	1.333	1687.71	0.135859
24	288	27288	7.58	0.08	9.08	15.9534	23.8772	11.3818	11.3818	12.1766	1.19096	1000.03	1006.07	0.19822	4195.06	21.8844	227.511	0.872186	793.727	0	665.718	660.872	0.778528	0	1.58285		0.08	29.1639	1.333	1686.8	0.141482
25	300	27300	7.58333	0.0833333	9.08333	15.9663	23.9075	11.3856	11.3856	12.182	1.19084	1000.03	1006.07	0.19822	4195.06	21.8912	228.107	0.87166	795.328	0	667.188	662.233	0.780246	0	1.58285		0.0833333	29.1541	1.333	1685.89	0.147101
26	312	27312	7.58667	0.0866667	9.08667	15.9796	23.9371	11.3893	11.3893	12.1874	1.19073	1000.03	1006.07	0.19822	4195.05	21.8981	228.704	0.871126	796.918	0	668.551	663.66	0.781841	0	1.58285		0.0866667	29.1443	1.333	1684.98	0.152718
27	324	27324	7.59	0.09	9.09	15.9926	23.9672	11.3931	11.3931	12.1929	1.19061	1000.03	1006.07	0.19822	4195.05	21.9049	229.3	0.870601	798.515	0	669.986	665.042	0.783518	0	1.58285		0.09	29.1345	1.333	1684.07	0.158331
28	336	27336	7.59333	0.0933333	9.09333	16.0059	23.997	11.3969	11.3969	12.1983	1.1905	1000.03	1006.07	0.19822	4195.04	21.9118	229.896	0.870075	800.106	0	671.373	666.454	0.785141	0	1.58285		0.0933333	29.1247	1.333	1683.16	0.163942
29	348	27348	7.59667	0.0966667	9.09667	16.019	24.027	11.4006	11.4006	12.2038	1.19038	1000.03	1006.07	0.19822	4195.04	21.9186	230.492	0.869554	801.701	0	672.791	667.847	0.7868	0	1.58285		0.0966667	29.1149	1.333	1682.25	0.169549
30	360	27360	7.6	0.1	9.1	16.0322	24.0568	11.4044	11.4044	12.2093	1.19026	1000.03	1006.07	0.19822	4195.04	21.9255	231.088	0.869034	803.293	0	674.189	669.252	0.788434	0	1.58285		0.1	29.1051	1.333	1681.34	0.175154
31	372	27372	7.60333	0.103333	9.10333	16.0454	24.0868	11.4082	11.4082	12.2147	1.19015	1000.03	1006.07	0.19822	4195.03	21.9324	231.684	0.868518	804.885	0	675.6	670.649	0.790084	0	1.58285		0.103333	29.0953	1.333	1680.44	0.180755
32	384	27384	7.60667	0.106667	9.10667	16.0586	24.1166	11.412	11.412	12.2202	1.19003	1000.02	1006.07	0.19822	4195.03	21.9392	232.279	0.868004	806.477	0	677.002	672.051	0.791724	0	1.58285		0.106667	29.0856	1.333	1679.53	0.186354
33	396	27396	7.61	0.11	9.11	16.0718	24.1466	11.4158	11.4158	12.2257	1.18992	1000.02	1006.07	0.19822	4195.02	21.9461	232.875	0.867492	808.069	0	678.411	673.45	0.793371	0	1.58285		0.11	29.0758	1.333	1678.62	0.191949
34	408	27408	7.61333	0.113333	9.11333	16.085	24.1765	11.4197	11.4197	12.2312	1.1898	1000.02	1006.08	0.19822	4195.02	21.9529	233.47	0.866983	809.66	0	679.815	674.85	0.795013	0	1.58285		0.113333	29.066	1.333	1677.71	0.197542
35	420	27420	7.61667	0.116667	9.11667	16.0982	24.2064	11.4235	11.4235	12.2368	1.18969	1000.02	1006.08	0.19822	4195.02	21.9598	234.066	0.866476	811.25	0	681.221	676.25	0.796658	0	1.58285		0.116667	29.0563	1.333	1676.81	0.203131
36	432	27432	7.62	0.12	9.12	16.1114	24.2364	11.4273	11.4273	12.2423	1.18957	1000.02	1006.08	0.19822	4195.01	21.9666	234.661	0.865972	812.841	0	682.626	677.65	0.798301	0	1.58285		0.12	29.0465	1.333	1675.9	0.208717
37	444	27444	7.62333	0.123333	9.12333	16.1246	24.2663	11.4312	11.4312	12.2478	1.18945	1000.02	1006.08	0.19822	4195.01	21.9735	235.257	0.865471	814.431	0	684.032	679.049	0.799945	0	1.58285		0.123333	29.0368	1.333	1675	0.214301
38	456	27456	7.62667	0.126667	9.12667	16.1378	24.2963	11.435	11.435	12.2533	1.18934	1000.02	1006.08	0.19822	4195	21.9803	235.852	0.864971	816.02	0	685.437	680.449	0.801588	0	1.58285		0.126667	29.0271	1.333	1674.09	0.219881
39	468	27468	7.63	0.13	9.13	16.1511	24.3262	11.4389	11.4389	12.2589	1.18922	1000.02	1006.08	0.19822	4195	21.9872	236.447	0.864474	817.609	0	686.843	681.849	0.803232	0	1.58285		0.13	29.0173	1.333	1673.19	0.225458
40	480	27480	7.63333	0.133333	9.13333	16.1643	24.3562	11.4428	11.4428	12.2644	1.18911	1000.02	1006.08	0.19822	4194.99	21.994	237.042	0.86398	819.198	0	688.248	683.248	0.804875	0	1.58285		0.133333	29.0076	1.333	1672.29	0.231033
41	492	27492	7.63667	0.136667	9.13667	16.1776	24.3861	11.4467	11.4467	12.27	1.18899	1000.02	1006.08	0.19822	4194.99	22.0009	237.637	0.863488	820.786	0	689.653	684.648	0.806519	0	1.58285		0.136667	28.9979	1.333	1671.38	0.236604
42	504	27504	7.64	0.14	9.14	16.1908	24.4161	11.4505	11.4505	12.2756	1.18888	1000.02	1006.08	0.19822	4194.99	22.0078	238.232	0.862998	822.374	0	691.058	686.047	0.808162	0	1.58285		0.14	28.9882	1.333	1670.48	0.242172
43	516	27516	7.64333	0.143333	9.14333	16.2041	24.4461	11.4544	11.4544	12.2812	1.18876	1000.01	1006.08	0.19822	4194.98	22.0146	238.826	0.862511	823.961	0	692.463	687.447	0.809805	0	1.58285		0.143333	28.9784	1.333	1669.58	0.247737
44	528	27528	7.64667	0.146667	9.14667	16.2173	24.4761	11.4583	11.4583	12.2867	1.18864	1000.01	1006.08	0.19822	4194.98	22.0215	239.421	0.862026	825.548	0	693.868	688.846	0.811448	0	1.58285		0.146667	28.9687	1.333	1668.68	0.2533
45	540	27540	7.65	0.15	9.15	16.2306	24.506	11.4622	11.4622	12.2923	1.18853	1000.01	1006.09	0.19822	4194.97	22.0283	240.016	0.861543	827.135	0	695.273	690.245	0.813091	0	1.58285		0.15	28.959	1.333	1667.78	0.258859
46	552	27552	7.65333	0.153333	9.15333	16.2439	24.536	11.4662	11.4662	12.2979	1.18841	1000.01	1006.09	0.19822	4194.97	22.0352	240.61	0.861063	828.721	0	696.678	691.644	0.814734	0	1.58285		0.153333	28.9493	1.333	1666.88	0.264415
47	564	27564	7.65667	0.156667	9.15667	16.2572	24.566	11.4701	11.4701	12.3035	1.1883	1000.01	1006.09	0.19822	4194.97	22.042	241.204	0.860585	830.307	0	698.083	693.043	0.816377	0	1.58285		0.156667	28.9396	1.333	1665.98	0.269968
48	576	27576	7.66	0.16	9.16	16.2704	24.596	11.474	11.474	12.3092	1.18818	1000.01	1006.09	0.19822	4194.96	22.0489	241.799	0.860109	831.892	0	699.488	694.442	0.81802	0	1.58285		0.16	28.93	1.333	1665.08	0.275519
49	588	27588	7.66333	0.163333	9.16333	16.2837	24.626	11.478	11.478	12.3148	1.18807	1000.01	1006.09	0.19822	4194.96	22.0557	242.393	0.859635	833.477	0	700.892	695.841	0.819662	0	1.58285		0.163333	28.9203	1.333	1664.18	0.281066
50	600	27600	7.66667	0.166667	9.16667	16.297	24.656	11.4819	11.4819	12.3204	1.18795	1000.01	1006.09	0.19822	4194.95	22.0626	242.987	0.859164	835.062	0	702.297	697.24	0.821305	0	1.58285		0.166667	28.9106	1.333	1663.28	0.28661
51	612	27612	7.67	0.17	9.17	16.3103	24.686	11.4859	11.4859	12.3261	1.18783	1000.01	1006.09	0.19822	4194.95	22.0694	243.581	0.858695	836.646	0	703.701	698.639	0.822947	0	1.58285		0.17	28.9009	1.333	1662.38	0.292151
52	624	27624	7.67333	0.173333	9.17333	16.3236	24.7161	11.4898	11.4898	12.3317	1.18772	1000.01	1006.09	0.19822	4194.94	22.0763	244.174	0.858228	838.229	0	705.105	700.038	0.82459	0	1.58285		0.173333	28.8913	1.333	1661.48	0.29769
53	636	27636	7.67667	0.176667	9.17667	16.337	24.7461	11.4938	11.4938	12.3374	1.1876	1000	1006.09	0.19822	4194.94	22.0831	244.768	0.857763	839.812	0	706.51	701.436	0.826232	0	1.58285		0.176667	28.8816	1.333	1660.59	0.303225
54	648	27648	7.68	0.18	9.18	16.3503	24.7761	11.4978	11.4978	12.343	1.18749	1000	1006.09	0.19822	4194.94	22.09	245.362	0.857301	841.395	0	707.914	702.835	0.827874	0	1.58285		0.18	28.872	1.333	1659.69	0.308757
55	660	27660	7.68333	0.183333	9.18333	16.3636	24.8061	11.5018	11.5018	12.3487	1.18737	1000	1006.09	0.19822	4194.93	22.0968	245.955	0.85684	842.977	0	709.318	704.233	0.829516	0	1.58285		0.183333	28.8623	1.333	1658.8	0.314287
56	672	27672	7.68667	0.186667	9.18667	16.3769	24.8362	11.5058	11.5058	12.3544	1.18726	1000	1006.1	0.19822	4194.93	22.1037	246.549	0.856382	844.559	0	710.722	705.631	0.831158	0	1.58285		0.186667	28.8527	1.333	1657.9	0.319813
57	684	27684	7.69	0.19	9.19	16.3903	24.8662	11.5098	11.5098	12.3601	1.18714	1000	1006.1	0.19822	4194.92	22.1105	247.142	0.855926	846.14	0	712.126	707.029	0.832799	0	1.58285		0.19	28.843	1.333	1657	0.325336
58	696	27696	7.69333	0.193333	9.19333	16.4036	24.8963	11.5138	11.5138	12.3658	1.18702	1000	1006.1	0.19822	4194.92	22.1174	247.735	0.855472	847.721	0	713.529	708.427	0.834441	0	1.58285		0.193333	28.8334	1.333	1656.11	0.330857
59	708	27708	7.69667	0.196667	9.19667	16.417	24.9263	11.5178	11.5178	12.3715	1.18691	999.999	1006.1	0.19822	4194.92	22.1242	248.328	0.85502	849.302	0	714.933	709.825	0.836082	0	1.58285		0.196667	28.8238	1.333	1655.22	0.336374
60	720	27720	7.7	0.2	9.2	16.4303	24.9564	11.5219	11.5219	12.3772	1.18679	999.998	1006.1	0.19822	4194.91	22.1311	248.921	0.85457	850.882	0	716.337	711.223	0.837724	0	1.58285		0.2	28.8141	1.333	1654.32	0.341889
61	732	27732	7.70333	0.203333	9.20333	16.4437	24.9864	11.5259	11.5259	12.3829	1.18668	999.997	1006.1	0.19822	4194.91	22.1379	249.514	0.854122	852.461	0	717.74	712.621	0.839365	0	1.58285		0.203333	28.8045	1.333	1653.43	0.3474
62	744	27744	7.70667	0.206667	9.20667	16.4571	25.0165	11.53	11.53	12.3887	1.18656	999.996	1006.1	0.19822	4194.9	22.1448	250.107	0.853676	854.04	0	719.143	714.019	0.841006	0	1.58285		0.206667	28.7949	1.333	1652.54	0.352908
63	756	27756	7.71	0.21	9.21	16.4704	25.0465	11.534	11.534	12.3944	1.18645	999.995	1006.1	0.19822	4194.9	22.1516	250.699	0.853232	855.619	0	720.547	715.416	0.842647	0	1.58285		0.21	28.7853	1.333	1651.64	0.358414
64	768	27768	7.71333	0.213333	9.21333	16.4838	25.0766	11.5381	11.5381	12.4001	1.18633	999.994	1006.1	0.19822	4194.89	22.1585	251.292	0.85279	857.197	0	721.95	716.814	0.844288	0	1.58285		0.213333	28.7757	1.333	1650.75	0.363916
65	780	27780	7.71667	0.216667	9.21667	16.4972	25.1067	11.5421	11.5421	12.4059	1.18621	999.993	1006.1	0.19822	4194.89	22.1653	251.884	0.852351	858.775	0	723.353	718.211	0.845929	0	1.58285		0.216667	28.7661	1.333	1649.86	0.369416
66	792	27792	7.72	0.22	9.22	16.5106	25.1368	11.5462	11.5462	12.4116	1.1861	999.992	1006.1	0.19822	4194.89	22.1721	252.477	0.851913	860.352	0	724.755	719.608	0.847569	0	1.58285		0.22	28.7565	1.333	1648.97	0.374913
67	804	27804	7.72333	0.223333	9.22333	16.524	25.1669	11.5503	11.5503	12.4174	1.18598	999.991	1006.11	0.19822	4194.88	22.179	253.069	0.851477	861.929	0	726.158	721.005	0.84921	0	1.58285		0.223333	28.7469	1.333	1648.08	0.380406
68	816	27816	7.72667	0.226667	9.22667	16.5374	25.1969	11.5544	11.5544	12.4232	1.18587	999.99	1006.11	0.19822	4194.88	22.1858	253.661	0.851043	863.505	0	727.561	722.402	0.85085	0	1.58285		0.226667	28.7374	1.333	1647.19	0.385897
69	828	27828	7.73	0.23	9.23	16.5508	25.227	11.5585	11.5585	12.429	1.18575	999.989	1006.11	0.19822	4194.87	22.1927	254.253	0.850611	865.081	0	728.963	723.799	0.85249	0	1.58285		0.23	28.7278	1.333	1646.3	0.391384
70	840	27840	7.73333	0.233333	9.23333	16.5642	25.2571	11.5626	11.5626	12.4348	1.18564	999.988	1006.11	0.19822	4194.87	22.1995	254.845	0.850182	866.656	0	730.366	725.196	0.85413	0	1.58285		0.233333	28.7182	1.333	1645.41	0.396869
71	852	27852	7.73667	0.236667	9.23667	16.5776	25.2872	11.5667	11.5667	12.4406	1.18552	999.987	1006.11	0.19822	4194.86	22.2064	255.436	0.849754	868.231	0	731.768	726.592	0.85577	0	1.58285		0.236667	28.7086	1.333	1644.52	0.402351
72	864	27864	7.74	0.24	9.24	16.591	25.3173	11.5709	11.5709	12.4464	1.1854	999.986	1006.11	0.19822	4194.86	22.2132	256.028	0.849327	869.806	0	733.17	727.989	0.85741	0	1.58285		0.24	28.6991	1.333	1643.64	0.40783
73	876	27876	7.74333	0.243333	9.24333	16.6045	25.3474	11.575	11.575	12.4522	1.18529	999.986	1006.11	0.19822	4194.86	22.2201	256.619	0.848903	871.38	0	734.572	729.385	0.859049	0	1.58285		0.243333	28.6895	1.333	1642.75	0.413306
74	888	27888	7.74667	0.246667	9.24667	16.6179	25.3775	11.5791	11.5791	12.458	1.18517	999.985	1006.11	0.19822	4194.85	22.2269	257.211	0.848481	872.953	0	735.974	730.781	0.860689	0	1.58285		0.246667	28.68	1.333	1641.86	0.418778
75	900	27900	7.75	0.25	9.25	16.6313	25.4077	11.5833	11.5833	12.4638	1.18506	999.984	1006.11	0.19822	4194.85	22.2337	257.802	0.84806	874.526	0	737.375	732.177	0.862328	0	1.58285		0.25	28.6704	1.333	1640.98	0.424248
76	912	27912	7.75333	0.253333	9.25333	16.6448	25.4378	11.5875	11.5875	12.4697	1.18494	999.983	1006.11	0.19822	4194.84	22.2406	258.393	0.847642	876.098	0	738.777	733.573	0.863967	0	1.58285		0.253333	28.6609	1.333	1640.09	0.429715
77	924	27924	7.75667	0.256667	9.25667	16.6582	25.4679	11.5916	11.5916	12.4755	1.18483	999.982	1006.11	0.19822	4194.84	22.2474	258.984	0.847225	877.67	0	740.178	734.969	0.865606	0	1.58285		0.256667	28.6514	1.333	1639.2	0.435179
78	936	27936	7.76	0.26	9.26	16.6717	25.498	11.5958	11.5958	12.4814	1.18471	999.981	1006.12	0.19822	4194.83	22.2543	259.575	0.84681	879.242	0	741.58	736.365	0.867245	0	1.58285		0.26	28.6418	1.333	1638.32	0.44064
79	948	27948	7.76333	0.263333	9.26333	16.6851	25.5281	11.6	11.6	12.4873	1.18459	999.98	1006.12	0.19822	4194.83	22.2611	260.165	0.846397	880.813	0	742.981	737.76	0.868883	0	1.58285		0.263333	28.6323	1.333	1637.44	0.446098
80	960	27960	7.76667	0.266667	9.26667	16.6986	25.5583	11.6042	11.6042	12.4931	1.18448	999.979	1006.12	0.19822	4194.82	22.268	260.756	0.845986	882.383	0	744.382	739.156	0.870522	0	1.58285		0.266667	28.6228	1.333	1636.55	0.451554
81	972	27972	7.77	0.27	9.27	16.7121	25.5884	11.6084	11.6084	12.499	1.18436	999.978	1006.12	0.19822	4194.82	22.2748	261.346	0.845576	883.953	0	745.783	740.551	0.87216	0	1.58285		0.27	28.6133	1.333	1635.67	0.457006
82	984	27984	7.77333	0.273333	9.27333	16.7256	25.6186	11.6126	11.6126	12.5049	1.18425	999.977	1006.12	0.19822	4194.82	22.2816	261.937	0.845168	885.523	0	747.183	741.946	0.873798	0	1.58285		0.273333	28.6038	1.333	1634.78	0.462455
83	996	27996	7.77667	0.276667	9.27667	16.739	25.6487	11.6168	11.6168	12.5108	1.18413	999.976	1006.12	0.19822	4194.81	22.2885	262.527	0.844762	887.092	0	748.584	743.341	0.875436	0	1.58285		0.276667	28.5943	1.333	1633.9	0.467902
84	1008	28008	7.78	0.28	9.28	16.7525	25.6788	11.621	11.621	12.5167	1.18402	999.975	1006.12	0.19822	4194.81	22.2953	263.117	0.844358	888.66	0	749.984	744.736	0.877073	0	1.58285		0.28	28.5848	1.333	1633.02	0.473345
85	1020	28020	7.78333	0.283333	9.28333	16.766	25.709	11.6253	11.6253	12.5226	1.1839	999.974	1006.12	0.19822	4194.8	22.3021	263.707	0.843956	890.228	0	751.385	746.13	0.878711	0	1.58285		0.283333	28.5753	1.333	1632.14	0.478785
86	1032	28032	7.78667	0.286667	9.28667	16.7795	25.7392	11.6295	11.6295	12.5285	1.18378	999.972	1006.12	0.19822	4194.8	22.309	264.297	0.843555	891.796	0	752.785	747.525	0.880348	0	1.58285		0.286667	28.5658	1.333	1631.26	0.484223
87	1044	28044	7.79	0.29	9.29	16.793	25.7693	11.6337	11.6337	12.5344	1.18367	999.971	1006.12	0.19822	4194.79	22.3158	264.886	0.843156	893.362	0	754.185	748.919	0.881985	0	1.58285		0.29	28.5563	1.333	1630.38	0.489657
88	1056	28056	7.79333	0.293333	9.29333	16.8065	25.7995	11.638	11.638	12.5404	1.18355	999.97	1006.12	0.19822	4194.79	22.3227	265.476	0.842759	894.929	0	755.584	750.313	0.883622	0	1.58285		0.293333	28.5468	1.333	1629.5	0.495089
89	1068	28068	7.79667	0.296667	9.29667	16.82	25.8296	11.6423	11.6423	12.5463	1.18344	999.969	1006.13	0.19822	4194.78	22.3295	266.065	0.842363	896.495	0	756.984	751.707	0.885259	0	1.58285		0.296667	28.5373	1.333	1628.62	0.500518
90	1080	28080	7.8	0.3	9.3	16.8336	25.8598	11.6465	11.6465	12.5523	1.18332	999.968	1006.13	0.19822	4194.78	22.3363	266.655	0.841969	898.06	0	758.383	753.101	0.886896	0	1.58285		0.3	28.5279	1.333	1627.74	0.505944
91	1092	28092	7.80333	0.303333	9.30333	16.8471	25.89	11.6508	11.6508	12.5582	1.18321	999.967	1006.13	0.19822	4194.78	22.3432	267.244	0.841577	899.625	0	759.783	754.495	0.888532	0	1.58285		0.303333	28.5184	1.333	1626.86	0.511367
92	1104	28104	7.80667	0.306667	9.30667	16.8606	25.9201	11.6551	11.6551	12.5642	1.18309	999.966	1006.13	0.19822	4194.77	22.35	267.833	0.841186	901.189	0	761.182	755.888	0.890168	0	1.58285		0.306667	28.509	1.333	1625.98	0.516786
93	1116	28116	7.81	0.31	9.31	16.8742	25.9503	11.6594	11.6594	12.5702	1.18297	999.965	1006.13	0.19822	4194.77	22.3568	268.422	0.840797	902.753	0	762.581	757.282	0.891804	0	1.58285		0.31	28.4995	1.333	1625.1	0.522203
94	1128	28128	7.81333	0.313333	9.31333	16.8877	25.9805	11.6637	11.6637	12.5761	1.18286	999.964	1006.13	0.19822	4194.76	22.3637	269.011	0.84041	904.317	0	763.979	758.675	0.89344	0	1.58285		0.313333	28.4901	1.333	1624.23	0.527618
95	1140	28140	7.81667	0.316667	9.31667	16.9012	26.0107	11.668	11.668	12.5821	1.18274	999.963	1006.13	0.19822	4194.76	22.3705	269.599	0.840024	905.879	0	765.378	760.068	0.895076	0	1.58285		0.316667	28.4806	1.333	1623.35	0.533029
96	1152	28152	7.82	0.32	9.32	16.9148	26.0409	11.6723	11.6723	12.5881	1.18263	999.962	1006.13	0.19822	4194.75	22.3773	270.188	0.83964	907.442	0	766.776	761.461	0.896711	0	1.58285		0.32	28.4712	1.333	1622.47	0.538437
97	1164	28164	7.82333	0.323333	9.32333	16.9283	26.071	11.6767	11.6767	12.5941	1.18251	999.961	1006.13	0.19822	4194.75	22.3842	270.776	0.839258	909.003	0	768.175	762.853	0.898346	0	1.58285		0.323333	28.4617	1.333	1621.6	0.543842
98	1176	28176	7.82667	0.326667	9.32667	16.9419	26.1012	11.681	11.681	12.6001	1.1824	999.96	1006.13	0.19822	4194.74	22.391	271.364	0.838877	910.565	0	769.573	764.246	0.899981	0	1.58285		0.326667	28.4523	1.333	1620.72	0.549245
99	1188	28188	7.83	0.33	9.33	16.9555	26.1314	11.6853	11.6853	12.6062	1.18228	999.959	1006.13	0.19822	4194.74	22.3978	271.952	0.838498	912.125	0	770.971	765.638	0.901616	0	1.58285		0.33	28.4429	1.333	1619.85	0.554644
100	1200	28200	7.83333	0.333333	9.33333	16.969	26.1616	11.6897	11.6897	12.6122	1.18216	999.958	1006.14	0.19822	4194.73	22.4047	272.54	0.83812	913.685	0	772.368	767.03	0.90325	0	1.58285		0.333333	28.4335	1.333	1618.97	0.560041
101	1212	28212	7.83667	0.336667	9.33667	16.9826	26.1918	11.6941	11.6941	12.6182	1.18205	999.957	1006.14	0.19822	4194.73	22.4115	273.128	0.837744	915.245	0	773.766	768.422	0.904885	0	1.58285		0.336667	28.4241	1.333	1618.1	0.565434
102	1224	28224	7.84	0.34	9.34	16.9962	26.222	11.6984	11.6984	12.6243	1.18193	999.956	1006.14	0.19822	4194.73	22.4183	273.715	0.83737	916.804	0	775.163	769.814	0.906519	0	1.58285		0.34	28.4147	1.333	1617.22	0.570825
103	1236	28236	7.84333	0.343333	9.34333	17.0098	26.2522	11.7028	11.7028	12.6303	1.18182	999.955	1006.14	0.19822	4194.72	22.4251	274.303	0.836997	918.362	0	776.56	771.206	0.908153	0	1.58285		0.343333	28.4053	1.333	1616.35	0.576213
104	1248	28248	7.84667	0.346667	9.34667	17.0234	26.2824	11.7072	11.7072	12.6364	1.1817	999.954	1006.14	0.19822	4194.72	22.432	274.89	0.836625	919.92	0	777.957	772.597	0.909786	0	1.58285		0.346667	28.3959	1.333	1615.48	0.581598
105	1260	28260	7.85	0.35	9.35	17.037	26.3127	11.7116	11.7116	12.6424	1.18159	999.953	1006.14	0.19822	4194.71	22.4388	275.477	0.836256	921.478	0	779.354	773.988	0.91142	0	1.58285		0.35	28.3865	1.333	1614.61	0.58698
106	1272	28272	7.85333	0.353333	9.35333	17.0506	26.3429	11.716	11.716	12.6485	1.18147	999.952	1006.14	0.19822	4194.71	22.4456	276.064	0.835887	923.035	0	780.751	775.379	0.913053	0	1.58285		0.353333	28.3771	1.333	1613.74	0.592359
107	1284	28284	7.85667	0.356667	9.35667	17.0642	26.3731	11.7204	11.7204	12.6546	1.18136	999.951	1006.14	0.19822	4194.7	22.4525	276.651	0.83552	924.591	0	782.147	776.77	0.914686	0	1.58285		0.356667	28.3677	1.333	1612.86	0.597735
108	1296	28296	7.86	0.36	9.36	17.0778	26.4033	11.7248	11.7248	12.6607	1.18124	999.95	1006.14	0.19822	4194.7	22.4593	277.238	0.835155	926.147	0	783.543	778.161	0.916319	0	1.58285		0.36	28.3583	1.333	1611.99	0.603109
109	1308	28308	7.86333	0.363333	9.36333	17.0914	26.4335	11.7292	11.7292	12.6668	1.18112	999.949	1006.14	0.19822	4194.69	22.4661	277.825	0.834791	927.702	0	784.939	779.551	0.917951	0	1.58285		0.363333	28.349	1.333	1611.12	0.608479
110	1320	28320	7.86667	0.366667	9.36667	17.105	26.4637	11.7337	11.7337	12.6729	1.18101	999.948	1006.14	0.19822	4194.69	22.4729	278.411	0.834429	929.256	0	786.335	780.941	0.919584	0	1.58285		0.366667	28.3396	1.333	1610.25	0.613847
111	1332	28332	7.87	0.37	9.37	17.1186	26.494	11.7381	11.7381	12.679	1.18089	999.947	1006.15	0.19822	4194.68	22.4798	278.997	0.834068	930.811	0	787.73	782.331	0.921216	0	1.58285		0.37	28.3302	1.333	1609.38	0.619211
112	1344	28344	7.87333	0.373333	9.37333	17.1323	26.5242	11.7425	11.7425	12.6851	1.18078	999.945	1006.15	0.19822	4194.68	22.4866	279.583	0.833708	932.364	0	789.126	783.721	0.922847	0	1.58285		0.373333	28.3209	1.333	1608.52	0.624573
113	1356	28356	7.87667	0.376667	9.37667	17.1459	26.5544	11.747	11.747	12.6913	1.18066	999.944	1006.15	0.19822	4194.67	22.4934	280.169	0.83335	933.917	0	790.521	785.111	0.924479	0	1.58285		0.376667	28.3115	1.333	1607.65	0.629932
114	1368	28368	7.88	0.38	9.38	17.1595	26.5847	11.7515	11.7515	12.6974	1.18055	999.943	1006.15	0.19822	4194.67	22.5002	280.755	0.832994	935.469	0	791.916	786.5	0.92611	0	1.58285		0.38	28.3022	1.333	1606.78	0.635288
115	1380	28380	7.88333	0.383333	9.38333	17.1732	26.6149	11.7559	11.7559	12.7035	1.18043	999.942	1006.15	0.19822	4194.67	22.5071	281.341	0.832639	937.021	0	793.31	787.89	0.927741	0	1.58285		0.383333	28.2928	1.333	1605.91	0.640641
116	1392	28392	7.88667	0.386667	9.38667	17.1868	26.6451	11.7604	11.7604	12.7097	1.18032	999.941	1006.15	0.19822	4194.66	22.5139	281.926	0.832285	938.572	0	794.705	789.279	0.929372	0	1.58285		0.386667	28.2835	1.333	1605.04	0.645991
117	1404	28404	7.89	0.39	9.39	17.2005	26.6754	11.7649	11.7649	12.7158	1.1802	999.94	1006.15	0.19822	4194.66	22.5207	282.512	0.831933	940.123	0	796.099	790.667	0.931003	0	1.58285		0.39	28.2742	1.333	1604.18	0.651338
118	1416	28416	7.89333	0.393333	9.39333	17.2141	26.7056	11.7694	11.7694	12.722	1.18008	999.939	1006.15	0.19822	4194.65	22.5275	283.097	0.831582	941.673	0	797.493	792.056	0.932633	0	1.58285		0.393333	28.2649	1.333	1603.31	0.656682
119	1428	28428	7.89667	0.396667	9.39667	17.2278	26.7359	11.7739	11.7739	12.7282	1.17997	999.938	1006.15	0.19822	4194.65	22.5343	283.682	0.831232	943.223	0	798.887	793.444	0.934263	0	1.58285		0.396667	28.2555	1.333	1602.45	0.662024
120	1440	28440	7.9	0.4	9.4	17.2415	26.7661	11.7784	11.7784	12.7344	1.17985	999.937	1006.15	0.19822	4194.64	22.5412	284.267	0.830884	944.772	0	800.281	794.832	0.935893	0	1.58285		0.4	28.2462	1.333	1601.58	0.667363
121	1452	28452	7.90333	0.403333	9.40333	17.2551	26.7963	11.7829	11.7829	12.7406	1.17974	999.936	1006.16	0.19822	4194.64	22.548	284.852	0.830538	946.32	0	801.674	796.22	0.937522	0	1.58285		0.403333	28.2369	1.333	1600.72	0.672698
122	1464	28464	7.90667	0.406667	9.40667	17.2688	26.8266	11.7875	11.7875	12.7468	1.17962	999.935	1006.16	0.19822	4194.63	22.5548	285.436	0.830192	947.868	0	803.067	797.608	0.939152	0	1.58285		0.406667	28.2276	1.333	1599.85	0.678031
123	1476	28476	7.91	0.41	9.41	17.2825	26.8568	11.792	11.792	12.753	1.17951	999.934	1006.16	0.19822	4194.63	22.5616	286.021	0.829848	949.415	0	804.46	798.995	0.940781	0	1.58285		0.41	28.2183	1.333	1598.99	0.683361
124	1488	28488	7.91333	0.413333	9.41333	17.2962	26.8871	11.7965	11.7965	12.7592	1.17939	999.933	1006.16	0.19822	4194.62	22.5684	286.605	0.829506	950.961	0	805.853	800.383	0.942409	0	1.58285		0.413333	28.209	1.333	1598.13	0.688688
125	1500	28500	7.91667	0.416667	9.41667	17.3099	26.9174	11.8011	11.8011	12.7654	1.17928	999.931	1006.16	0.19822	4194.62	22.5752	287.189	0.829164	952.507	0	807.246	801.77	0.944038	0	1.58285		0.416667	28.1997	1.333	1597.26	0.694012
126	1512	28512	7.92	0.42	9.42	17.3236	26.9476	11.8057	11.8057	12.7716	1.17916	999.93	1006.16	0.19822	4194.61	22.5821	287.773	0.828824	954.053	0	808.638	803.156	0.945666	0	1.58285		0.42	28.1904	1.333	1596.4	0.699334
127	1524	28524	7.92333	0.423333	9.42333	17.3373	26.9779	11.8102	11.8102	12.7779	1.17905	999.929	1006.16	0.19822	4194.61	22.5889	288.357	0.828486	955.598	0	810.03	804.543	0.947294	0	1.58285		0.423333	28.1812	1.333	1595.54	0.704652
128	1536	28536	7.92667	0.426667	9.42667	17.351	27.0081	11.8148	11.8148	12.7841	1.17893	999.928	1006.16	0.19822	4194.6	22.5957	288.94	0.828149	957.142	0	811.422	805.929	0.948922	0	1.58285		0.426667	28.1719	1.333	1594.68	0.709968
129	1548	28548	7.93	0.43	9.43	17.3647	27.0384	11.8194	11.8194	12.7904	1.17881	999.927	1006.16	0.19822	4194.6	22.6025	289.524	0.827813	958.686	0	812.813	807.315	0.950549	0	1.58285		0.43	28.1626	1.333	1593.82	0.71528
130	1560	28560	7.93333	0.433333	9.43333	17.3784	27.0687	11.824	11.824	12.7966	1.1787	999.926	1006.16	0.19822	4194.59	22.6093	290.107	0.827478	960.229	0	814.204	808.701	0.952176	0	1.58285		0.433333	28.1534	1.333	1592.96	0.72059
131	1572	28572	7.93667	0.436667	9.43667	17.3921	27.0989	11.8286	11.8286	12.8029	1.17858	999.925	1006.16	0.19822	4194.59	22.6161	290.69	0.827145	961.771	0	815.596	810.087	0.953803	0	1.58285		0.436667	28.1441	1.333	1592.1	0.725897
[truncated: 4,369 more rows]
